# Supplementary material
Source: publisher figshare collection journal article supplement (https://gsajournals.figshare.com/ndownloader/files/30747091)
Supplement: Supplementary file 1 [file 30747091]

## Sheet: 46_DEAnalysis
Supplementary Data S7
Tables containing differential expression analysis results of each comparison between X. laevis brain regions at NF stage 46.
Highlighted rows indicate genes considered differentially expressed, with an adjusted p-value < 0.05 and an absolute log2fold change > 2.

## Sheet: 46_FBvMB
geneSymbol	baseMean	log2FoldChange	lfcSE	stat	pvalue	padj	NPC Enriched	IN Enriched
12S ribosomal RNA	62.5803	-0.753514	0.33929	-2.22086	0.0263606	0.166523
16S ribosomal RNA	24244.3	-0.144761	0.326559	-0.443293	0.657554	0.841603
1a11.L	9.3369	0.0748072	1.15106	0.06499	0.948182	0.979348
42sp43.L	5.85442	4.93763	2.49253	1.98097	0.047595	0.226572
42sp50.L	7.09614	2.23201	2.05267	1.08736	0.276876	0.553861		X
ATP6	595.727	0.460543	0.635161	0.725081	0.468403	0.717434
ATP8	33.1282	0.684474	0.737615	0.927956	0.35343	0.623989
COX1	19387.3	0.0457204	0.306654	0.149094	0.881479	0.952732
COX2	3453.22	0.130218	0.395744	0.329046	0.742121	0.887093
COX3	6220.2	0.17332	0.461394	0.375643	0.707182	0.868005
CYTB	50.0152	0.478537	0.540204	0.885845	0.375701	0.643248
LOC100036663.S	7.60294	5.37198	1.925	2.79063	0.00526055	0.0624202
LOC100036800	4.46724	3.80491	3.19394	1.19129	0.23354	1
LOC100036800.S	3.55722	5.08169	3.60765	1.40859	0.158958	1
LOC100036803	535.519	-0.271062	0.251304	-1.07862	0.280756	0.557384
LOC100036818	24.0914	2.9872	0.556637	5.36651	8.02751e-08	6.01966e-06
LOC100036823	30.334	2.77816	0.622908	4.45998	8.19682e-06	0.000356625
LOC100036824	8.78133	2.03404	1.70308	1.19433	0.23235	0.507837
LOC100036831	362.051	0.205463	0.155187	1.32398	0.185511	0.450244
LOC100036845	24.9355	2.18851	2.02517	1.08066	0.279849	0.556626
LOC100036845.L	7.35308	5.78272	2.78046	2.07977	0.0375464	0.200177
LOC100036869	71.0833	0.102558	0.323633	0.316897	0.751322	0.891481
LOC100036872	10.0674	1.16313	1.76479	0.659076	0.509847	0.747471
LOC100036880	2.57404	4.58727	3.66773	1.25071	0.21104	1
LOC100036883	6.72819	6.11413	2.01666	3.03182	0.00243087	0.0364396
LOC100036895	3.61363	5.28284	4.07436	1.29661	0.194767	1
LOC100036897	6.83053	4.19544	2.42658	1.72895	0.0838177	0.301371
LOC100036907.L	29.0113	-0.166643	0.655074	-0.254389	0.799195	0.914258
LOC100036910	558.337	-0.430733	0.228541	-1.88471	0.0594692	0.254602
LOC100036914	1.22285	3.69395	2.78821	1.32484	0.185223	1
LOC100036915	248.673	-0.161426	0.205971	-0.78373	0.433199	0.689201
LOC100036918	5.39275	2.91963	1.55419	1.87856	0.0603048	1
LOC100036932	17.6348	4.14692	1.55678	2.66378	0.00772678	0.0804529
LOC100036952	18.3675	1.32333	1.10258	1.20021	0.230056	0.505536
LOC100036976	5.95949	-0.962568	1.49364	-0.644446	0.519287	0.753834
LOC100036994	143.952	-0.0184949	0.297771	-0.0621113	0.950474	0.980454
LOC100036997	29.9487	0.515729	0.686555	0.751183	0.452542	0.704479
LOC100037001	288.67	-0.14257	0.234574	-0.607786	0.543329	0.770027
LOC100037016	18.5007	-0.160096	0.675981	-0.236835	0.812785	0.920587
LOC100037047	4.81445	5.84596	3.44487	1.69701	0.0896957	1
LOC100037090	210.029	-0.0543149	0.277424	-0.195783	0.84478	0.93615
LOC100037108	225.346	-0.524453	0.186382	-2.81386	0.00489501	0.0596193
LOC100037118	30.2493	1.38067	0.708237	1.94945	0.0512417	0.235556
LOC100037145	12.3115	1.46883	1.33139	1.10323	0.269929	0.546995
LOC100037177	5.1325	0.133823	1.58949	0.0841925	0.932903	1
LOC100037180	22.8855	2.11093	1.5106	1.39742	0.162289	0.421813
LOC100037191.L	6.15874	2.59925	2.71254	0.958233	0.337945	0.610187
LOC100037197	3.57293	2.93917	2.65157	1.10846	0.267662	1
LOC100037204	5.73976	0.225834	2.24672	0.100517	0.919934	1
LOC100037213	469.958	-0.0171037	0.283599	-0.0603093	0.951909	0.980868
LOC100037217	55.1318	0.19908	0.417244	0.477129	0.63327	0.828643
LOC100037226	172.287	-0.342539	0.217527	-1.5747	0.115326	0.353295
LOC100037235	68.1852	0.134845	0.280556	0.480635	0.630776	0.826976
LOC100037903.1	4.66556	0.340328	1.35953	0.250327	0.802335	1
LOC100049113	8.3164	0.8835	1.30244	0.678344	0.497554	0.739774
LOC100049116	294.558	0.154039	0.175094	0.87975	0.378995	0.646228
LOC100049121	216.722	-0.317807	0.221606	-1.43411	0.151541	0.407119
LOC100049127	42.7028	-0.379528	0.410243	-0.92513	0.354898	0.625282
LOC100049136	1630.88	-0.0837316	0.293124	-0.285652	0.775144	0.903105
LOC100049756	4.22052	1.0101	1.64613	0.61362	0.539466	1
LOC100101274	4.50384	3.77054	3.22962	1.16749	0.243014	1
LOC100101277	188.635	-0.216658	0.209865	-1.03237	0.301898	0.577048
LOC100101278	1.5564	4.60342	2.78309	1.65407	0.0981138	1
LOC100101281	45.1442	-0.554426	0.369428	-1.50077	0.133415	0.380706
LOC100101282	11.2863	2.07076	1.65107	1.25419	0.209774	0.480857
LOC100101283	58.3135	0.72632	0.31978	2.27131	0.023128	0.155056		X
LOC100101333	60.7444	-0.0570159	0.462167	-0.123366	0.901817	0.960602
LOC100125664	13.5415	3.44053	1.7462	1.9703	0.0488046	0.229761
LOC100125668	276.129	0.349707	0.2065	1.69349	0.0903613	0.312813
LOC100126603	30.1513	0.354477	0.560798	0.632094	0.527325	0.75911
LOC100126627	1.82925	0.814581	2.93701	0.27735	0.781511	1
LOC100126638	34.9776	0.311555	0.438509	0.710487	0.477402	0.724911
LOC100126648	99.2574	0.721392	0.398462	1.81044	0.0702274	0.275579
LOC100126651	20.2893	1.06642	1.21625	0.876808	0.380591	0.647311
LOC100126657	5.77249	2.31477	2.49241	0.928726	0.353031	1
LOC100126660	109.34	-1.3038	0.345364	-3.77516	0.000159907	0.00445383
LOC100127249	9.05274	2.95133	2.05651	1.43512	0.151254	0.406685
LOC100127254	5.00883	5.02339	2.66551	1.88459	0.0594854	1
LOC100127277	128.52	2.01912	0.893206	2.26053	0.0237885	0.157423
LOC100127280	94.7895	4.16426	1.62662	2.56008	NA	1
LOC100127286	24.526	0.509199	0.586906	0.867599	0.385614	0.651143
LOC100127287	16.1613	5.16789	1.76715	2.92442	0.00345094	0.0468053
LOC100127296	95.1775	0.0446935	0.246035	0.181655	0.855854	0.941141
LOC100127300	75.6197	-0.413467	0.283047	-1.46077	0.144078	0.396132
LOC100127316	45.3784	0.651332	0.479583	1.35812	0.174425	0.436867
LOC100127323	89.626	0.38606	0.345922	1.11603	0.264408	0.541075
LOC100127329	1311.98	-0.14028	0.243852	-0.575267	0.565111	0.78496
LOC100127334	2.85012	5.33471	2.83036	1.88482	0.0594544	1
LOC100127337	4.95671	3.7794	2.5049	1.5088	0.131349	1
LOC100127794.L	21.5508	1.74242	1.11251	1.56621	0.117299	0.356542
LOC100135120.L	86.2139	0.348279	0.343089	1.01513	0.310045	0.584491
LOC100135146.L	15.8946	0.79635	0.971761	0.819492	0.412506	0.672737
LOC100135146.S	8.84679	1.04573	1.58096	0.661454	0.508321	0.746251
LOC100135389.L	6.4318	5.73452	3.00066	1.91109	0.0559933	0.247199
LOC100137612	70.1724	-0.108848	0.233532	-0.466094	0.641148	0.832631
LOC100137619	4.31931	-0.812534	2.52418	-0.3219	0.747529	1
LOC100137633	2.83587	1.56519	2.86267	0.54676	0.584544	1
LOC100137634	176.97	0.0405164	0.192579	0.210388	0.833364	0.93058		X
LOC100137643	4.03486	0.990421	2.4788	0.399557	0.689483	1
LOC100137665	14.6927	3.18175	1.62754	1.95494	0.0505898	0.234086
LOC100137672	21.9814	0.637272	0.66627	0.956477	0.338831	0.610847
LOC100137672.S	32.9537	-0.878882	0.506653	-1.73468	0.0827974	0.299543
LOC100137678	10.1954	6.84255	2.63693	2.5949	0.00946193	0.0906247
LOC100137691	272.505	-0.991974	0.344558	-2.87898	0.00398964	0.0516632
LOC100137715	2.69968	3.98654	3.33321	1.19601	0.231694	1
LOC100144987.S	2.33056	5.27714	2.52244	2.09208	0.0364313	1
LOC100145345.L	11.9627	1.27862	1.38713	0.921773	0.356647	0.626728
LOC100145450.S	105.956	-0.568591	0.247292	-2.29927	0.0214894	0.14887
LOC100145473.S	4.63953	4.48091	3.14813	1.42336	0.154633	1
LOC100145531.L	21.9492	-0.724047	0.707979	-1.0227	0.306452	0.581212
LOC100145533.L	72.3787	2.37146	1.34501	1.76315	0.0778756	0.290906
LOC100145817.L	2.5179	4.57659	3.25846	1.40453	0.160162	1
LOC100158280	8.87616	3.45229	1.63533	2.11106	0.0347672	0.193261
LOC100158299	225.732	-0.343124	0.179156	-1.91522	0.0554644	0.246048
LOC100158305.L	12.4137	5.59679	1.79966	3.10992	0.0018714	0.030127
LOC100158309	6.22552	3.1658	3.03909	1.04169	0.297554	0.573029
LOC100158314	5.77096	5.00761	2.56179	1.95473	0.0506152	1
LOC100158321	73.7551	-0.382947	0.274089	-1.39716	0.162365	0.421909
LOC100158331	35.3485	0.548261	0.489211	1.1207	0.262414	0.538882
LOC100158340	801.69	-0.230734	0.214794	-1.07421	0.282727	0.558978
LOC100158347	166.973	-0.187193	0.244423	-0.765858	0.443761	0.697991
LOC100158361	184.449	-0.454933	0.270312	-1.68299	0.0923763	0.31631
LOC100158366	46.4092	1.86525	0.851038	2.19174	0.0283983	0.172317
LOC100158370	111.934	0.119333	0.233027	0.512099	0.608582	0.813886
LOC100158382	120.602	0.127186	0.26579	0.47852	0.63228	0.828078
LOC100158389	7.08359	1.68364	2.10209	0.800938	0.423168	0.681508
LOC100158394	185.264	0.16196	0.200519	0.807702	0.419262	0.678495
LOC100158410.L	111.037	0.118141	0.329684	0.358345	0.720085	0.874934
LOC100158433.L	55.5545	0.532069	0.382144	1.39233	0.163823	0.423578
LOC100158544.S	7.83478	6.38011	4.25647	1.49892	0.133894	0.381306
LOC100170619.S	5.90196	0.585159	1.68418	0.347445	0.728257	0.879212
LOC100174801	8.8985	3.36693	1.72786	1.94861	0.0513425	0.235621
LOC100174804	292.099	-0.0180598	0.210383	-0.0858428	0.931591	0.973301
LOC100174808	11.7109	3.84745	3.5885	1.07216	0.283648	0.559954
LOC100189560	71.4898	0.0940352	0.300421	0.313011	0.754272	0.892792
LOC100189574	77.872	-0.421346	0.383255	-1.09939	0.271598	0.548738
LOC100191024	34.6537	0.554665	1.04644	0.530052	0.596076	0.806079
LOC100191026	194.598	-0.455604	0.226528	-2.01125	0.0442993	0.218443
LOC100192369	9.62461	0.161968	1.10564	0.146492	0.883533	0.95375
LOC100217319	51.3287	-0.49197	0.330319	-1.48938	0.136388	0.384751
LOC100301958	52.0187	-0.00898881	0.331247	-0.0271363	0.978351	0.991582
LOC100335021	11.7079	-1.31472	1.65851	-0.792711	0.427946	0.685129
LOC100335115	1915.15	0.608346	0.553287	1.09951	0.271545	0.548736
LOC100337617	12.401	3.09743	1.345	2.30292	0.0212834	0.148206
LOC100379118	9.06882	-2.50568	1.20092	-2.08647	0.0369361	0.198772
LOC100462904	951.88	-0.0286696	0.273628	-0.104776	0.916554	0.9675
LOC100462905	451.656	-4.06353	0.216302	-18.7864	9.7588e-79	1.01475e-74
LOC100485017.S	2.90261	3.28438	3.32834	0.986792	0.323745	1
LOC100485044.L	5.5335	0.929879	1.53098	0.607377	0.543601	1
LOC100485105.S	14.1614	2.87415	3.23262	0.889107	0.373945	0.641757
LOC100485132.L	7.15864	5.0186	3.06378	1.63804	0.101414	0.331874
LOC100485199-like.S	11.9228	0.453948	0.830475	0.546612	0.584645	0.799422
LOC100485290.L	30.7999	-0.196252	0.41386	-0.4742	0.635358	0.829913
LOC100485292.L	7.25016	1.12846	2.18444	0.516591	0.605442	0.811992
LOC100485439.L	2.03311	5.26925	3.14437	1.67577	0.0937829	1
LOC100485470.1.L	10.7362	0.463563	1.20066	0.386089	0.699431	0.864554
LOC100485504.L	1.51917	3.80954	3.26348	1.16732	0.243079	1
LOC100485669.L	12.6163	3.53423	1.39291	2.53731	0.0111708	0.100483
LOC100485723.L	2.00147	1.94475	2.43286	0.799367	0.424078	1
LOC100485767-like.S	1.63549	0.226925	2.34528	0.0967581	0.922918	1
LOC100485776.L	8.93233	6.37917	4.02373	1.58539	0.112878	0.349648
LOC100485784-like.S	2.86807	4.86332	4.18042	1.16336	0.244685	1
LOC100485829.S	4.468	2.24577	2.10129	1.06876	0.28518	1
LOC100485975.L	2.74181	0.825943	2.98824	0.276398	0.782242	1
LOC100486031.S	3.03006	3.10435	3.03592	1.02254	0.306525	1
LOC100486034.L	1.12773	2.54703	2.75677	0.923916	0.35553	1
LOC100486127.S	33.9537	1.38729	0.66996	2.0707	0.0383865	0.202857
LOC100486133.S	37.0738	0.113623	0.559477	0.203089	0.839066	0.933476
LOC100486289.L	10.5271	3.99724	1.9526	2.04714	0.0406444	0.209328
LOC100486352-like.L	3.9439	2.87684	3.19986	0.899052	0.368625	1
LOC100486352-like.S	7.27029	5.56936	2.81442	1.97886	0.0478312	0.227211
LOC100486380.L	6.48486	0.374385	1.94156	0.192827	0.847094	0.936961
LOC100486434-like.L	3.94819	3.10572	2.4488	1.26826	0.204704	1
LOC100486572.L	4.08181	4.2537	3.56148	1.19436	0.232336	1
LOC100486657.L	1.94519	1.87768	3.06916	0.611788	0.540678	1
LOC100486734-like.L	8.96526	1.00772	0.976089	1.0324	0.301883	0.577048
LOC100486734-like.S	10.7152	1.44689	1.86307	0.776617	0.437385	0.693043
LOC100486853.L	2.6885	4.86366	4.21144	1.15487	0.248144	1
LOC100486894.S	3.13632	0.562625	2.12285	0.265033	0.790984	1
LOC100486959.1	1.58617	4.58913	3.7596	1.22064	0.222222	1
LOC100486966.L	18.7266	3.39108	1.28531	2.63832	0.00833172	0.0843857
LOC100487224.L	46.066	-0.569129	0.4745	-1.19943	0.230362	0.505905
LOC100487262.S	63.5538	0.725345	0.449452	1.61384	0.106562	0.340409
LOC100487264.1	3.29504	4.86269	4.12578	1.17861	0.238552	1
LOC100487306.S	2.50312	3.23681	4.23769	0.763815	0.444978	1
LOC100487408.L	6.74805	6.61124	3.33708	1.98115	0.0475748	0.226545
LOC100487412.L	9.89607	5.39926	2.45637	2.19806	0.0279447	0.171128
LOC100487423.L	5.45231	6.06996	3.08175	1.96965	0.0488788	1
LOC100487482.S	2.69852	2.1689	2.71832	0.797882	0.424939	1
LOC100487499.S	209.472	-0.205288	0.215689	-0.951775	0.341211	0.613131
LOC100487648.1.L	4.27361	1.72727	2.47089	0.699049	0.484522	1
LOC100487668.L	9.75167	0.140865	0.818081	0.17219	0.863288	0.945021
LOC100487732	1.31082	-2.56984	4.2923	-0.598711	0.549366	1
LOC100487740.S	3.39372	2.00994	2.41525	0.832189	0.405302	1
LOC100487885.L	1.3659	3.21854	3.77582	0.85241	0.393987	1
LOC100487918.L	4.06479	5.80353	2.77218	2.09349	0.0363052	1
LOC100488087.L	18.9991	0.78835	0.61421	1.28352	0.19931	0.468819
LOC100488137.L	3.52792	4.12113	3.68739	1.11763	0.263725	1
LOC100488166.L	2.12832	5.28413	4.22672	1.25017	0.211236	1
LOC100488177.S	9.60662	4.65167	2.08093	2.23538	0.0253924	0.16345
LOC100488227.L	5.97738	3.59927	2.36666	1.52083	0.128304	0.373076
LOC100488328.L	1.40825	4.25735	3.69547	1.15205	0.249302	1
LOC100488333.L	20.0876	-0.365	0.837542	-0.435799	0.662983	0.844981
LOC100488348.S	6.58663	-0.0278545	1.26466	-0.0220253	0.982428	0.993213
LOC100488377.S	3.83553	2.02656	2.84642	0.711968	0.476484	1
LOC100488442.S	17.0079	1.57795	0.991368	1.59169	0.111455	0.347892
LOC100488486.L	4.93219	0.0579146	2.2985	0.0251967	0.979898	1
LOC100488567.L	104.745	0.276758	0.295051	0.938	0.348244	0.618873
LOC100488577.L	10.4752	2.4431	2.46772	0.990026	0.322162	0.59556
LOC100488626.L	27.8339	-2.81249	0.592527	-4.74659	2.06872e-06	0.000106667
LOC100488642.L	2.47911	4.25773	3.70953	1.14778	0.251059	1
LOC100488689.S	87.8661	-0.0106594	0.314082	-0.0339383	0.972926	0.989111
LOC100488695.S	2.77374	5.08961	4.27	1.19194	0.233283	1
LOC100488697.L	6.08107	0.906598	1.45371	0.623645	0.532861	0.762981
LOC100488701.S	6.05799	1.61149	2.50899	0.642285	0.520688	0.75485
LOC100488805.L	7.54751	6.37717	3.64674	1.74873	0.0803375	0.294735
LOC100488828.L	6.78082	4.70867	2.76799	1.70111	0.0889218	0.310485
LOC100488885-like.L	226.893	-0.0850387	0.197698	-0.430144	0.667091	0.847102
LOC100488906.L	3.29302	4.48405	3.31951	1.35081	0.176755	1
LOC100489069.S	7.24884	6.32845	2.68325	2.3585	0.0183488	0.135928
LOC100489074.L	5.63929	5.98498	3.42964	1.74507	0.080972	1
LOC100489118.L	2.57265	4.59645	4.21833	1.08964	0.275873	1
LOC100489122.L	13.2253	1.36076	1.1522	1.18101	0.2376	0.513933
LOC100489157-like.S	1.86277	2.85627	3.05208	0.935843	0.349354	1
LOC100489188.L	5.37063	-0.884321	1.44833	-0.610578	0.541479	1
LOC100489282.L	1.9537	4.59723	4.27926	1.07431	0.282686	1
LOC100489282.S	4.56043	4.30286	2.96266	1.45236	0.1464	1
LOC100489286-like.L	2.93717	4.76371	3.11309	1.53022	0.125963	1
LOC100489326.S	9.13074	1.3038	1.17621	1.10848	0.267654	0.544577
LOC100489554.L	5.11192	4.80255	2.25129	2.13324	0.0329047	1
LOC100489764.L	10.6827	3.61125	1.59228	2.26797	0.0233308	0.156081
LOC100489771.S	54.196	0.0162226	0.379194	0.0427818	0.965875	0.986074
LOC100489773-like.S	12.1365	0.12865	0.790881	0.162667	0.870781	0.948316
LOC100489832.L	1.43565	-2.01553	2.86053	-0.704602	0.481058	1
LOC100489882.L	5.24709	5.87216	3.86807	1.51811	0.128986	1
LOC100489972.L	2.5743	4.26809	4.21529	1.01253	0.311286	1
LOC100490013.L	2.7117	5.53507	2.60906	2.12148	0.0338815	1
LOC100490018.L	11.2558	2.46954	2.17942	1.13312	0.257165	0.534514
LOC100490286.S	1.45626	4.59683	4.24944	1.08175	0.279363	1
LOC100490389-like.L	5.11968	1.29732	2.52478	0.513836	0.607366	1
LOC100490462.L	5.21275	0.362722	2.46911	0.146904	0.883208	1
LOC100490530.L	48.9486	-0.915395	0.290248	-3.15383	0.0016114	0.0271277
LOC100490553.S	7.39841	6.18458	2.76049	2.24039	0.0250654	0.162327
LOC100490559.S	21.8932	0.339298	0.681349	0.49798	0.618498	0.819942
LOC100490682.1.L	8.93724	4.29767	2.25307	1.90747	0.0564598	0.24838
LOC100490725.S	2.25606	4.84846	3.30673	1.46624	0.142582	1
LOC100490741.L	27.1857	-0.320642	0.694401	-0.461754	0.644258	0.834017
LOC100490786.L	3.57601	5.40574	2.81768	1.91851	0.0550465	1
LOC100490894.S	3.16183	5.28339	4.13653	1.27725	0.201513	1
LOC100490918.L	7.30465	2.82098	2.1327	1.32272	0.185927	0.450555
LOC100490937.L	1.45447	1.36549	2.49731	0.546783	0.584528	1
LOC100490989.L	5.43779	5.32623	3.50153	1.52111	0.128231	1
LOC100491090.L	2.26466	4.57749	3.28704	1.39258	0.163745	1
LOC100491107.L	1.72245	5.32765	4.00775	1.32934	0.183737	1
LOC100491114.S	3.4949	5.27667	3.54638	1.48791	0.136776	1
LOC100491211.L	15.1033	3.63524	1.90546	1.9078	0.0564169	0.248261
LOC100491220.L	1.51596	4.26923	4.2874	0.995762	0.319366	1
LOC100491357.S	6.6694	6.19289	3.363	1.84148	0.0655516	0.266538
LOC100491389.L	5.91316	6.37149	3.01016	2.11666	0.0342886	0.191828
LOC100491404.S	2.21342	4.15442	3.70154	1.12235	0.261713	1
LOC100491437-like.L	16.3937	-1.46597	1.48314	-0.988426	0.322944	0.596144
LOC100491437-like.S	4.08562	4.15323	3.16847	1.3108	0.189925	1
LOC100491450.S	13.5292	1.43955	1.24481	1.15644	0.247503	0.524124
LOC100491454.L	3.9427	0.352822	2.03565	0.173322	0.862398	1
LOC100491454.S	2.9181	4.31752	3.74167	1.1539	0.248541	1
LOC100491587.L	6.18931	4.12232	3.01937	1.36529	0.172162	0.433784
LOC100491587.S	4.97618	5.98013	3.04792	1.96204	0.0497578	1
LOC100491616-like.L	14.496	0.919579	1.10687	0.830795	0.40609	0.667624
LOC100491629.S	7.3302	3.86713	2.31551	1.6701	0.0949	0.320618
LOC100491824.S	5.79235	3.74329	3.11658	1.20109	0.229716	1
LOC100491907.S	3.11118	1.04246	1.64916	0.632113	0.527313	1
LOC100491930.L	3.66307	4.20657	2.31302	1.81864	0.0689656	1
LOC100491939.S	113.763	0.236872	0.327098	0.724162	0.468966	0.717902
LOC100491961.S	2.13102	5.47076	3.60757	1.51647	0.129402	1
LOC100491966.1.L	7.79389	6.29329	2.91608	2.15814	0.0309173	0.180812
LOC100492080.1	1.98524	3.28486	3.34632	0.981635	0.32628	1
LOC100492152.L	1.52262	0.679599	3.86027	0.176049	0.860255	1
LOC100492197-like.L	200.127	-0.387829	0.234996	-1.65036	0.0988689	0.327261
LOC100492376.L	1.69552	4.26921	4.2874	0.995758	0.319368	1
LOC100492420.S	15.612	2.9088	1.33745	2.17488	0.0296393	0.176364
LOC100492487.S	60.7597	-0.221763	0.305167	-0.726695	0.467413	0.71688
LOC100492546-like.S	3.90746	3.74517	2.18132	1.71693	0.0859918	1
LOC100492639-like.S	7.10719	1.5365	1.52379	1.00834	0.313289	0.587747
LOC100492643.L	1.65413	1.66871	2.17153	0.768448	0.442221	1
LOC100492708	27.9103	0.752093	0.64603	1.16418	0.244352	0.520633
LOC100492859.S	4.47331	2.94347	1.9481	1.51094	0.130803	1
LOC100492885.L	81.2207	0.775838	0.558615	1.38886	0.164875	0.424818
LOC100492888-like.L	20.7953	1.72702	0.926791	1.86344	0.0624007	0.260516
LOC100492899.L	3.29309	0.673373	2.25549	0.298548	0.765285	1
LOC100492951-like.S	135.137	-1.69834	0.277336	-6.12377	9.1384e-10	9.93283e-08
LOC100492960.S	1.75002	5.08328	3.7143	1.36857	0.171133	1
LOC100493020.L	2.6004	4.56875	2.9681	1.53928	0.123735	1
LOC100493071.L	44.6537	5.78633	3.31618	1.74488	0.0810063	0.295971
LOC100493076.L	4.07194	0.576459	2.53125	0.227737	0.819851	1
LOC100493184.L	17.4577	6.8754	2.01667	3.40928	0.000651339	0.013738
LOC100493194.L	10.8198	4.64599	2.36641	1.96331	0.0496106	0.231712
LOC100493237.L	1.98126	1.36671	2.60519	0.52461	0.599855	1
LOC100493256-like.L	4.91748	4.1262	2.6421	1.56171	0.118355	1
LOC100493256-like.S	2.479	4.2582	3.728	1.14222	0.253362	1
LOC100493283-like.L	37.3803	0.43799	0.643609	0.680522	0.496174	0.738644
LOC100493356.L	11.2001	7.29787	2.50946	2.90815	0.00363579	0.0483867
LOC100493356.S	6.35194	5.06571	2.40334	2.10778	0.0350503	0.194105
LOC100493381.L	7.14526	6.81414	3.31462	2.05578	0.0398036	0.207118
LOC100493382.L	60.5282	-0.441365	0.559825	-0.788398	0.430464	0.687276
LOC100493422.S	2.98434	3.18882	3.28958	0.969372	0.33236	1
LOC100493447.L	2.04298	2.85231	3.35325	0.850612	0.394985	1
LOC100493447.S	1.83394	2.18047	3.78563	0.575985	0.564625	1
LOC100493463.L	3.66254	2.63346	3.23804	0.813288	0.416053	1
LOC100493498.L	1.96908	1.48167	3.35824	0.441204	0.659065	1
LOC100493512.1	4.15979	2.11339	2.52834	0.835881	0.403222	1
LOC100493549.L	5.33207	6.09257	3.38566	1.79952	0.0719361	1
LOC100493618.L	4.45362	3.18815	3.20976	0.993266	0.32058	1
LOC100493672.L	3.9166	2.68054	2.92288	0.917089	0.359096	1
LOC100493742.1	12.4744	6.61289	2.52058	2.62356	0.00870166	0.0866694
LOC100493745.L	206.755	-0.153503	0.192657	-0.796768	0.425586	0.683281
LOC100493773.L	1.96941	3.84421	4.30103	0.893788	0.371435	1
LOC100493778.L	2.66203	5.08861	4.16117	1.22288	0.221375	1
LOC100493912.S	22.4095	0.358658	0.960485	0.373414	0.708841	0.869157
LOC100493955.L	7.00276	2.06167	2.60088	0.792682	0.427963	0.685129
LOC100493956.S	5.46971	6.29008	3.81314	1.64958	0.099029	1
LOC100493968.1.L	9.39478	0.528594	0.919836	0.57466	0.565521	0.785204
LOC100494033.L	25.1979	3.85692	2.23675	1.72434	0.0846457	0.302848
LOC100494136.L	10.9009	4.12709	2.19043	1.88415	0.0595452	0.254768
LOC100494386.L	10.268	0.172595	0.791041	0.218188	0.827283	0.927454
LOC100494454.S	4.21003	5.7364	3.10251	1.84895	0.0644647	1
LOC100494476.L	31.5122	-0.667977	0.618662	-1.07971	0.28027	0.556882
LOC100494536.S	4.96096	4.94077	2.59237	1.90588	0.0566652	1
LOC100494571.S	3.39589	5.74314	3.61075	1.59057	0.111707	1
LOC100494592.L	1.05434	0	3.63099	0	1	1
LOC100494604.L	9.23025	7.10285	4.25277	1.67017	0.0948851	0.320618
LOC100494615.S	1.50519	3.84421	4.30103	0.893789	0.371435	1
LOC100494832.S	1.52377	4.25859	3.74441	1.13732	0.255405	1
LOC100494870.L	2.86725	4.9043	3.25609	1.50619	0.132018	1
LOC100494943.L	4.90274	5.98554	3.4867	1.71668	0.0860378	1
LOC100494970.S	2.06115	4.85688	3.7144	1.30758	0.191015	1
LOC100495010.S	84.2058	0.102661	0.326745	0.314192	0.753375	0.892306
LOC100495012.L	3.60493	3.7357	3.28931	1.13571	0.256078	1
LOC100495012.S	7.74418	6.68477	2.73786	2.4416	0.0146222	0.117957
LOC100495079.L	4.12	5.72479	2.75089	2.08107	0.0374274	1
LOC100495096.1	3.36839	2.11619	1.43357	1.47616	0.1399	1
LOC100495101.S	3.12757	5.50909	3.17408	1.73565	0.082626	1
LOC100495179.L	10.3056	0.733485	1.56168	0.469676	0.638586	0.831214
LOC100495179.S	2.35048	4.2569	3.6774	1.15758	0.247033	1
LOC100495222.1.L	10.0548	3.11598	1.97232	1.57985	0.11414	0.351613
LOC100495284.L	1.35267	2.00091	3.67161	0.544969	0.585775	1
LOC100495333.S	3.57185	3.24696	3.25392	0.99786	0.318347	1
LOC100495347.1	2.76673	4.2712	2.92036	1.46256	0.143588	1
LOC100495360.L	2.9631	5.08241	3.65412	1.39087	0.164264	1
LOC100495379.L	4.18712	2.84268	2.03368	1.3978	0.162174	1
LOC100495541.1.L	2.21588	4.85662	3.69898	1.31296	0.189195	1
LOC100495655-like.S	3.98023	5.73672	3.12121	1.83798	0.0660657	1
LOC100495801-like.L	2.56993	3.72513	2.94124	1.26651	0.205329	1
LOC100495841.L	2.3785	3.30414	3.23307	1.02198	0.306789	1
LOC100495874.L	6.15202	6.37522	3.37684	1.88792	0.0590361	0.253713
LOC100495886.1.S	5.73021	5.01465	3.33037	1.50573	0.132136	1
LOC100495895.S	47.212	-0.10912	0.328356	-0.332321	0.739647	0.885775
LOC100495966	1.62233	4.17846	2.91013	1.43583	0.15105	1
LOC100496010.S	14.4818	1.94332	0.935486	2.07734	0.0377699	0.200789
LOC100496035.L	1.35349	3.21831	3.77081	0.853479	0.393394	1
LOC100496074-like.L	4.09518	1.2006	1.28421	0.934895	0.349843	1
LOC100496137-like.L	25.3416	-0.188306	0.739896	-0.254503	0.799107	0.914191
LOC100496293.L	11.9659	3.40745	2.34283	1.45442	0.14583	0.398678
LOC100496329.L	1.26472	-0.821375	3.84832	-0.213438	0.830986	1
LOC100496329.S	7.20017	-1.96186	1.83939	-1.06658	0.28616	0.562121
LOC100496462.L	10.9452	0.103539	0.846201	0.122357	0.902616	0.961087
LOC100496618.L	8.09017	2.01115	2.44019	0.824176	0.40984	0.670879
LOC100496658.L	17.1055	1.04616	1.05564	0.991025	0.321673	0.595419
LOC100496716.L	27.4167	0.586896	0.64613	0.908325	0.363707	0.633362
LOC100496797-like.L	93.2026	0.101938	0.335302	0.304018	0.761114	0.896235
LOC100496797.L	321.136	0.535309	0.206789	2.58867	0.00963473	0.0918183
LOC100496837.S	9.16408	3.11406	1.49676	2.08054	0.0374763	0.200081
LOC100496844.L	8.95411	2.95707	1.81141	1.63247	0.102581	0.333786
LOC100496853.L	1.81137	4.59723	4.27926	1.0743	0.282686	1
LOC100496870.L	5.98763	1.14752	1.9855	0.577951	0.563297	0.783453
LOC100496873.L	8.77536	1.02999	1.60875	0.640241	0.522016	0.755476
LOC100496891.S	4.22778	0.0796882	2.17141	0.0366989	0.970725	1
LOC100496975.L	3.89892	3.91458	3.18298	1.22985	0.218754	1
LOC100496975.S	38.083	1.19295	0.536233	2.22468	0.0261024	0.165901
LOC100497020.L	11.3718	0.692154	1.00478	0.688864	0.490909	0.734868
LOC100497066.L	10.8626	7.20269	4.25238	1.6938	0.0903034	0.312683
LOC100497184.L	198.647	0.0236765	0.214102	0.110585	0.911945	0.965104
LOC100497185.L	1.41483	1.50743	2.48057	0.607697	0.543388	1
LOC100497185.S	1.8697	1.40374	2.7068	0.518599	0.60404	1
LOC100497299.1.L	1.58287	5.08226	3.64588	1.39397	0.163326	1
LOC100497309.L	17.0592	2.17926	1.36726	1.59388	0.110962	0.347362
LOC100497429.S	2.72739	4.59609	4.19144	1.09654	0.272841	1
LOC100497432.L	1.78886	4.25761	3.7049	1.14918	0.250481	1
LOC100497489.S	9.38668	0.788399	1.08034	0.729771	0.46553	0.715565
LOC100497500.S	13.0708	2.3089	1.4016	1.64733	0.0994907	0.32825
LOC100497501.L	3.23865	6.00185	2.78926	2.15177	0.0314154	1
LOC100497556.L	15.7763	1.0315	0.966637	1.0671	0.285928	0.562011
LOC100497626.L	1.5754	4.2594	3.778	1.12742	0.259563	1
LOC100497703.S	10.5895	1.05321	1.72705	0.609831	0.541974	0.769054
LOC100497709.L	8.66346	1.37335	1.79306	0.765926	0.44372	0.697991
LOC100497740.L	1.51447	0.947861	2.32117	0.408354	0.683014	1
LOC100497794.S	1.97358	5.28421	4.23745	1.24703	0.212387	1
LOC100497848.L	3.13719	4.36732	2.16616	2.01615	0.0437839	1
LOC100497909.S	101.801	2.65965	0.897858	2.96221	0.00305436	0.0428614
LOC100497953.L	14.5754	-0.745894	1.24436	-0.599422	0.548892	0.773915
LOC100498166.L	1.67776	4.11055	3.02568	1.35855	0.174288	1
LOC100498173.S	4.63241	4.20247	3.17103	1.32527	0.185082	1
LOC100498184.L	3.00782	5.54519	3.14165	1.76506	0.0775541	1
LOC100498204.L	2.54618	4.86388	4.23176	1.14937	0.250402	1
LOC100498247.S	1.396	-0.056236	3.27744	-0.0171585	0.98631	1
LOC100498327.L	21.1876	1.21851	0.929793	1.31051	0.190022	0.456682
LOC100498441.1.L	3.18876	5.07237	3.15018	1.61018	0.107358	1
LOC100498450.S	1.84423	-1.02129	2.02542	-0.504236	0.614096	1
LOC100498474.S	6.6878	4.95172	2.38023	2.08036	0.0374926	0.200134
LOC100498477.L	3.86622	6.02299	2.40117	2.50836	0.0121294	1
LOC100498517.L	20.0319	-0.488135	0.597302	-0.817233	0.413795	0.673764
LOC100498590.S	2.9169	3.24752	3.27667	0.991105	0.321634	1
LOC100498594.S	2.2365	1.74697	2.85719	0.611431	0.540914	1
LOC100505442	125.736	0.299363	0.241864	1.23773	0.215815	0.488099
LOC100505446	258.977	-0.401011	0.239278	-1.67592	0.0937542	0.318359
LOC100653495	116.14	-0.221477	0.233464	-0.948657	0.342795	0.614458
LOC100653497	62.1841	-0.0782844	0.411454	-0.190263	0.849103	0.937414
LOC100653500	11.8604	2.25173	0.989879	2.27475	0.022921	0.154123
LOC100653501	8.30774	2.80432	1.91974	1.46078	0.144076	0.396132
LOC100653508	152.934	0.0624999	0.281123	0.222323	0.824063	0.926354
LOC100653509	532.408	0.0892959	0.245425	0.363842	0.715976	0.872738
LOC101027262	5.45188	6.04323	3.11677	1.93894	0.0525086	1
LOC101027264	21.5028	-0.0218126	0.581106	-0.0375364	0.970057	0.988112
LOC101027269	27.9249	0.952893	0.485938	1.96093	0.0498867	0.232653
LOC101027274	6.82156	6.53637	3.29715	1.98243	0.0474309	0.226157
LOC101027275	1.65993	3.8442	4.30103	0.893787	0.371436	1
LOC101027277	604.326	-0.701844	0.223776	-3.13637	0.00171052	0.028413
LOC101027278	706.319	-0.755449	0.190504	-3.96553	7.32344e-05	0.00232169
LOC101027283	2.28053	3.23693	4.24148	0.763159	0.445368	1
LOC101027285	596.982	0.0115273	0.231211	0.0498561	0.960237	0.984332
LOC101027288	335.63	0.226706	0.204833	1.10678	0.268389	0.545368
LOC101027289	22.2364	21.5717	4.25133	5.07411	3.89318e-07	2.42685e-05
LOC101027292	42.1398	0.391678	0.586482	0.667843	0.504234	0.743442
LOC101027296	0.894407	-0.516715	2.74033	-0.18856	0.850438	1
LOC101027307	9.12883	2.1819	1.91272	1.14073	0.253981	0.531277
LOC101027309	218.079	-0.965814	0.231906	-4.16468	3.11783e-05	0.0011257
LOC101243550	95.9987	0.0410592	0.336314	0.122086	0.902831	0.961157
LOC101243553	24.411	1.70535	0.889215	1.91782	0.0551339	0.245105
LOC101243554	27.6667	0.640141	0.908469	0.704638	0.481036	0.727665
LOC101730276.L	11.5147	1.67536	1.11599	1.50122	0.133298	0.380606
LOC101730283.S	2.38979	5.08927	4.23152	1.2027	0.229091	1
LOC101730314.L	123.134	2.7683	0.296018	9.3518	8.61655e-21	3.63234e-18
LOC101730464.L	19.4541	6.32984	2.88027	2.19766	NA	1
LOC101730467.L	1.6384	1.7275	4.38265	0.394167	0.693458	1
LOC101730503.L	1.48877	1.36135	2.6412	0.515428	0.606254	1
LOC101730584	1.89409	3.21346	3.67448	0.874534	0.381827	1
LOC101730652.S	6.13658	0.50026	1.52009	0.3291	0.74208	0.887078
LOC101730692.L	9.7257	3.55434	1.44906	2.45286	0.0141725	0.116161
LOC101730710.L	2.40124	3.51987	2.71094	1.29839	0.194152	1
LOC101730711.S	23.8604	0.0625339	0.474644	0.131749	0.895183	0.958097
LOC101730741.L	4.98688	1.39574	2.08544	0.669279	0.503317	1
LOC101730756.S	2.76602	5.73765	3.17858	1.8051	0.0710593	1
LOC101730771-like.L	11.3012	7.33654	2.47805	2.96061	0.00307032	0.0430272
LOC101730771-like.S	3.42072	5.74296	3.59345	1.59818	0.110004	1
LOC101730807.L	9.13302	3.96851	2.1384	1.85583	0.0634774	0.262345
LOC101730829.L	2.38397	3.84345	4.26436	0.901296	0.367431	1
LOC101730888-like.L	4.33767	1.90472	2.85135	0.668006	0.504129	1
LOC101730911.S	5.8664	2.16326	3.4553	0.626072	0.531268	0.762052
LOC101730997.L	2.30332	1.55082	2.33643	0.663758	0.506845	1
LOC101730999.S	3.35695	3.65346	2.6199	1.3945	0.163167	1
LOC101731079.L	6.88665	6.90509	2.32083	2.97527	0.00292734	0.0416408
LOC101731168.L	5.58304	5.74512	3.82609	1.50157	0.133209	1
LOC101731180.S	1.69127	-0.230511	3.38294	-0.0681394	0.945675	1
LOC101731218.L	3.24313	3.993	2.77466	1.4391	0.150123	1
LOC101731218.S	29.0383	0.0363263	0.50136	0.0724556	0.942239	0.977222		X
LOC101731372.S	8.40743	3.7686	2.09217	1.80128	0.0716584	0.278657
LOC101731405.L	17.0575	0.0470562	0.686061	0.0685889	0.945317	0.978341
LOC101731405.S	8.71573	2.95596	1.41143	2.0943	0.0362332	0.19727
LOC101731429.L	1.59693	4.85719	3.73316	1.30109	0.193226	1
LOC101731434.L	2.26153	4.86418	4.26028	1.14175	0.253558	1
LOC101731454.L	3.28299	1.70481	1.96076	0.869466	0.384592	1
LOC101731502.L	3.57424	5.58786	2.74222	2.03772	0.0415784	1
LOC101731502.S	3.59957	5.45468	4.07508	1.33855	0.180719	1
LOC101731543-like.S	4.09067	5.0799	3.50114	1.45093	0.1468	1
LOC101731554.S	1.64587	4.26923	4.2874	0.995763	0.319365	1
LOC101731617.L	7.41161	5.02094	1.90098	2.64124	0.00826037	0.0839083
LOC101731617.S	6.8917	4.99981	2.02173	2.47304	0.013397	0.112253
LOC101731668.S	7.81315	5.85912	2.84861	2.05684	0.0397021	0.206797
LOC101731680.S	1.58452	4.8571	3.72739	1.30308	0.192547	1
LOC101731692.S	6.32689	5.25102	2.78991	1.88215	0.0598161	0.255436
LOC101731719.S	3.49693	3.87779	3.01165	1.2876	0.197887	1
LOC101731735.L	12.4238	0.995722	0.812213	1.22594	0.220222	0.493309
LOC101731735.S	24.2249	0.666185	0.596699	1.11645	0.26423	0.540998
LOC101731753.L	4.0007	2.66522	2.3363	1.14078	0.25396	1
LOC101731778.L	1.39471	2.52556	3.0446	0.82952	0.40681	1
LOC101731794.L	4.29594	4.93125	2.75002	1.79317	0.0729462	1
LOC101731854.L	5.92034	5.66153	2.49024	2.27349	0.0229969	0.154543
LOC101731916.L	1.9288	3.06848	3.78173	0.811397	0.417138	1
LOC101731950.L	3.63534	4.62735	3.56827	1.29681	0.194697	1
LOC101731963.L	6.52818	5.76902	2.34054	2.46483	0.013708	0.11382
LOC101731968.1.L	8.63319	6.8102	2.85624	2.38432	0.0171105	0.129901
LOC101731968.S	1.98182	3.84354	4.26938	0.900258	0.367983	1
LOC101732121.S	2.91631	5.07181	3.12886	1.62097	0.105023	1
LOC101732152.S	2.69927	5.08903	4.20483	1.21028	0.226171	1
LOC101732167.L	3.84769	5.7428	3.57754	1.60524	0.108441	1
LOC101732168.S	3.15595	1.65297	1.77229	0.932676	0.350987	1
LOC101732174.L	5.18358	0.112891	2.05364	0.0549714	0.956161	1
LOC101732183.L	13.654	-0.0864841	0.760337	-0.113744	0.90944	0.963993
LOC101732265-like.L	2.41002	1.67905	2.607	0.644055	0.51954	1
LOC101732299.L	11.7811	1.0269	0.994446	1.03264	0.301772	0.577048
LOC101732303.L	1.52049	3.23964	4.32855	0.748436	0.454197	1
LOC101732334	6.52137	2.86739	2.10513	1.3621	0.173167	0.435229
LOC101732336.L	6.95105	1.1104	1.02581	1.08246	0.279047	0.555725
LOC101732363.S	11.0015	1.3705	0.894757	1.5317	0.125596	0.369627
LOC101732392.L	3.12686	4.87026	2.78725	1.74733	0.0805799	1
LOC101732415.L	2.09932	3.84421	4.30103	0.893789	0.371435	1
LOC101732478.S	4.8525	6.19359	3.44042	1.80024	0.0718225	1
LOC101732545.L	2.09602	4.59724	4.27926	1.07431	0.282686	1
LOC101732646	18.2269	0.519703	0.565398	0.919182	0.358001	0.628156
LOC101732656.L	3.93099	4.58527	3.57666	1.282	0.199844	1
LOC101732657.1.S	2.23128	1.83934	2.6702	0.688841	0.490924	1
LOC101732657.L	2.36481	4.2437	3.26877	1.29826	0.1942	1
LOC101732678.L	4.03896	5.4542	4.01756	1.35759	0.174594	1
LOC101732737.L	5.62436	5.98457	3.39015	1.76528	0.0775163	1
LOC101732752.S	5.00881	5.61061	2.81677	1.99186	0.0463867	1
LOC101732807.L	120.767	-1.23479	0.24475	-5.0451	4.5328e-07	2.75635e-05
LOC101732820.L	3.2901	5.45496	4.11117	1.32686	0.184554	1
LOC101732837.L	10.7059	1.48621	1.29689	1.14598	0.251804	0.5289
LOC101732880.S	6.04429	2.40575	1.4604	1.64732	0.0994926	0.32825
LOC101732886.L	11.3027	7.37203	2.52537	2.91919	0.00350942	0.0473051
LOC101732896.L	2.4216	4.44712	3.31105	1.34312	0.179235	1
LOC101732896.S	3.12624	5.08842	4.1414	1.22867	0.219195	1
LOC101732913.L	3.64149	5.08081	3.554	1.4296	0.152831	1
LOC101732945.L	37.207	-0.218161	1.53031	-0.14256	0.886637	0.954998
LOC101732960.S	1.38236	2.85196	3.24273	0.879494	0.379134	1
LOC101732961.L	1.74949	4.22407	2.87896	1.46722	0.142316	1
LOC101732999.S	5.44644	6.68209	3.33002	2.00662	0.0447899	1
LOC101733006.L	3.95211	5.98936	3.98686	1.50227	0.133026	1
LOC101733023.S	6.35259	2.07158	2.16363	0.957459	0.338336	0.610574
LOC101733058.L	2.784	3.29696	3.74999	0.879191	0.379298	1
LOC101733073.L	3.82287	5.74281	3.57848	1.60482	0.108534	1
LOC101733100.L	5.5273	5.27439	3.40254	1.55013	0.121109	1
LOC101733142.L	5.66826	2.64197	2.0903	1.26392	0.20626	1
LOC101733157.L	6.05606	4.40151	1.86497	2.3601	0.0182702	0.135474
LOC101733178.L	28.012	0.146176	0.578606	0.252636	0.80055	0.914708
LOC101733219.L	4.07998	4.24015	2.90514	1.45953	0.144418	1
LOC101733219.S	2.18226	4.07744	3.21037	1.27008	0.204055	1
LOC101733221.L	8.97006	2.58443	1.76273	1.46615	0.142606	0.394002
LOC101733232.S	8.73965	-1.13942	0.95156	-1.19742	0.231142	0.506798
LOC101733276.L	2.97922	4.25479	3.59953	1.18204	0.23719	1
LOC101733340.1.L	4.35753	6.04293	3.09449	1.95281	0.0508424	1
LOC101733340.S	5.82993	5.98408	3.345	1.78896	0.0736211	1
LOC101733353.L	2.288	4.59646	4.22008	1.08919	0.27607	1
LOC101733361.L	2.20947	0.708602	2.26301	0.313124	0.754186	1
LOC101733386.L	1.34408	3.28566	3.36872	0.975342	0.329391	1
LOC101733399.1.L	4.64055	-1.24316	1.85892	-0.668755	0.503652	1
LOC101733436.L	1.20391	1.0754	2.95283	0.364195	0.715712	1
LOC101733491.L	4.3939	5.26765	3.07569	1.71267	0.0867728	1
LOC101733491.S	4.11835	3.7832	2.90764	1.30112	0.193217	1
LOC101733496-like.L	64.226	-0.444281	0.340307	-1.30553	0.191713	0.458768
LOC101733559.L	92.8664	-0.594638	0.283419	-2.09808	0.0358977	0.196323
LOC101733560.1.S	595.272	3.39448	1.55196	2.18723	NA	1
LOC101733570.S	1.29132	3.32473	2.33736	1.42243	0.154902	1
LOC101733572.S	11.0312	1.92189	1.08557	1.7704	0.0766598	0.289236
LOC101733597.1.S	8.17074	0.893509	1.55386	0.575027	0.565273	0.785081
LOC101733619.S	2.84757	5.13042	3.58792	1.42992	0.152741	1
LOC101733718-like.L	4.85888	-0.102324	1.36337	-0.0750527	0.940173	1
LOC101733732.L	1.957	3.84421	4.30103	0.893789	0.371435	1
LOC101733745.L	2.76365	4.25754	3.70177	1.15014	0.250088	1
LOC101733806.L	2.67969	3.01605	3.1477	0.958177	0.337974	1
LOC101733839.L	1.86469	3.89665	3.81073	1.02255	0.306522	1
LOC101733845.L	3.66975	3.10034	3.25593	0.952213	0.340989	1
LOC101733845.S	10.5392	0.848468	2.07042	0.409805	0.681949	0.855181
LOC101733888.L	7.68986	3.16077	2.10394	1.50231	0.133017	0.380234
LOC101733890.L	3.4746	4.86224	4.08811	1.18936	0.234297	1
LOC101733911.L	19.952	4.25039	1.57799	2.69355	0.00706956	0.0757852
LOC101733911.S	30.6019	5.9276	1.78212	3.32616	0.000880527	0.0171675
LOC101734037.S	2.82773	3.88801	3.36068	1.15691	0.247308	1
LOC101734090.L	7.22855	4.70454	3.0299	1.5527	0.120494	0.361528
LOC101734106.S	1.53332	1.72684	4.259	0.405456	0.685142	1
LOC101734116.1.L	5.92641	0.479365	1.79041	0.267741	0.788899	0.909604
LOC101734172.L	8.10433	2.27579	1.93482	1.17623	0.239503	0.51579
LOC101734194.L	3.55468	5.67041	2.76654	2.04964	0.0403998	1
LOC101734280.L	14.3215	0.656025	0.869495	0.75449	0.450555	0.703105
LOC101734280.S	9.85944	1.79164	1.24618	1.4377	0.150519	0.405828
LOC101734284-like.L	5.07625	0.215442	1.43419	0.150219	0.880592	1
LOC101734409.S	6.9377	4.33521	2.68255	1.61608	0.106078	0.339498
LOC101734474.S	1.68502	-0.264832	1.75627	-0.150792	0.88014	1
LOC101734516.L	16.2684	-0.201534	0.632571	-0.318595	0.750034	0.890952
LOC101734522.1	6.62224	2.02512	1.79673	1.12711	0.259695	0.536894
LOC101734545	8.82464	6.541	4.15381	1.5747	0.115326	0.353295
LOC101734588.L	6.52017	3.57846	2.52696	1.41611	0.156743	0.414019
LOC101734593.L	3.01621	5.60864	4.13729	1.35563	0.175217	1
LOC101734593.S	1.47872	4.2691	4.28027	0.997391	0.318575	1
LOC101734605.L	39.3707	1.07607	0.382088	2.8163	0.00485808	0.0593248
LOC101734608.L	2.45615	2.05837	2.64632	0.777822	0.436674	1
LOC101734609.L	3.10048	5.60431	3.63844	1.5403	0.123486	1
LOC101734609.S	2.98339	5.44932	3.55677	1.5321	0.125498	1
LOC101734643.L	6.03447	2.27664	1.77257	1.28437	0.199011	0.468373	X
LOC101734660.L	2.3804	4.11543	3.36096	1.22448	0.220771	1
LOC101734679.L	3.52064	5.19608	3.62258	1.43436	0.151469	1
LOC101734771.L	1.56682	0.896439	3.22385	0.278065	0.780963	1
LOC101734788.S	3.05726	5.0743	3.22818	1.57188	0.115979	1
LOC101734852.S	1.24641	4.9117	3.46682	1.41677	0.156549	1
LOC101734868.L	2.78069	-0.102902	2.71714	-0.0378714	0.96979	1
LOC101734868.S	5.29773	4.97986	2.80663	1.77432	0.0760099	1
LOC101734895.1	1.64321	3.50205	3.35175	1.04484	0.296096	1
LOC101734975.L	1.82708	3.84408	4.29536	0.894938	0.37082	1
LOC101734975.S	2.53144	5.45008	3.61686	1.50685	0.131849	1
LOC101734998.L	2.65621	3.84233	4.21245	0.912137	0.361696	1
LOC101734999.S	86.4712	-0.701418	0.361379	-1.94095	0.0522648	0.238
LOC101735002.S	2.51535	5.26659	3.05159	1.72585	0.0843745	1
LOC101735009.S	45.5705	0.939898	0.480393	1.95652	0.0504042	0.23377
LOC101735010.S	3.46245	1.11873	2.15221	0.519805	0.6032	1
LOC101735011.L	2.15711	4.25877	3.75135	1.13526	0.256266	1
LOC101735056.L	36.6619	-0.287673	0.620849	-0.463354	0.64311	0.833417
LOC101735082.S	4.39705	4.11153	3.18713	1.29004	0.197036	1
LOC101735116.L	2.00369	3.18615	3.25615	0.978504	0.327825	1
LOC101735121-like.L	41.4887	-0.452025	0.466825	-0.968296	0.332896	0.605599
LOC101735124-like.S	12.2564	0.50691	0.953499	0.531631	0.594982	0.80529
LOC101735245.L	4.07522	5.27682	3.55666	1.48365	0.137903	1
LOC101735282.L	3.88514	5.52426	2.07864	2.65763	0.00786923	1
LOC101735289.L	5.4796	5.60601	3.80754	1.47235	0.140928	1
LOC101735296.L	1.24146	1.85908	4.20771	0.441827	0.658614	1
LOC105945196.S	6.72032	6.07798	2.54221	2.39083	0.0168104	0.128688
LOC105945384.S	2.93719	2.49043	2.48629	1.00167	0.316505	1
LOC105945417.L	30.2889	0.433192	0.721761	0.600188	0.548381	0.773502
LOC105945479	2.68665	1.87546	3.32626	0.563835	0.572866	1
LOC105945545.L	5.94751	1.19757	1.57117	0.762217	0.44593	0.699515
LOC105945779	4.1263	2.77153	2.88759	0.959805	0.337153	1
LOC105945780.L	32.8065	2.11151	0.967146	2.18324	0.0290181	0.174566
LOC105945786.L	5.92327	5.57292	3.11121	1.79124	0.0732555	0.281811
LOC105945872.L	6.07786	4.70361	2.59623	1.81171	0.070031	0.275275
LOC105945929.L	3.80299	5.27734	3.59249	1.469	0.141834	1
LOC105946022.S	25.677	2.50181	1.11093	2.252	0.0243224	0.159701
LOC105946344.L	10.3085	3.82746	2.46544	1.55244	0.120556	0.361646
LOC105946425.L	4.65031	3.70797	2.90923	1.27455	0.202467	1
LOC105946653.L	1.52343	5.08902	4.20778	1.20943	0.226497	1
LOC105946688.L	42.1392	-0.854261	0.582886	-1.46557	0.142765	0.394274
LOC105946688.S	5.33022	0.456538	1.67978	0.271784	0.785788	1
LOC105946711.L	3.83506	4.4539	3.59209	1.23992	0.215005	1
LOC105946830.L	8.68573	3.87856	2.45271	1.58134	0.113801	0.351245
LOC105946874.L	2.68298	0.0790704	1.88226	0.0420082	0.966492	1
LOC105946897.L	13.5207	3.46623	3.06929	1.12933	0.25876	0.535952
LOC105946907.L	4.73173	6.24969	3.04058	2.05543	0.0398376	1
LOC105946937.L	5.61136	4.89978	3.03888	1.61236	0.106883	1
LOC105947003.L	12.9785	2.36015	1.37227	1.71989	0.0854533	0.30382
LOC105947173.L	7.44063	6.51868	2.94703	2.21195	0.0269702	0.16781
LOC105947229.L	10.0249	1.75618	1.61008	1.09074	0.275388	0.552495
LOC105947339.L	1.70235	-3.09741	2.42173	-1.27901	0.200894	1
LOC105947410.L	38.4949	0.0736826	0.51383	0.143399	0.885975	0.954911
LOC105947422.S	1.69841	1.71902	3.24518	0.529713	0.596311	1
LOC105947450.S	50.6365	-0.526783	0.332469	-1.58446	0.11309	0.349984
LOC105947595.L	7.25835	5.73185	2.87555	1.99331	0.0462279	0.223061
LOC105947790.L	13.0058	-2.6415	1.02765	-2.57043	0.0101571	0.0949227
LOC105947790.S	2.87554	0.0991522	1.93917	0.0511313	0.959221	1
LOC105947835.S	4.1594	5.13702	2.53492	2.0265	0.0427136	1
LOC105947871.L	21.3428	-0.0272216	0.537851	-0.0506118	0.959635	0.984193
LOC105948127	5.91965	5.73038	2.21508	2.58698	0.00968204	0.0919498
LOC105948388.L	2.60299	1.98757	3.3541	0.59258	0.553462	1
LOC105948534	2.60481	3.60017	2.89342	1.24426	0.213403	1
LOC105948557.L	2.79556	1.45641	2.2316	0.652633	0.513993	1
LOC108695208	2.64815	5.07485	3.25189	1.56058	0.118622	1
LOC108695213	5.12756	1.58609	2.27143	0.698279	0.485003	1
LOC108695214	4.02253	1.59022	1.75238	0.90746	0.364163	1
LOC108695215	4.59917	4.39296	2.92592	1.50139	0.133254	1
LOC108695216	2.0951	0.563916	2.57299	0.219168	0.826519	1
LOC108695217	37.0879	0.232556	0.404553	0.574847	0.565395	0.785204
LOC108695218	3.12795	-0.108613	2.38453	-0.0455491	0.96367	1
LOC108695220	5.20739	6.13148	2.41709	2.53672	0.0111896	1
LOC108695221	35.6177	1.18325	0.610931	1.9368	0.0527692	0.239148
LOC108695222	1.70271	0	4.27038	0	1	1
LOC108695223	7.57103	-0.144404	1.49786	-0.0964068	0.923197	0.969829
LOC108695227	216.825	-0.716587	0.258568	-2.77136	0.00558224	0.0647594
LOC108695228	1.94903	1.1872	2.04221	0.58133	0.561018	1
LOC108695232	93.505	-0.345698	0.35575	-0.971744	0.331178	0.603593
LOC108695237	34.8896	-0.969892	0.390537	-2.48348	0.0130104	0.110049
LOC108695239	9.59285	0.846145	0.858365	0.985763	0.324249	0.597105
LOC108695240	104.032	-0.041154	0.307776	-0.133714	0.893629	0.957602
LOC108695241	2.90636	5.30128	3.59756	1.47358	0.140595	1
LOC108695243	3.24628	2.24535	2.20894	1.01648	0.3094	1
LOC108695244	5.61177	1.71336	1.58821	1.0788	0.280678	1
LOC108695246	2.59673	4.46573	2.6359	1.6942	0.0902279	1
LOC108695247	247.022	-0.511117	0.187434	-2.72692	0.00639277	0.0708176
LOC108695251	85.0951	-2.89539	0.353974	-8.17967	2.84612e-16	7.65387e-14
LOC108695252	271.225	-0.196375	0.213173	-0.921202	0.356945	0.626975
LOC108695254	10.1289	0.77112	1.25645	0.61373	0.539394	0.767585
LOC108695255	2.14238	5.08864	4.16606	1.22145	0.221916	1
LOC108695257	1.38171	2.13791	2.55156	0.837882	0.402097	1
LOC108695258	18.5252	-0.99146	1.25329	-0.791083	0.428895	0.685806
LOC108695259	189.799	-0.112117	0.1617	-0.693364	0.488081	0.732782
LOC108695260	264.323	-0.437247	0.258751	-1.68984	0.0910587	0.314134
LOC108695261	172.337	0.400101	0.177596	2.25288	0.0242668	0.159537
LOC108695263	58.51	1.35562	0.650517	2.08392	0.0371677	0.19925
LOC108695265	4.77446	4.36089	2.02919	2.14908	0.0316278	1
LOC108695267	3.11784	5.08213	3.63579	1.39781	0.162171	1
LOC108695270	331.899	-0.0201404	0.244514	-0.082369	0.934353	0.973768
LOC108695271	20.0968	0.654385	0.646812	1.01171	0.311678	0.585918
LOC108695273	11.6261	5.87039	2.18565	2.68588	0.00723386	0.0769908
LOC108695274	10.9883	4.1479	2.22889	1.86098	0.0627475	0.261108
LOC108695278	37.936	0.546968	0.475457	1.1504	0.249978	0.526611
LOC108695279	4.93073	2.16781	2.15778	1.00465	0.315065	1
LOC108695284	7.59592	3.41099	2.48341	1.37351	0.169594	0.430813
LOC108695285	176.815	0.101223	0.159985	0.632704	0.526927	0.758782
LOC108695286	1.66147	2.85297	3.36712	0.847304	0.396826	1
LOC108695287	2.09921	5.23876	3.19296	1.64072	0.100855	1
LOC108695290	4.05107	-0.0371123	1.70601	-0.0217538	0.982644	1
LOC108695294	15.243	-0.35931	0.725337	-0.495369	0.620339	0.821057
LOC108695296	3.71251	5.98057	3.0768	1.94376	0.0519244	1
LOC108695304	5.66509	3.7809	2.81519	1.34304	0.17926	1
LOC108695305	8.28933	3.15617	2.33054	1.35427	0.175652	0.438404
LOC108695306	1.10402	0.398301	3.60679	0.110431	0.912068	1
LOC108695307	188.577	-1.22909	0.201415	-6.10227	1.04572e-09	1.11716e-07
LOC108695308	18.134	0.0142746	0.775733	0.0184014	0.985319	0.994047
LOC108695309	52.663	-0.295775	0.652257	-0.453464	0.650214	0.83719
LOC108695312	574.502	-0.292213	0.282835	-1.03316	0.301529	0.576855
LOC108695316	68.0275	0.0663626	0.374522	0.177193	0.859357	0.942935
LOC108695319	2.86677	0.974026	3.74215	0.260285	0.794644	1
LOC108695321	3.33039	4.23961	3.17116	1.33692	0.181248	1
LOC108695328	2.54689	4.90956	2.27636	2.15676	0.0310243	1
LOC108695329	447.15	-0.0951599	0.205942	-0.462073	0.644029	0.833873
LOC108695330	3.30767	3.11324	1.94001	1.60475	0.108548	1
LOC108695331	85.914	-0.0996355	0.476846	-0.208947	0.83449	0.931058
LOC108695332	489.6	-2.35874	0.296725	-7.94925	1.87639e-15	4.46823e-13
LOC108695335	2.60994	0.320197	1.83274	0.174709	0.861308	1
LOC108695339	2.58012	5.28387	4.19315	1.26012	0.207626	1
LOC108695341	2.37184	3.69622	2.79612	1.32191	0.186198	1
LOC108695342	9.81582	4.29178	2.40892	1.78162	0.0748115	0.285438
LOC108695343	39.0159	0.536198	0.32236	1.66335	0.0962423	0.32286
LOC108695344	10.1866	0.748712	1.25295	0.597558	0.550135	0.774714
LOC108695345	3088.32	-0.380911	0.221051	-1.72318	0.084856	0.303213
LOC108695346	2.76547	3.26222	2.87788	1.13355	0.256984	1
LOC108695348	18.0732	5.0229	2.58223	1.94518	0.0517534	0.236723
LOC108695349	299.302	-0.17916	0.170548	-1.0505	0.29349	0.568532
LOC108695356	21.0249	1.76467	1.17238	1.5052	0.132274	0.379045
LOC108695358	5.35431	-0.440878	1.8242	-0.241683	0.809026	1
LOC108695359	62.2753	-0.751793	0.313444	-2.39849	0.0164628	0.126992
LOC108695360	181.024	0.232335	0.2091	1.11112	0.266517	0.543548	X
LOC108695362	7.33242	6.81042	2.87592	2.36809	0.0178804	0.133776
LOC108695365	1.87993	5.08324	3.71125	1.36968	0.170785	1
LOC108695366	7.65957	4.86143	3.33478	1.4578	0.144897	0.397368
LOC108695367	2.63956	5.27865	3.69002	1.43052	0.152568	1
LOC108695370	50.4787	-0.296436	0.356764	-0.830902	0.406029	0.667619
LOC108695373	62.5452	0.37019	0.403509	0.917426	0.35892	0.628946
LOC108695374	190.122	0.538614	0.220517	2.4425	0.0145859	0.117725
LOC108695380	17.7488	0.0353654	0.773226	0.0457375	0.96352	0.985212
LOC108695382	226.351	-0.785162	0.216201	-3.63163	0.000281634	0.00710232
LOC108695383	2.55529	5.28401	4.21046	1.25497	0.209489	1
LOC108695386	9.80197	1.23262	1.5376	0.801653	0.422754	0.681164
LOC108695387	9.44207	0.326621	1.08603	0.300749	0.763606	0.897675
LOC108695393	1151.47	0.0855301	0.301696	0.283498	0.776795	0.903627
LOC108695395	2.26798	2.83108	2.99626	0.94487	0.344725	1
LOC108695396	30.7119	-0.544457	0.518877	-1.0493	0.294041	0.569056	X
LOC108695398	27.4216	3.23078	1.25302	2.57839	0.00992613	0.0937862
LOC108695400	6.24279	5.49436	3.12827	1.75636	0.0790278	0.29251
LOC108695401	2.63883	4.80947	3.11721	1.54287	0.122861	1
LOC108695404	31.8285	-0.510434	0.516208	-0.988816	0.322753	0.595972
LOC108695405	12.0951	2.54876	1.73925	1.46543	0.142803	0.394307
LOC108695411	4.44388	4.30787	3.16129	1.36269	0.172979	1
LOC108695413	33.3568	-1.37675	0.544496	-2.52849	0.0114556	0.102306
LOC108695414	4.59726	3.59027	1.95918	1.83254	0.0668713	1
LOC108695416	3.32173	0.69601	1.57517	0.441864	0.658587	1
LOC108695417	35.7085	0.00521253	0.412859	0.0126255	0.989927	0.996182		X
LOC108695419	207.074	-0.189242	0.205624	-0.920331	0.3574	0.627446
LOC108695420	21.6312	-0.976397	1.31247	-0.743938	0.456914	0.707964
LOC108695421	2.26804	2.29467	3.29194	0.697056	0.485768	1
LOC108695426	14.4671	2.81755	1.47619	1.90867	0.0563052	0.247949
LOC108695427	81.9516	0.0356885	0.290578	0.122819	0.902251	0.960932
LOC108695428	2.36675	0.758481	3.3625	0.22557	0.821536	1
LOC108695434	91.2954	0.157323	0.236048	0.666487	0.5051	0.743656
LOC108695435	77.9573	-0.0774494	0.240585	-0.321921	0.747513	0.889482
LOC108695436	4.91515	5.98549	3.48172	1.71912	0.0855929	1
LOC108695437	5.70286	0.735332	2.10268	0.349711	0.726555	1
LOC108695438	88.4622	0.242617	0.28694	0.845532	0.397814	0.660179
LOC108695440	718.068	-0.81392	0.218717	-3.72133	0.000198172	0.00525679
LOC108695447	6.55887	6.20424	3.29875	1.88079	0.0600011	0.255806
LOC108695448	1.22114	1.4049	3.3757	0.41618	0.677278	1
LOC108695449	6.90827	-0.849843	1.03227	-0.823278	0.41035	0.671151
LOC108695450	19.5023	1.90535	1.46002	1.30502	0.191887	0.459006
LOC108695452	1.5019	4.59722	4.27926	1.0743	0.282687	1
LOC108695453	114.346	0.144701	0.237384	0.609567	0.542149	0.769071
LOC108695457	38.3038	0.724493	0.415765	1.74256	0.0814113	0.296997
LOC108695458	84.4938	-0.39541	0.257648	-1.53469	0.124859	0.368532
LOC108695459	211.213	0.767449	0.227941	3.36688	0.000760243	0.0154099
LOC108695462	10.6003	1.82163	1.36477	1.33475	0.181959	0.445718
LOC108695463	221.976	0.245546	0.228855	1.07294	0.2833	0.559472
LOC108695464	20.0431	4.59719	2.25503	2.03864	0.0414861	0.211498
LOC108695465	57.6935	1.04625	0.736593	1.42039	0.155494	0.412274		X
LOC108695467	8.98125	4.22425	2.62067	1.6119	0.106985	0.340967
LOC108695468	2.61093	5.31951	3.59999	1.47765	0.139502	1
LOC108695469	3.2526	2.82461	1.94821	1.44985	0.147101	1
LOC108695470	2.51794	0.825211	3.33689	0.247299	0.804676	1
LOC108695472	7.16558	3.31107	2.17918	1.51941	0.128659	0.373557
LOC108695473	12.2518	4.24606	1.80213	2.35613	0.0184665	0.136379
LOC108695474	90.6856	0.399709	0.302148	1.32289	0.185872	0.450555
LOC108695475	5.26331	5.4416	3.09517	1.7581	0.0787311	1
LOC108695477	1.85296	4.62801	3.61165	1.28141	0.200048	1
LOC108695484	19.4046	2.08977	1.40105	1.49157	0.135811	0.383886
LOC108695486	3.42359	2.57266	2.58054	0.996945	0.318791	1
LOC108695487	30.3838	0.711531	0.714532	0.995799	0.319348	0.593545
LOC108695489	7.75059	5.88228	2.74954	2.13937	0.0324059	0.185966
LOC108695490	5.27629	5.22928	3.189	1.63978	0.10105	1
LOC108695491	4.94227	1.46377	1.58335	0.924481	0.355236	1
LOC108695492	204.961	-0.000989173	0.217241	-0.00455334	0.996367	0.998252
LOC108695493	33.0513	2.89528	1.62759	1.77887	0.0752608	0.286452
LOC108695494	31.0161	1.37794	0.631999	2.18028	0.0292364	0.175222
LOC108695496	7.18748	6.33269	2.14494	2.95239	0.0031532	0.0439517
LOC108695497	3.75925	4.86184	4.05462	1.19909	0.230494	1
LOC108695498	14.7208	-0.378438	0.940926	-0.402198	0.687539	0.8585
LOC108695500	14.2321	3.76607	1.52334	2.47225	0.0134267	0.112405
LOC108695501	28.1864	0.153668	0.489015	0.31424	0.753339	0.892296
LOC108695502	175.839	0.0898468	0.260584	0.34479	0.730252	0.880107
LOC108695503	86.735	0.237471	0.253047	0.938447	0.348015	0.61877
LOC108695504	37.4472	0.222983	0.640114	0.348349	0.727578	0.878869
LOC108695505	88.5553	-0.0062209	0.351977	-0.0176742	0.985899	0.994378		X
LOC108695506	48.9862	1.15621	0.516108	2.24025	0.0250745	0.162327
LOC108695507	7.98729	4.2339	2.77079	1.52805	0.1265	0.370847
LOC108695509	45.0653	-0.209307	0.314904	-0.664668	0.506263	0.744766
LOC108695511	46.0025	0.195924	0.378552	0.517561	0.604764	0.811464
LOC108695512	84.0595	0.201136	0.270275	0.744191	0.456761	0.707797
LOC108695513	17.0214	2.44079	1.37981	1.76893	0.0769055	0.289498
LOC108695514	9.14163	4.08899	2.16175	1.89152	0.0585555	0.252698
LOC108695515	87.4238	0.535873	0.343583	1.55966	0.11884	0.358947
LOC108695517	61.7253	0.201273	0.268998	0.74823	0.454321	0.705797
LOC108695518	110.105	-0.831544	0.208151	-3.99491	6.472e-05	0.00210745
LOC108695519	62.472	-0.183739	0.253381	-0.72515	0.46836	0.717434
LOC108695520	68.8136	-0.187864	0.316281	-0.59398	0.552525	0.776013
LOC108695521	57.093	0.647011	0.398243	1.62466	0.104234	0.336047
LOC108695522	29.8681	-0.0581826	0.706595	-0.0823422	0.934375	0.973768
LOC108695524	4.0305	5.92127	2.98751	1.98201	0.0474786	1
LOC108695525	76.9832	-0.0952255	0.246121	-0.386905	0.698826	0.864208
LOC108695526	55.3099	-0.23019	0.460231	-0.500162	0.616961	0.818949
LOC108695527	385.184	-0.415962	0.229782	-1.81025	0.0702571	0.275601
LOC108695528	34.3273	0.213957	0.484296	0.44179	0.658641	0.842374
LOC108695529	26.3071	0.922517	0.77372	1.19232	0.233138	0.508903
LOC108695530	21.3779	1.16759	1.31406	0.888532	0.374254	0.641935
LOC108695531	4.89197	5.86889	3.49214	1.6806	0.0928408	1
LOC108695532	56.2425	0.00959897	0.371706	0.0258241	0.979398	0.991907
LOC108695533	10.3883	1.59002	1.34717	1.18027	0.237893	0.514245
LOC108695534	8.42111	1.8471	1.44146	1.28141	0.200049	0.469566
LOC108695535	75.4761	-0.0538484	0.331364	-0.162505	0.870908	0.948371
LOC108695536	60.3896	-0.36046	0.410423	-0.878264	0.3798	0.646894
LOC108695537	71.3489	0.330501	0.359472	0.919407	0.357883	0.628033
LOC108695538	51.9325	-0.013119	0.322256	-0.0407097	0.967527	0.986902
LOC108695539	82.3918	-0.0191594	0.273926	-0.0699436	0.944239	0.9781
LOC108695540	17.6822	1.69385	1.23504	1.3715	0.17022	0.431429
LOC108695541	14.042	-0.406489	0.920094	-0.441791	0.658641	0.842374
LOC108695543	16.0308	2.76762	1.07179	2.58224	0.00981625	0.0929624
LOC108695544	47.0287	0.606899	0.496528	1.22229	0.221599	0.495185
LOC108695545	2.71168	5.089	4.20172	1.21117	0.22583	1
LOC108695546	5.62669	0.11781	1.19029	0.0989757	0.921158	1
LOC108695547	7.46027	0.995494	1.32632	0.750567	0.452913	0.70481
LOC108695548	77.1731	0.12585	0.297583	0.422906	0.672363	0.850179
LOC108695549	31.1982	-0.799895	0.549128	-1.45666	0.14521	0.397888
LOC108695550	4.10701	0.218236	1.83109	0.119183	0.90513	1
LOC108695551	22.2813	0.935075	1.02587	0.911496	0.362034	0.631719
LOC108695552	32.9389	3.50197	1.60925	2.17615	0.0295443	0.176153
LOC108695554	23.1098	0.776134	0.50272	1.54387	0.12262	0.365341
LOC108695555	8.69864	3.55507	1.48673	2.3912	0.0167934	0.12862
LOC108695556	23.0855	-0.112961	0.573557	-0.196948	0.843868	0.935863
LOC108695557	47.5065	-0.0662937	0.323116	-0.20517	0.83744	0.932564
LOC108695558	2.08361	4.59722	4.27926	1.0743	0.282687	1
LOC108695559	7.99329	1.93783	1.50356	1.28883	0.197458	0.466487
LOC108695560	2.21853	0.531372	1.81115	0.29339	0.769224	1
LOC108695561	56.3974	0.554372	0.466996	1.1871	0.235187	0.511224
LOC108695562	26.0682	-0.531027	0.525107	-1.01127	0.311885	0.586136
LOC108695563	81.9332	0.211877	0.340977	0.621382	0.534348	0.763927
LOC108695564	31.8473	0.347901	0.570562	0.609751	0.542027	0.769058
LOC108695565	32.1292	0.857547	0.429218	1.99793	0.0457241	0.222169
LOC108695566	0.960117	0.196417	2.69528	0.0728744	0.941906	1
LOC108695567	24.917	0.505172	0.617439	0.818173	0.413258	0.673472
LOC108695568	112.78	-0.403171	0.243765	-1.65393	0.0981416	0.325868
LOC108695569	12.4905	1.32177	1.26722	1.04305	0.296927	0.57242
LOC108695570	224.626	-0.307211	0.168175	-1.82673	0.0677407	0.271232
LOC108695571	5.91344	0.969007	1.96091	0.494163	0.621191	0.821313
LOC108695572	34.4544	2.93485	2.28566	1.28403	0.199132	0.468542
LOC108695573	8.31228	0.76623	1.21034	0.633072	0.526686	0.758693
LOC108695574	149.308	-1.2191	0.190724	-6.39197	1.63767e-10	1.96489e-08
LOC108695575	101.621	-0.0725814	0.467907	-0.155119	0.876727	0.950566
LOC108695576	303.988	-0.13722	0.319779	-0.42911	0.667843	0.847402
LOC108695577	123.41	-0.379961	0.351807	-1.08003	0.28013	0.556798
LOC108695578	2.16591	4.41071	3.69961	1.19221	0.233179	1
LOC108695579	381.285	-0.859882	0.577408	-1.48921	0.136432	0.384799
LOC108695580	268.723	0.0977169	0.20659	0.472999	0.636214	0.830319
LOC108695581	14.7618	5.01753	3.02976	1.65608	0.0977049	0.32511
LOC108695582	529.901	-0.492155	0.22268	-2.21014	0.0270954	0.168278
LOC108695583	48.945	0.286537	0.37059	0.773192	0.439409	0.694571
LOC108695584	2.25554	3.73684	3.33673	1.11991	0.262752	1
LOC108695585	56.2672	-0.221597	0.379131	-0.584486	0.558893	0.780389
LOC108695586	54.6837	-0.325752	0.353547	-0.921383	0.356851	0.626874		X
LOC108695587	27.775	6.25261	4.21182	1.48454	0.137666	0.386996
LOC108695588	8.32688	1.51388	1.25716	1.20421	0.228508	0.503803
LOC108695589	6.90517	4.44709	2.68266	1.65771	0.0973754	0.324533
LOC108695591	8.67197	0.585271	1.24668	0.469465	0.638737	0.831301	X
LOC108695592	304.817	1.41646	0.838232	1.68982	0.0910631	0.314134
LOC108695593	2.05223	1.39553	2.80207	0.498037	0.618458	1
LOC108695598	1.46598	1.20573	2.10802	0.571972	0.567341	1
LOC108695610	2.71924	5.60399	3.60948	1.55258	0.120525	1
LOC108695611	3.96869	4.11294	3.24627	1.26697	0.205164	1
LOC108695612	5.92265	4.77999	3.48247	1.37258	0.169881	0.430917
LOC108695613	1.82023	5.27833	3.66636	1.43967	0.149962	1
LOC108695614	3.99331	5.44955	3.57347	1.525	0.127259	1
LOC108695615	1.20679	3.0584	3.68625	0.829679	0.406721	1
LOC108695616	3.55202	5.74242	3.5415	1.62147	0.104917	1
LOC108695628	3.09373	2.84779	3.26398	0.872489	0.382942	1
LOC108695629	1.735	3.83112	3.78829	1.01131	0.311869	1
LOC108695630	1.58916	4.3219	4.17598	1.03494	0.300695	1
LOC108695632	3.5676	4.77596	2.43538	1.96108	0.0498702	1
LOC108695633	1.54842	3.80873	3.24846	1.17247	0.241007	1
LOC108695634	1.80391	3.23965	4.32855	0.748437	0.454196	1
LOC108695635	1.66384	5.4545	4.05915	1.34375	0.179028	1
LOC108695636	6.72522	6.18047	2.57955	2.39595	0.0165774	0.127561
LOC108695637	2.89906	5.08188	3.62013	1.40378	0.160383	1
LOC108695638	25.7758	1.67055	0.981536	1.70198	0.0887595	0.310305
LOC108695639	8.34431	0.330042	1.6398	0.20127	0.840487	0.933973
LOC108695641	1.82214	4.86431	4.27386	1.13815	0.255056	1
LOC108695643	4.52305	5.8727	3.94649	1.48808	0.136729	1
LOC108695645	4.21687	5.60757	3.9905	1.40523	0.159953	1
LOC108695646	3.6843	3.8943	3.66717	1.06194	0.288265	1
LOC108695647	1.54243	3.84418	4.30103	0.893782	0.371439	1
LOC108695648	3.48014	3.82538	3.6197	1.05682	0.290593	1
LOC108695649	2.5743	4.26809	4.21529	1.01253	0.311286	1
LOC108695651	1.82839	4.5782	3.31044	1.38296	0.166677	1
LOC108695653	0.843544	2.07494	3.27762	0.633062	0.526693	1
LOC108695655	1.1546	1.72374	3.76536	0.457789	0.647104	1
LOC108695659	10.7958	1.10396	1.00289	1.10077	0.270995	0.548157
LOC108695660	12.2889	6.03949	2.29344	2.63337	0.0084542	0.0849095
LOC108695661	4.76831	5.73669	3.11942	1.83902	0.0659119	1
LOC108695662	2.69927	5.08903	4.20483	1.21028	0.226171	1
LOC108695663	2.31319	4.31784	3.76923	1.14555	0.251981	1
LOC108695665	15.5187	2.21587	1.50457	1.47276	0.140815	0.3913
LOC108695666	6.84674	3.94198	2.40712	1.63763	0.101498	0.331914
LOC108695667	71.6827	-0.370549	0.3501	-1.05841	0.289869	0.565293
LOC108695668	68.0244	2.02529	1.11166	1.82187	0.0684754	0.27282		X
LOC108695669	28.8121	0.931905	0.610537	1.52637	0.126918	0.371409
LOC108695671	1310.02	-0.513055	0.237808	-2.15743	0.0309721	0.180864
LOC108695672	50.4399	-0.489752	0.294863	-1.66095	0.0967239	0.323619
LOC108695673	126.461	0.247864	0.263112	0.942044	0.34617	0.617355
LOC108695674	3.76851	5.65117	2.86541	1.9722	0.0485863	1
LOC108695675	2.00179	2.79642	2.62785	1.06415	0.287262	1
LOC108695678	15.8688	2.65867	1.24428	2.13671	0.0326213	0.186533
LOC108695679	896.102	-0.946718	0.235164	-4.02578	5.67859e-05	0.00188451
LOC108695680	10.6332	3.19967	2.19177	1.45986	0.14433	0.396451
LOC108695683	13.0037	7.1087	4.23558	1.67833	0.0932824	0.317505
LOC108695685	1.564	-0.259688	3.26065	-0.0796431	0.936521	1
LOC108695686	1.53167	3.23766	4.2651	0.759105	0.44779	1
LOC108695689	22.9954	1.04848	0.784832	1.33592	0.181574	0.445109
LOC108695690	162.053	-0.6655	0.264342	-2.51757	0.0118166	0.104277
LOC108695691	58.4308	0.184371	0.510583	0.3611	0.718025	0.873622
LOC108695693	4.91845	5.74177	3.48276	1.64863	0.0992237	1
LOC108695694	30.4509	0.921961	0.820098	1.12421	0.260925	0.538088
LOC108695696	45.3284	0.720078	1.11945	0.643245	0.520065	0.754437
LOC108695697	3.76658	1.47573	2.38564	0.618586	0.536189	1
LOC108695700	130.696	0.597715	0.242706	2.46271	0.0137891	0.114128	X
LOC108695702	5.82383	4.07683	2.82	1.44568	0.148266	1
LOC108695703	47.5764	0.246761	0.397923	0.620122	0.535177	0.764606
LOC108695704	9.28671	4.14581	2.23057	1.85863	0.0630796	0.261706
LOC108695705	4.23271	5.67795	3.13187	1.81296	0.0698386	1
LOC108695708	7.11495	6.283	3.00742	2.08917	0.0366928	0.198408
LOC108695710	2.01241	1.72168	3.33568	0.516141	0.605756	1
LOC108695711	31.8537	2.95165	0.994953	2.96662	0.00301095	0.0425119
LOC108695714	3.52711	3.79964	3.09487	1.22772	0.219551	1
LOC108695721	2.53541	4.59669	4.2371	1.08487	0.27798	1
LOC108695725	4.47088	4.86062	3.96028	1.22734	0.219694	1
LOC108695726	2.35162	5.6045	3.65721	1.53245	0.12541	1
LOC108695727	3.45467	4.69637	3.24519	1.44718	0.147846	1
LOC108695728	2.40524	4.85638	3.6843	1.31813	0.187461	1
LOC108695729	1.54415	1.7154	3.80918	0.450333	0.652471	1
LOC108695731	2.39891	5.45554	4.18873	1.30243	0.192768	1
LOC108695733	1.37963	3.90808	3.73642	1.04594	0.295588	1
LOC108695734	2.10514	5.08956	4.26297	1.1939	0.232518	1
LOC108695735	267.562	-0.868514	0.188537	-4.60659	4.0933e-06	0.000195545
LOC108695737	2.91277	5.4543	4.03307	1.35239	0.176249	1
LOC108695738	1.39913	3.21877	3.78052	0.851409	0.394542	1
LOC108695739	10.0012	5.71287	2.64688	2.15834	0.0309011	0.180787
LOC108695740	262.949	-0.594499	0.179814	-3.3062	0.000945715	0.0181548
LOC108695741	3.47539	4.54715	2.33218	1.94974	0.0512069	1
LOC108695742	3.37336	3.11832	1.98254	1.57289	0.115744	1
LOC108695744	2.05654	4.84746	3.26814	1.48325	0.138009	1
LOC108695745	2.54415	5.22943	2.8209	1.85381	0.063766	1
LOC108695747	1.73467	3.21229	3.65248	0.87948	0.379141	1
LOC108695749	1.50093	3.21125	3.63337	0.883821	0.376793	1
LOC108695751	3.2461	5.27802	3.64167	1.44934	0.147243	1
LOC108695752	3.35468	2.7381	2.86652	0.955202	0.339476	1
LOC108695753	43.0698	0.34402	0.354403	0.970702	0.331697	0.604221
LOC108695754	10.1723	3.83282	1.46408	2.6179	0.00884733	0.0873118
LOC108695756	83.7381	1.09737	0.241708	4.54007	5.62358e-06	0.000257225
LOC108695757	1118.87	-0.0574737	0.256595	-0.223986	0.822768	0.925611
LOC108695758	9.75092	0.229404	0.954707	0.240287	0.810108	0.919024
LOC108695759	67.796	0.605279	0.472987	1.27969	0.200653	0.470276
LOC108695760	1.93842	3.19333	3.34958	0.953351	0.340412	1
LOC108695761	75.7821	-0.0406553	0.340616	-0.119358	0.904992	0.962045
LOC108695762	61.4175	1.8662	1.0429	1.78942	0.0735467	0.282687
LOC108695763	14.3682	4.54484	2.83727	1.60183	0.109193	0.344468
LOC108695764	14.6503	2.27874	1.28727	1.77021	0.0766927	0.289255
LOC108695767	1.72319	2.3265	3.31143	0.702567	0.482326	1
LOC108695771	2.70977	5.45026	3.63144	1.50085	0.133393	1
LOC108695772	9.53798	2.14714	1.96784	1.09111	0.275223	0.552341
LOC108695773	2.44721	1.44241	2.86124	0.504121	0.614176	1
LOC108695774	1302.54	-0.308546	0.295798	-1.0431	0.296904	0.57242
LOC108695775	8.40483	5.85654	2.44383	2.39646	0.0165541	0.127464
LOC108695776	1.49243	0.460631	3.23874	0.142226	0.886902	1
LOC108695777	252.439	-0.224844	0.184078	-1.22146	0.221913	0.49565
LOC108695778	2.287	1.75019	3.37404	0.518723	0.603954	1
LOC108695780	3.45784	4.40467	2.96154	1.48729	0.136938	1
LOC108695781	60.4222	-0.564909	0.324635	-1.74014	0.0818351	0.297882
LOC108695782	12.092	2.63027	1.84223	1.42777	0.153359	0.409804
LOC108695783	55.3491	-0.546518	0.410289	-1.33203	0.18285	0.446826
LOC108695784	2.65301	2.43961	3.32835	0.73298	0.463571	1
LOC108695785	36.5216	-3.53896	0.624398	-5.66779	1.44649e-08	1.31172e-06
LOC108695787	298.578	-0.609022	0.274233	-2.22082	0.0263631	0.166523		X
LOC108695788	4.1939	4.1023	2.87986	1.42448	0.154308	1
LOC108695789	154.154	-0.430248	0.322821	-1.33278	0.182605	0.446511
LOC108695791	6.59608	4.7191	2.75511	1.71285	0.0867401	0.306671
LOC108695792	9.76395	6.3209	2.37723	2.65894	0.0078388	0.0812126
LOC108695794	2.54473	3.61829	3.37409	1.07238	0.283551	1
LOC108695795	102.583	0.504537	0.214185	2.35561	0.0184922	0.136415
LOC108695796	3.35701	5.86949	3.55354	1.65173	0.0985898	1
LOC108695797	96.8097	0.731534	0.295126	2.47871	0.0131857	0.111059
LOC108695798	9.19557	6.44009	2.1181	3.04051	0.00236178	0.0355921
LOC108695799	17.4562	0.455431	0.709615	0.641801	0.521002	0.755095
LOC108695800	2.50635	5.6045	3.657	1.53254	0.125389	1
LOC108695801	3.13168	4.73869	3.27425	1.44726	0.147824	1
LOC108695803	5.82827	2.86251	2.17686	1.31497	0.18852	1
LOC108695804	116.962	-0.409498	0.276985	-1.47841	0.139297	0.389697
LOC108695805	4.07847	4.86187	2.36073	2.05948	0.0394487	1
LOC108695807	7.22748	2.39171	1.16545	2.05218	0.0401517	0.208096
LOC108695808	5.72211	-0.155897	1.64731	-0.0946371	0.924603	1
LOC108695810	4.6716	4.63712	3.23317	1.43423	0.151507	1
LOC108695812	7.46811	1.93452	1.32668	1.45817	0.144794	0.397192
LOC108695813	354.957	0.139407	0.179765	0.775495	0.438047	0.693353
LOC108695814	1127.71	0.584753	0.261065	2.23987	0.0250992	0.162374
LOC108695815	12.1056	-1.12626	0.778301	-1.44708	0.147875	0.401644
LOC108695816	7.87914	2.1529	1.66148	1.29577	0.195054	0.463314
LOC108695817	21.2726	0.300687	1.18823	0.253054	0.800227	0.914684
LOC108695820	5.46786	5.27514	3.44739	1.53018	0.125971	1
LOC108695821	8.7122	4.81513	1.80759	2.66384	0.00772537	0.0804529
LOC108695822	16.0362	0.851566	1.11961	0.760588	0.446903	0.700204
LOC108695823	1.38661	2.86916	3.78294	0.758447	0.448183	1
LOC108695825	1.99676	5.45606	4.26488	1.2793	0.200792	1
LOC108695826	8.25101	4.94454	2.42093	2.04241	0.0411106	0.210478
LOC108695828	3.53286	3.29512	3.67726	0.896079	0.37021	1
LOC108695829	8.91454	0.756016	1.17321	0.644399	0.519317	0.753843
LOC108695830	4.8883	-1.05362	2.40708	-0.437715	0.661593	1
LOC108695831	4.82565	1.81298	3.17715	0.57063	0.56825	1
LOC108695832	3.90088	4.56673	2.99557	1.52449	0.127385	1
LOC108695833	14.6597	1.11936	1.47762	0.757544	0.448724	0.701703
LOC108695834	3.9073	3.34673	2.21344	1.512	0.130534	1
LOC108695836	3.15013	2.40192	2.96645	0.809696	0.418115	1
LOC108695837	11.2749	1.98557	1.40682	1.41139	0.15813	0.416224
LOC108695839	3.76778	2.04797	2.92285	0.700677	0.483504	1
LOC108695840	1.96483	-1.10857	3.04616	-0.363925	0.715914	1
LOC108695842	5.45042	4.16563	2.93419	1.41969	0.155699	1
LOC108695843	5.57611	-2.15868	2.0813	-1.03718	0.299653	1
LOC108695845	51.7223	-2.50248	0.997965	-2.50758	0.012156	0.106072
LOC108695846	8.43054	3.98047	2.7784	1.43265	0.151957	0.407554
LOC108695847	2.55673	3.88439	3.22077	1.20605	0.2278	1
LOC108695848	0.794305	-1.38267	3.62777	-0.381136	0.703102	1
LOC108695849	2.54068	2.64278	3.00665	0.878978	0.379413	1
LOC108695850	4.50919	4.76976	2.8629	1.66606	0.095701	1
LOC108695851	1.68016	3.82943	3.73604	1.025	0.305364	1
LOC108695855	2.69597	5.45543	4.1734	1.30719	0.191148	1
LOC108695859	1.80382	3.80615	3.20205	1.18866	0.234574	1
LOC108695860	13.8425	4.46934	1.86143	2.40103	0.0163491	0.126396
LOC108695861	17.9806	4.39702	1.43996	3.05357	0.00226134	0.0345289
LOC108695864	4.40405	5.9849	3.42264	1.74862	0.0803561	1
LOC108695867	9.61519	5.7707	2.58554	2.23191	0.0256207	0.164215
LOC108695870	4.35168	5.50935	3.18949	1.72735	0.0841057	1
LOC108695871	3.81714	2.86039	3.19355	0.895678	0.370425	1
LOC108695872	2.22758	4.26907	4.27653	0.998257	0.318155	1
LOC108695874	4.33987	5.90631	2.84765	2.0741	0.0380703	1
LOC108695875	4.37684	6.38599	3.43385	1.85972	0.0629253	1
LOC108695876	2.38671	3.88839	3.3769	1.15147	0.24954	1
LOC108695877	5.47003	4.25269	2.73251	1.55633	0.119629	1
LOC108695878	5.75101	5.41074	3.09791	1.74658	0.08071	1
LOC108695879	7.17802	5.85272	3.37259	1.73538	0.0826738	0.299418
LOC108695880	3.20378	3.12391	3.22234	0.969452	0.33232	1
LOC108695881	2.6156	4.63581	3.15815	1.46789	0.142134	1
LOC108695882	4.73986	5.87206	3.85734	1.52231	0.127932	1
LOC108695883	4.40576	4.63674	3.21076	1.44413	0.148704	1
LOC108695884	4.52774	5.60249	3.48225	1.60887	0.107644	1
LOC108695885	3.78614	4.25264	3.52597	1.20609	0.227782	1
LOC108695886	15.8298	4.37387	2.76638	1.58108	0.11386	0.351288
LOC108695887	1.70684	1.71383	2.85007	0.60133	0.54762	1
LOC108695890	23.0591	3.23661	1.20168	2.69341	0.00707245	0.0757901
LOC108695891	9.07884	5.45599	1.85715	2.93784	0.00330512	0.0454702
LOC108695892	1.8687	3.33132	2.92054	1.14065	0.254015	1
LOC108695894	37.9824	0.873925	0.542292	1.61154	0.107062	0.34104
LOC108695895	7.55413	1.88976	1.4704	1.28521	0.19872	0.46783
LOC108695896	2.4589	5.32469	3.60161	1.47842	0.139296	1
LOC108695897	2.92586	5.08278	3.67861	1.38171	0.16706	1
LOC108695899	6.81701	2.3795	1.49836	1.58806	0.112272	0.349068
LOC108695900	3.0615	1.04739	3.71645	0.281825	0.778077	1
LOC108695901	289.279	0.197568	0.252834	0.781413	0.43456	0.690594
LOC108695902	10.688	4.99329	2.25556	2.21377	0.0268445	0.167651
LOC108695903	6.08957	3.34951	3.08604	1.08537	0.277757	0.554638
LOC108695904	6.63955	2.91378	2.72546	1.0691	0.285026	0.561326
LOC108695906	204.648	-6.67199	2.31995	-2.87592	0.00402849	0.0520583
LOC108695907	10.6898	7.3579	4.15411	1.77123	0.0765218	0.288897
LOC108695909	2.57847	5.45551	4.18456	1.30372	0.192327	1
LOC108695911	5.89069	5.97974	3.02291	1.97814	0.0479128	0.227374
LOC108695912	612.4	-0.26151	0.244597	-1.06915	0.285004	0.561317
LOC108695914	1.80496	4.31266	3.73087	1.15594	0.247706	1
LOC108695917	1.79009	-0.670966	2.5991	-0.258153	0.796289	1
LOC108695918	7.11283	3.52928	2.12494	1.66088	0.0967369	0.323619
LOC108695919	4.72001	4.60605	2.26993	2.02916	0.0424417	1
LOC108695920	4.24721	3.44344	3.24893	1.05987	0.289204	1
LOC108695921	5.42881	3.49164	2.53855	1.37545	0.168993	1
LOC108695922	4.2983	2.84488	1.76769	1.60938	0.107533	1
LOC108695923	5.03557	5.92783	2.3145	2.56117	0.0104321	1
LOC108695924	1.49113	4.26923	4.2874	0.995762	0.319366	1
LOC108695925	1.70578	0.76284	3.88677	0.196266	0.844402	1
LOC108695926	6.14392	5.58956	2.80008	1.99622	0.0459101	0.222386
LOC108695927	3.4065	5.43555	2.85376	1.9047	0.0568188	1
LOC108695929	6.67558	4.12608	3.37414	1.22286	0.221384	0.494811
LOC108695931	18.736	1.93719	1.27989	1.51356	0.130139	0.375791
LOC108695932	2.68103	3.84245	4.21785	0.910999	0.362296	1
LOC108695933	3.16348	5.0884	4.13912	1.22934	0.218943	1
LOC108695935	1.65828	4.26923	4.2874	0.995763	0.319365	1
LOC108695936	1.80391	3.23965	4.32855	0.748437	0.454196	1
LOC108695937	2.39494	2.23457	3.39199	0.658777	0.510039	1
LOC108695940	3.87287	6.19044	3.13697	1.97338	0.0484518	1
LOC108695941	4.21358	5.87295	3.9843	1.47402	0.140475	1
LOC108695942	1.48949	4.59708	4.26992	1.07662	0.28165	1
LOC108695943	3.31102	4.38822	2.48443	1.76629	0.0773476	1
LOC108695944	5.22501	4.64392	2.63226	1.76423	0.077693	1
LOC108695945	4.3226	4.73411	3.10462	1.52486	0.127295	1
LOC108695946	3.69357	4.30875	3.20165	1.34579	0.17837	1
LOC108695947	3.50501	0.622283	2.65926	0.234006	0.81498	1
LOC108695948	2.63148	1.83824	3.34287	0.549899	0.582388	1
LOC108695949	1.88718	4.09347	3.77844	1.08338	0.278641	1
LOC108695950	3.70398	0.832362	2.26858	0.366908	0.713688	1
LOC108695952	4.51228	5.06746	2.97898	1.70107	0.0889292	1
LOC108695953	5.88408	3.32303	3.01426	1.10244	0.270271	0.547324
LOC108695954	1.65993	3.8442	4.30103	0.893787	0.371436	1
LOC108695955	23.5378	22.1035	4.25007	5.20073	NA	1
LOC108695959	16.2838	5.68055	1.86323	3.04877	0.0022978	0.0348808
LOC108695960	873.494	0.0933163	0.198528	0.470042	0.638325	0.831174
LOC108695961	99.4637	-0.482642	0.286788	-1.68292	0.09239	0.31631
LOC108695962	211.454	0.207949	0.224048	0.928142	0.353334	0.623889
LOC108695963	3.67885	2.76044	3.66824	0.752525	0.451736	1
LOC108695964	1.3904	4.31126	3.64458	1.18292	0.23684	1
LOC108695965	409.232	-0.397212	0.218944	-1.81422	0.0696443	0.27456
LOC108695966	3.61111	3.79953	3.09313	1.22838	0.219306	1
LOC108695967	44.9771	2.79583	0.665854	4.19886	2.68261e-05	0.000992694
LOC108695968	14.5311	4.20512	1.28788	3.26514	0.00109411	0.0202436
LOC108695969	3.4233	5.08802	4.10139	1.24056	0.214768	1
LOC108695970	5.59035	6.19001	3.10165	1.99572	0.045965	1
LOC108695971	2.29053	4.02747	3.74949	1.07414	0.282761	1
LOC108695973	2.23505	5.08926	4.23002	1.20313	0.228927	1
LOC108695974	16.8279	3.28686	1.07105	3.06882	0.00214902	0.0332699
LOC108695975	6.4664	6.04151	2.99421	2.01773	0.0436196	0.216626
LOC108695976	7.56432	2.09214	2.15621	0.970288	0.331903	0.604491
LOC108695977	4.21363	4.03434	2.69094	1.49923	0.133814	1
LOC108695978	3.36916	5.2779	3.63266	1.4529	0.146251	1
LOC108695979	6.38454	5.38192	2.05487	2.61911	0.00881597	0.087223
LOC108695980	7.48286	6.6819	3.30161	2.02383	0.0429877	0.215077
LOC108695981	2.68468	4.57769	3.2935	1.38992	0.164554	1
LOC108695982	6.91861	-0.1538	1.49024	-0.103205	0.917801	0.96799
LOC108695983	140.314	-1.07604	0.219802	-4.89551	9.80525e-07	5.46205e-05
LOC108695984	8.45925	2.65885	2.09865	1.26694	0.205178	0.474932
LOC108695985	6.47783	3.90679	3.0599	1.27677	0.201684	0.471488
LOC108695986	3.09143	4.483	3.25843	1.37581	0.168879	1
LOC108695987	4.77483	4.95543	2.47914	1.99885	0.0456242	1
LOC108695988	3.47237	-0.00676757	2.50398	-0.00270272	0.997844	1
LOC108695989	27.3695	-0.0200339	2.08947	-0.00958805	0.99235	0.99678
LOC108695990	27.9215	-0.0695426	0.830392	-0.0837467	0.933258	0.973548
LOC108695991	50.4317	1.3709	0.361479	3.79248	0.00014915	0.00420301
LOC108695992	33.5737	1.26763	0.834876	1.51834	0.128928	0.373929
LOC108695993	6.889	2.27329	2.36546	0.961034	0.336535	0.608774
LOC108696000	24.085	7.6893	4.24492	1.81141	0.0700767	0.275361
LOC108696003	32.5534	2.18172	0.728156	2.99623	0.00273339	0.039678
LOC108696004	10.544	3.80159	1.70735	2.2266	0.025974	0.165458
LOC108696005	20.3586	4.36833	1.15904	3.76891	0.000163959	0.00453834
LOC108696007	21.958	0.142652	0.599964	0.237767	0.812062	0.920155
LOC108696008	7.68365	1.89959	1.64424	1.1553	0.247967	0.524642
LOC108696012	248.646	0.0898834	0.218163	0.412001	0.680338	0.854321
LOC108696013	55.3176	-0.0302732	0.342207	-0.0884646	0.929507	0.972302
LOC108696014	175.943	-0.65563	0.321283	-2.04067	0.0412841	0.21094
LOC108696015	3.68167	5.0735	3.19485	1.58802	0.112281	1
LOC108696016	248.987	-0.457374	0.287182	-1.59263	0.111243	0.347659
LOC108696017	4.05276	5.44897	3.52918	1.54398	0.122594	1
LOC108696018	3.91234	5.08731	4.03346	1.26128	0.20721	1
LOC108696019	62.6432	3.61751	1.84642	1.95921	0.0500887	0.233028
LOC108696020	40.1343	-0.794908	0.518234	-1.53388	0.125059	0.368798
LOC108696022	187.357	-0.589129	0.219985	-2.67804	0.00740547	0.0782302		X
LOC108696023	7.87869	1.55411	1.07891	1.44044	0.149743	0.404625
LOC108696024	7.77826	1.57465	1.14701	1.37283	0.169804	0.430864
LOC108696025	10.7965	1.52306	0.79311	1.92037	0.0548118	0.24427
LOC108696026	2.47603	1.00225	2.85549	0.350992	0.725594	1
LOC108696027	14.9201	6.49208	2.23305	2.90727	0.00364598	0.0484831
LOC108696028	3.23659	4.13555	2.93268	1.41016	0.158492	1
LOC108696029	18.4808	3.1021	1.58289	1.95976	0.0500234	0.232942
LOC108696031	3.46677	4.58597	3.60793	1.27108	0.2037	1
LOC108696032	4.605	6.19599	3.76478	1.64578	0.09981	1
LOC108696034	3.74426	5.6032	3.54107	1.58235	0.11357	1
LOC108696035	11.5292	2.37452	1.55877	1.52333	0.127677	0.372301
LOC108696036	2.11894	5.08294	3.68975	1.37758	0.168332	1
LOC108696037	14.3692	3.91667	1.82892	2.14152	0.0322321	0.185308
LOC108696038	9.52939	3.64035	1.89721	1.91879	0.055011	0.244878
LOC108696040	4.0068	2.28089	2.63092	0.866955	0.385967	1
LOC108696044	4.01023	1.16318	2.16741	0.536668	0.591497	1
LOC108696045	117.512	0.35741	0.267146	1.33788	0.180934	0.444254
LOC108696047	5.02307	0.0954878	1.26549	0.0754552	0.939853	1
LOC108696052	3.12592	5.98643	3.58556	1.6696	0.0949992	1
LOC108696053	37.2535	4.60734	2.13141	2.16164	0.0306463	0.17987
LOC108696054	5.72893	2.12682	2.0157	1.05513	0.291367	1
LOC108696056	12.6189	1.91956	1.4903	1.28804	0.197731	0.466831
LOC108696057	38.4309	-0.685933	0.432081	-1.58751	0.112397	0.349068
LOC108696061	62.0044	0.183922	0.2619	0.702261	0.482517	0.728821
LOC108696065	21.613	1.88135	1.55009	1.2137	0.224861	0.499504
LOC108696066	46.6867	0.259313	0.513614	0.504879	0.613644	0.817223
LOC108696067	73.1246	-0.163606	0.278696	-0.58704	0.557177	0.779259		X
LOC108696068	1.64851	-0.216633	3.46651	-0.0624931	0.95017	1
LOC108696071	124.811	-0.589564	0.314999	-1.87163	0.0612571	0.258185
LOC108696073	5.09966	-0.357997	1.8113	-0.197646	0.843322	1
LOC108696074	630.553	-0.708835	0.218333	-3.24658	0.001168	0.0212206
LOC108696075	63.743	0.210668	0.265266	0.794176	0.427093	0.684432
LOC108696078	1631.25	-0.0389412	0.267565	-0.145539	0.884285	0.954079
LOC108696085	31.4248	0.76709	0.445991	1.71997	0.0854382	0.303801
LOC108696087	228.268	0.27248	0.2047	1.33112	0.18315	0.447226
LOC108696088	4.15963	1.24961	1.59566	0.783132	0.43355	1
LOC108696090	7.31443	1.22521	2.02788	0.60418	0.545724	0.771724
LOC108696093	6.16115	0.941881	1.4755	0.638346	0.523248	0.756533
LOC108696096	380.076	-0.129354	0.197576	-0.654705	0.512658	0.749702
LOC108696099	24.537	0.721932	0.572773	1.26042	0.20752	0.478213
LOC108696100	20.2999	4.3693	1.26888	3.44342	0.000574397	0.0124357
LOC108696102	9.37208	0.783561	1.02831	0.761991	0.446065	0.699598
LOC108696103	150.632	0.421065	0.23543	1.78849	0.0736966	0.283019
LOC108696105	1.97977	3.9403	2.93498	1.34253	0.179424	1
LOC108696107	138.256	0.223865	0.278262	0.804514	0.4211	0.68004
LOC108696109	195.563	0.497905	0.219815	2.26511	0.0235057	0.15687
LOC108696110	198.751	-0.482418	0.228542	-2.11085	0.0347849	0.193261		X
LOC108696111	195.008	-0.027471	0.20966	-0.131027	0.895754	0.95821
LOC108696112	16.3825	0.982695	1.16032	0.846919	0.39704	0.659655
LOC108696113	1.5863	0.895374	2.89426	0.309362	0.757046	1
LOC108696114	1.26731	4.25586	3.63915	1.16947	0.242216	1
LOC108696115	3.66243	0.804348	2.55849	0.314384	0.753229	1
LOC108696118	113.767	0.452637	0.248497	1.82149	0.0685318	0.27282
LOC108696120	70.436	1.21349	1.07748	1.12623	0.260068	0.537193
LOC108696123	2.14287	0.272613	2.03668	0.133852	0.89352	1
LOC108696132	2.16425	4.85437	3.57471	1.35797	0.174472	1
LOC108696133	1.11514	-1.51226	2.96985	-0.509203	0.61061	1
LOC108696134	149.31	-1.10346	0.165623	-6.6625	2.69216e-11	3.80009e-09
LOC108696138	207.347	-0.408586	0.203899	-2.00387	0.0450844	0.220371
LOC108696140	12.5898	0.474633	0.824505	0.575658	0.564846	0.784837
LOC108696141	2.62248	1.45032	1.8617	0.779032	0.435961	1
LOC108696143	350.473	0.269397	0.276521	0.974237	0.329939	0.602673
LOC108696144	1.11651	2.03155	2.5084	0.809897	0.417999	1
LOC108696145	279.092	0.446733	0.19578	2.28181	0.0225007	0.152646
LOC108696147	8.10448	2.07415	2.02539	1.02408	0.305798	0.580618
LOC108696153	1.20391	0.441068	2.66489	0.165511	0.868542	1
LOC108696154	15.8561	4.81327	1.8242	2.63856	0.00832585	0.0843811
LOC108696160	793.394	0.076436	0.262697	0.290966	0.771077	0.901436
LOC108696161	11.2163	1.49911	1.35464	1.10665	0.268445	0.545374
LOC108696163	109.474	0.221992	0.259237	0.856325	0.391818	0.65527
LOC108696164	26.4382	0.261864	0.804479	0.325508	0.744797	0.888113
LOC108696165	5.11999	2.20905	1.37537	1.60615	0.108242	1
LOC108696166	276.909	0.0488234	0.204208	0.239086	0.811039	0.919578
LOC108696170	11.6569	1.77781	1.50275	1.18304	0.236794	0.513052
LOC108696172	12.454	2.89911	1.66568	1.7405	0.0817715	0.297802		X
LOC108696173	92.3454	-0.216202	0.265753	-0.813543	0.415907	0.675459
LOC108696174	106.942	2.8499	1.78308	1.5983	0.109976	0.345662
LOC108696176	32.3812	0.33719	0.399089	0.844899	0.398167	0.660541
LOC108696179	12.1829	5.22186	2.47394	2.11075	0.0347938	0.193261
LOC108696180	121.153	0.814079	0.300458	2.70946	0.00673926	0.0734561		X
LOC108696181	8.4352	0.953864	1.07965	0.883493	0.37697	0.644502
LOC108696184	930.054	-0.303305	0.199235	-1.52235	0.127921	0.372492
LOC108696188	7.26474	2.31754	2.27071	1.02062	0.307433	0.582222
LOC108696191	58.7566	0.183887	0.61782	0.297639	0.765979	0.898768
LOC108696193	1.64714	3.61834	3.37519	1.07204	0.283702	1
LOC108696194	151.975	-0.314986	0.300313	-1.04886	0.294244	0.569298
LOC108696196	223.109	0.474898	0.238848	1.98828	0.0467804	0.224683
LOC108696198	4.57712	5.86317	3.06038	1.91583	0.0553866	1
LOC108696199	29.5825	4.14892	1.14773	3.61491	0.000300457	0.0074446
LOC108696200	6.21642	5.02351	3.46128	1.45134	0.146684	0.399822
LOC108696204	100.847	0.159523	0.2487	0.641428	0.521245	0.755109
LOC108696207	10.4285	0.497496	0.938673	0.53	0.596112	0.806079	X
LOC108696208	19.1934	-0.556638	0.559913	-0.994149	0.32015	0.594085
LOC108696209	7.23025	1.80859	1.70841	1.05864	0.289763	0.565273
LOC108696210	18.72	0.351986	0.796864	0.441714	0.658696	0.842374
LOC108696211	30.5048	0.354319	0.600088	0.590445	0.554892	0.777482
LOC108696212	38.289	-0.581706	0.483188	-1.20389	0.228632	0.503811
LOC108696217	16.2782	2.76042	1.22182	2.25927	0.0238667	0.157771
LOC108696218	23.8238	2.32047	1.33282	1.74102	0.0816803	0.297561
LOC108696219	4.14764	0.464727	1.88118	0.24704	0.804877	1
LOC108696220	33.9097	-0.131933	0.578298	-0.228141	0.819537	0.924131
LOC108696223	2.51295	4.85645	3.68863	1.3166	0.187973	1
LOC108696228	4.52581	-0.0712992	2.17855	-0.0327278	0.973892	1
LOC108696235	1294.88	-0.229213	0.203259	-1.12769	0.259451	0.536531
LOC108696237	303.395	0.368267	0.245178	1.50204	0.133087	0.380323
LOC108696238	24.815	1.35975	1.82118	0.746629	0.455288	0.706848
LOC108696239	33.8786	0.756841	0.679629	1.11361	0.265447	0.542381
LOC108696241	110.545	0.149206	0.204526	0.729523	0.465682	0.715583
LOC108696242	120.13	-0.176463	0.237463	-0.74312	0.457409	0.708485
LOC108696243	27.4819	0.803291	0.655754	1.22499	0.220579	0.493708
LOC108696244	50.2724	-0.757815	0.418988	-1.80868	0.0705007	0.276049
LOC108696248	14.9966	4.32403	1.49043	2.90118	0.00371755	0.0492647
LOC108696251	126.56	-3.78766	1.52103	-2.49019	0.0127675	0.108737
LOC108696252	2.63446	4.23177	2.57888	1.64094	0.100811	1
LOC108696253	411.247	0.121758	0.213425	0.570494	0.568343	0.787485
LOC108696254	103.716	1.59475	0.303959	5.24658	1.54947e-07	1.07175e-05
LOC108696255	5.41237	0.553842	1.56441	0.354026	0.723319	1
LOC108696259	1.68606	4.57773	3.29513	1.38924	0.164759	1
LOC108696261	4.44272	2.02146	1.49338	1.35361	0.17586	1
LOC108696263	126.945	-0.459431	0.298668	-1.53826	0.123984	0.367477	X
LOC108696264	78.0525	-1.40517	0.462437	-3.03861	0.00237671	0.0357998
LOC108696265	2.14821	4.02776	3.7627	1.07044	0.284419	1
LOC108696266	2.6979	3.26575	2.9355	1.1125	0.265922	1
LOC108696267	11.2685	1.34426	0.935551	1.43687	0.150755	0.406084
LOC108696270	19.8076	-0.355063	0.735037	-0.483055	0.629057	0.826006
LOC108696272	21.2673	2.35992	1.35098	1.74682	0.0806684	0.295393
LOC108696273	4.39656	1.71397	1.84854	0.927205	0.35382	1
LOC108696274	11.4521	6.33213	3.47492	1.82224	0.0684191	0.272723
LOC108696275	4.54933	2.89747	2.90576	0.997148	0.318692	1
LOC108696277	10.2668	0.658218	0.977777	0.673178	0.500834	0.741768
LOC108696279	93.9029	-1.23441	0.281534	-4.38457	1.16213e-05	0.000482081
LOC108696281	4.17013	0.437129	1.59513	0.27404	0.784054	1
LOC108696284	10.4397	3.09016	1.44112	2.14428	0.0320108	0.184629
LOC108696285	2.09625	0.811106	2.55614	0.317316	0.751004	1
LOC108696290	3.26857	5.0882	4.11864	1.23541	0.216679	1
LOC108696293	6.30078	1.17162	1.25716	0.931959	0.351358	0.621878
LOC108696296	706.975	-3.27604	0.397824	-8.23488	1.79743e-16	4.9185e-14
LOC108696297	6.48436	6.18236	2.76188	2.23846	0.0251909	0.162605
LOC108696298	4.5508	3.65688	2.64989	1.38001	0.167582	1
LOC108696299	5.43528	0.923603	1.21427	0.760624	0.446881	1
LOC108696300	76.9937	-0.0362601	0.329734	-0.109968	0.912435	0.965352
LOC108696301	3.76598	1.40421	2.63297	0.533317	0.593814	1
LOC108696302	2.99771	5.08203	3.62958	1.40017	0.161462	1
LOC108696303	4.11665	-0.456996	1.99662	-0.228885	0.818959	1
LOC108696305	8.1998	3.17982	1.43341	2.21837	0.0265299	0.166967
LOC108696306	46.6071	0.644414	0.68307	0.943408	0.345472	0.616824
LOC108696307	2.27332	3.28095	3.24511	1.01104	0.311995	1
LOC108696308	2033.73	-0.281552	0.241846	-1.16418	0.244353	0.520633
LOC108696309	134.21	-0.292856	0.204828	-1.42977	0.152783	0.408788
LOC108696310	8.29519	4.57596	1.91624	2.38799	0.016941	0.129234
LOC108696311	39.7484	2.26173	1.29029	1.75288	0.0796222	0.293405
LOC108696313	9.46563	0.965152	0.883298	1.09267	0.274539	0.551749
LOC108696314	4.64812	5.44769	3.43773	1.58468	0.11304	1
LOC108696315	128.925	-0.184366	0.26959	-0.683877	0.494053	0.737251
LOC108696316	5.03826	0.915963	2.10455	0.435229	0.663396	1
LOC108696317	3.29448	4.30167	2.92193	1.4722	0.140967	1
LOC108696319	5.73709	2.06174	1.35663	1.51975	0.128573	1
LOC108696320	35.2351	-1.17358	0.533116	-2.20136	0.0277107	0.170448
LOC108696321	42.6424	-0.388883	0.541545	-0.718099	0.472696	0.721029
LOC108696325	73.0512	0.674035	0.36748	1.83421	0.0666229	0.268759
LOC108696327	6.6808	1.52922	1.27632	1.19815	0.230859	0.506516
LOC108696328	157.319	-0.492756	0.262523	-1.877	0.0605181	0.256957
LOC108696331	64.7273	-0.372969	0.367597	-1.01462	0.310289	0.584568
LOC108696333	7.98631	1.82481	1.33703	1.36482	0.172309	0.434043
LOC108696334	125	-0.103727	0.248144	-0.418013	0.675937	0.852058
LOC108696336	10.127	4.24068	2.63011	1.61236	0.106884	0.340771
LOC108696337	23.7163	2.02901	1.08826	1.86446	0.0622577	0.260234
LOC108696340	39.9858	3.03768	1.30301	2.33129	0.0197381	0.141612
LOC108696346	2.02555	4.58909	3.75686	1.22152	0.221889	1
LOC108696349	45.3874	0.368942	0.414065	0.891025	0.372916	0.640977
LOC108696353	2.70496	-0.392366	1.9578	-0.200412	0.841158	1
LOC108696354	3.45076	1.15395	2.52732	0.45659	0.647966	1
LOC108696356	2.69452	4.31164	3.3484	1.28767	0.197861	1
LOC108696357	133.478	-0.151052	0.267221	-0.565268	0.571892	0.789994
LOC108696358	195.235	0.107681	0.236083	0.456116	0.648306	0.836425
LOC108696359	277.981	-0.0297302	0.34064	-0.0872776	0.930451	0.972735
LOC108696360	3.44878	5.62351	2.70971	2.07532	0.0379571	1
LOC108696362	2.55529	5.28401	4.21046	1.25497	0.209489	1
LOC108696365	2.80177	5.74339	3.63675	1.57926	0.114275	1
LOC108696366	235.416	0.393291	0.227594	1.72804	0.0839818	0.301787
LOC108696368	216.456	-0.106229	0.247247	-0.429648	0.667451	0.847278
LOC108696370	4.34481	0.309965	1.68521	0.183933	0.854066	1
LOC108696372	4.48183	1.49033	1.66151	0.89697	0.369735	1
LOC108696373	1.82757	0.718716	2.1236	0.338442	0.73503	1
LOC108696374	176.887	-0.103913	0.320972	-0.323745	0.746131	0.88881
LOC108696377	354.645	-0.0368888	0.200095	-0.184356	0.853734	0.939972
LOC108696378	2.38003	2.10822	2.50824	0.840519	0.400618	1
LOC108696379	607.218	0.417477	0.248062	1.68295	0.0923838	0.31631		X
LOC108696380	23.1586	0.575131	0.706621	0.813917	0.415692	0.675188
LOC108696382	29.0156	0.567738	1.00282	0.566139	0.571299	0.789743
LOC108696383	0.976288	1.5599	2.84261	0.548755	0.583173	1
LOC108696384	18.3008	-0.23954	0.72327	-0.33119	0.740501	0.886125
LOC108696387	3.0813	1.77019	2.26804	0.780493	0.4351	1
LOC108696388	4.27414	0.387904	1.17894	0.329029	0.742134	1
LOC108696390	10.7116	7.14183	2.415	2.95729	0.00310361	0.0433889
LOC108696393	3.52884	5.60329	3.54739	1.57955	0.114209	1
LOC108696394	69.2164	0.0124737	0.336289	0.0370921	0.970412	0.988227
LOC108696396	3.95088	-0.237483	2.70161	-0.0879045	0.929953	1
LOC108696399	53.7516	0.383802	0.436956	0.878354	0.379752	0.646894
LOC108696402	684.767	0.0691235	0.224879	0.30738	0.758554	0.895058
LOC108696403	149.293	0.404402	0.211526	1.91183	0.0558974	0.246986
LOC108696405	84.965	-0.0524772	0.273241	-0.192055	0.847699	0.937141
LOC108696408	10.4268	2.19386	0.916333	2.39417	0.016658	0.127928
LOC108696409	10.3776	6.12741	2.07973	2.94625	0.00321655	0.0445363
LOC108696410	10.9035	4.47454	3.46906	1.28984	0.197105	0.466023
LOC108696411	3.6335	1.163	2.59334	0.448456	0.653824	1
LOC108696412	10.2932	2.63415	1.85374	1.421	0.155318	0.412107
LOC108696414	1.12361	2.64417	2.67736	0.987604	0.323347	1
LOC108696416	97.2484	-0.924013	0.314589	-2.93721	0.00331183	0.0455322		X
LOC108696417	42.4924	1.10547	0.441897	2.50165	0.0123616	0.107067
LOC108696418	46.6257	0.0329756	0.343537	0.0959884	0.92353	0.970017
LOC108696419	52.2718	-0.175802	0.452958	-0.38812	0.697927	0.863807
LOC108696420	3.57662	1.268	2.23256	0.567958	0.570063	1
LOC108696422	3.05693	3.49387	3.3082	1.05613	0.290911	1
LOC108696423	21.5714	4.72726	2.40062	1.96918	NA	1
LOC108696425	412.488	0.248922	0.184327	1.35043	0.176877	0.440047
LOC108696426	5.00565	3.42579	1.76126	1.94508	0.0517658	1
LOC108696429	94.4587	-0.96958	0.386075	-2.51138	0.0120261	0.105372
LOC108696431	37.4916	0.155024	0.534667	0.289946	0.771858	0.901747
LOC108696441	22.7144	-1.12272	0.571503	-1.96451	0.0494713	0.231512
LOC108696447	457.051	0.789932	0.221092	3.57287	0.00035309	0.00846779
LOC108696448	76.0945	0.869098	0.309161	2.81115	0.00493651	0.0599192
LOC108696452	21.3128	1.76447	0.910897	1.93707	0.0527373	0.239119
LOC108696457	460.92	0.302548	0.213409	1.41769	0.15628	0.41343
LOC108696458	1.77277	-0.231709	3.87676	-0.0597686	0.95234	1
LOC108696459	619.964	-0.468003	0.233291	-2.00609	0.0448467	0.219804
LOC108696468	1.61633	2.43939	2.98529	0.817136	0.41385	1
LOC108696471	257.601	-0.0201429	0.209259	-0.0962579	0.923316	0.969858
LOC108696472	650.992	-0.114145	0.272854	-0.418336	0.675701	0.852036
LOC108696473	4.42194	5.27656	3.53857	1.49115	0.135921	1
LOC108696474	14.838	2.43738	1.41483	1.72274	0.084936	0.303225
LOC108696475	13.3428	1.80786	1.15797	1.56123	0.118469	0.358208
LOC108696476	1.21764	1.7434	3.1454	0.554269	0.579395	1
LOC108696479	20.8682	4.806	2.34692	2.04779	0.0405807	0.209242
LOC108696480	1.8737	4.25742	3.69775	1.15136	0.249586	1
LOC108696481	22.3385	2.94997	1.15191	2.56093	0.0104393	0.0964614
LOC108696483	9.0891	0.225936	0.876544	0.257758	0.796594	0.91309
LOC108696484	335.767	-0.173446	0.264498	-0.655756	0.511981	0.749111		X
LOC108696486	35.7754	0.610615	0.481286	1.26872	0.204542	0.474049
LOC108696489	29.9241	4.38813	1.64766	2.66325	0.00773909	0.0805274
LOC108696492	1.75602	4.88239	3.23756	1.50805	0.131542	1
LOC108696493	2.98553	4.68103	2.79738	1.67336	0.0942558	1
LOC108696494	5.32998	1.95706	1.57056	1.24609	0.21273	1
LOC108696496	2.27888	3.84305	4.24577	0.905148	0.365387	1
LOC108696498	1.39983	0.867681	2.65139	0.327255	0.743475	1
LOC108696500	24.2735	2.30927	1.11079	2.07894	0.0376229	0.200315
LOC108696501	5.23482	3.07341	2.18023	1.40968	0.158635	1
LOC108696502	3.53043	5.60368	3.58114	1.56478	0.117636	1
LOC108696503	4.20361	-0.177198	1.53832	-0.115189	0.908295	1
LOC108696504	6.9717	-1.46181	1.49418	-0.978336	0.327908	0.600374
LOC108696506	37.2398	-0.142654	0.390849	-0.364986	0.715122	0.872301
LOC108696507	6.22473	5.85789	2.79468	2.09609	0.0360746	0.196804
LOC108696509	3.55946	4.54937	3.30275	1.37745	0.168374	1
LOC108696514	7.31834	1.47681	1.77875	0.83025	0.406397	0.667803
LOC108696515	160.315	-1.43191	0.243965	-5.86934	4.37529e-09	4.26522e-07
LOC108696518	2.3392	5.60438	3.64588	1.53718	0.124248	1
LOC108696519	41.8591	1.02409	0.563553	1.81719	0.0691873	0.273833
LOC108696520	4.54824	-0.685837	1.27112	-0.539551	0.589506	1
LOC108696523	5.14974	2.62408	1.55781	1.68447	0.092091	1
LOC108696525	1204.51	0.0877954	0.310148	0.283076	0.777119	0.903764
LOC108696526	11.5447	6.37275	3.56558	1.7873	0.0738891	0.283305
LOC108696527	9.7615	0.709249	2.33652	0.303549	0.761472	0.896348
LOC108696529	182.221	0.0434728	0.195498	0.222369	0.824026	0.926354
LOC108696531	433.907	-0.432035	0.185597	-2.32782	0.0199219	0.142213
LOC108696532	6.17793	1.48004	1.88049	0.787049	0.431253	0.687864
LOC108696533	5.70902	2.56931	2.11535	1.2146	0.224518	1
LOC108696536	1.62434	3.23964	4.32855	0.748436	0.454197	1
LOC108696537	21.3434	0.388602	0.849009	0.457713	0.647159	0.835714
LOC108696538	374.8	-0.450436	0.248061	-1.81583	0.0693967	0.274307
LOC108696539	14.2113	0.425546	0.796374	0.534355	0.593096	0.803978
LOC108696540	195.618	0.215479	0.282651	0.762348	0.445852	0.699515
LOC108696542	1.95456	3.1219	3.39493	0.919576	0.357794	1
LOC108696548	3.06694	-0.538206	1.57224	-0.342318	0.732112	1
LOC108696549	115.574	-0.236711	0.242889	-0.974562	0.329778	0.602484
LOC108696551	3.9449	1.43295	2.27982	0.628537	0.529652	1
LOC108696552	95.4836	-0.634479	0.260164	-2.43877	0.0147375	0.118336
LOC108696553	1.95206	2.91401	2.33679	1.24701	0.212393	1
LOC108696554	244.847	-0.918136	0.22727	-4.03985	5.34865e-05	0.0017845
LOC108696555	133.392	0.148029	0.192464	0.769125	0.441819	0.696361
LOC108696556	19.9257	1.37758	0.956669	1.43998	0.149874	0.404826
LOC108696557	268.583	-0.0750901	0.187421	-0.400651	0.688677	0.859126
LOC108696560	178.503	-0.135812	0.215932	-0.628956	0.529378	0.760822
LOC108696561	475.89	-0.124439	0.198019	-0.628418	0.52973	0.76093
LOC108696562	3.56969	0.575671	2.2251	0.258717	0.795854	1
LOC108696563	91.6579	-1.14894	0.276885	-4.14951	3.33191e-05	0.00119196
LOC108696564	3.44925	5.27677	3.55287	1.48521	0.137487	1
LOC108696565	6.23661	5.74069	3.39178	1.69253	0.0905451	0.313144
LOC108696566	10.2873	1.48735	1.48436	1.00201	0.316337	0.590658
LOC108696568	12.0189	1.0528	0.934535	1.12655	0.259932	0.537106
LOC108696570	183.163	-0.238226	0.260555	-0.914302	0.360558	0.630578
LOC108696573	1.92731	2.69049	3.40635	0.789845	0.429618	1
LOC108696575	6.0045	6.27962	2.30644	2.72264	0.00647619	0.0714578
LOC108696576	4.10329	1.63059	2.0404	0.799152	0.424202	1
LOC108696580	1.12361	0	4.10503	0	1	1
LOC108696581	70.5851	-0.0933742	0.36501	-0.255813	0.798095	0.913703
LOC108696584	14.5082	1.48076	1.16926	1.26641	0.205367	0.475219
LOC108696586	6.85448	2.83499	1.98899	1.42534	0.154059	0.410523
LOC108696587	34.8075	-0.580905	0.546434	-1.06308	0.287744	0.563737
LOC108696590	28.7884	0.474906	0.665984	0.71309	0.47579	0.723718
LOC108696592	20.4432	-0.0325947	0.834651	-0.0390519	0.968849	0.987623
LOC108696593	53.789	0.0372795	0.403393	0.0924147	0.926369	0.971234
LOC108696594	108.721	0.1622	0.237862	0.681909	0.495297	0.73805
LOC108696596	2.73247	2.17356	2.55257	0.851519	0.394481	1
LOC108696597	1.28538	3.47532	2.83953	1.22391	0.220987	1
LOC108696606	2.7592	0.736906	1.6929	0.435292	0.663351	1
LOC108696608	11.4624	2.4999	1.80418	1.38562	0.165864	0.42617
LOC108696610	426.263	0.307976	0.241757	1.27391	0.202696	0.472207
LOC108696613	108.298	-0.596117	0.263542	-2.26195	0.0237008	0.157353
LOC108696618	154.203	-0.0304665	0.224057	-0.135977	0.891839	0.957197
LOC108696619	620.6	-1.48579	0.285109	-5.21131	1.87508e-07	1.27159e-05
LOC108696620	183.757	-1.04371	0.249682	-4.18014	2.91326e-05	0.0010592
LOC108696621	1.44421	3.68358	3.75916	0.979896	0.327137	1
LOC108696623	162.18	-0.102421	0.243827	-0.420056	0.674445	0.851405
LOC108696628	37.0079	3.1303	0.399634	7.83293	4.76647e-15	1.07746e-12
LOC108696629	295.2	3.47519	0.231551	15.0083	6.48136e-51	1.68488e-47
LOC108696630	3.72967	3.18167	2.89476	1.09911	0.271718	1
LOC108696632	1.04446	2.84761	3.2611	0.873206	0.382551	1
LOC108696633	1.76139	3.28109	3.21709	1.0199	0.307778	1
LOC108696634	2.23459	0.719605	2.35917	0.305024	0.760348	1
LOC108696636	186.555	0.332098	0.178299	1.86259	0.0625195	0.260665
LOC108696637	2.9644	1.71012	3.30311	0.517732	0.604645	1
LOC108696639	16.23	0.778497	0.767135	1.01481	0.310196	0.584491
LOC108696640	5.5359	1.24022	1.94088	0.639	0.522823	1
LOC108696641	0.957067	3.06521	3.18959	0.961005	0.336549	1
LOC108696642	6.60806	2.44863	2.57049	0.952592	0.340797	0.612782
LOC108696643	3.67158	5.96122	3.15314	1.89057	0.0586824	1
LOC108696645	10.4537	0.69075	0.931693	0.741392	0.458456	0.709321
LOC108696650	13.0927	2.25724	1.7994	1.25444	0.209683	0.480838
LOC108696652	6.7903	2.49845	1.89794	1.3164	0.188039	0.453978
LOC108696656	577.971	-0.224766	0.258217	-0.870453	0.384053	0.649648
LOC108696658	8.73576	3.35827	2.55054	1.31669	0.187943	0.453853
LOC108696659	19.6941	1.05576	0.654139	1.61397	0.106533	0.340398
LOC108696660	13.1602	1.02339	0.792018	1.29213	0.19631	0.464777
LOC108696663	8.34359	1.51671	1.46948	1.03214	0.302006	0.577091
LOC108696666	10.1134	3.67766	1.55963	2.35804	0.0183716	0.135999
LOC108696667	78.8859	2.08686	0.59389	3.51388	0.00044162	0.0101595
LOC108696671	1.93134	3.61862	3.38602	1.06869	0.285208	1
LOC108696673	76.1074	0.103979	0.263075	0.395245	0.692662	0.860963
LOC108696675	2.59088	5.45531	4.15802	1.312	0.189522	1
LOC108696676	11.5382	4.0256	1.90698	2.11098	0.0347737	0.193261
LOC108696677	21.5775	0.0410477	0.951655	0.0431329	0.965596	0.986022
LOC108696678	1.5019	4.59722	4.27926	1.0743	0.282687	1
LOC108696681	3.22505	1.30925	1.99636	0.655821	0.51194	1
LOC108696683	78.0099	0.546247	0.285583	1.91274	0.0557812	0.246838
LOC108696684	16.0024	6.14097	2.7558	2.22838	0.0258552	0.164973		X
LOC108696685	5.63336	1.33277	2.34748	0.567744	0.570209	1
LOC108696689	184.374	-0.106377	0.226494	-0.469669	0.638592	0.831214
LOC108696690	7.80153	1.94856	1.87739	1.03791	0.299313	0.574613
LOC108696692	5.1896	1.07734	2.19033	0.49186	0.622818	1
LOC108696693	2.86982	2.64509	2.10912	1.25412	0.209798	1
LOC108696695	90.3213	0.200179	0.300044	0.667164	0.504667	0.743538
LOC108696697	22.7354	-1.52158	0.831918	-1.82901	0.0673985	0.270628
LOC108696698	5.43443	0.441656	1.22665	0.360052	0.718808	1
LOC108696702	7.36332	2.70554	1.49514	1.80955	0.0703652	0.275802
LOC108696704	13.489	1.15382	0.983972	1.17261	0.240952	0.516908
LOC108696706	1.64752	3.8442	4.30103	0.893787	0.371436	1
LOC108696707	5.97376	5.97955	3.01139	1.98565	0.0470727	0.225427
LOC108696708	3.50031	5.98961	4.02974	1.48635	0.137187	1
LOC108696709	370.369	0.382093	0.191624	1.99397	0.0461554	0.222916
LOC108696710	7.1162	4.49428	2.61969	1.71558	0.0862392	0.30543
LOC108696711	2.42214	4.53041	3.26716	1.38665	0.165548	1
LOC108696712	10.8036	4.76591	2.48887	1.91489	0.0555066	0.246166
LOC108696713	247.624	-0.178976	0.18782	-0.95291	0.340636	0.612633
LOC108696714	6.38493	1.15393	0.975867	1.18246	0.237022	0.513251
LOC108696715	12.9355	0.29074	1.01066	0.287673	0.773597	0.902621
LOC108696716	5.12498	5.04711	2.52041	2.00249	0.0452319	1
LOC108696717	12.0079	4.53201	1.98114	2.28757	0.0221624	0.151394
LOC108696718	3.80855	1.3188	2.45083	0.538101	0.590507	1
LOC108696719	8.85764	1.72005	1.53538	1.12027	0.262597	0.538954
LOC108696724	5.13612	4.55853	2.82746	1.61223	0.106911	1
LOC108696725	135.264	0.22009	0.194191	1.13337	0.257059	0.534503
LOC108696729	54.6219	0.184471	0.376304	0.490219	0.623979	0.822837		X
LOC108696730	56.4238	-0.507965	0.29635	-1.71407	0.0865152	0.306269
LOC108696731	1.65993	3.8442	4.30103	0.893787	0.371436	1
LOC108696734	4.16133	2.26625	2.68802	0.843091	0.399177	1
LOC108696736	8.69291	2.61503	1.52341	1.71656	0.0860594	0.305249
LOC108696737	3.79212	1.42071	1.80935	0.785207	0.432332	1
LOC108696741	80.3726	-0.422128	0.247388	-1.70634	0.0879448	0.308772
LOC108696742	38.6935	-0.248349	0.44618	-0.556612	0.577792	0.794264
LOC108696743	90.559	0.265184	0.252424	1.05055	0.293465	0.568532
LOC108696744	36.7945	0.377529	0.383153	0.98532	0.324467	0.597188
LOC108696748	13.2067	5.04383	1.7725	2.8456	0.00443283	0.0556284
LOC108696749	7.58283	6.536	3.25278	2.00936	0.0444992	0.218875
LOC108696750	3.96177	2.25745	2.21305	1.02006	0.307699	1
LOC108696751	2.53844	4.25697	3.68014	1.15674	0.247378	1
LOC108696752	23.4165	2.25584	0.871633	2.58806	0.00965191	0.0918354
LOC108696753	5.32691	3.59746	2.77133	1.2981	0.194253	1
LOC108696757	15.301	1.81436	1.25471	1.44604	0.148166	0.402042
LOC108696758	215.049	-0.656426	0.182884	-3.5893	0.000331564	0.00803038
LOC108696759	4.99167	3.29277	1.91001	1.72395	0.0847162	1
LOC108696761	9.21166	4.05433	2.14409	1.89094	0.0586327	0.252806
LOC108696763	73.3848	0.317649	0.432359	0.734688	0.462529	0.712911
LOC108696765	212.244	-0.127107	0.21978	-0.578338	0.563036	0.783249
LOC108696767	1.6877	4.69216	2.69374	1.74187	0.0815307	1
LOC108696768	3.28236	5.08157	3.60033	1.41142	0.158122	1
LOC108696771	143.525	-0.46134	0.228919	-2.0153	0.0438734	0.21727
LOC108696772	7.0775	0.65123	1.5311	0.425336	0.670592	0.848966
LOC108696775	48.4132	-0.119175	0.433694	-0.27479	0.783477	0.907207
LOC108696776	163.636	0.300204	0.257045	1.1679	0.242845	0.518897
LOC108696777	201.723	0.400701	0.211506	1.89451	0.058157	0.25194
LOC108696778	267.106	0.439868	0.217129	2.02584	0.0427812	0.214543
LOC108696780	27.0546	5.18464	3.29464	1.57366	0.115566	0.353785
LOC108696781	114.165	0.597886	0.324077	1.84489	0.0650532	0.265724
LOC108696783	44.1181	0.385631	0.64412	0.598695	0.549377	0.77417	X
LOC108696784	152.442	-0.0955996	0.279248	-0.342347	0.73209	0.880992
LOC108696785	11.6059	4.14777	1.82183	2.2767	0.0228039	0.153643
LOC108696786	1.39913	3.21877	3.78052	0.851409	0.394542	1
LOC108696787	765.639	-0.140696	0.196436	-0.716245	0.47384	0.721926
LOC108696788	23.8982	0.314372	0.486444	0.646265	0.518108	0.75304
LOC108696791	1.34273	1.72388	3.78356	0.455624	0.64866	1
LOC108696793	5.90972	2.92068	2.12446	1.37479	0.169198	0.430411
LOC108696794	8.8364	1.96291	1.61823	1.213	0.225131	0.499854
LOC108696797	5.84637	2.07643	1.59702	1.30019	0.193534	1
LOC108696798	37.3585	-0.31489	0.541746	-0.58125	0.561072	0.782045	X
LOC108696800	301.987	-0.76437	0.2307	-3.31327	0.000922131	0.0177567	X
LOC108696801	4.17746	5.05479	2.59389	1.94873	0.0513274	1
LOC108696802	18.958	0.784015	1.04709	0.748759	0.454002	0.705625
LOC108696803	6.69239	-4.17168	1.70386	-2.44837	0.0143503	0.116926
LOC108696804	47.3059	0.495141	0.44807	1.10505	0.269137	0.546205
LOC108696805	254.13	0.0880943	0.229565	0.383744	0.701168	0.865448
LOC108696808	1.8442	2.33245	2.76464	0.843672	0.398852	1
LOC108696809	5.13032	5.74253	2.98134	1.92616	0.0540844	1
LOC108696811	18.6131	3.8419	1.27013	3.02481	0.00248789	0.0369922
LOC108696814	6.48109	6.47535	3.30437	1.95963	0.0500388	0.232979
LOC108696815	4.64391	4.3533	2.33025	1.86817	0.061739	1
LOC108696816	3.57661	1.83839	2.84929	0.645208	0.518792	1
LOC108696817	8.58654	4.17148	2.25505	1.84984	0.0643373	0.264218
LOC108696818	4.68752	4.6282	2.81542	1.64388	0.100202	1
LOC108696820	8.36178	2.56381	1.77222	1.44667	0.14799	0.401789
LOC108696821	3.24539	4.86249	4.10844	1.18354	0.236597	1
LOC108696822	6.43267	6.45829	3.3667	1.91828	0.055075	0.245017
LOC108696823	3.12067	3.02658	2.75456	1.09875	0.271875	1
LOC108696824	889.755	-0.596155	0.212658	-2.80336	0.00505739	0.0608599
LOC108696825	4.26553	0.143924	1.58051	0.0910617	0.927444	1
LOC108696829	6.45915	6.37128	2.9936	2.1283	0.0333122	0.188907
LOC108696830	8.47069	2.25618	1.12978	1.99701	0.045824	0.222187
LOC108696831	4.64714	5.28154	3.94005	1.34047	0.180091	1
LOC108696832	15.8043	1.13207	0.920241	1.23019	0.218628	0.491184
LOC108696834	155.399	-0.0363825	0.325632	-0.111729	0.911038	0.964692
LOC108696836	353.957	0.511198	0.360371	1.41853	0.156035	0.413024
LOC108696837	27.158	-0.361382	1.76273	-0.205013	0.837562	0.932601
LOC108696839	203.268	-0.221553	0.22569	-0.981669	0.326263	0.598833
LOC108696841	87.8201	0.0169551	0.498091	0.0340401	0.972845	0.989111
LOC108696842	10.1337	4.17393	2.27974	1.83088	0.0671183	0.269953
LOC108696843	43.6104	0.439876	0.817783	0.537888	0.590654	0.802591	X
LOC108696844	364.555	-0.0462593	0.169765	-0.272491	0.785245	0.90819
LOC108696845	15.436	0.793682	1.2323	0.644068	0.519531	0.754049
LOC108696846	40.4869	0.301293	0.46832	0.643349	0.519998	0.754377
LOC108696848	423.259	-0.0454832	0.182974	-0.248578	0.803687	0.916031
LOC108696849	4.19842	0.280222	1.73874	0.161164	0.871964	1
LOC108696851	16.1895	5.41862	3.00042	1.80595	0.0709257	0.276877
LOC108696852	117.085	-0.124415	0.241989	-0.514134	0.607158	0.813074
LOC108696855	9.6559	6.64379	2.63481	2.52154	0.0116842	0.103518
LOC108696856	81.2169	0.39579	0.326506	1.2122	0.225437	0.500107
LOC108696860	1.77116	-1.22366	2.54436	-0.480931	0.630566	1
LOC108696862	78.3883	0.412181	0.418249	0.985492	0.324383	0.597182
LOC108696863	665.033	-0.334487	0.202691	-1.65022	0.098897	0.327261
LOC108696864	36.2289	0.254187	0.68131	0.373085	0.709085	0.869222
LOC108696865	11.7478	2.3332	1.2214	1.91027	0.0560988	0.24749
LOC108696870	3.3058	5.08822	4.12136	1.2346	0.21698	1
LOC108696873	811.576	-0.395072	0.285692	-1.38286	0.166708	0.427107
LOC108696874	4.38794	6.2877	3.46238	1.81601	0.0693692	1
LOC108696875	4.17376	6.28805	3.50795	1.79252	0.0730503	1
LOC108696876	5.6567	5.9121	3.03884	1.94552	0.051713	1
LOC108696879	11.148	1.47936	1.78059	0.830827	0.406071	0.667624
LOC108696880	339.921	0.23931	0.192199	1.24512	0.213088	0.484779		X
LOC108696881	12.3232	0.914357	1.20658	0.757806	0.448567	0.701617
LOC108696882	23.9395	0.230231	0.850962	0.270554	0.786734	0.908925
LOC108696883	7.07267	3.86011	2.60653	1.48094	0.138623	0.388585
LOC108696884	7.61472	0.893125	1.25725	0.710379	0.477469	0.724934
LOC108696885	55.5785	4.78272	1.77318	2.69726	0.00699137	0.0751795
LOC108696886	15.2971	5.12854	2.97675	1.72287	0.0849127	0.303225
LOC108696887	2.24911	4.86423	4.26504	1.14049	0.254083	1
LOC108696888	59.0097	5.74492	1.92294	2.98756	0.00281211	0.040407
LOC108696889	322.461	2.22927	0.727393	3.06474	0.00217857	0.0336105
LOC108696890	128.807	2.34664	0.780418	3.0069	0.00263922	0.038714
LOC108696891	19.6152	5.45842	3.19219	1.70993	0.0872787	0.307367
LOC108696892	127.361	0.741835	0.197568	3.75483	0.00017346	0.00471759
LOC108696893	19.9907	3.72858	2.4847	1.50062	0.133455	0.380781
LOC108696894	2.41996	4.73946	3.30617	1.43352	0.151709	1
LOC108696895	246.124	-0.0484133	0.245539	-0.197172	0.843693	0.935853
LOC108696896	13.0603	5.77355	2.17003	2.66059	0.00780048	0.080926
LOC108696897	9.74573	5.88148	4.25389	1.38261	0.166784	0.427231
LOC108696898	3.78337	3.55747	2.62013	1.35774	0.174545	1
LOC108696899	5.92365	2.50181	1.99008	1.25714	0.208702	0.479437
LOC108696900	1.30405	3.218	3.76451	0.854825	0.392648	1
LOC108696902	2.37457	4.45558	3.67706	1.21172	0.225618	1
LOC108696903	6.41319	3.58639	2.38704	1.50244	0.132983	0.380234
LOC108696904	2.0558	3.26686	2.95459	1.10569	0.26886	1
LOC108696905	1.81362	2.02477	3.38727	0.597757	0.550002	1
LOC108696906	12.2323	0.571313	0.740715	0.771299	0.44053	0.695602
LOC108696907	1.90303	2.25771	2.22932	1.01273	0.311189	1
LOC108696908	4.77393	3.09665	1.84204	1.68109	0.0927445	1
LOC108696910	8.47113	1.96192	1.01707	1.929	0.0537307	0.241552
LOC108696911	14.3661	-1.56761	1.01144	-1.54987	0.121172	0.362829
LOC108696913	119.955	-0.512045	0.237337	-2.15746	0.03097	0.180864
LOC108696914	4.27669	1.0377	1.83359	0.565938	0.571436	1
LOC108696916	13.8617	3.12775	1.2283	2.54641	0.0108839	0.0989088
LOC108696917	6.40433	5.55817	2.16123	2.57176	0.0101184	0.0948279
LOC108696918	1.51596	4.26923	4.2874	0.995762	0.319366	1
LOC108696919	18.2894	3.05779	1.34108	2.2801	0.022602	0.152976
LOC108696920	2.5265	2.56326	2.97006	0.863032	0.38812	1
LOC108696921	3.90575	5.74662	4.02594	1.4274	0.153466	1
LOC108696923	3.12954	4.59554	4.15018	1.10731	0.26816	1
LOC108696924	2.15402	3.2853	3.3584	0.978234	0.327958	1
LOC108696925	4.21826	5.60286	3.51121	1.59571	0.110554	1
LOC108696926	3.43309	2.43035	3.6798	0.660456	0.508962	1
LOC108696930	9.44885	4.67695	2.06567	2.26413	0.023566	0.157051
LOC108696931	4.63163	5.84988	2.51995	2.32143	0.0202638	1
LOC108696932	1.51033	1.71879	3.22499	0.532959	0.594062	1
LOC108696933	1.70696	3.83087	3.78021	1.0134	0.310869	1
LOC108696934	4.5197	6.19363	3.44581	1.79744	0.0722658	1
LOC108696935	5.51539	4.45515	3.06118	1.45537	0.145567	1
LOC108696936	31.7894	0.406172	0.496633	0.817851	0.413442	0.673616
LOC108696940	109.564	-0.0607908	0.24731	-0.245808	0.805831	0.917017
LOC108696941	2.13728	3.85314	2.41856	1.59315	0.111126	1
LOC108696942	14.0831	3.61682	1.51338	2.38989	0.0168533	0.128795
LOC108696943	4.00952	1.60642	1.58577	1.01302	0.311049	1
LOC108696944	203.414	5.12872	0.416553	12.3123	7.77958e-35	7.58388e-32
LOC108696945	2069.14	-0.538024	0.205618	-2.61662	0.00888043	0.0875277
LOC108696946	3.66494	5.9863	3.56969	1.67698	0.0935467	1
LOC108696947	62.8035	0.627394	0.287108	2.18522	0.0288725	0.174179
LOC108696948	19.2679	0.384688	0.844196	0.455685	0.648616	0.836521
LOC108696949	4.35678	6.30865	2.69585	2.34013	0.0192769	1
LOC108696950	3.98425	5.28213	3.06139	1.7254	0.0844549	1
LOC108696952	4.61576	1.14254	1.70806	0.66891	0.503553	1
LOC108696953	6.33478	5.59953	3.27153	1.71159	0.0869715	0.307109
LOC108696954	1.87432	4.40641	3.75777	1.17261	0.240951	1
LOC108696957	2.01727	3.61816	2.78874	1.29742	0.194488	1
LOC108696958	5.97094	0.176417	1.37006	0.128766	0.897542	0.958634
LOC108696959	4.56752	0.877314	1.30257	0.673526	0.500612	1
LOC108696961	162.448	2.26268	1.25912	1.79704	NA	1
LOC108696963	9.92196	5.28867	2.47583	2.13612	0.0326697	0.186641
LOC108696964	6.04282	5.98028	3.05687	1.95634	0.0504251	0.233801
LOC108696965	2.98499	3.55537	2.83734	1.25307	0.210182	1
LOC108696966	2.1225	4.26909	4.2777	0.997987	0.318286	1
LOC108696968	1.49608	1.72753	4.39128	0.393401	0.694023	1
LOC108696969	2.05091	1.45978	3.21996	0.453353	0.650295	1
LOC108696972	2.43564	3.62805	3.79704	0.955495	0.339327	1
LOC108696973	11.1761	5.94963	2.14145	2.77832	0.00546402	0.0640068
LOC108696974	7.38282	3.86016	2.32491	1.66035	0.096845	0.323777
LOC108696975	4.27269	5.73645	3.10544	1.84722	0.0647146	1
LOC108696979	2.43542	4.96235	2.65177	1.87134	0.0612986	1
LOC108696981	1.65828	4.26923	4.2874	0.995763	0.319365	1
LOC108696982	4.13515	5.05936	2.75946	1.83346	0.0667344	1
LOC108696983	4.11817	5.0249	3.61376	1.39049	0.16438	1
LOC108696984	3.10542	5.08236	3.65048	1.39224	0.163849	1
LOC108696985	3.77857	3.88535	3.25559	1.19344	0.232697	1
LOC108696986	6.83868	-0.900402	1.33183	-0.676064	0.499	0.740477
LOC108696988	2.24175	5.48143	3.15455	1.73763	0.082276	1
LOC108696990	2.08361	4.59722	4.27926	1.0743	0.282687	1
LOC108696991	4.19385	4.54245	2.93194	1.5493	0.12131	1
LOC108696992	50.7074	-2.28162	0.460899	-4.95037	7.40744e-07	4.2167e-05
LOC108696993	3.98456	2.26248	2.27033	0.99654	0.318988	1
LOC108696994	2.50866	5.53938	3.6593	1.51378	0.130081	1
LOC108696996	8.14024	-0.131627	0.908675	-0.144856	0.884825	0.954368
LOC108697000	33.6791	-1.0487	1.52085	-0.689548	0.490479	0.734507
LOC108697001	6.70335	6.37506	3.35635	1.8994	0.0575117	0.250432
LOC108697002	4.79916	2.93134	2.78016	1.05438	0.29171	1
LOC108697003	3.51987	4.69213	2.68485	1.74763	0.0805276	1
LOC108697004	5.07066	4.06102	2.79742	1.4517	0.146585	1
LOC108697005	3.29561	3.2479	3.29188	0.986639	0.32382	1
LOC108697006	3.17035	2.28182	2.57361	0.886623	0.375282	1
LOC108697007	2.11755	5.08951	4.25832	1.19519	0.232012	1
LOC108697008	29.5084	8.00377	3.29861	2.42641	NA	1
LOC108697009	61.627	-1.20864	0.321275	-3.76202	0.000168549	0.00462436
LOC108697011	1.708	4.537	3.611	1.25644	0.208957	1
LOC108697013	13.9728	5.13545	2.03706	2.52101	0.0117019	0.103587
LOC108697014	5.54807	3.40936	2.09003	1.63125	0.102838	1
LOC108697017	17.4987	7.72532	2.70683	2.85401	0.00431712	0.0547491
LOC108697019	1.70531	4.25877	3.75158	1.13519	0.256295	1
LOC108697022	175.627	-0.133818	0.276404	-0.484139	0.628287	0.825586
LOC108697024	2.21491	4.58694	3.65291	1.2557	0.209226	1
LOC108697025	34.2736	-0.510221	0.726139	-0.702649	0.482274	0.72855
LOC108697026	3.37173	3.02036	3.29128	0.917686	0.358783	1
LOC108697028	2.36275	1.73699	2.25723	0.769522	0.441583	1
LOC108697030	4.72228	0.243855	2.1592	0.112938	0.91008	1
LOC108697031	14.4453	2.27673	2.08093	1.09409	0.273915	0.55092
LOC108697032	2.86451	5.45018	3.6251	1.50346	0.132721	1
LOC108697034	3.57228	5.06018	2.77901	1.82086	0.0686284	1
LOC108697035	3.91234	5.08731	4.03346	1.26128	0.20721	1
LOC108697036	5.32765	4.33937	3.42417	1.26728	0.205057	1
LOC108697037	4.01738	5.50965	3.20701	1.718	0.0857958	1
LOC108697040	20.925	4.43128	3.35599	1.32041	NA	1
LOC108697041	6.0851	6.53298	2.9534	2.21202	0.0269654	0.16781
LOC108697042	5.99227	6.22844	3.03917	2.04939	0.0404243	0.20876
LOC108697043	1.49278	3.8442	4.30103	0.893786	0.371436	1
LOC108697044	1.99197	1.42277	3.78105	0.37629	0.706702	1
LOC108697045	3.00822	4.24415	3.28017	1.29388	0.195706	1
LOC108697046	5.72945	6.23963	2.61285	2.38805	0.0169378	1
LOC108697047	50.8058	0.179888	0.350409	0.513365	0.607696	0.813434
LOC108697048	1.69912	2.234	3.3841	0.660144	0.509161	1
LOC108697049	4.81403	5.44803	3.46099	1.57413	0.115458	1
LOC108697051	5.57746	1.84368	1.89311	0.973885	0.330114	1
LOC108697052	2.27229	5.08938	4.24365	1.19929	0.230414	1
LOC108697053	2.53541	4.59669	4.2371	1.08487	0.27798	1
LOC108697054	1.43308	4.2593	3.77378	1.12866	0.259043	1
LOC108697055	4.18819	4.32685	2.86619	1.50962	0.131141	1
LOC108697056	4.57075	-1.29378	1.3896	-0.931048	0.351829	1
LOC108697058	4.47164	1.83761	2.50883	0.732456	0.46389	1
LOC108697059	5.56249	5.86874	2.56163	2.29102	0.0219624	1
LOC108697060	16.8866	1.34992	0.827616	1.6311	0.102869	0.333993
LOC108697061	5.79114	5.27359	3.3571	1.57088	0.116211	1
LOC108697062	1.28012	2.71336	3.1724	0.855301	0.392385	1
LOC108697063	1.35219	3.21797	3.76394	0.854948	0.39258	1
LOC108697064	4.8215	5.86851	3.45669	1.69773	0.0895594	1
LOC108697066	7.34147	6.46032	3.66691	1.76179	0.0781048	0.291428
LOC108697067	4.04061	5.28233	4.01961	1.31414	0.188799	1
LOC108697068	4.26215	1.42474	1.80939	0.787418	0.431037	1
LOC108697069	6.0365	6.10927	2.2233	2.74784	0.00599895	0.067828
LOC108697071	2.09273	5.08943	4.2489	1.19782	0.230986	1
LOC108697083	1.12647	-2.45706	2.55012	-0.963506	0.335293	1
LOC108697094	4.14242	5.00381	2.70116	1.85247	0.063959	1
LOC108697098	5.65087	5.32595	2.59209	2.05469	0.0399087	1
LOC108697100	9.40157	0.382032	0.852318	0.448227	0.65399	0.83959
LOC108697101	1.93131	2.14528	2.9168	0.735489	0.462042	1
LOC108697102	1.50355	4.26926	4.2874	0.995769	0.319362	1
LOC108697106	4.0849	3.7362	2.84582	1.31287	0.189226	1
LOC108697107	5.92447	3.254	1.79598	1.81182	0.0700143	0.275275
LOC108697109	11.0398	-0.194365	1.52155	-0.127741	0.898354	0.958868	X
LOC108697110	1.67981	4.86386	4.23227	1.14923	0.25046	1
LOC108697111	2.59161	3.60962	2.89929	1.245	0.21313	1
LOC108697112	96.3553	-4.00047	0.616417	-6.48988	8.5907e-11	1.07625e-08
LOC108697113	3.56783	2.66232	2.29251	1.16131	0.245516	1
LOC108697114	1.56249	2.56362	4.36385	0.587468	0.556889	1
LOC108697119	2.72574	4.86345	4.19296	1.15991	0.246086	1
LOC108697120	3.14942	5.28342	4.13944	1.27636	0.201828	1
LOC108697122	1.99939	3.27159	3.04137	1.0757	0.282063	1
LOC108697123	4.46521	5.69891	2.66016	2.14232	0.0321678	1
LOC108697125	1.42038	-1.65633	3.25225	-0.509289	0.61055	1
LOC108697127	518.683	-0.912555	0.210227	-4.34082	1.41955e-05	0.000574355
LOC108697129	13.4601	-0.144521	0.859654	-0.168115	0.866493	0.946371
LOC108697132	288.292	-0.570242	0.160506	-3.55279	0.000381176	0.00902868
LOC108697133	28.0144	2.54359	0.952843	2.66948	0.00759691	0.0795521
LOC108697135	91.8218	0.0339506	0.214678	0.158147	0.874341	0.949723
LOC108697138	2.38232	4.26885	4.262	1.00161	0.316534	1
LOC108697140	2.30213	2.31254	3.77014	0.613383	0.539623	1
LOC108697141	17.6676	2.63252	1.45554	1.80862	0.0705101	0.276049
LOC108697142	101.792	-0.165429	0.230577	-0.717456	0.473093	0.721324
LOC108697143	153.987	-0.542811	0.229133	-2.36898	0.0178373	0.13359
LOC108697144	8.74763	2.81626	1.62596	1.73206	0.0832633	0.300382
LOC108697146	6.52263	6.04247	3.06013	1.97458	0.048316	0.228436
LOC108697147	23.4141	2.07735	2.34296	0.886636	NA	1
LOC108697149	2.29001	4.25696	3.67965	1.15689	0.247316	1
LOC108697150	1.59693	4.85719	3.73316	1.30109	0.193226	1
LOC108697151	4.41117	5.08057	3.53921	1.43551	0.151142	1
LOC108697152	6.88063	2.99769	2.66177	1.1262	0.260081	0.537193
LOC108697154	6.53249	0.705249	1.78091	0.396005	0.692102	0.860678
LOC108697157	1.42231	3.8312	3.7909	1.01063	0.312193	1
LOC108697158	1.55526	3.21637	3.73128	0.862002	0.388687	1
LOC108697162	1.82214	4.86431	4.27386	1.13815	0.255056	1
LOC108697164	1.50849	1.72745	4.37352	0.394978	0.692859	1
LOC108697165	6.5825	1.59813	1.9088	0.837239	0.402458	0.664089
LOC108697168	1.80808	5.08961	4.27	1.19194	0.233283	1
LOC108697170	2.4102	2.30432	3.11348	0.74011	0.459233	1
LOC108697172	233.761	0.0215237	0.157911	0.136302	0.891582	0.957119
LOC108697173	14.8983	0.721222	0.76411	0.943872	0.345235	0.616639
LOC108697174	226.2	-0.25478	0.21575	-1.1809	0.237642	0.513952
LOC108697177	7.4628	4.02058	1.95741	2.05403	0.0399727	0.207582
LOC108697178	4.09278	6.09701	3.97528	1.53373	0.125096	1
LOC108697179	18.1859	1.19488	0.777384	1.53706	0.12428	0.367653
LOC108697180	105.941	-0.927459	0.237794	-3.90027	9.60864e-05	0.00287936
LOC108697181	2.53376	4.86384	4.22786	1.15043	0.249968	1
LOC108697182	1.71375	3.45818	2.66314	1.29854	0.194103	1
LOC108697183	1.72043	1.33467	2.72924	0.489025	0.624824	1
LOC108697186	276.544	-0.416899	0.201114	-2.07294	0.0381775	0.2021
LOC108697189	4.30901	1.93871	2.18109	0.888872	0.374072	1
LOC108697190	6.426	2.54233	1.3972	1.81959	0.068821	0.273208
LOC108697191	15.0637	2.02761	1.58957	1.27558	0.202106	0.471804
LOC108697194	1.73891	3.80682	3.21382	1.18452	0.236209	1
LOC108697195	9.26282	6.44885	2.62305	2.45853	0.0139506	0.114947
LOC108697196	49.3482	0.617053	0.528354	1.16788	0.242856	0.518897
LOC108697197	8.1703	-0.139468	1.25054	-0.111526	0.911199	0.964797
LOC108697198	4.55798	4.63182	2.95977	1.56492	0.117601	1
LOC108697200	2.31602	5.44982	3.59711	1.51506	0.129758	1
LOC108697201	1.48037	3.8442	4.30103	0.893786	0.371436	1
LOC108697203	4.00655	4.7254	2.85475	1.65528	0.0978686	1
LOC108697204	2.70182	1.90072	2.87851	0.660313	0.509053	1
LOC108697205	11.0386	4.26363	2.3849	1.78776	0.0738153	0.283127
LOC108697206	2.82889	2.59959	2.38929	1.08802	0.276587	1
LOC108697207	7.75975	2.39486	1.58613	1.50988	0.131074	0.3772
LOC108697208	13.2326	2.59012	1.09334	2.369	0.0178361	0.13359
LOC108697209	2.04097	4.12142	3.70917	1.11114	0.266507	1
LOC108697211	210.093	-0.0821804	0.232763	-0.353064	0.72404	0.877484
LOC108697212	151.202	-0.00806271	0.256761	-0.0314016	0.974949	0.989895	X
LOC108697213	364.037	0.105971	0.15552	0.681401	0.495618	0.738373
LOC108697214	9.39576	1.27311	1.1568	1.10055	0.271094	0.548252
LOC108697215	10.6768	-1.52547	1.24443	-1.22583	0.220261	0.493362
LOC108697216	26.682	-1.11111	0.650102	-1.70913	0.0874262	0.307675
LOC108697217	264.501	0.0309153	0.180934	0.170865	0.86433	0.945499
LOC108697219	18.1697	2.88392	1.26788	2.27461	0.0229294	0.154123
LOC108697220	7.95002	6.74663	2.96257	2.27729	0.022769	0.153541
LOC108697221	5.57356	1.64453	2.33153	0.705343	0.480597	1
LOC108697222	32.431	0.399	0.484558	0.823432	0.410262	0.671124
LOC108697223	8.72352	0.264516	1.16105	0.227825	0.819782	0.924284
LOC108697224	108.883	0.210185	0.27874	0.754055	0.450816	0.70319
LOC108697226	46.407	0.260413	0.337791	0.770929	0.440749	0.695757
LOC108697227	48.4386	-0.841074	0.381341	-2.20557	0.0274141	0.16931		X
LOC108697228	27.1228	6.22639	2.235	2.78586	0.00533858	0.06313
LOC108697229	105.443	-0.145267	0.234453	-0.619597	0.535523	0.764735
LOC108697231	7.36201	6.40319	2.65443	2.41227	0.0158537	0.124073
LOC108697232	14.0555	7.34224	1.82709	4.01855	5.85578e-05	0.00193098
LOC108697233	30.5219	-0.123438	1.96683	-0.0627599	0.949958	0.980178
LOC108697234	5.76714	3.44018	3.11431	1.10463	0.269318	1
LOC108697235	17.1275	4.14872	1.76969	2.34432	0.0190617	0.13877
LOC108697237	1.92279	3.21648	3.73325	0.861577	0.388921	1
LOC108697238	18.1795	3.20287	1.77731	1.80209	0.0715312	0.278311
LOC108697239	7.81706	6.47144	2.89015	2.23914	0.025147	0.162481
LOC108697240	12.0541	1.31443	1.65731	0.793109	0.427714	0.684971
LOC108697241	4.56038	5.79181	2.40342	2.40982	0.0159603	1
LOC108697242	2.80901	2.07282	3.00626	0.689503	0.490507	1
LOC108697244	263.353	-0.36869	0.216925	-1.69962	0.089202	0.310981		X
LOC108697246	23.7941	4.36144	2.86983	1.51976	0.128573	0.373517
LOC108697247	9.08256	6.75336	4.12791	1.63602	0.101835	0.332339
LOC108697248	5.64716	3.57928	2.18066	1.64137	0.10072	1
LOC108697250	190.493	-0.49312	0.266821	-1.84813	0.064584	0.264743
LOC108697251	4.0276	5.75862	3.49534	1.64751	0.0994523	1
LOC108697252	1.92378	4.57489	3.20622	1.42688	0.153615	1
LOC108697253	4.55503	5.91943	2.69079	2.19989	0.027815	1
LOC108697255	1.957	3.84421	4.30103	0.893789	0.371435	1
LOC108697256	3.63846	5.28266	4.05556	1.30257	0.19272	1
LOC108697257	2.32109	3.87861	3.03499	1.27797	0.201261	1
LOC108697258	1.7085	2.87158	3.86149	0.743645	0.457091	1
LOC108697259	319.75	0.0738316	0.274572	0.268897	0.788009	0.909525
LOC108697260	23.3117	-1.90401	0.677443	-2.81059	0.00494512	0.0599778
LOC108697261	47.6369	0.969927	0.656995	1.47631	0.139861	0.390073
LOC108697262	26.6352	3.32022	1.20145	2.76352	0.00571811	0.0658702
LOC108697263	211.448	-6.94582	1.63417	-4.25036	2.13423e-05	0.000819918
LOC108697264	4.20775	5.26921	3.14137	1.67736	0.0934718	1
LOC108697265	30.9177	0.0460048	0.403081	0.114133	0.909132	0.963853
LOC108697266	68.1329	-1.1294	0.368223	-3.06716	0.00216102	0.0334059
LOC108697267	345.896	-0.182103	0.192843	-0.944309	0.345012	0.616488
LOC108697268	13.4012	2.46191	1.6957	1.45185	0.146542	0.399718
LOC108697271	3.70207	5.98631	3.57119	1.67628	0.0936832	1
LOC108697272	358.438	-0.953267	0.232671	-4.09706	4.18436e-05	0.00144233
LOC108697275	14.1951	1.6666	1.12218	1.48514	0.137506	0.386686
LOC108697277	101.658	0.212032	0.433851	0.488721	0.625039	0.823339
LOC108697279	2.79377	3.87712	2.99322	1.2953	0.195216	1
LOC108697281	48.7414	0.638669	0.51303	1.2449	0.213169	0.484893
LOC108697282	13.0444	0.752333	0.685025	1.09826	0.272093	0.549203		X
LOC108697285	2.75577	3.04086	3.67711	0.82697	0.408254	1
LOC108697286	1.59736	1.71987	3.32471	0.517299	0.604948	1
LOC108697287	237.336	0.183462	0.215849	0.849957	0.395349	0.658353
LOC108697288	5.26754	2.53959	2.1403	1.18655	0.235404	1
LOC108697289	6.90334	1.2643	2.25118	0.561615	0.574378	0.791905
LOC108697290	3.80528	5.64498	2.52318	2.23724	0.0252704	1
LOC108697291	5.29432	6.68475	3.81253	1.75336	0.0795398	1
LOC108697293	139.763	4.75103	0.519041	9.15348	5.51273e-20	2.04726e-17
LOC108697295	11.1389	6.46216	4.03859	1.60011	0.109575	0.34504
LOC108697297	155.51	-0.540208	0.339713	-1.59019	0.111792	0.348353
LOC108697299	10.1693	0.703735	1.09489	0.642742	0.520391	0.754587
LOC108697300	16.3695	-1.03254	0.807141	-1.27926	0.200805	0.470385
LOC108697302	6.94767	2.98729	1.81055	1.64993	0.0989568	0.327317
LOC108697305	32.2778	4.90639	1.58259	3.10024	0.00193367	0.03087
LOC108697306	290.879	-5.4355	0.389567	-13.9527	3.02967e-44	5.55944e-41
LOC108697307	48.2753	-0.459801	0.346104	-1.32851	0.184011	0.448101
LOC108697308	6.89664	1.6197	1.40724	1.15098	0.249742	0.526435
LOC108697309	101.98	0.103366	0.275482	0.37522	0.707497	0.868092
LOC108697311	315.879	-0.16886	0.288476	-0.585352	0.558311	0.779947
LOC108697312	223.954	-1.55742	0.250331	-6.22142	4.92663e-10	5.46926e-08		X
LOC108697317	62.1207	-0.335344	1.30402	-0.257161	0.797054	0.913257
LOC108697318	16.5732	1.06733	1.0422	1.02411	0.305785	0.580618
LOC108697319	8.606	0.382296	1.42954	0.267427	0.78914	0.909694
LOC108697320	14.2141	1.24455	1.30874	0.950957	0.341626	0.613425
LOC108697321	18.7489	0.337486	0.699117	0.482731	0.629287	0.826099
LOC108697324	112.223	-1.13653	0.232801	-4.88198	1.05028e-06	5.78859e-05
LOC108697325	46.4165	-0.0971969	0.803674	-0.120941	0.903738	0.961597
LOC108697326	118.226	-0.502139	0.213726	-2.34945	0.0188009	0.137578
LOC108697329	2.18952	4.76477	3.18053	1.4981	0.134107	1
LOC108697332	79.8343	0.687636	0.422751	1.62658	0.103827	0.335414
LOC108697336	134.726	0.161692	0.284716	0.567907	0.570098	0.788832
LOC108697341	6.51274	2.72714	1.45148	1.87888	0.0602615	0.256461
LOC108697342	2.28202	0.719068	2.22037	0.323851	0.746051	1
LOC108697344	49.0339	0.56505	0.557452	1.01363	0.31076	0.585087
LOC108697345	4.09459	-0.257864	1.40252	-0.183858	0.854125	1
LOC108697348	682.409	-0.330716	0.246637	-1.3409	0.179954	0.443207
LOC108697351	7.19926	1.25757	1.21651	1.03375	0.301252	0.576537
LOC108697352	12.4414	6.65493	1.63705	4.06521	4.79893e-05	0.0016272
LOC108697353	4.55304	0.922488	2.83634	0.325238	0.745001	1
LOC108697358	2.39975	-3.01722	2.09808	-1.43809	0.150409	1
LOC108697359	18.4205	0.303522	0.689761	0.44004	0.659908	0.843026
LOC108697360	2.65083	-1.8313	1.80688	-1.01351	0.310815	1
LOC108697364	97.5712	0.448052	0.229548	1.95189	0.0509512	0.234802
LOC108697367	21.2333	-0.473596	0.576215	-0.821908	0.411129	0.671827
LOC108697369	2.52803	3.21384	3.68139	0.872995	0.382666	1
LOC108697383	2.35794	1.10913	2.88728	0.384145	0.700871	1
LOC108697386	501.396	-0.700538	0.210379	-3.32989	0.000868799	0.0169935
LOC108697387	96.9548	0.0739331	0.302641	0.244293	0.807004	0.917605
LOC108697388	107.744	0.241529	0.347789	0.694471	0.487387	0.732281
LOC108697389	6.16292	1.42903	1.38896	1.02885	0.303548	0.57866
LOC108697393	74.6123	-0.0855487	0.291468	-0.29351	0.769132	0.900637
LOC108697397	52.253	0.864065	0.350914	2.46233	0.0138039	0.11422
LOC108697398	4.92325	1.79221	2.28107	0.785686	0.432051	1
LOC108697399	596.897	-0.145999	0.286097	-0.510314	0.609831	0.814637
LOC108697400	109.035	1.52296	0.236657	6.4353	1.23231e-10	1.50163e-08
LOC108697401	132.022	-0.105623	0.218152	-0.484171	0.628264	0.825586
LOC108697406	102.52	1.03065	0.251749	4.09398	4.24036e-05	0.00146002
LOC108697408	624.068	0.086712	0.266167	0.325781	0.74459	0.888096
LOC108697410	384.883	0.0870183	0.227836	0.381934	0.70251	0.866095
LOC108697411	9.36695	1.78747	1.8031	0.991334	0.321522	0.595281
LOC108697415	2.43267	0.47785	2.11828	0.225584	0.821525	1
LOC108697416	131.308	-0.0662023	0.278218	-0.237951	0.811919	0.920071
LOC108697417	113.015	-0.193171	0.253199	-0.76292	0.445511	0.699256
LOC108697420	529.141	-0.542219	0.269473	-2.01214	0.0442048	0.218226
LOC108697421	4.61183	-1.80682	1.85329	-0.974928	0.329596	1
LOC108697426	17.4467	0.787023	1.26156	0.623849	0.532727	0.762963
LOC108697427	13.7303	6.24369	1.92627	3.24133	0.00118972	0.0214776
LOC108697428	51.6301	1.46782	0.98139	1.49566	0.134742	0.38244
LOC108697429	5.23569	2.49982	1.71959	1.45373	0.146021	1
LOC108697430	57.0093	0.15059	0.382838	0.393353	0.694059	0.86167
LOC108697431	42.1603	-0.310563	0.390858	-0.794567	0.426865	0.684336
LOC108697433	25.0983	4.05263	1.36745	2.96364	0.00304022	0.0427956
LOC108697434	129.847	0.237016	0.211486	1.12072	0.262409	0.538882
LOC108697435	3.33269	4.58507	3.56841	1.28491	0.198825	1
LOC108697436	13.3617	0.477859	1.02972	0.464067	0.6426	0.833199
LOC108697440	4.45875	0.493443	1.61357	0.305808	0.759751	1
LOC108697441	15.3274	1.66656	1.08094	1.54177	0.123129	0.366125
LOC108697442	3.78083	2.91527	2.40416	1.2126	0.225284	1
LOC108697444	1311.66	-0.75643	0.290573	-2.60323	0.0092349	0.0893003
LOC108697447	129.672	0.0232838	0.261524	0.0890311	0.929057	0.972123
LOC108697450	121.353	6.67917	2.98569	2.23706	0.0252822	0.162984
LOC108697453	55.6615	0.308416	0.321897	0.95812	0.338002	0.610254
LOC108697455	4.75847	5.49764	3.52565	1.55933	0.118918	1
LOC108697458	3.38121	4.57275	3.1461	1.45347	0.146095	1
[truncated: 40,999 more rows]

## Sheet: 46_FBvHB
geneSymbol	baseMean	log2FoldChange	lfcSE	stat	pvalue	padj	NPC Enriched	IN Enriched
12S ribosomal RNA	62.5803	-0.943165	0.345433	-2.73039	0.00632598	0.0562452
16S ribosomal RNA	24244.3	-0.321256	0.32658	-0.983697	0.325265	0.721497
1a11.L	9.3369	-0.0165593	1.1671	-0.0141884	0.98868	1
42sp43.L	5.85442	-0.666998	2.21267	-0.301444	0.763076	1
42sp50.L	7.09614	-0.493679	2.00402	-0.246344	0.805416	1		X
ATP6	595.727	-0.968863	0.63476	-1.52635	0.126924	0.450278
ATP8	33.1282	-1.05505	0.727774	-1.44969	0.147145	0.48859
COX1	19387.3	-0.411062	0.306669	-1.34041	0.180112	0.542733
COX2	3453.22	-0.419944	0.395793	-1.06102	0.288681	0.685592
COX3	6220.2	-0.459566	0.461413	-0.995996	0.319252	0.715562
CYTB	50.0152	-0.783852	0.53609	-1.46217	0.143696	0.482461
LOC100036663.S	7.60294	0.432526	1.55858	0.277513	0.781386	1
LOC100036800	4.46724	-0.0153617	3.0413	-0.00505103	0.99597	1
LOC100036800.S	3.55722	-0.676746	3.42807	-0.197413	0.843504	1
LOC100036803	535.519	-0.0382714	0.252987	-0.151278	0.879756	0.979476
LOC100036818	24.0914	1.79809	0.540989	3.32372	0.000888263	0.0113925
LOC100036823	30.334	0.746618	0.59594	1.25284	0.210264	0.589543
LOC100036824	8.78133	-2.31632	1.49883	-1.54541	0.122246	1
LOC100036831	362.051	0.372052	0.159099	2.33849	0.019362	0.129094
LOC100036845	24.9355	0.104879	2.01584	0.0520275	0.958507	0.994173
LOC100036845.L	7.35308	0.709779	2.53882	0.27957	0.779808	1
LOC100036869	71.0833	0.190097	0.332719	0.571345	0.567765	0.889726
LOC100036872	10.0674	-0.8491	1.74498	-0.486597	0.626544	1
LOC100036880	2.57404	-0.706299	3.49795	-0.201918	0.839981	1
LOC100036883	6.72819	0.280366	1.67209	0.167674	0.86684	1
LOC100036895	3.61363	-0.187249	3.91975	-0.0477708	0.961899	1
LOC100036897	6.83053	-0.910067	2.20521	-0.41269	0.679834	1
LOC100036907.L	29.0113	-0.685523	0.658052	-1.04175	0.297529	0.694914
LOC100036910	558.337	-0.700379	0.229301	-3.05441	0.00225505	0.0244285
LOC100036914	1.22285	2.92014	2.77648	1.05174	0.292918	1
LOC100036915	248.673	-0.267558	0.20859	-1.2827	0.199598	0.57262
LOC100036918	5.39275	2.18115	1.55715	1.40074	0.161293	1
LOC100036932	17.6348	-0.504867	1.33819	-0.377275	0.705969	1
LOC100036952	18.3675	-0.570278	1.08535	-0.525431	0.599284	1
LOC100036976	5.95949	-0.568206	1.52814	-0.371828	0.710021	1
LOC100036994	143.952	0.66862	0.305607	2.18784	0.0286813	0.173396
LOC100036997	29.9487	0.577759	0.70147	0.823641	0.410144	0.792293
LOC100037001	288.67	0.197302	0.238383	0.827667	0.407859	0.790497
LOC100037016	18.5007	-0.59214	0.681762	-0.868543	0.385097	1
LOC100037047	4.81445	-0.154579	3.25338	-0.0475133	0.962104	1
LOC100037090	210.029	-0.308367	0.279383	-1.10374	0.269705	0.665761
LOC100037108	225.346	0.450577	0.193974	2.32288	0.0201858	0.133375
LOC100037118	30.2493	0.56313	0.708061	0.795312	0.426432	0.804823
LOC100037145	12.3115	-0.221647	1.31415	-0.168662	0.866063	1
LOC100037177	5.1325	-1.1805	1.57649	-0.748813	0.45397	1
LOC100037180	22.8855	0.241436	1.49971	0.160989	0.872102	0.977703
LOC100037191.L	6.15874	0.194492	2.67843	0.0726143	0.942113	1
LOC100037197	3.57293	-0.0151295	2.49858	-0.00605524	0.995169	1
LOC100037204	5.73976	0.292142	2.26249	0.129124	0.897259	1
LOC100037213	469.958	-0.0746398	0.284802	-0.262076	0.793263	0.962321
LOC100037217	55.1318	0.561906	0.427254	1.31516	0.188457	0.555599
LOC100037226	172.287	-0.243403	0.221982	-1.0965	0.272861	0.669217
LOC100037235	68.1852	-0.363872	0.283786	-1.28221	0.19977	0.572833
LOC100037903.1	4.66556	-1.3101	1.32148	-0.991389	0.321496	1
LOC100049113	8.3164	0.0792949	1.3026	0.0608745	0.951459	1
LOC100049116	294.558	0.109138	0.178109	0.61276	0.540035	0.875725
LOC100049121	216.722	-0.561789	0.223824	-2.50996	0.0120746	0.0915828
LOC100049127	42.7028	-0.101798	0.42324	-0.24052	0.809927	0.965815
LOC100049136	1630.88	-0.111329	0.293431	-0.379405	0.704387	0.937918
LOC100049756	4.22052	0.460908	1.65568	0.278379	0.780721	1
LOC100101274	4.50384	0.240822	3.08725	0.0780055	0.937824	1
LOC100101277	188.635	0.312289	0.216532	1.44223	0.149237	0.491255
LOC100101278	1.5564	0.873161	2.61809	0.333511	0.738748	1
LOC100101281	45.1442	-0.276765	0.382153	-0.724227	0.468927	0.833937
LOC100101282	11.2863	0.00755872	1.62593	0.00464887	0.996291	1
LOC100101283	58.3135	0.322474	0.324594	0.993469	0.320481	0.71633		X
LOC100101333	60.7444	-0.290527	0.466799	-0.622383	0.53369	0.872291
LOC100125664	13.5415	0.421424	1.69305	0.248915	0.803427	1
LOC100125668	276.129	-0.0853312	0.208206	-0.40984	0.681923	0.931558
LOC100126603	30.1513	0.122589	0.567839	0.215887	0.829076	0.969082
LOC100126627	1.82925	0.62353	2.9648	0.210311	0.833425	1
LOC100126638	34.9776	-0.136315	0.442926	-0.307761	0.758264	0.953008
LOC100126648	99.2574	0.103157	0.39975	0.258055	0.796365	0.962997
LOC100126651	20.2893	0.269718	1.21652	0.221714	0.824537	0.968934
LOC100126657	5.77249	0.0858456	2.45996	0.0348971	0.972162	1
LOC100126660	109.34	-2.51258	0.34268	-7.33215	2.26488e-13	1.94712e-11
LOC100127249	9.05274	1.12775	2.03011	0.55551	0.578546	1
LOC100127254	5.00883	-0.834081	2.41512	-0.345357	0.729826	1
LOC100127277	128.52	0.642362	0.891232	0.720757	0.471059	0.835441
LOC100127280	94.7895	0.0591302	1.60833	0.036765	NA	1
LOC100127286	24.526	0.1563	0.594354	0.262974	0.79257	0.962321
LOC100127287	16.1613	0.297284	1.56601	0.189835	0.849438	1
LOC100127296	95.1775	0.178961	0.254544	0.703063	0.482016	0.843097
LOC100127300	75.6197	0.208714	0.296208	0.704619	0.481047	0.842312
LOC100127316	45.3784	0.175336	0.483147	0.362903	0.716677	0.940941
LOC100127323	89.626	0.356156	0.35164	1.01284	0.311135	0.707612
LOC100127329	1311.98	0.182227	0.24463	0.744908	0.456327	0.825158
LOC100127334	2.85012	0.486694	2.61816	0.185892	0.85253	1
LOC100127337	4.95671	0.242409	2.31455	0.104733	0.916588	1
LOC100127794.L	21.5508	0.331102	1.10414	0.299874	0.764273	0.955858
LOC100135120.L	86.2139	0.326064	0.348923	0.934489	0.350052	0.744572
LOC100135146.L	15.8946	-2.00714	0.91655	-2.18988	0.0285327	1
LOC100135146.S	8.84679	-0.229952	1.57068	-0.146403	0.883603	1
LOC100135389.L	6.4318	-0.758909	2.77325	-0.273653	0.784351	1
LOC100137612	70.1724	0.418291	0.251056	1.66612	0.0956887	0.381354
LOC100137619	4.31931	-3.04148	2.49373	-1.21965	0.222597	1
LOC100137633	2.83587	-0.330829	2.81775	-0.117409	0.906536	1
LOC100137634	176.97	0.0026743	0.197758	0.0135231	0.98921	0.998335		X
LOC100137643	4.03486	-0.15802	2.47078	-0.0639556	0.949006	1
LOC100137665	14.6927	0.740904	1.59283	0.46515	0.641824	1
LOC100137672	21.9814	0.225144	0.673373	0.334353	0.738114	0.946103
LOC100137672.S	32.9537	-1.0112	0.514739	-1.9645	0.049472	0.250409
LOC100137678	10.1954	0.298907	2.37439	0.125888	0.899821	1
LOC100137691	272.505	-1.76808	0.344748	-5.12861	2.91895e-07	9.54836e-06
LOC100137715	2.69968	-0.340047	3.1455	-0.108106	0.913912	1
LOC100144987.S	2.33056	1.11325	2.31151	0.481611	0.630082	1
LOC100145345.L	11.9627	0.910012	1.39589	0.651921	0.514452	1
LOC100145450.S	105.956	-0.294954	0.254992	-1.15672	0.247386	0.638297
LOC100145473.S	4.63953	0.583013	2.95859	0.197058	0.843782	1
LOC100145531.L	21.9492	-0.640274	0.718073	-0.891656	0.372577	0.763108
LOC100145533.L	72.3787	-0.438828	1.33741	-0.328118	0.742823	0.947842
LOC100145817.L	2.5179	-0.630813	3.06777	-0.205626	0.837083	1
LOC100158280	8.87616	0.559	1.55631	0.359182	0.719459	1
LOC100158299	225.732	0.171841	0.18593	0.924221	0.355371	0.748998
LOC100158305.L	12.4137	0.33538	1.49458	0.224397	0.822448	1
LOC100158309	6.22552	0.654735	2.99743	0.218432	0.827092	1
LOC100158314	5.77096	0.464588	2.30701	0.201381	0.8404	1
LOC100158321	73.7551	-0.251092	0.282713	-0.888151	0.374459	0.764975
LOC100158331	35.3485	0.53274	0.500356	1.06472	0.287001	0.683874
LOC100158340	801.69	-0.417867	0.215772	-1.93662	0.0527924	0.261537
LOC100158347	166.973	-0.371392	0.247994	-1.49759	0.134241	0.463686
LOC100158361	184.449	-0.434956	0.273823	-1.58846	0.112183	0.419051
LOC100158366	46.4092	-1.13763	0.807332	-1.40912	0.1588	0.508763
LOC100158370	111.934	0.217381	0.240017	0.905688	0.365101	0.757565
LOC100158382	120.602	0.0233448	0.27015	0.0864143	0.931137	0.989629
LOC100158389	7.08359	-0.361306	2.07552	-0.17408	0.861803	1
LOC100158394	185.264	-0.0533754	0.203827	-0.261866	0.793425	0.962321
LOC100158410.L	111.037	-0.308413	0.331864	-0.929337	0.352714	0.747418
LOC100158433.L	55.5545	0.641704	0.391808	1.6378	0.101463	0.395397
LOC100158544.S	7.83478	-0.49716	4.09723	-0.121341	0.903421	1
LOC100170619.S	5.90196	-0.0668131	1.68855	-0.0395683	0.968437	1
LOC100174801	8.8985	0.481301	1.66008	0.289926	0.771873	1
LOC100174804	292.099	0.134053	0.213823	0.626936	0.530701	0.870656
LOC100174808	11.7109	-0.211873	3.53502	-0.0599354	0.952207	1
LOC100189560	71.4898	0.295406	0.310202	0.952299	0.340945	0.735541
LOC100189574	77.872	0.659609	0.399449	1.6513	0.0986779	0.389265
LOC100191024	34.6537	-0.674721	1.04414	-0.646201	0.518149	0.863525
LOC100191026	194.598	-0.0752676	0.231958	-0.324488	0.745569	0.948927
LOC100192369	9.62461	-0.286145	1.11173	-0.257388	0.79688	1
LOC100217319	51.3287	-0.151926	0.342866	-0.443105	0.65769	0.922557
LOC100301958	52.0187	-0.788535	0.331307	-2.38007	0.0173093	0.118832
LOC100335021	11.7079	0.0421082	1.68258	0.025026	0.980034	1
LOC100335115	1915.15	-0.454985	0.55324	-0.822401	0.410849	0.792904
LOC100337617	12.401	0.756676	1.2776	0.592261	0.553676	1
LOC100379118	9.06882	-2.07515	1.22146	-1.69891	0.0893358	1
LOC100462904	951.88	0.538744	0.274966	1.95931	0.0500766	0.252473
LOC100462905	451.656	-2.69676	0.219444	-12.2891	1.03713e-34	5.5156e-32
LOC100485017.S	2.90261	-0.0153231	3.19133	-0.00480148	0.996169	1
LOC100485044.L	5.5335	-0.484299	1.51435	-0.319808	0.749114	1
LOC100485105.S	14.1614	-0.0334746	3.21105	-0.0104248	0.991682	1
LOC100485132.L	7.15864	-0.782588	2.83921	-0.275636	0.782828	1
LOC100485199-like.S	11.9228	0.872027	0.858686	1.01554	0.309851	1
LOC100485290.L	30.7999	-0.392357	0.422142	-0.929443	0.35266	0.747418
LOC100485292.L	7.25016	-0.474361	2.17021	-0.218579	0.826978	1
LOC100485439.L	2.03311	3.52772	3.13376	1.12572	0.260286	1
LOC100485470.1.L	10.7362	-0.00110982	1.20848	-0.000918362	0.999267	1
LOC100485504.L	1.51917	-0.0150177	3.11945	-0.00481422	0.996159	1
LOC100485669.L	12.6163	0.153482	1.26229	0.12159	0.903224	1
LOC100485723.L	2.00147	3.62324	2.62426	1.38067	0.16738	1
LOC100485767-like.S	1.63549	-0.295485	2.36078	-0.125164	0.900394	1
LOC100485776.L	8.93233	-0.590224	3.85442	-0.153129	0.878296	1
LOC100485784-like.S	2.86807	-0.435829	4.03223	-0.108086	0.913927	1
LOC100485829.S	4.468	-0.647456	1.96689	-0.329178	0.742021	1
LOC100485975.L	2.74181	-0.0151908	2.98756	-0.00508467	0.995943	1
LOC100486031.S	3.03006	0.391523	2.9093	0.134577	0.892947	1
LOC100486034.L	1.12773	4.21251	2.87523	1.46511	0.142892	1
LOC100486127.S	33.9537	-0.735917	0.637997	-1.15348	0.248714	0.640026
LOC100486133.S	37.0738	1.25672	0.581325	2.16181	0.0306325	0.181525
LOC100486289.L	10.5271	-0.0467705	1.82441	-0.025636	0.979548	1
LOC100486352-like.L	3.9439	1.72101	3.18558	0.54025	0.589025	1
LOC100486352-like.S	7.27029	0.0515791	2.57072	0.0200641	0.983992	1
LOC100486380.L	6.48486	0.909081	1.96593	0.462418	0.643782	1
LOC100486434-like.L	3.94819	-1.05817	2.24331	-0.4717	0.637141	1
LOC100486572.L	4.08181	-1.36481	3.3813	-0.403634	0.686482	1
LOC100486657.L	1.94519	-2.24242	2.8687	-0.781684	0.4344	1
LOC100486734-like.L	8.96526	0.369919	0.980172	0.377402	0.705875	1
LOC100486734-like.S	10.7152	-0.369659	1.84963	-0.199856	0.841593	1
LOC100486853.L	2.6885	0.251862	4.0771	0.0617747	0.950742	1
LOC100486894.S	3.13632	-1.07139	2.0874	-0.513264	0.607767	1
LOC100486959.1	1.58617	0.742953	3.6346	0.204411	0.838032	1
LOC100486966.L	18.7266	-0.408594	1.20498	-0.339088	0.734543	1
LOC100487224.L	46.066	-1.13419	0.477062	-2.37745	0.0174328	0.119429
LOC100487262.S	63.5538	0.530203	0.454389	1.16685	0.243272	0.632678
LOC100487264.1	3.29504	-0.435974	3.97556	-0.109664	0.912676	1
LOC100487306.S	2.50312	-1.37459	4.10422	-0.334922	0.737684	1
LOC100487408.L	6.74805	0.309149	3.13587	0.0985846	0.921468	1
LOC100487412.L	9.89607	-0.431183	2.1695	-0.198747	0.84246	1
LOC100487423.L	5.45231	0.318483	2.86951	0.110989	0.911625	1
LOC100487482.S	2.69852	-0.386707	2.624	-0.147373	0.882838	1
LOC100487499.S	209.472	-0.132121	0.220044	-0.60043	0.54822	0.87952
LOC100487648.1.L	4.27361	-1.81311	2.3774	-0.762646	0.445675	1
LOC100487668.L	9.75167	0.757366	0.860441	0.880207	0.378747	1
LOC100487732	1.31082	-3.8936	4.27916	-0.909898	0.362876	1
LOC100487740.S	3.39372	2.48361	2.50248	0.992461	0.320973	1
LOC100487885.L	1.3659	-1.3851	3.62552	-0.38204	0.702431	1
LOC100487918.L	4.06479	0.0863581	2.53469	0.0340705	0.972821	1
LOC100488087.L	18.9991	0.758395	0.629268	1.2052	0.228125	1
LOC100488137.L	3.52792	-0.53725	3.51365	-0.152904	0.878474	1
LOC100488166.L	2.12832	1.0002	4.10136	0.24387	0.807332	1
LOC100488177.S	9.60662	0.825872	1.93067	0.427765	0.668822	1
LOC100488227.L	5.97738	-0.924608	2.14808	-0.430435	0.666879	1
LOC100488328.L	1.40825	2.50973	3.68626	0.680835	0.495976	1
LOC100488333.L	20.0876	-0.663291	0.844502	-0.785423	0.432206	0.809307
LOC100488348.S	6.58663	-0.847231	1.26369	-0.67044	0.502578	1
LOC100488377.S	3.83553	-1.44506	2.7489	-0.525686	0.599106	1
LOC100488442.S	17.0079	2.99465	1.05183	2.84708	0.00441225	1
LOC100488486.L	4.93219	-0.280018	2.3107	-0.121183	0.903546	1
LOC100488567.L	104.745	-0.45911	0.295549	-1.55342	0.120323	0.436884
LOC100488577.L	10.4752	-0.0237926	2.44445	-0.00973333	0.992234	1
LOC100488626.L	27.8339	-2.33162	0.604209	-3.85896	0.00011387	0.00195346
LOC100488642.L	2.47911	-1.10672	3.54061	-0.312578	0.754601	1
LOC100488689.S	87.8661	0.238479	0.321826	0.74102	0.458681	0.826404
LOC100488695.S	2.77374	-0.673971	4.11936	-0.16361	0.870038	1
LOC100488697.L	6.08107	-0.102244	1.44767	-0.0706263	0.943695	1
LOC100488701.S	6.05799	-1.46696	2.44411	-0.600202	0.548371	1
LOC100488805.L	7.54751	-0.251472	3.46109	-0.0726568	0.942079	1
LOC100488828.L	6.78082	-0.529494	2.52298	-0.209868	0.83377	1
LOC100488885-like.L	226.893	-0.0588825	0.200826	-0.293202	0.769368	0.956971
LOC100488906.L	3.29302	0.581478	3.14025	0.185169	0.853096	1
LOC100489069.S	7.24884	0.0354936	2.42854	0.0146152	0.988339	1
LOC100489074.L	5.63929	-0.163617	3.23567	-0.0505666	0.959671	1
LOC100489118.L	2.57265	-0.70297	4.07152	-0.172655	0.862922	1
LOC100489122.L	13.2253	-0.582097	1.13062	-0.514849	0.606658	1
LOC100489157-like.S	1.86277	-1.03682	2.85626	-0.362997	0.716607	1
LOC100489188.L	5.37063	0.880994	1.52254	0.578635	0.562836	1
LOC100489282.L	1.9537	0.312661	4.15548	0.0752406	0.940023	1
LOC100489282.S	4.56043	-0.659526	2.73865	-0.240822	0.809693	1
LOC100489286-like.L	2.93717	0.176796	2.92937	0.0603529	0.951875	1
LOC100489326.S	9.13074	-0.974014	1.13751	-0.856265	0.391851	1
LOC100489554.L	5.11192	0.611459	1.96653	0.310933	0.755852	1
LOC100489764.L	10.6827	0.748961	1.50481	0.49771	0.618688	1
LOC100489771.S	54.196	-0.192368	0.384456	-0.500364	0.616819	0.909792
LOC100489773-like.S	12.1365	0.296935	0.812287	0.365555	0.714697	1
LOC100489832.L	1.43565	-0.0203197	3.0365	-0.00669181	0.994661	1
LOC100489882.L	5.24709	0.111254	3.70112	0.0300596	0.97602	1
LOC100489972.L	2.5743	-1.20294	4.06602	-0.295852	0.767343	1
LOC100490013.L	2.7117	0.590606	2.37398	0.248783	0.803529	1
LOC100490018.L	11.2558	-0.0767327	2.15005	-0.0356888	0.971531	1
LOC100490286.S	1.45626	0.312734	4.12477	0.0758186	0.939563	1
LOC100490389-like.L	5.11968	-1.64637	2.46375	-0.668235	0.503983	1
LOC100490462.L	5.21275	-0.12894	2.47442	-0.0521093	0.958442	1
LOC100490530.L	48.9486	-0.899163	0.299473	-3.00249	0.00267785	0.0280518
LOC100490553.S	7.39841	-0.372417	2.51078	-0.148327	0.882085	1
LOC100490559.S	21.8932	-0.422869	0.681971	-0.620069	0.535212	0.873482
LOC100490682.1.L	8.93724	0.85306	2.11757	0.402848	0.68706	1
LOC100490725.S	2.25606	0.58745	3.14553	0.186757	0.851851	1
LOC100490741.L	27.1857	-0.515708	0.701251	-0.735412	0.462089	0.828983
LOC100490786.L	3.57601	0.130264	2.59312	0.0502347	0.959935	1
LOC100490894.S	3.16183	0.179578	3.9898	0.0450094	0.9641	1
LOC100490918.L	7.30465	0.356296	2.06239	0.172759	0.862841	1
LOC100490937.L	1.45447	0.0906868	2.46792	0.0367462	0.970687	1
LOC100490989.L	5.43779	1.19249	3.32702	0.358425	0.720025	1
LOC100491090.L	2.26466	-0.594956	3.09883	-0.191994	0.847747	1
LOC100491107.L	1.72245	1.47407	3.89051	0.378888	0.704771	1
LOC100491114.S	3.4949	0.676496	3.38598	0.199793	0.841642	1
LOC100491211.L	15.1033	0.549259	1.8524	0.296512	0.766839	1
LOC100491220.L	1.51596	-0.0153454	4.16386	-0.00368537	0.99706	1
LOC100491357.S	6.6694	0.0851106	3.16538	0.026888	0.978549	1
LOC100491389.L	5.91316	1.08983	2.80098	0.389089	0.69721	1
LOC100491404.S	2.21342	-0.943715	3.53688	-0.266821	0.789607	1
LOC100491437-like.L	16.3937	-0.0670463	1.50048	-0.0446832	0.96436	1
LOC100491437-like.S	4.08562	1.39116	3.04197	0.457322	0.64744	1
LOC100491450.S	13.5292	-0.044546	1.23272	-0.0361362	0.971174	1
LOC100491454.L	3.9427	-0.143105	2.04969	-0.069818	0.944339	1
LOC100491454.S	2.9181	0.406486	3.58346	0.113434	0.909687	1
LOC100491587.L	6.18931	0.922254	2.92307	0.315508	0.752376	1
LOC100491587.S	4.97618	-0.101437	2.82866	-0.0358603	0.971394	1
LOC100491616-like.L	14.496	-0.267104	1.10086	-0.242632	0.808291	1
LOC100491629.S	7.3302	0.0486587	2.17678	0.0223535	0.982166	1
LOC100491824.S	5.79235	0.998854	3.03913	0.328664	0.74241	1
LOC100491907.S	3.11118	0.108024	1.64296	0.0657495	0.947577	1
LOC100491930.L	3.66307	0.155117	2.04153	0.0759807	0.939434	1
LOC100491939.S	113.763	0.444106	0.333158	1.33302	0.182526	0.546509
LOC100491961.S	2.13102	2.24187	3.51185	0.638374	0.52323	1
LOC100491966.1.L	7.79389	-0.468229	2.67915	-0.174767	0.861262	1
LOC100492080.1	1.98524	0.416978	3.20583	0.130069	0.896512	1
LOC100492152.L	1.52262	-0.623865	3.83636	-0.162619	0.870818	1
LOC100492197-like.L	200.127	-0.231911	0.239112	-0.969886	0.332104	0.728703
LOC100492376.L	1.69552	-0.835847	4.14599	-0.201604	0.840227	1
LOC100492420.S	15.612	0.123248	1.28794	0.0956939	0.923764	1
LOC100492487.S	60.7597	0.461986	0.319394	1.44645	0.148052	0.489775
LOC100492546-like.S	3.90746	-0.223786	1.96235	-0.11404	0.909206	1
LOC100492639-like.S	7.10719	0.984577	1.53245	0.642486	0.520558	1
LOC100492643.L	1.65413	2.19718	2.2931	0.958171	0.337977	1
LOC100492708	27.9103	0.00348673	0.646795	0.00539078	0.995699	0.999363
LOC100492859.S	4.47331	-0.580015	1.78709	-0.324558	0.745515	1
LOC100492885.L	81.2207	-0.044887	0.558565	-0.0803612	0.93595	0.991088
LOC100492888-like.L	20.7953	0.0105567	0.911736	0.0115787	0.990762	0.998555
LOC100492899.L	3.29309	0.674275	2.28188	0.295491	0.767619	1
LOC100492951-like.S	135.137	-1.51827	0.281347	-5.39644	6.79762e-08	2.49981e-06
LOC100492960.S	1.75002	1.23822	3.58775	0.345124	0.730001	1
LOC100493020.L	2.6004	-0.0119106	2.77495	-0.00429217	0.996575	1
LOC100493071.L	44.6537	0.423726	3.26451	0.129798	0.896726	0.982427
LOC100493076.L	4.07194	-0.77428	2.51925	-0.307345	0.758581	1
LOC100493184.L	17.4577	0.657435	1.65094	0.398218	0.690469	1
LOC100493194.L	10.8198	0.0637963	2.22139	0.0287191	0.977089	1
LOC100493237.L	1.98126	-0.983484	2.51392	-0.391215	0.695639	1
LOC100493256-like.L	4.91748	-0.986013	2.38591	-0.413265	0.679412	1
LOC100493256-like.S	2.479	-0.840388	3.56455	-0.235762	0.813617	1
LOC100493283-like.L	37.3803	0.0352384	0.647201	0.0544474	0.956579	0.993332
LOC100493356.L	11.2001	0.160977	2.22655	0.0722987	0.942364	1
LOC100493356.S	6.35194	0.528524	2.12977	0.24816	0.80401	1
LOC100493381.L	7.14526	1.05894	3.11823	0.339596	0.73416	1
LOC100493382.L	60.5282	-1.23677	0.55997	-2.20864	0.0271995	0.167249
LOC100493422.S	2.98434	-2.19988	3.09736	-0.710243	0.477553	1
LOC100493447.L	2.04298	-1.04992	3.1759	-0.330592	0.740953	1
LOC100493447.S	1.83394	0.314169	3.73704	0.0840689	0.933002	1
LOC100493463.L	3.66254	0.874619	3.20561	0.27284	0.784976	1
LOC100493498.L	1.96908	-1.65825	3.24014	-0.511785	0.608802	1
LOC100493512.1	4.15979	1.23468	2.52619	0.488751	0.625018	1
LOC100493549.L	5.33207	-0.209923	3.18752	-0.0658579	0.947491	1
LOC100493618.L	4.45362	-0.015367	3.11927	-0.00492646	0.996069	1
LOC100493672.L	3.9166	0.819765	2.8586	0.286771	0.774288	1
LOC100493742.1	12.4744	0.448419	2.23916	0.200262	0.841276	1
LOC100493745.L	206.755	0.104924	0.198021	0.529862	0.596208	0.902083
LOC100493773.L	1.96941	-1.26085	4.16009	-0.303083	0.761826	1
LOC100493778.L	2.66203	1.83725	4.0775	0.450583	0.65229	1
LOC100493912.S	22.4095	-0.150332	0.963373	-0.156047	0.875996	0.978621
LOC100493955.L	7.00276	-1.46872	2.54086	-0.578043	0.563235	1
LOC100493956.S	5.46971	0.178588	3.64002	0.0490623	0.96087	1
LOC100493968.1.L	9.39478	-0.310395	0.918292	-0.338013	0.735353	1
LOC100494033.L	25.1979	-0.473283	2.19448	-0.21567	0.829245	0.969082
LOC100494136.L	10.9009	0.175344	2.07967	0.0843132	0.932807	1
LOC100494386.L	10.268	0.779795	0.834323	0.934645	0.349971	1
LOC100494454.S	4.21003	-0.0555187	2.8912	-0.0192026	0.984679	1
LOC100494476.L	31.5122	-0.386203	0.627862	-0.615108	0.538483	0.874918
LOC100494536.S	4.96096	0.197379	2.33688	0.0844628	0.932689	1
LOC100494571.S	3.39589	0.872478	3.44656	0.253144	0.800157	1
LOC100494592.L	1.05434	-3.11691	3.50174	-0.890105	0.37341	1
LOC100494604.L	9.23025	0.98893	4.09824	0.241306	0.809318	1
LOC100494615.S	1.50519	-0.440393	4.17789	-0.10541	0.91605	1
LOC100494832.S	1.52377	0.325285	3.61516	0.0899782	0.928305	1
LOC100494870.L	2.86725	1.60633	3.09229	0.519464	0.603437	1
LOC100494943.L	4.90274	0.228284	3.30055	0.0691654	0.944858	1
LOC100494970.S	2.06115	-0.0153587	3.55498	-0.00432032	0.996553	1
LOC100495010.S	84.2058	-0.245166	0.33014	-0.742613	0.457716	0.825805
LOC100495012.L	3.60493	-1.30107	3.08821	-0.421303	0.673534	1
LOC100495012.S	7.74418	0.139385	2.486	0.0560678	0.955288	1
LOC100495079.L	4.12	0.451512	2.52042	0.179142	0.857826	1
LOC100495096.1	3.36839	0.648012	1.37713	0.470553	0.63796	1
LOC100495101.S	3.12757	1.25285	3.00591	0.416793	0.67683	1
LOC100495179.L	10.3056	0.896704	1.57935	0.567769	0.570192	1
LOC100495179.S	2.35048	-1.03667	3.50809	-0.295508	0.767606	1
LOC100495222.1.L	10.0548	0.217995	1.91954	0.113566	0.909582	1
LOC100495284.L	1.35267	3.10439	3.71545	0.835535	0.403417	1
LOC100495333.S	3.57185	-0.384794	3.11088	-0.123693	0.901558	1
LOC100495347.1	2.76673	0.152105	2.70893	0.0561494	0.955223	1
LOC100495360.L	2.9631	-0.383458	3.48093	-0.11016	0.912283	1
LOC100495379.L	4.18712	-0.0498359	1.92985	-0.0258236	0.979398	1
LOC100495541.1.L	2.21588	-0.241765	3.5342	-0.0684074	0.945461	1
LOC100495655-like.S	3.98023	0.0209878	2.91238	0.00720641	0.99425	1
LOC100495801-like.L	2.56993	0.443072	2.75931	0.160574	0.872429	1
LOC100495841.L	2.3785	1.92429	3.17855	0.605397	0.544915	1
LOC100495874.L	6.15202	0.0727862	3.17815	0.0229021	0.981728	1
LOC100495886.1.S	5.73021	-1.87671	3.12418	-0.600704	0.548037	1
LOC100495895.S	47.212	-0.235333	0.336343	-0.699682	0.484126	0.843761
LOC100495966	1.62233	0.375859	2.74857	0.136747	0.891231	1
LOC100496010.S	14.4818	0.155867	0.909149	0.171442	0.863876	1
LOC100496035.L	1.35349	-1.05501	3.62999	-0.290637	0.771329	1
LOC100496074-like.L	4.09518	2.27346	1.41903	1.60212	0.109129	1
LOC100496137-like.L	25.3416	-0.672464	0.743581	-0.904359	0.365805	0.75827
LOC100496293.L	11.9659	-0.388435	2.2781	-0.170508	0.864611	1
LOC100496329.L	1.26472	-2.12262	3.82438	-0.555022	0.57888	1
LOC100496329.S	7.20017	-0.187614	1.8846	-0.0995508	0.920701	1
LOC100496462.L	10.9452	-0.983791	0.837714	-1.17438	0.240244	1
LOC100496618.L	8.09017	-0.933506	2.39836	-0.389227	0.697108	1
LOC100496658.L	17.1055	-0.309701	1.04536	-0.296262	0.76703	1
LOC100496716.L	27.4167	-0.0739617	0.648246	-0.114095	0.909162	0.985803
LOC100496797-like.L	93.2026	-1.24137	0.326459	-3.80252	0.000143233	0.00239562
LOC100496797.L	321.136	-0.82105	0.20285	-4.04757	5.1752e-05	0.000988692
LOC100496837.S	9.16408	1.28258	1.46106	0.877843	0.380029	1
LOC100496844.L	8.95411	-0.204389	1.74279	-0.117277	0.906641	1
LOC100496853.L	1.81137	0.312657	4.15548	0.0752397	0.940024	1
LOC100496870.L	5.98763	0.808514	1.99624	0.405018	0.685464	1
LOC100496873.L	8.77536	-0.368525	1.59779	-0.230647	0.817589	1
LOC100496891.S	4.22778	0.199854	2.19662	0.0909827	0.927506	1
LOC100496975.L	3.89892	0.775639	3.05803	0.25364	0.799773	1
LOC100496975.S	38.083	0.748262	0.541331	1.38226	0.166891	0.521279
LOC100497020.L	11.3718	-0.970014	0.984737	-0.985048	0.3246	1
LOC100497066.L	10.8626	0.0335182	4.0917	0.00819174	0.993464	1
LOC100497184.L	198.647	-0.0376402	0.217849	-0.172781	0.862823	0.97585
LOC100497185.L	1.41483	2.77315	2.64592	1.04808	0.2946	1
LOC100497185.S	1.8697	1.06194	2.73076	0.388881	0.697364	1
LOC100497299.1.L	1.58287	3.33492	3.63655	0.917056	0.359113	1
LOC100497309.L	17.0592	1.87191	1.37755	1.35886	0.17419	1
LOC100497429.S	2.72739	-0.874821	4.0413	-0.21647	0.828621	1
LOC100497432.L	1.78886	-0.0247602	3.56117	-0.00695282	0.994452	1
LOC100497489.S	9.38668	0.845243	1.10425	0.765443	0.444008	1
LOC100497500.S	13.0708	-0.0559641	1.35622	-0.0412649	0.967085	1
LOC100497501.L	3.23865	1.26017	2.57707	0.488994	0.624846	1
LOC100497556.L	15.7763	0.725143	0.978496	0.741079	0.458646	1
LOC100497626.L	1.5754	0.41294	3.65361	0.113022	0.910013	1
LOC100497703.S	10.5895	1.87897	1.75436	1.07103	0.284155	1
LOC100497709.L	8.66346	-0.595949	1.77282	-0.336159	0.736751	1
LOC100497740.L	1.51447	0.340967	2.33885	0.145784	0.884092	1
LOC100497794.S	1.97358	1.42536	4.12659	0.345409	0.729787	1
LOC100497848.L	3.13719	0.322656	1.87361	0.172211	0.863272	1
LOC100497909.S	101.801	0.0777463	0.883959	0.0879524	0.929915	0.989575
LOC100497953.L	14.5754	-0.183951	1.26071	-0.14591	0.883993	1
LOC100498166.L	1.67776	4.348	3.02568	1.43703	0.150709	1
LOC100498173.S	4.63241	0.710327	3.023	0.234974	0.814229	1
LOC100498184.L	3.00782	1.72456	2.99191	0.576407	0.56434	1
LOC100498204.L	2.54618	0.251817	4.09809	0.0614474	0.951003	1
LOC100498247.S	1.396	-0.361063	3.29855	-0.109461	0.912837	1
LOC100498327.L	21.1876	-0.265272	0.920797	-0.28809	0.773278	0.957771
LOC100498441.1.L	3.18876	-0.248192	2.95019	-0.0841274	0.932955	1
LOC100498450.S	1.84423	-1.35835	2.04637	-0.663784	0.506829	1
LOC100498474.S	6.6878	-0.385828	2.08876	-0.184717	0.853451	1
LOC100498477.L	3.86622	1.23949	2.14912	0.576745	0.564112	1
LOC100498517.L	20.0319	-0.383614	0.613644	-0.62514	0.531879	0.871444
LOC100498590.S	2.9169	0.274727	3.14857	0.0872544	0.930469	1
LOC100498594.S	2.2365	3.52667	3.0258	1.16553	0.243803	1
LOC100505442	125.736	0.508894	0.249419	2.04032	0.0413184	0.221644
LOC100505446	258.977	0.120884	0.24373	0.495974	0.619913	0.910911
LOC100653495	116.14	0.108439	0.241429	0.449157	0.653319	0.921683
LOC100653497	62.1841	-0.925945	0.411036	-2.25271	0.0242775	0.152984
LOC100653500	11.8604	0.953389	0.97458	0.978256	0.327948	1
LOC100653501	8.30774	-0.372773	1.85431	-0.20103	0.840675	1
LOC100653508	152.934	-0.316902	0.283625	-1.11733	0.263854	0.659722
LOC100653509	532.408	-0.0319636	0.246512	-0.129663	0.896833	0.982427
LOC101027262	5.45188	-0.0616366	2.90245	-0.021236	0.983057	1
LOC101027264	21.5028	0.841212	0.608886	1.38156	0.167107	0.521693
LOC101027269	27.9249	0.376019	0.489781	0.76773	0.442648	0.817063
LOC101027274	6.82156	0.146383	3.09253	0.0473345	0.962247	1
LOC101027275	1.65993	-0.768413	4.16956	-0.184291	0.853785	1
LOC101027277	604.326	-0.581346	0.225162	-2.5819	0.00982582	0.0783735
LOC101027278	706.319	-0.611572	0.192087	-3.18382	0.00145344	0.0169838
LOC101027283	2.28053	-2.38744	4.09131	-0.583538	0.559531	1
LOC101027285	596.982	-0.0221691	0.232513	-0.0953457	0.92404	0.988955
LOC101027288	335.63	0.534441	0.20829	2.56585	0.0102923	0.081048
LOC101027289	22.2364	-1.02312	4.0871	-0.25033	0.802332	0.963862
LOC101027292	42.1398	0.11249	0.59228	0.189927	0.849366	0.973375
LOC101027296	0.894407	-1.50588	2.72832	-0.551945	0.580986	1
LOC101027307	9.12883	-0.13219	1.88192	-0.0702419	0.944001	1
LOC101027309	218.079	-1.05497	0.234825	-4.4926	7.03599e-06	0.000169725
LOC101243550	95.9987	0.0256197	0.342785	0.0747397	0.940422	0.992114
LOC101243553	24.411	0.247133	0.879212	0.281085	0.778645	0.959195
LOC101243554	27.6667	0.123222	0.911732	0.135152	0.892492	0.981934
LOC101730276.L	11.5147	2.39129	1.17243	2.03961	0.0413889	1
LOC101730283.S	2.38979	1.23061	4.12052	0.298655	0.765204	1
LOC101730314.L	123.134	0.476404	0.271962	1.75173	0.0798209	0.339788
LOC101730464.L	19.4541	0.541679	2.69159	0.201249	NA	1
LOC101730467.L	1.6384	-2.88486	4.25372	-0.678197	0.497647	1
LOC101730503.L	1.48877	-0.465311	2.57195	-0.180918	0.856432	1
LOC101730584	1.89409	-0.627833	3.54664	-0.177022	0.859491	1
LOC101730652.S	6.13658	-0.831092	1.50438	-0.552447	0.580642	1
LOC101730692.L	9.7257	0.861423	1.37477	0.626594	0.530926	1
LOC101730710.L	2.40124	0.0402782	2.50338	0.0160895	0.987163	1
LOC101730711.S	23.8604	0.376415	0.496176	0.758632	0.448073	0.820821
LOC101730741.L	4.98688	0.823295	2.09399	0.39317	0.694194	1
LOC101730756.S	2.76602	2.23501	3.04941	0.732933	0.463599	1
LOC101730771-like.L	11.3012	0.307835	2.19194	0.14044	0.888313	1
LOC101730771-like.S	3.42072	0.450142	3.42	0.131621	0.895284	1
LOC101730807.L	9.13302	0.385032	2.0366	0.189056	0.850049	1
LOC101730829.L	2.38397	-1.03588	4.12615	-0.251053	0.801773	1
LOC101730888-like.L	4.33767	0.59146	2.83735	0.208455	0.834874	1
LOC101730911.S	5.8664	-0.854235	3.41131	-0.250413	0.802268	1
LOC101730997.L	2.30332	-0.597392	2.24734	-0.265822	0.790376	1
LOC101730999.S	3.35695	0.298243	2.44284	0.122088	0.902829	1
LOC101731079.L	6.88665	1.25947	2.03271	0.619603	0.535519	1
LOC101731168.L	5.58304	-0.560481	3.6519	-0.153476	0.878023	1
LOC101731180.S	1.69127	-2.87162	3.27792	-0.876049	0.381003	1
LOC101731218.L	3.24313	0.975699	2.62092	0.372273	0.709689	1
LOC101731218.S	29.0383	-0.260649	0.508042	-0.513046	0.607919	0.906015		X
LOC101731372.S	8.40743	0.958717	2.01439	0.475935	0.634121	1
LOC101731405.L	17.0575	-1.03567	0.680258	-1.52247	0.127891	1
LOC101731405.S	8.71573	-0.075145	1.30927	-0.0573946	0.954231	1
LOC101731429.L	1.59693	1.01166	3.60726	0.28045	0.779132	1
LOC101731434.L	2.26153	0.251749	4.12752	0.0609929	0.951365	1
LOC101731454.L	3.28299	3.84199	2.21578	1.73392	0.0829321	1
LOC101731502.L	3.57424	1.00836	2.53183	0.398272	0.69043	1
LOC101731502.S	3.59957	0.351468	3.92605	0.089522	0.928667	1
LOC101731543-like.S	4.09067	-0.211399	3.3229	-0.0636188	0.949274	1
LOC101731554.S	1.64587	0.409766	4.17785	0.0980806	0.921868	1
LOC101731617.L	7.41161	0.846461	1.62675	0.52034	0.602827	1
LOC101731617.S	6.8917	-0.610709	1.66434	-0.366938	0.713666	1
LOC101731668.S	7.81315	-1.10422	2.60401	-0.424047	0.671531	1
LOC101731680.S	1.58452	1.62286	3.63457	0.446508	0.65523	1
LOC101731692.S	6.32689	0.113362	2.5483	0.0444855	0.964517	1
LOC101731719.S	3.49693	-0.36239	2.80431	-0.129226	0.897179	1
LOC101731735.L	12.4238	0.111128	0.808731	0.13741	0.890707	1
LOC101731735.S	24.2249	0.232502	0.604223	0.384796	0.700389	0.936867
LOC101731753.L	4.0007	0.498126	2.23987	0.22239	0.82401	1
LOC101731778.L	1.39471	-0.112687	2.90279	-0.0388202	0.969034	1
LOC101731794.L	4.29594	-0.0930224	2.52585	-0.0368281	0.970622	1
LOC101731854.L	5.92034	-0.678634	2.21279	-0.306687	0.759082	1
LOC101731916.L	1.9288	0.582569	3.68165	0.158236	0.874271	1
LOC101731950.L	3.63534	-1.25751	3.38506	-0.371487	0.710275	1
LOC101731963.L	6.52818	-0.769196	2.04026	-0.37701	0.706166	1
LOC101731968.1.L	8.63319	0.387731	2.61702	0.148157	0.882219	1
LOC101731968.S	1.98182	-1.45612	4.12439	-0.35305	0.724051	1
LOC101732121.S	2.91631	0.817903	2.9582	0.276487	0.782174	1
LOC101732152.S	2.69927	0.47727	4.07027	0.117257	0.906656	1
LOC101732167.L	3.84769	0.45021	3.40328	0.132287	0.894757	1
LOC101732168.S	3.15595	1.13333	1.78747	0.634039	0.526055	1
LOC101732174.L	5.18358	-0.394922	2.06034	-0.191679	0.847994	1
LOC101732183.L	13.654	-0.27303	0.772549	-0.353414	0.723778	1
LOC101732265-like.L	2.41002	-0.931047	2.51669	-0.369949	0.711421	1
LOC101732299.L	11.7811	-0.0553301	0.988113	-0.0559958	0.955345	1
LOC101732303.L	1.52049	-1.42865	4.19672	-0.340422	0.733539	1
LOC101732334	6.52137	-0.194955	2.03082	-0.0959982	0.923522	1
LOC101732336.L	6.95105	-1.10342	0.96574	-1.14257	0.253219	1
LOC101732363.S	11.0015	-0.250038	0.869381	-0.287604	0.77365	1
LOC101732392.L	3.12686	1.07596	2.61849	0.410908	0.68114	1
LOC101732415.L	2.09932	-1.03552	4.16403	-0.248683	0.803606	1
LOC101732478.S	4.8525	0.576152	3.25355	0.177084	0.859442	1
LOC101732545.L	2.09602	0.312664	4.15548	0.0752413	0.940023	1
LOC101732646	18.2269	0.824892	0.592829	1.39145	0.164089	1
LOC101732656.L	3.93099	-0.707009	3.40236	-0.207799	0.835386	1
LOC101732657.1.S	2.23128	-2.65501	2.42784	-1.09357	0.274145	1
LOC101732657.L	2.36481	-0.963695	3.07872	-0.313018	0.754267	1
LOC101732678.L	4.03896	0.156455	3.86315	0.0404993	0.967695	1
LOC101732737.L	5.62436	0.556389	3.20332	0.173691	0.862108	1
LOC101732752.S	5.00881	-0.720301	2.57488	-0.279741	0.779676	1
LOC101732807.L	120.767	-1.27005	0.249088	-5.0988	3.41817e-07	1.09785e-05
LOC101732820.L	3.2901	0.84441	3.97346	0.212512	0.831707	1
LOC101732837.L	10.7059	0.591472	1.29492	0.456762	0.647842	1
LOC101732880.S	6.04429	0.182056	1.36603	0.133273	0.893977	1
LOC101732886.L	11.3027	0.755499	2.24906	0.335917	0.736933	1
LOC101732896.L	2.4216	-0.644024	3.12599	-0.206022	0.836774	1
LOC101732896.S	3.12624	0.47752	4.00473	0.119239	0.905086	1
LOC101732913.L	3.64149	-0.804006	3.37002	-0.238576	0.811434	1
LOC101732945.L	37.207	0.157904	1.53448	0.102904	0.918039	0.98774
LOC101732960.S	1.38236	-0.345567	3.13765	-0.110136	0.912302	1
LOC101732961.L	1.74949	0.501812	2.7204	0.184462	0.853651	1
LOC101732999.S	5.44644	3.46861	3.2269	1.0749	0.282417	1
LOC101733006.L	3.95211	0.519945	3.82872	0.135801	0.891978	1
LOC101733023.S	6.35259	-0.0121682	2.13353	-0.00570333	0.995449	1
LOC101733058.L	2.784	-1.36186	3.57929	-0.380484	0.703586	1
LOC101733073.L	3.82287	0.872753	3.41276	0.255733	0.798157	1
LOC101733100.L	5.5273	-0.83368	3.20735	-0.259928	0.794919	1
LOC101733142.L	5.66826	1.29647	2.06831	0.626824	0.530775	1
LOC101733157.L	6.05606	0.0265316	1.58054	0.0167864	0.986607	1
LOC101733178.L	28.012	1.0236	0.606445	1.68786	0.0914375	0.371236
LOC101733219.L	4.07998	0.121602	2.69252	0.0451631	0.963977	1
LOC101733219.S	2.18226	-1.18965	3.01542	-0.394523	0.693195	1
LOC101733221.L	8.97006	0.931293	1.74092	0.534943	0.592689	1
LOC101733232.S	8.73965	-0.242332	1.00101	-0.242087	0.808713	1
LOC101733276.L	2.97922	-0.841787	3.43	-0.245419	0.806132	1
LOC101733340.1.L	4.35753	0.856039	2.89343	0.295856	0.76734	1
LOC101733340.S	5.82993	0.228565	3.15051	0.0725486	0.942165	1
LOC101733353.L	2.288	-0.70297	4.07333	-0.172579	0.862983	1
LOC101733361.L	2.20947	-0.605133	2.23651	-0.270571	0.786721	1
LOC101733386.L	1.34408	0.416713	3.22917	0.129047	0.897321	1
LOC101733399.1.L	4.64055	-2.26915	1.85333	-1.22436	0.220817	1
LOC101733436.L	1.20391	0.302705	2.95492	0.102441	0.918407	1
LOC101733491.L	4.3939	0.147196	2.87481	0.0512021	0.959164	1
LOC101733491.S	4.11835	0.159798	2.74694	0.0581733	0.953611	1
LOC101733496-like.L	64.226	-0.405295	0.348134	-1.16419	0.244346	0.634317
LOC101733559.L	92.8664	-0.425238	0.291125	-1.46067	0.144105	0.483196
LOC101733560.1.S	595.272	-0.282053	1.55018	-0.181949	NA	1
LOC101733570.S	1.29132	0.952749	2.1719	0.43867	0.660901	1
LOC101733572.S	11.0312	1.42007	1.09425	1.29776	0.194369	1
LOC101733597.1.S	8.17074	-0.715665	1.54002	-0.46471	0.642139	1
LOC101733619.S	2.84757	1.28968	3.45689	0.373077	0.709091	1
LOC101733718-like.L	4.85888	1.02182	1.42994	0.714588	0.474864	1
LOC101733732.L	1.957	-1.03552	4.16403	-0.248683	0.803606	1
LOC101733745.L	2.76365	-0.840658	3.53712	-0.237667	0.812139	1
LOC101733806.L	2.67969	3.10341	3.1885	0.973312	0.330398	1
LOC101733839.L	1.86469	1.0105	3.68741	0.27404	0.784054	1
LOC101733845.L	3.66975	0.138952	3.17582	0.043753	0.965101	1
LOC101733845.S	10.5392	0.742085	2.07854	0.357022	0.721075	1
LOC101733888.L	7.68986	-0.0847052	2.0197	-0.0419395	0.966547	1
LOC101733890.L	3.4746	-0.900171	3.93051	-0.229021	0.818852	1
LOC101733911.L	19.952	0.107187	1.47377	0.07273	0.942021	0.992425
LOC101733911.S	30.6019	0.386209	1.57635	0.245003	0.806454	0.965009
LOC101734037.S	2.82773	-0.0152903	3.18372	-0.00480266	0.996168	1
LOC101734090.L	7.22855	0.0633359	2.86253	0.0221258	0.982348	1
LOC101734106.S	1.53332	-3.57184	4.11365	-0.868289	0.385236	1
LOC101734116.1.L	5.92641	-1.41724	1.76098	-0.804798	0.420936	1
LOC101734172.L	8.10433	0.788754	1.91761	0.411322	0.680836	1
LOC101734194.L	3.55468	1.49351	2.57534	0.579929	0.561963	1
LOC101734280.L	14.3215	0.519028	0.887551	0.584786	0.558692	1
LOC101734280.S	9.85944	-0.404058	1.19999	-0.336718	0.736329	1
LOC101734284-like.L	5.07625	0.743823	1.47626	0.503856	0.614363	1
LOC101734409.S	6.9377	-0.0153664	2.51005	-0.00612195	0.995115	1
LOC101734474.S	1.68502	3.02187	2.0586	1.46792	0.142125	1
LOC101734516.L	16.2684	1.58507	0.705707	2.24607	0.0246993	1
LOC101734522.1	6.62224	-0.443965	1.74541	-0.254361	0.799217	1
LOC101734545	8.82464	-0.324939	3.99053	-0.0814275	0.935102	1
LOC101734588.L	6.52017	-0.0336545	2.41014	-0.0139637	0.988859	1
LOC101734593.L	3.01621	0.997697	4.00048	0.249394	0.803056	1
LOC101734593.S	1.47872	2.51682	4.2722	0.589115	0.555784	1
LOC101734605.L	39.3707	0.145776	0.379178	0.384452	0.700644	0.936867
LOC101734608.L	2.45615	1.13739	2.63878	0.43103	0.666447	1
LOC101734609.L	3.10048	0.733178	3.47556	0.210952	0.832924	1
LOC101734609.S	2.98339	1.60954	3.42458	0.469998	0.638357	1
LOC101734643.L	6.03447	-0.158866	1.70585	-0.0931303	0.9258	1	X
LOC101734660.L	2.3804	0.66933	3.19731	0.209342	0.834181	1
LOC101734679.L	3.52064	0.0987656	3.45417	0.0285932	0.977189	1
LOC101734771.L	1.56682	0.474843	3.24105	0.146509	0.88352	1
LOC101734788.S	3.05726	0.116528	3.04118	0.0383167	0.969435	1
LOC101734852.S	1.24641	3.16626	3.45707	0.915879	0.35973	1
LOC101734868.L	2.78069	-0.51679	2.72607	-0.189573	0.849644	1
LOC101734868.S	5.29773	0.0447679	2.56944	0.0174232	0.986099	1
LOC101734895.1	1.64321	-0.963679	3.18568	-0.302503	0.762269	1
LOC101734975.L	1.82708	-1.26092	4.15423	-0.303527	0.761488	1
LOC101734975.S	2.53144	0.923743	3.46183	0.266837	0.789595	1
LOC101734998.L	2.65621	-0.769107	4.07815	-0.188592	0.850413	1
LOC101734999.S	86.4712	-0.532167	0.367695	-1.44731	0.147811	0.489723
LOC101735002.S	2.51535	2.07581	2.9401	0.706033	0.480167	1
LOC101735009.S	45.5705	0.883985	0.489137	1.80723	0.0707259	0.315152
LOC101735010.S	3.46245	-1.01411	2.09538	-0.483976	0.628403	1
LOC101735011.L	2.15711	-0.0152572	3.60976	-0.00422666	0.996628	1
LOC101735056.L	36.6619	-0.720812	0.623815	-1.15549	0.24789	0.638829
LOC101735082.S	4.39705	-0.67968	2.98238	-0.227899	0.819725	1
LOC101735116.L	2.00369	-1.88357	3.06824	-0.613894	0.539285	1
LOC101735121-like.L	41.4887	0.480639	0.488964	0.982975	0.32562	0.721685
LOC101735124-like.S	12.2564	0.0791833	0.961373	0.0823648	0.934357	1
LOC101735245.L	4.07522	0.407309	3.38988	0.120154	0.904361	1
LOC101735282.L	3.88514	1.26616	1.80952	0.69972	0.484102	1
LOC101735289.L	5.4796	-1.0234	3.63012	-0.28192	0.778005	1
LOC101735296.L	1.24146	0.409757	4.17785	0.0980784	0.92187	1
LOC105945196.S	6.72032	0.891809	2.29309	0.388912	0.697342	1
LOC105945384.S	2.93719	-0.686543	2.3151	-0.29655	0.76681	1
LOC105945417.L	30.2889	0.222082	0.729695	0.304348	0.760863	0.954019
LOC105945479	2.68665	-0.165909	3.28033	-0.0505769	0.959663	1
LOC105945545.L	5.94751	0.161154	1.56459	0.103	0.917963	1
LOC105945779	4.1263	-0.0963845	2.79308	-0.0345083	0.972472	1
LOC105945780.L	32.8065	0.0850512	0.95308	0.0892383	0.928893	0.989542
LOC105945786.L	5.92327	1.07716	2.90595	0.370676	0.710879	1
LOC105945872.L	6.07786	-0.545871	2.33308	-0.23397	0.815008	1
LOC105945929.L	3.80299	0.180486	3.4226	0.0527335	0.957944	1
LOC105946022.S	25.677	-0.59962	1.07663	-0.556944	0.577566	0.894472
LOC105946344.L	10.3085	-0.199177	2.38646	-0.0834612	0.933485	1
LOC105946425.L	4.65031	-0.6984	2.73282	-0.25556	0.79829	1
LOC105946653.L	1.52343	1.83618	4.12499	0.445135	0.656222	1
LOC105946688.L	42.1392	-2.93224	0.561232	-5.22466	1.74476e-07	5.91098e-06
LOC105946688.S	5.33022	-0.533691	1.6711	-0.319365	0.74945	1
LOC105946711.L	3.83506	-1.43115	3.41016	-0.419673	0.674724	1
LOC105946830.L	8.68573	-0.514639	2.3279	-0.221075	0.825034	1
LOC105946874.L	2.68298	1.58562	2.03863	0.777789	0.436693	1
LOC105946897.L	13.5207	0.477663	3.04007	0.157122	0.875149	1
LOC105946907.L	4.73173	0.498931	2.82525	0.176597	0.859825	1
LOC105946937.L	5.61136	1.08334	2.87824	0.376389	0.706628	1
LOC105947003.L	12.9785	0.469941	1.34648	0.349014	0.727079	1
LOC105947173.L	7.44063	0.642047	2.72241	0.235837	0.813559	1
LOC105947229.L	10.0249	1.07415	1.61304	0.665918	0.505463	1
LOC105947339.L	1.70235	-0.01786	2.6559	-0.00672467	0.994635	1
LOC105947410.L	38.4949	-1.10115	0.509147	-2.16273	0.0305622	0.181288
LOC105947422.S	1.69841	-2.40436	3.08622	-0.779063	0.435942	1
LOC105947450.S	50.6365	-0.204713	0.346192	-0.591327	0.554301	0.882283
LOC105947595.L	7.25835	-1.0484	2.63483	-0.3979	0.690704	1
LOC105947790.L	13.0058	-0.0399199	1.08318	-0.0368542	0.970601	1
LOC105947790.S	2.87554	0.831645	1.99925	0.415978	0.677426	1
LOC105947835.S	4.1594	-0.833206	2.26826	-0.367332	0.713371	1
LOC105947871.L	21.3428	0.431911	0.559636	0.771771	0.44025	0.814889
LOC105948127	5.91965	0.281089	1.91604	0.146704	0.883366	1
LOC105948388.L	2.60299	-1.64538	3.21547	-0.511706	0.608857	1
LOC105948534	2.60481	0.321188	2.70837	0.118591	0.9056	1
LOC105948557.L	2.79556	-0.653183	2.17301	-0.300589	0.763728	1
LOC108695208	2.64815	0.212411	3.06872	0.0692181	0.944816	1
LOC108695213	5.12756	-0.665529	2.12859	-0.312661	0.754538	1
LOC108695214	4.02253	0.161827	1.72969	0.0935582	0.92546	1
LOC108695215	4.59917	0.827998	2.77397	0.298488	0.76533	1
LOC108695216	2.0951	-0.572873	2.55935	-0.223835	0.822885	1
LOC108695217	37.0879	0.777783	0.424483	1.83231	0.0669056	0.303993
LOC108695218	3.12795	-0.747476	2.39029	-0.312713	0.754498	1
LOC108695220	5.20739	0.874039	2.15146	0.406253	0.684556	1
LOC108695221	35.6177	-0.292897	0.599648	-0.488448	0.625232	0.912756
LOC108695222	1.70271	-3.76262	4.14105	-0.908615	0.363553	1
LOC108695223	7.57103	0.285748	1.52094	0.187875	0.850974	1
LOC108695227	216.825	-0.858675	0.261657	-3.28169	0.00103189	0.0128455
LOC108695228	1.94903	0.890137	2.07694	0.42858	0.668229	1
LOC108695232	93.505	-0.442031	0.359817	-1.22849	0.219263	0.600924
LOC108695237	34.8896	-0.858331	0.402234	-2.13391	0.0328502	0.190956
LOC108695239	9.59285	-0.371148	0.845141	-0.439155	0.660549	1
LOC108695240	104.032	0.00330492	0.313827	0.010531	0.991598	0.998613
LOC108695241	2.90636	0.00848675	3.42431	0.00247838	0.998023	1
LOC108695243	3.24628	1.34553	2.20245	0.610926	0.541248	1
LOC108695244	5.61177	1.29922	1.60352	0.810231	0.417807	1
LOC108695246	2.59673	2.28404	2.50941	0.910189	0.362723	1
LOC108695247	247.022	-0.111476	0.192388	-0.579432	0.562298	0.88706
LOC108695251	85.0951	-1.29121	0.370051	-3.48928	0.000484326	0.00688352
LOC108695252	271.225	-0.194794	0.216095	-0.901428	0.367361	0.759292
LOC108695254	10.1289	-0.211932	1.25273	-0.169176	0.865658	1
LOC108695255	2.14238	0.210047	4.02449	0.0521921	0.958376	1
LOC108695257	1.38171	1.32722	2.53015	0.524562	0.599888	1
LOC108695258	18.5252	0.0503297	1.26938	0.039649	0.968373	1
LOC108695259	189.799	0.541704	0.171273	3.16281	0.00156255	0.0180376
LOC108695260	264.323	-0.460749	0.260722	-1.7672	0.077194	0.333196
LOC108695261	172.337	0.358115	0.183171	1.95508	0.0505736	0.253994
LOC108695263	58.51	-0.0820086	0.644185	-0.127306	0.898698	0.982733
LOC108695265	4.77446	-0.515802	1.68707	-0.305738	0.759804	1
LOC108695267	3.11784	-0.537487	3.45947	-0.155367	0.876532	1
LOC108695270	331.899	0.219113	0.247297	0.886033	0.3756	0.765937
LOC108695271	20.0968	0.852214	0.665946	1.2797	0.200649	0.574248
LOC108695273	11.6261	1.50672	1.94971	0.772794	0.439644	1
LOC108695274	10.9883	0.148627	2.12071	0.0700833	0.944127	1
LOC108695278	37.936	0.844356	0.489253	1.72581	0.0843821	0.351933
LOC108695279	4.93073	0.334451	2.12954	0.157053	0.875203	1
LOC108695284	7.59592	0.52773	2.41743	0.218302	0.827194	1
LOC108695285	176.815	0.859238	0.17159	5.00752	5.51371e-07	1.69929e-05
LOC108695286	1.66147	-0.362312	3.21217	-0.112793	0.910194	1
LOC108695287	2.09921	0.98192	3.02582	0.324513	0.74555	1
LOC108695290	4.05107	-1.88966	1.67331	-1.1293	0.258772	1
LOC108695294	15.243	-0.467054	0.737599	-0.633208	0.526598	1
LOC108695296	3.71251	0.540655	2.8694	0.188421	0.850547	1
LOC108695304	5.66509	1.32741	2.75049	0.482608	0.629374	1
LOC108695305	8.28933	0.28587	2.27084	0.125887	0.899821	1
LOC108695306	1.10402	0.596183	3.65557	0.163089	0.870448	1
LOC108695307	188.577	-0.907046	0.20629	-4.39694	1.0979e-05	0.000253148
LOC108695308	18.134	1.6824	0.82804	2.03179	0.0421748	1
LOC108695309	52.663	1.93777	0.683854	2.8336	0.0046027	0.0436741
LOC108695312	574.502	-0.0754012	0.284153	-0.265354	0.790737	0.961798
LOC108695316	68.0275	0.0598985	0.381342	0.157073	0.875187	0.978468
LOC108695319	2.86677	-1.03437	3.71317	-0.278567	0.780577	1
LOC108695321	3.33039	-1.56443	2.96459	-0.527705	0.597704	1
LOC108695328	2.54689	1.91392	2.05309	0.932215	0.351225	1
LOC108695329	447.15	-0.226192	0.207541	-1.08986	0.275773	0.672231
LOC108695330	3.30767	0.62149	1.7475	0.355646	0.722106	1
LOC108695331	85.914	-1.17284	0.474863	-2.46985	0.0135171	0.0991053
LOC108695332	489.6	-3.03915	0.297008	-10.2326	1.41731e-24	3.6417e-22
LOC108695335	2.60994	0.5739	1.88921	0.303778	0.761297	1
LOC108695339	2.58012	0.404936	4.05251	0.0999222	0.920406	1
LOC108695341	2.37184	1.32887	2.67182	0.497366	0.618931	1
LOC108695342	9.81582	0.536605	2.30923	0.232374	0.816248	1
LOC108695343	39.0159	0.196539	0.329496	0.596485	0.550851	0.880654
LOC108695344	10.1866	0.705954	1.26748	0.556974	0.577545	1
LOC108695345	3088.32	-0.136771	0.221346	-0.617903	0.536639	0.874158
LOC108695346	2.76547	-1.62189	2.64785	-0.61253	0.540187	1
LOC108695348	18.0732	0.512578	2.49188	0.205699	0.837026	1
LOC108695349	299.302	-0.275265	0.173332	-1.58808	0.112269	0.419231
LOC108695356	21.0249	-0.0238058	1.16108	-0.0205032	0.983642	0.997278
LOC108695358	5.35431	-2.73659	1.7895	-1.52925	0.126204	1
LOC108695359	62.2753	-0.34753	0.324305	-1.07161	0.283894	0.681075
LOC108695360	181.024	0.293637	0.214228	1.37068	0.170476	0.528026	X
LOC108695362	7.33242	0.960581	2.64566	0.363078	0.716547	1
LOC108695365	1.87993	1.84956	3.61804	0.511205	0.609208	1
LOC108695366	7.65957	0.706498	3.20048	0.220747	0.825289	1
LOC108695367	2.63956	0.675323	3.53609	0.19098	0.848541	1
LOC108695370	50.4787	-0.433617	0.363642	-1.19243	0.233093	0.620026
LOC108695373	62.5452	0.473966	0.412078	1.15018	0.250068	0.641517
LOC108695374	190.122	-0.0408643	0.221942	-0.184122	0.853918	0.974421
LOC108695380	17.7488	-0.812976	0.772059	-1.053	0.292342	1
LOC108695382	226.351	-0.382842	0.220838	-1.73359	0.0829913	0.348548
LOC108695383	2.55529	1.00034	4.08462	0.244904	0.80653	1
LOC108695386	9.80197	-0.322161	1.52507	-0.211244	0.832697	1
LOC108695387	9.44207	1.70892	1.1513	1.48434	0.137718	1
LOC108695393	1151.47	-0.172991	0.302125	-0.572582	0.566928	0.88935
LOC108695395	2.26798	-1.59026	2.78394	-0.571226	0.567846	1
LOC108695396	30.7119	-0.786272	0.525041	-1.49754	0.134252	0.463686	X
LOC108695398	27.4216	1.00208	1.23203	0.813362	0.41601	0.796894
LOC108695400	6.24279	1.36855	2.93176	0.466802	0.640641	1
LOC108695401	2.63883	4.02999	3.10652	1.29727	0.194538	1
LOC108695404	31.8285	-0.150391	0.52866	-0.284477	0.776045	0.958506
LOC108695405	12.0951	0.126459	1.70421	0.0742037	0.940848	1
LOC108695411	4.44388	-1.10016	2.94744	-0.37326	0.708955	1
LOC108695413	33.3568	-2.50626	0.539135	-4.64867	3.34079e-06	8.70127e-05
LOC108695414	4.59726	-0.182778	1.71625	-0.106499	0.915187	1
LOC108695416	3.32173	1.0569	1.62674	0.649704	0.515884	1
LOC108695417	35.7085	0.0275643	0.423945	0.0650184	0.948159	0.992425		X
LOC108695419	207.074	0.110892	0.211402	0.524555	0.599892	0.904188
LOC108695420	21.6312	0.729219	1.33814	0.544948	0.585789	0.897504
LOC108695421	2.26804	0.416897	3.21374	0.129723	0.896785	1
LOC108695426	14.4671	0.229167	1.4258	0.160729	0.872307	1
LOC108695427	81.9516	0.351553	0.302309	1.16289	0.244873	0.634893
LOC108695428	2.36675	-3.36836	3.18048	-1.05907	0.289566	1
LOC108695434	91.2954	0.592721	0.24896	2.38079	0.0172756	0.118708
LOC108695435	77.9573	0.407156	0.254633	1.59899	0.109822	0.413877
LOC108695436	4.91515	0.101294	3.29371	0.0307537	0.975466	1
LOC108695437	5.70286	-4.76136	1.76333	-2.70021	0.00692952	1
LOC108695438	88.4622	0.389501	0.295202	1.31944	0.187022	0.554063
LOC108695440	718.068	-0.607805	0.219977	-2.76303	0.00572672	0.0522998
LOC108695447	6.55887	-0.493065	3.09176	-0.159477	0.873293	1
LOC108695448	1.22114	-0.014796	3.31928	-0.0044576	0.996443	1
LOC108695449	6.90827	-1.39599	1.03911	-1.34344	0.179128	1
LOC108695450	19.5023	0.535959	1.45363	0.368704	0.712349	1
LOC108695452	1.5019	1.34246	4.19781	0.319801	0.749119	1
LOC108695453	114.346	0.36093	0.245371	1.47096	0.141302	0.478074
LOC108695457	38.3038	0.663598	0.428487	1.5487	0.121454	0.4387
LOC108695458	84.4938	-0.140541	0.265596	-0.529152	0.5967	0.902411
LOC108695459	211.213	0.952652	0.233159	4.08585	4.3916e-05	0.000859822
LOC108695462	10.6003	-0.674181	1.32852	-0.507469	0.611826	1
LOC108695463	221.976	-0.0188436	0.231357	-0.081448	0.935086	0.990713
LOC108695464	20.0431	-0.251108	2.14589	-0.117018	0.906846	0.985487
LOC108695465	57.6935	-2.22399	0.667861	-3.33003	0.00086838	0.0111562		X
LOC108695467	8.98125	-0.523943	2.43945	-0.214779	0.829939	1
LOC108695468	2.61093	0.449149	3.43529	0.130745	0.895977	1
LOC108695469	3.2526	0.0559156	1.8102	0.0308892	0.975358	1
LOC108695470	2.51794	-2.41685	3.24701	-0.744328	0.456678	1
LOC108695472	7.16558	-0.335635	2.07649	-0.161635	0.871593	1
LOC108695473	12.2518	-0.294908	1.6584	-0.177827	0.858859	1
LOC108695474	90.6856	-0.111023	0.304446	-0.364673	0.715355	0.940511
LOC108695475	5.26331	-0.22722	2.88518	-0.0787544	0.937228	1
LOC108695477	1.85296	-0.242301	3.44751	-0.0702828	0.943969	1
LOC108695484	19.4046	-1.42967	1.35418	-1.05575	0.291083	1
LOC108695486	3.42359	-0.32439	2.47889	-0.130861	0.895885	1
LOC108695487	30.3838	0.268627	0.718616	0.373812	0.708544	0.938318
LOC108695489	7.75059	0.600321	2.50218	0.239919	0.810393	1
LOC108695490	5.27629	0.310462	2.98263	0.10409	0.917098	1
LOC108695491	4.94227	-0.632206	1.51608	-0.417	0.676678	1
LOC108695492	204.961	-0.714505	0.2177	-3.28207	0.0010305	0.0128352
LOC108695493	33.0513	0.253915	1.60904	0.157806	0.87461	0.978397
LOC108695494	31.0161	0.358183	0.62894	0.569502	0.569015	0.889792
LOC108695496	7.18748	0.0384905	1.81613	0.0211937	0.983091	1
LOC108695497	3.75925	-0.900351	3.89566	-0.231116	0.817224	1
LOC108695498	14.7208	0.523089	0.972746	0.537745	0.590753	1
LOC108695500	14.2321	-0.412133	1.41361	-0.291547	0.770633	1
LOC108695501	28.1864	-0.0678152	0.497314	-0.136363	0.891534	0.981723
LOC108695502	175.839	0.188901	0.264681	0.713693	0.475417	0.838408
LOC108695503	86.735	-0.0253552	0.258515	-0.0980804	0.921868	0.988467
LOC108695504	37.4472	0.445109	0.651521	0.683184	0.49449	0.85061
LOC108695505	88.5553	-0.266339	0.355558	-0.749073	0.453814	0.8235		X
LOC108695506	48.9862	0.668162	0.520173	1.2845	0.198967	0.571965
LOC108695507	7.98729	0.444986	2.657	0.167477	0.866995	1
LOC108695509	45.0653	0.261399	0.334679	0.781044	0.434777	0.81104
LOC108695511	46.0025	0.464915	0.391919	1.18625	0.235522	0.623098
LOC108695512	84.0595	0.193687	0.277614	0.697687	0.485373	0.844491
LOC108695513	17.0214	0.843277	1.36678	0.616979	0.537249	1
LOC108695514	9.14163	0.832139	2.08299	0.399492	0.689531	1
LOC108695515	87.4238	0.799375	0.352218	2.26954	0.0232354	0.147966
LOC108695517	61.7253	0.175661	0.278531	0.630668	0.528258	0.868829
LOC108695518	110.105	-0.348973	0.218054	-1.6004	0.10951	0.413099
LOC108695519	62.472	0.909896	0.280546	3.24331	0.00118151	0.0143184
LOC108695520	68.8136	0.250769	0.328007	0.764525	0.444554	0.818462
LOC108695521	57.093	0.274955	0.402545	0.683042	0.494581	0.850637
LOC108695522	29.8681	-0.751978	0.707723	-1.06253	0.287995	0.684789
LOC108695524	4.0305	0.171613	2.76808	0.0619973	0.950565	1
LOC108695525	76.9832	-0.404124	0.250876	-1.61085	0.107212	0.408314
LOC108695526	55.3099	0.559303	0.474937	1.17764	0.238942	0.627618
LOC108695527	385.184	-0.10388	0.232305	-0.447172	0.654751	0.922324
LOC108695528	34.3273	0.260861	0.494556	0.527465	0.59787	0.902926
LOC108695529	26.3071	0.59541	0.780026	0.763321	0.445272	0.818923
LOC108695530	21.3779	-0.787177	1.30315	-0.604059	0.545804	0.878542
LOC108695531	4.89197	0.111578	3.30629	0.0337471	0.973079	1
LOC108695532	56.2425	0.0194054	0.379477	0.0511373	0.959216	0.994173
LOC108695533	10.3883	0.279006	1.33691	0.208694	0.834687	1
LOC108695534	8.42111	-0.318142	1.40387	-0.226618	0.820721	1
LOC108695535	75.4761	-0.0157448	0.338329	-0.0465371	0.962882	0.99475
LOC108695536	60.3896	-0.0586046	0.41989	-0.139571	0.888999	0.981207
LOC108695537	71.3489	-0.195389	0.361744	-0.540131	0.589107	0.899542
LOC108695538	51.9325	-0.281241	0.328267	-0.856744	0.391587	0.780053
LOC108695539	82.3918	0.146242	0.282661	0.517375	0.604895	0.905489
LOC108695540	17.6822	0.0720072	1.22314	0.0588706	0.953055	1
LOC108695541	14.042	0.329271	0.944415	0.348651	0.727352	1
LOC108695543	16.0308	0.640159	1.03517	0.618413	0.536303	1
LOC108695544	47.0287	-0.0709711	0.49781	-0.142567	0.886632	0.980901
LOC108695545	2.71168	0.21001	4.06139	0.051709	0.958761	1
LOC108695546	5.62669	-0.0606729	1.20906	-0.0501818	0.959978	1
LOC108695547	7.46027	-1.03361	1.29331	-0.799199	0.424175	1
LOC108695548	77.1731	0.23048	0.305747	0.753825	0.450954	0.822389
LOC108695549	31.1982	-0.959154	0.556615	-1.72319	0.0848538	0.353256
LOC108695550	4.10701	-1.0852	1.81423	-0.59816	0.549733	1
LOC108695551	22.2813	-0.474324	1.01869	-0.46562	0.641487	0.917515
LOC108695552	32.9389	-0.100735	1.57601	-0.0639176	0.949036	0.992752
LOC108695554	23.1098	-0.385703	0.495986	-0.777648	0.436777	0.812468
LOC108695555	8.69864	0.388088	1.36773	0.283746	0.776605	1
LOC108695556	23.0855	0.163565	0.591593	0.276482	0.782178	0.959372
LOC108695557	47.5065	-0.161011	0.331903	-0.485115	0.627595	0.913223
LOC108695558	2.08361	0.737757	4.1695	0.176941	0.859555	1
LOC108695559	7.99329	-0.801952	1.42641	-0.562216	0.573969	1
LOC108695560	2.21853	-0.299711	1.80946	-0.165635	0.868444	1
LOC108695561	56.3974	-0.0208311	0.468953	-0.0444205	0.964569	0.99475
LOC108695562	26.0682	0.301218	0.552024	0.54566	0.585299	0.897394
LOC108695563	81.9332	-0.783441	0.33977	-2.3058	0.0211219	0.138055
LOC108695564	31.8473	0.570168	0.585092	0.974493	0.329812	0.725876
LOC108695565	32.1292	0.209815	0.431512	0.486232	0.626803	0.912862
LOC108695566	0.960117	-0.85696	2.68018	-0.31974	0.749166	1
LOC108695567	24.917	0.790645	0.634032	1.24701	0.212393	0.59253
LOC108695568	112.78	-0.241933	0.250434	-0.966054	0.334017	0.729747
LOC108695569	12.4905	-0.228381	1.25439	-0.182065	0.855531	1
LOC108695570	224.626	0.275504	0.175196	1.57255	0.115823	0.42645
LOC108695571	5.91344	0.0529184	1.95835	0.0270219	0.978442	1
LOC108695572	34.4544	-1.277	2.18429	-0.58463	0.558797	0.884574
LOC108695573	8.31228	-0.422865	1.19954	-0.352522	0.724447	1
LOC108695574	149.308	-0.0368477	0.204036	-0.180594	0.856686	0.974701
LOC108695575	101.621	-0.0361467	0.47123	-0.0767072	0.938856	0.991764
LOC108695576	303.988	-0.248445	0.321053	-0.773845	0.439022	0.814282
LOC108695577	123.41	-0.0314217	0.356979	-0.0880212	0.92986	0.989575
LOC108695578	2.16591	-0.687519	3.53486	-0.194497	0.845787	1
LOC108695579	381.285	-0.36296	0.578502	-0.627413	0.530388	0.870479
LOC108695580	268.723	-0.164962	0.208754	-0.790221	0.429399	0.807192
LOC108695581	14.7618	-0.883017	2.85468	-0.309323	0.757076	1
LOC108695582	529.901	0.0711456	0.224958	0.316262	0.751803	0.951161
LOC108695583	48.945	0.379791	0.382114	0.993922	0.320261	0.716187
LOC108695584	2.25554	-0.393236	3.15317	-0.124711	0.900752	1
LOC108695585	56.2672	-0.504518	0.384136	-1.31338	0.189054	0.556009
LOC108695586	54.6837	-0.139771	0.363492	-0.384523	0.700591	0.936867		X
LOC108695587	27.775	-0.592807	4.08548	-0.145101	0.884631	0.980378
LOC108695588	8.32688	0.271989	1.24638	0.218223	0.827255	1
LOC108695589	6.90517	0.148376	2.49638	0.0594365	0.952604	1
LOC108695591	8.67197	-1.27038	1.22549	-1.03663	0.29991	1	X
LOC108695592	304.817	-1.15681	0.828908	-1.39558	0.162841	0.515053
LOC108695593	2.05223	-0.873391	2.74155	-0.318575	0.750049	1
LOC108695598	1.46598	2.33403	2.28151	1.02302	0.306298	1
LOC108695610	2.71924	1.76221	3.47923	0.506495	0.612509	1
LOC108695611	3.96869	-0.679185	3.04549	-0.223013	0.823525	1
LOC108695612	5.92265	-0.561489	3.29016	-0.170657	0.864494	1
LOC108695613	1.82023	2.04664	3.57207	0.572956	0.566675	1
LOC108695614	3.99331	-0.169431	3.39392	-0.049922	0.960185	1
LOC108695615	1.20679	-0.170033	3.59264	-0.0473281	0.962252	1
LOC108695616	3.55202	0.646298	3.36905	0.191834	0.847872	1
LOC108695628	3.09373	-1.5612	3.07049	-0.508451	0.611137	1
LOC108695629	1.735	-0.644815	3.64199	-0.17705	0.859469	1
LOC108695630	1.58916	2.03176	4.09259	0.49645	0.619577	1
LOC108695632	3.5676	0.768926	2.18074	0.352599	0.724389	1
LOC108695633	1.54842	-0.579734	3.07946	-0.188258	0.850674	1
LOC108695634	1.80391	-1.64009	4.19245	-0.3912	0.695649	1
LOC108695635	1.66384	4.73015	4.05915	1.1653	0.243896	1
LOC108695636	6.72522	0.159338	2.31724	0.0687617	0.945179	1
LOC108695637	2.89906	-0.23879	3.44755	-0.0692637	0.94478	1
LOC108695638	25.7758	0.270075	0.974451	0.277156	0.78166	0.959368
LOC108695639	8.34431	-0.476791	1.64002	-0.290722	0.771264	1
LOC108695641	1.82214	0.579739	4.14991	0.139699	0.888898	1
LOC108695643	4.52305	0.250031	3.78465	0.0660647	0.947326	1
LOC108695645	4.21687	-0.0154403	3.83051	-0.00403087	0.996784	1
LOC108695646	3.6843	-1.02975	3.48916	-0.29513	0.767895	1
LOC108695647	1.54243	-1.26088	4.16009	-0.30309	0.761821	1
LOC108695648	3.48014	-1.38754	3.44897	-0.402305	0.687459	1
LOC108695649	2.5743	-1.20294	4.06602	-0.295852	0.767343	1
LOC108695651	1.82839	0.112393	3.14219	0.0357689	0.971467	1
LOC108695653	0.843544	3.7246	3.37667	1.10304	0.270009	1
LOC108695655	1.1546	-2.94686	3.6129	-0.81565	0.4147	1
LOC108695659	10.7958	-0.350352	0.982815	-0.356478	0.721483	1
LOC108695660	12.2889	0.250918	1.98358	0.126498	0.899338	1
LOC108695661	4.76831	-0.21128	2.90722	-0.0726743	0.942065	1
LOC108695662	2.69927	0.47727	4.07027	0.117257	0.906656	1
LOC108695663	2.31319	1.43272	3.64453	0.393116	0.694234	1
LOC108695665	15.5187	0.619101	1.49139	0.415117	0.678056	1
LOC108695666	6.84674	-0.663475	2.20927	-0.300315	0.763937	1
LOC108695667	71.6827	-0.477945	0.355391	-1.34484	0.178677	0.540688
LOC108695668	68.0244	0.286699	1.10684	0.259025	0.795616	0.962929		X
LOC108695669	28.8121	0.949738	0.623915	1.52222	0.127953	0.452246
LOC108695671	1310.02	-1.24884	0.23789	-5.24967	1.52375e-07	5.24777e-06
LOC108695672	50.4399	-0.336636	0.306243	-1.09924	0.271662	0.667966
LOC108695673	126.461	0.227398	0.268386	0.847277	0.396841	0.784144
LOC108695674	3.76851	0.135637	2.63994	0.0513789	0.959024	1
LOC108695675	2.00179	-1.19335	2.39438	-0.498396	0.618205	1
LOC108695678	15.8688	1.5983	1.23909	1.2899	0.197087	1
LOC108695679	896.102	-0.510779	0.236345	-2.16116	0.0306829	0.181698
LOC108695680	10.6332	0.984409	2.15767	0.456237	0.64822	1
LOC108695683	13.0037	-0.109481	4.07404	-0.0268729	0.978561	1
LOC108695685	1.564	-1.39668	3.25029	-0.42971	0.667407	1
LOC108695686	1.53167	-1.8668	4.12294	-0.452785	0.650704	1
LOC108695689	22.9954	-0.85005	0.76921	-1.1051	0.269118	0.664985
LOC108695690	162.053	-0.257524	0.270167	-0.953203	0.340487	0.734969
LOC108695691	58.4308	-0.014909	0.516007	-0.028893	0.97695	0.99615
LOC108695693	4.91845	-0.367123	3.29232	-0.111509	0.911213	1
LOC108695694	30.4509	-0.012284	0.819055	-0.0149978	0.988034	0.998187
LOC108695696	45.3284	-0.384083	1.118	-0.343545	0.731188	0.944513
LOC108695697	3.76658	0.569673	2.38304	0.239053	0.811065	1
LOC108695700	130.696	0.468574	0.247597	1.89248	0.0584265	0.28005	X
LOC108695702	5.82383	0.030271	2.66046	0.0113781	0.990922	1
LOC108695703	47.5764	0.770071	0.417365	1.84508	0.0650264	0.298359
LOC108695704	9.28671	-0.464166	2.08539	-0.222579	0.823863	1
LOC108695705	4.23271	0.0654237	2.92542	0.0223639	0.982158	1
LOC108695708	7.11495	0.271178	2.78585	0.0973411	0.922455	1
LOC108695710	2.01241	1.36261	3.36392	0.405066	0.685429	1
LOC108695711	31.8537	0.265269	0.967732	0.274115	0.783997	0.960054
LOC108695714	3.52711	-1.05671	2.90192	-0.36414	0.715753	1
LOC108695721	2.53541	-0.0153673	4.1036	-0.00374484	0.997012	1
LOC108695725	4.47088	-0.90089	3.79738	-0.23724	0.812471	1
LOC108695726	2.35162	1.76107	3.52866	0.499075	0.617727	1
LOC108695727	3.45467	-1.05739	3.04434	-0.347331	0.728342	1
LOC108695728	2.40524	0.253333	3.53012	0.0717632	0.94279	1
LOC108695729	1.54415	0.412032	3.78495	0.108861	0.913313	1
LOC108695731	2.39891	2.20313	4.10557	0.536619	0.591531	1
LOC108695733	1.37963	-0.365262	3.59426	-0.101624	0.919055	1
LOC108695734	2.10514	1.23024	4.15279	0.296243	0.767044	1
LOC108695735	267.562	-1.27602	0.190001	-6.71584	1.86984e-11	1.28022e-09
LOC108695737	2.91277	-0.0154586	3.87681	-0.00398744	0.996818	1
LOC108695738	1.39913	-0.0149676	3.68906	-0.0040573	0.996763	1
LOC108695739	10.0012	-0.405011	2.38077	-0.170118	0.864918	1
LOC108695740	262.949	-0.495535	0.18401	-2.69298	0.00708175	0.0613662
LOC108695741	3.47539	0.631836	2.06808	0.305517	0.759972	1
LOC108695742	3.37336	0.437071	1.79035	0.244126	0.807133	1
LOC108695744	2.05654	0.520903	3.10246	0.1679	0.866662	1
LOC108695745	2.54415	0.381935	2.60795	0.14645	0.883566	1
LOC108695747	1.73467	-1.97863	3.48376	-0.567959	0.570063	1
LOC108695749	1.50093	-1.67285	3.46995	-0.482096	0.629738	1
LOC108695751	3.2461	-0.0153857	3.47062	-0.00443311	0.996463	1
LOC108695752	3.35468	2.04858	2.87307	0.71303	0.475827	1
LOC108695753	43.0698	-0.179875	0.35838	-0.501913	0.615729	0.909524
LOC108695754	10.1723	0.471119	1.34027	0.351509	0.725206	1
LOC108695756	83.7381	0.268545	0.240931	1.11461	0.265017	0.660731
LOC108695757	1118.87	-0.902053	0.256575	-3.51574	0.000438522	0.0063269
LOC108695758	9.75092	1.63447	1.01828	1.60513	0.108465	1
LOC108695759	67.796	-0.291852	0.472393	-0.617816	0.536696	0.874158
LOC108695760	1.93842	-1.27173	3.18342	-0.399484	0.689536	1
LOC108695761	75.7821	0.345311	0.350001	0.986599	0.323839	0.719986
LOC108695762	61.4175	0.443644	1.03994	0.426606	0.669666	0.926567
LOC108695763	14.3682	0.467377	2.75964	0.169362	0.865512	1
LOC108695764	14.6503	0.0677775	1.25631	0.0539496	0.956975	1
LOC108695767	1.72319	1.48351	3.30866	0.448371	0.653886	1
LOC108695771	2.70977	1.17863	3.48503	0.338198	0.735214	1
LOC108695772	9.53798	0.253424	1.93864	0.130722	0.895995	1
LOC108695773	2.44721	-0.726271	2.80271	-0.259132	0.795534	1
LOC108695774	1302.54	-0.248774	0.296374	-0.839392	0.401249	0.786505
LOC108695775	8.40483	0.626279	2.16247	0.289612	0.772113	1
LOC108695776	1.49243	1.03308	3.30555	0.312528	0.754639	1
LOC108695777	252.439	-0.17646	0.187472	-0.941261	0.346571	0.741171
LOC108695778	2.287	-0.616222	3.3085	-0.186254	0.852246	1
LOC108695780	3.45784	0.0864956	2.74869	0.0314679	0.974896	1
LOC108695781	60.4222	-0.535006	0.332601	-1.60855	0.107715	0.409309
LOC108695782	12.092	0.130651	1.81188	0.072108	0.942516	1
LOC108695783	55.3491	-0.608074	0.417923	-1.45499	0.145672	0.486084
LOC108695784	2.65301	-0.0152959	3.25538	-0.00469866	0.996251	1
LOC108695785	36.5216	-4.18353	0.625469	-6.68862	2.25283e-11	1.51079e-09
LOC108695787	298.578	0.258615	0.280233	0.922857	0.356082	0.749529		X
LOC108695788	4.1939	-0.504181	2.65464	-0.189924	0.849368	1
LOC108695789	154.154	-0.130485	0.327092	-0.398924	0.689949	0.932909
LOC108695791	6.59608	0.254875	2.57202	0.0990953	0.921063	1
LOC108695792	9.76395	-0.390754	2.08029	-0.187836	0.851005	1
LOC108695794	2.54473	-0.5125	3.19267	-0.160524	0.872468	1
LOC108695795	102.583	0.676946	0.223909	3.0233	0.00250031	0.0265816
LOC108695796	3.35701	2.64317	3.45645	0.764706	0.444447	1
LOC108695797	96.8097	0.308209	0.298385	1.03292	0.301639	0.699534
LOC108695798	9.19557	-0.744083	1.77338	-0.419585	0.674789	1
LOC108695799	17.4562	-0.429718	0.70761	-0.60728	0.543665	1
LOC108695800	2.50635	1.33215	3.51164	0.379352	0.704427	1
LOC108695801	3.13168	-0.433587	3.08526	-0.140535	0.888237	1
LOC108695803	5.82827	-0.193549	2.08015	-0.093046	0.925867	1
LOC108695804	116.962	-1.00628	0.278438	-3.61403	0.000301473	0.0045747
LOC108695805	4.07847	0.256603	2.07994	0.12337	0.901814	1
LOC108695807	7.22748	3.46364	1.28648	2.69233	0.00709552	1
LOC108695808	5.72211	-0.756502	1.65452	-0.457235	0.647502	1
LOC108695810	4.6716	-0.399178	3.02835	-0.131814	0.895132	1
LOC108695812	7.46811	-0.077299	1.28861	-0.0599865	0.952166	1
LOC108695813	354.957	-0.232348	0.181575	-1.27962	0.200678	0.574248
LOC108695814	1127.71	0.386573	0.261654	1.47742	0.139562	0.474433
LOC108695815	12.1056	-1.19824	0.7913	-1.51426	0.129959	1
LOC108695816	7.87914	0.503051	1.63109	0.308414	0.757767	1
LOC108695817	21.2726	0.0728252	1.19369	0.0610085	0.951352	0.993068
LOC108695820	5.46786	-0.933847	3.25389	-0.286995	0.774117	1
LOC108695821	8.7122	1.36324	1.63226	0.835183	0.403615	1
LOC108695822	16.0362	2.69559	1.177	2.29022	0.0220084	1
LOC108695823	1.38661	2.08266	3.77392	0.551855	0.581048	1
LOC108695825	1.99676	1.17149	4.14067	0.282923	0.777236	1
LOC108695826	8.25101	0.542087	2.21936	0.244254	0.807034	1
LOC108695828	3.53286	-1.74548	3.4985	-0.498922	0.617834	1
LOC108695829	8.91454	0.083218	1.17645	0.0707368	0.943607	1
LOC108695830	4.8883	-0.482418	2.43311	-0.198272	0.842832	1
LOC108695831	4.82565	0.999508	3.17741	0.314567	0.753091	1
LOC108695832	3.90088	-0.516076	2.78981	-0.184986	0.85324	1
LOC108695833	14.6597	-0.867199	1.44356	-0.600736	0.548016	1
LOC108695834	3.9073	-0.383007	1.99566	-0.19192	0.847805	1
LOC108695836	3.15013	0.483438	2.90751	0.166272	0.867943	1
LOC108695837	11.2749	-1.0156	1.34142	-0.757107	0.448986	1
LOC108695839	3.76778	-0.808815	2.85648	-0.283151	0.777061	1
LOC108695840	1.96483	-2.29373	3.02617	-0.757965	0.448472	1
LOC108695842	5.45042	0.101875	2.76578	0.0368341	0.970617	1
LOC108695843	5.57611	-1.31735	2.10541	-0.625698	0.531513	1
LOC108695845	51.7223	0.634998	1.0211	0.621876	0.534024	0.872638
LOC108695846	8.43054	0.167518	2.6627	0.0629129	0.949836	1
LOC108695847	2.55673	-0.52453	3.02451	-0.173426	0.862316	1
LOC108695848	0.794305	0.999322	3.75628	0.26604	0.790208	1
LOC108695849	2.54068	-0.842962	2.85042	-0.295733	0.767434	1
LOC108695850	4.50919	0.322282	2.63932	0.122108	0.902813	1
LOC108695851	1.68016	-0.821355	3.58285	-0.229246	0.818678	1
LOC108695855	2.69597	1.59791	4.06083	0.393493	0.693956	1
LOC108695859	1.80382	-0.0149893	3.05526	-0.00490605	0.996086	1
LOC108695860	13.8425	0.545583	1.75529	0.310822	0.755936	1
LOC108695861	17.9806	0.265833	1.32811	0.200159	0.841356	1
LOC108695864	4.40405	1.38756	3.25621	0.426126	0.670016	1
LOC108695867	9.61519	0.74682	2.32446	0.321287	0.747993	1
LOC108695870	4.35168	-0.243809	2.9849	-0.0816805	0.934901	1
LOC108695871	3.81714	-0.609445	3.09888	-0.196666	0.844089	1
LOC108695872	2.22758	-0.0153278	4.15267	-0.00369108	0.997055	1
LOC108695874	4.33987	0.629561	2.62564	0.239775	0.810505	1
LOC108695875	4.37684	2.11982	3.27877	0.646529	0.517937	1
LOC108695876	2.38671	0.254575	3.20814	0.0793528	0.936752	1
LOC108695877	5.47003	0.0884429	2.55166	0.034661	0.97235	1
LOC108695878	5.75101	0.267887	2.88219	0.0929457	0.925947	1
LOC108695879	7.17802	0.606056	3.17453	0.190912	0.848594	1
LOC108695880	3.20378	-0.295751	3.09343	-0.0956063	0.923833	1
LOC108695881	2.6156	0.798616	2.9709	0.268813	0.788074	1
LOC108695882	4.73986	-0.433721	3.68464	-0.117711	0.906297	1
LOC108695883	4.40576	-0.60812	3.00206	-0.202568	0.839473	1
LOC108695884	4.52774	-0.281671	3.29426	-0.0855034	0.931861	1
LOC108695885	3.78614	-1.21129	3.34617	-0.361993	0.717357	1
LOC108695886	15.8298	-0.500847	2.68071	-0.186834	0.851791	1
LOC108695887	1.70684	-2.87969	2.6477	-1.08762	0.276762	1
LOC108695890	23.0591	0.128379	1.15837	0.110827	0.911754	0.986048
LOC108695891	9.07884	1.40056	1.58076	0.886009	0.375613	1
LOC108695892	1.8687	0.489324	2.75954	0.177321	0.859256	1
LOC108695894	37.9824	0.895507	0.551849	1.62274	0.104645	0.402777
LOC108695895	7.55413	0.666748	1.45772	0.45739	0.64739	1
LOC108695896	2.4589	0.723229	3.44376	0.210011	0.833659	1
LOC108695897	2.92586	0.21108	3.51757	0.0600071	0.95215	1
LOC108695899	6.81701	-0.0972411	1.42845	-0.0680747	0.945726	1
LOC108695900	3.0615	-1.63505	3.66274	-0.446401	0.655308	1
LOC108695901	289.279	-0.45343	0.253323	-1.78993	0.0734653	0.32283
LOC108695902	10.688	-0.0012785	2.03037	-0.00062969	0.999498	1
LOC108695903	6.08957	0.575895	3.03304	0.189874	0.849408	1
LOC108695904	6.63955	-0.849602	2.63927	-0.321908	0.747522	1
LOC108695906	204.648	-0.037397	2.34213	-0.0159671	0.987261	0.998187
LOC108695907	10.6898	0.801395	3.99257	0.200722	0.840916	1
LOC108695909	2.57847	0.84395	4.04933	0.208417	0.834903	1
LOC108695911	5.89069	-0.224586	2.80026	-0.0802018	0.936077	1
LOC108695912	612.4	0.0471743	0.246345	0.191497	0.848137	0.973233
LOC108695914	1.80496	0.46766	3.60491	0.129729	0.896781	1
LOC108695917	1.79009	-1.26491	2.60767	-0.485072	0.627625	1
LOC108695918	7.11283	0.809584	2.04853	0.395201	0.692694	1
LOC108695919	4.72001	0.213194	1.98179	0.107577	0.914331	1
LOC108695920	4.24721	-0.482233	3.10115	-0.155501	0.876426	1
LOC108695921	5.42881	-0.341327	2.41024	-0.141615	0.887384	1
LOC108695922	4.2983	0.0950565	1.6514	0.0575612	0.954098	1
LOC108695923	5.03557	-0.11249	2.01765	-0.055753	0.955539	1
LOC108695924	1.49113	1.01447	4.2061	0.24119	0.809408	1
LOC108695925	1.70578	-3.14807	3.73471	-0.84292	0.399273	1
LOC108695926	6.14392	-0.525881	2.55921	-0.205485	0.837193	1
LOC108695927	3.4065	0.488359	2.64057	0.184945	0.853272	1
LOC108695929	6.67558	0.328335	3.28113	0.100068	0.920291	1
LOC108695931	18.736	-0.162902	1.26014	-0.129273	0.897142	1
LOC108695932	2.68103	-1.26182	4.07404	-0.309723	0.756772	1
LOC108695933	3.16348	-0.210421	3.9894	-0.0527449	0.957935	1
LOC108695935	1.65828	-0.01534	4.16386	-0.00368409	0.997061	1
LOC108695936	1.80391	-1.64009	4.19245	-0.3912	0.695649	1
LOC108695937	2.39494	-2.26466	3.20472	-0.706663	0.479776	1
LOC108695940	3.87287	1.33079	2.94671	0.451619	0.651543	1
LOC108695941	4.21358	0.575488	3.82855	0.150315	0.880516	1
LOC108695942	1.48949	2.84481	4.26183	0.667508	0.504448	1
LOC108695943	3.31102	0.166183	2.2289	0.0745584	0.940566	1
LOC108695944	5.22501	0.0690235	2.38437	0.0289484	0.976906	1
LOC108695945	4.3226	-0.877526	2.89624	-0.302988	0.761899	1
LOC108695946	3.69357	0.680065	3.02324	0.224946	0.822021	1
LOC108695947	3.50501	-0.513102	2.64622	-0.1939	0.846254	1
LOC108695948	2.63148	-0.61659	3.27023	-0.188546	0.850449	1
LOC108695949	1.88718	-0.511064	3.62824	-0.140857	0.887983	1
LOC108695950	3.70398	0.62425	2.28616	0.273056	0.78481	1
LOC108695952	4.51228	-0.541694	2.76115	-0.196184	0.844466	1
LOC108695953	5.88408	-0.501735	2.91864	-0.171907	0.863511	1
LOC108695954	1.65993	-0.768413	4.16956	-0.184291	0.853785	1
LOC108695955	23.5378	-0.208502	4.08631	-0.0510245	NA	1
LOC108695959	16.2838	-0.337756	1.56401	-0.215956	0.829022	1
LOC108695960	873.494	0.177524	0.199866	0.888212	0.374427	0.764975
LOC108695961	99.4637	0.401103	0.298652	1.34305	0.179257	0.541369
LOC108695962	211.454	0.693278	0.230254	3.01092	0.00260454	0.0274021
LOC108695963	3.67885	-0.705941	3.54447	-0.199167	0.842132	1
LOC108695964	1.3904	0.0399429	3.49873	0.0114164	0.990891	1
LOC108695965	409.232	-0.265016	0.221349	-1.19727	0.2312	0.617217
LOC108695966	3.61111	-1.81113	2.88393	-0.62801	0.529998	1
LOC108695967	44.9771	0.879735	0.644221	1.36558	0.172071	0.530455
LOC108695968	14.5311	0.519767	1.10441	0.470628	0.637906	1
LOC108695969	3.4233	0.210189	3.95751	0.0531114	0.957643	1
LOC108695970	5.59035	0.0448783	2.88574	0.0155517	0.987592	1
LOC108695971	2.29053	-0.576428	3.59809	-0.160204	0.87272	1
LOC108695973	2.23505	1.83572	4.14765	0.442592	0.658061	1
LOC108695974	16.8279	0.110086	0.991552	0.111024	0.911597	1
LOC108695975	6.4664	-0.4519	2.76628	-0.16336	0.870235	1
LOC108695976	7.56432	0.209214	2.13591	0.0979505	0.921972	1
LOC108695977	4.21363	0.162522	2.51696	0.0645708	0.948516	1
LOC108695978	3.36916	0.406954	3.46951	0.117294	0.906627	1
LOC108695979	6.38454	0.714478	1.72311	0.414645	0.678402	1
LOC108695980	7.48286	0.291863	3.09729	0.0942316	0.924925	1
LOC108695981	2.68468	-0.0152338	3.12029	-0.00488218	0.996105	1
LOC108695982	6.91861	-1.9488	1.47293	-1.32307	0.185811	1
LOC108695983	140.314	-1.15534	0.224638	-5.1431	2.70245e-07	8.90484e-06
LOC108695984	8.45925	-0.581453	2.02888	-0.286588	0.774428	1
LOC108695985	6.47783	-0.563071	2.8959	-0.194437	0.845833	1
LOC108695986	3.09143	0.852361	3.08326	0.276448	0.782204	1
LOC108695987	4.77483	0.581652	2.21892	0.262133	0.793219	1
LOC108695988	3.47237	-2.28083	2.4486	-0.931482	0.351604	1
LOC108695989	27.3695	-1.08985	2.08862	-0.521801	0.601809	0.904296
LOC108695990	27.9215	-1.40419	0.825969	-1.70006	0.0891201	0.365102
LOC108695991	50.4317	-0.269911	0.347112	-0.777589	0.436811	0.812468
LOC108695992	33.5737	-1.42871	0.801206	-1.7832	0.0745537	0.325718
LOC108695993	6.889	-0.32649	2.32475	-0.140441	0.888312	1
LOC108696000	24.085	-0.270412	4.08153	-0.0662527	0.947177	0.992425
LOC108696003	32.5534	1.26841	0.725967	1.7472	0.0806031	0.341972
LOC108696004	10.544	-0.140219	1.56686	-0.0894908	0.928692	1
LOC108696005	20.3586	0.143472	1.01182	0.141796	0.887242	0.980901
LOC108696007	21.958	0.163779	0.61538	0.266142	0.79013	0.961407
LOC108696008	7.68365	0.671003	1.63537	0.410307	0.681581	1
LOC108696012	248.646	-0.41063	0.219417	-1.87146	0.0612817	0.287556
LOC108696013	55.3176	0.0307519	0.35256	0.0872245	0.930493	0.989575
LOC108696014	175.943	-0.541854	0.32449	-1.66986	0.0949466	0.379497
LOC108696015	3.68167	-0.385331	2.9953	-0.128645	0.897639	1
LOC108696016	248.987	-0.967011	0.288028	-3.35734	0.000786949	0.0103247
LOC108696017	4.05276	-0.0153866	3.34955	-0.00459363	0.996335	1
LOC108696018	3.91234	-0.674759	3.87364	-0.174192	0.861714	1
LOC108696019	62.6432	-1.81013	1.56586	-1.156	0.247682	0.63874
LOC108696020	40.1343	-1.29427	0.520994	-2.48422	0.0129834	0.0963522
LOC108696022	187.357	-0.0496088	0.226184	-0.21933	0.826393	0.968997		X
LOC108696023	7.87869	0.607888	1.07219	0.566959	0.570742	1
LOC108696024	7.77826	-0.625023	1.09998	-0.56821	0.569892	1
LOC108696025	10.7965	0.334758	0.781226	0.428504	0.668285	1
LOC108696026	2.47603	-0.953145	2.81692	-0.338364	0.735089	1
LOC108696027	14.9201	0.0285325	1.90736	0.0149592	0.988065	1
LOC108696028	3.23659	-0.181624	2.71758	-0.0668329	0.946715	1
LOC108696029	18.4808	0.412305	1.54852	0.266257	0.790042	1
LOC108696031	3.46677	-0.0152854	3.45037	-0.00443007	0.996465	1
LOC108696032	4.605	0.0848288	3.58933	0.0236336	0.981145	1
LOC108696034	3.74426	-0.281567	3.35637	-0.0838902	0.933144	1
LOC108696035	11.5292	0.158172	1.52989	0.103388	0.917655	1
LOC108696036	2.11894	0.809946	3.54572	0.22843	0.819312	1
LOC108696037	14.3692	0.422747	1.75127	0.241395	0.809249	1
LOC108696038	9.52939	-0.13318	1.72536	-0.0771898	0.938473	1
LOC108696040	4.0068	0.587112	2.59398	0.226336	0.82094	1
LOC108696044	4.01023	-1.29884	2.11425	-0.614326	0.539	1
LOC108696045	117.512	0.393769	0.273444	1.44004	0.149856	0.492556
LOC108696047	5.02307	-0.73873	1.26458	-0.584172	0.559104	1
LOC108696052	3.12592	1.38514	3.42697	0.404189	0.686074	1
LOC108696053	37.2535	-0.0557498	2.08424	-0.0267482	0.978661	0.996527
LOC108696054	5.72893	0.354181	1.98882	0.178086	0.858656	1
LOC108696056	12.6189	0.766229	1.48443	0.516176	0.605731	1
LOC108696057	38.4309	-0.520648	0.442741	-1.17596	0.239609	0.628176
LOC108696061	62.0044	0.0102573	0.268956	0.0381375	0.969578	0.994939
LOC108696065	21.613	-0.247146	1.53651	-0.160849	0.872212	0.977703
LOC108696066	46.6867	-0.493971	0.514165	-0.960723	0.336691	0.732157
LOC108696067	73.1246	-0.0318654	0.287286	-0.110919	0.911681	0.986048		X
LOC108696068	1.64851	-2.60506	3.3666	-0.773797	0.439051	1
LOC108696071	124.811	-0.265575	0.321306	-0.826548	0.408493	0.790796
LOC108696073	5.09966	-1.21056	1.81071	-0.668555	0.503779	1
LOC108696074	630.553	-1.06895	0.219066	-4.87959	1.06306e-06	3.08895e-05
LOC108696075	63.743	-0.144594	0.270721	-0.534108	0.593267	0.900982
LOC108696078	1631.25	0.077261	0.268084	0.288197	0.773196	0.95774
LOC108696085	31.4248	0.375774	0.452162	0.831059	0.40594	0.789173
LOC108696087	228.268	0.157669	0.208117	0.757598	0.448691	0.820904
LOC108696088	4.15963	1.08602	1.628	0.667092	0.504714	1
LOC108696090	7.31443	-0.705974	2.00791	-0.351596	0.725141	1
LOC108696093	6.16115	0.772878	1.49265	0.517789	0.604605	1
LOC108696096	380.076	-0.080968	0.2	-0.404841	0.685595	0.932448
LOC108696099	24.537	0.209556	0.576941	0.363219	0.716441	0.940858
LOC108696100	20.2999	0.511165	1.14256	0.447388	0.654595	0.922324
LOC108696102	9.37208	1.94776	1.10926	1.75592	0.0791023	1
LOC108696103	150.632	1.62334	0.251041	6.46646	1.00328e-10	5.94378e-09
LOC108696105	1.97977	0.658252	2.75263	0.239136	0.811	1
LOC108696107	138.256	0.240322	0.283543	0.847568	0.396678	0.783896
LOC108696109	195.563	-0.00804265	0.22225	-0.0361874	0.971133	0.995199
LOC108696110	198.751	-0.228137	0.233706	-0.976169	0.328981	0.725192		X
LOC108696111	195.008	0.199224	0.215097	0.926207	0.354338	0.748131
LOC108696112	16.3825	-1.34761	1.13088	-1.19165	0.233398	1
LOC108696113	1.5863	-0.177751	2.88242	-0.0616672	0.950828	1
LOC108696114	1.26731	2.50879	3.62981	0.691164	0.489462	1
LOC108696115	3.66243	-1.41105	2.52437	-0.55897	0.576182	1
LOC108696118	113.767	0.371459	0.25444	1.45991	0.144315	0.483759
LOC108696120	70.436	-1.53492	1.05389	-1.45643	0.145274	0.48562
LOC108696123	2.14287	-2.35893	1.94068	-1.21552	0.224169	1
LOC108696132	2.16425	-0.274436	3.40331	-0.0806379	0.93573	1
LOC108696133	1.11514	-1.14686	3.05019	-0.375996	0.70692	1
LOC108696134	149.31	0.353976	0.182367	1.94101	0.0522568	0.259716
LOC108696138	207.347	-0.366925	0.209133	-1.75451	0.0793437	0.338943
LOC108696140	12.5898	0.0599511	0.833259	0.0719477	0.942644	1
LOC108696141	2.62248	0.493729	1.85212	0.266575	0.789796	1
LOC108696143	350.473	0.258524	0.278462	0.928402	0.353199	0.747888
LOC108696144	1.11651	0.509998	2.42915	0.209949	0.833707	1
LOC108696145	279.092	-0.477625	0.195194	-2.44692	0.0144084	0.103973
LOC108696147	8.10448	0.251	2.00539	0.125162	0.900395	1
LOC108696153	1.20391	-1.38109	2.59646	-0.531912	0.594787	1
LOC108696154	15.8561	0.371866	1.68555	0.220621	0.825388	1
LOC108696160	793.394	0.535821	0.264203	2.02806	0.0425537	0.227046
LOC108696161	11.2163	0.540269	1.35064	0.40001	0.689149	1
LOC108696163	109.474	-0.415096	0.260517	-1.59335	0.111081	0.416975
LOC108696164	26.4382	0.67676	0.816792	0.828558	0.407354	0.790134
LOC108696165	5.11999	0.0191468	1.29656	0.0147675	0.988218	1
LOC108696166	276.909	-0.290034	0.205941	-1.40833	0.159033	0.50913
LOC108696170	11.6569	-0.44858	1.47101	-0.304946	0.760407	1
LOC108696172	12.454	1.09546	1.64357	0.666516	0.505082	1		X
LOC108696173	92.3454	-0.635651	0.269227	-2.36102	0.0182248	0.123449
LOC108696174	106.942	0.393876	1.77926	0.22137	0.824804	0.968934
LOC108696176	32.3812	-0.254989	0.402241	-0.633921	0.526133	0.867742
LOC108696179	12.1829	-0.439987	2.25553	-0.19507	0.845338	1
LOC108696180	121.153	0.210805	0.301982	0.698071	0.485133	0.844358		X
LOC108696181	8.4352	1.47287	1.1273	1.30655	0.191366	1
LOC108696184	930.054	-0.71218	0.199742	-3.5655	0.000363166	0.00536838
LOC108696188	7.26474	0.828975	2.25077	0.368307	0.712644	1
LOC108696191	58.7566	0.602988	0.625596	0.963862	0.335115	0.730615
LOC108696193	1.64714	0.748612	3.23589	0.231346	0.817046	1
LOC108696194	151.975	-0.656512	0.302729	-2.16865	0.0301095	0.17933
LOC108696196	223.109	0.198612	0.241088	0.823818	0.410043	0.792293
LOC108696198	4.57712	0.777591	2.85924	0.271957	0.785655	1
LOC108696199	29.5825	0.849299	1.08328	0.784008	0.433036	0.80997
LOC108696200	6.21642	-0.223887	3.2686	-0.0684964	0.945391	1
LOC108696204	100.847	-0.0231513	0.25426	-0.0910536	0.92745	0.989542
LOC108696207	10.4285	0.880246	0.967609	0.909712	0.362974	1	X
LOC108696208	19.1934	-0.677437	0.571337	-1.1857	0.235739	1
LOC108696209	7.23025	-0.775638	1.65807	-0.467796	0.63993	1
LOC108696210	18.72	-0.644333	0.7938	-0.811707	0.41696	1
LOC108696211	30.5048	0.0594975	0.606304	0.0981316	0.921828	0.988467
LOC108696212	38.289	-0.872811	0.488811	-1.78558	0.0741672	0.32448
LOC108696217	16.2782	0.761765	1.19173	0.639208	0.522687	1
LOC108696218	23.8238	0.568456	1.32128	0.43023	0.667028	0.926032
LOC108696219	4.14764	-0.389142	1.87975	-0.207018	0.835996	1
LOC108696220	33.9097	-0.386557	0.585368	-0.660365	0.50902	0.85849
LOC108696223	2.51295	-0.437477	3.51986	-0.124288	0.901087	1
LOC108696228	4.52581	-1.29282	2.16748	-0.596463	0.550866	1
LOC108696235	1294.88	-0.126777	0.203997	-0.621467	0.534293	0.872729
LOC108696237	303.395	0.534371	0.248315	2.15199	0.0313985	0.184819
LOC108696238	24.815	-0.106464	1.81615	-0.0586206	0.953254	0.993068
LOC108696239	33.8786	1.56767	0.6985	2.24433	0.0248109	0.155659
LOC108696241	110.545	0.100914	0.211139	0.477953	0.632684	0.914761
LOC108696242	120.13	0.219112	0.245533	0.892392	0.372183	0.762504
LOC108696243	27.4819	0.381176	0.660644	0.576976	0.563955	0.887885
LOC108696244	50.2724	-0.981315	0.425907	-2.30406	0.0212194	0.138444
LOC108696248	14.9966	-0.0358101	1.3527	-0.026473	0.97888	1
LOC108696251	126.56	3.46882	1.6061	2.15978	0.0307898	0.182127
LOC108696252	2.63446	2.61503	2.48589	1.05195	0.292823	1
LOC108696253	411.247	0.250002	0.215814	1.15841	0.246695	0.637593
LOC108696254	103.716	0.193635	0.294184	0.658212	0.510402	0.859734
LOC108696255	5.41237	0.761486	1.61112	0.472645	0.636467	1
LOC108696259	1.68606	0.11235	3.12606	0.0359399	0.97133	1
LOC108696261	4.44272	0.831344	1.46858	0.566087	0.571335	1
LOC108696263	126.945	-0.505322	0.302112	-1.67263	0.0943999	0.37799	X
LOC108696264	78.0525	-0.90122	0.469247	-1.92057	0.0547865	0.267819
LOC108696265	2.14821	-0.5764	3.61185	-0.159586	0.873207	1
LOC108696266	2.6979	-0.888724	2.72437	-0.326213	0.744263	1
LOC108696267	11.2685	-0.648723	0.897548	-0.722772	0.46982	1
LOC108696270	19.8076	-0.363017	0.745051	-0.487237	0.62609	0.912756
LOC108696272	21.2673	-0.366692	1.32332	-0.277099	0.781704	0.959368
LOC108696273	4.39656	-0.307917	1.79721	-0.171331	0.863964	1
LOC108696274	11.4521	0.527863	3.27862	0.161002	0.872092	1
LOC108696275	4.54933	-0.44031	2.81216	-0.156574	0.875581	1
LOC108696277	10.2668	0.12653	0.983966	0.128592	0.897681	1
LOC108696279	93.9029	-0.287436	0.292286	-0.983405	0.325408	0.721574
LOC108696281	4.17013	0.522616	1.62836	0.320947	0.74825	1
LOC108696284	10.4397	0.0710866	1.37026	0.0518781	0.958626	1
LOC108696285	2.09625	-0.278065	2.54464	-0.109274	0.912985	1
LOC108696290	3.26857	0.477613	3.98119	0.119967	0.904509	1
LOC108696293	6.30078	1.39256	1.30364	1.06821	0.285426	1
LOC108696296	706.975	-5.19727	0.394111	-13.1873	1.03801e-39	7.19307e-37
LOC108696297	6.48436	0.437877	2.52295	0.173557	0.862213	1
LOC108696298	4.5508	-0.552933	2.46978	-0.223879	0.822851	1
LOC108696299	5.43528	0.229163	1.21832	0.188097	0.850801	1
LOC108696300	76.9937	0.183381	0.338357	0.541974	0.587837	0.898964
LOC108696301	3.76598	-1.43287	2.57167	-0.557177	0.577406	1
LOC108696302	2.99771	0.211207	3.46629	0.0609318	0.951414	1
LOC108696303	4.11665	-2.37043	1.96969	-1.20345	0.228801	1
LOC108696305	8.1998	0.938514	1.35337	0.693466	0.488017	1
LOC108696306	46.6071	1.94157	0.703236	2.76092	0.00576394	0.0525557
LOC108696307	2.27332	-1.14833	3.05006	-0.376494	0.706549	1
LOC108696308	2033.73	-0.42393	0.242118	-1.75092	0.0799598	0.34019
LOC108696309	134.21	-0.193609	0.21129	-0.91632	0.359499	0.751898
LOC108696310	8.29519	0.849407	1.75239	0.484714	0.627879	1
LOC108696311	39.7484	-0.0637079	1.27862	-0.0498257	0.960261	0.994712
LOC108696313	9.46563	0.21107	0.884386	0.238662	0.811367	1
LOC108696314	4.64812	-0.733422	3.24392	-0.226091	0.821131	1
LOC108696315	128.925	-0.333455	0.273436	-1.2195	0.222655	0.605541
LOC108696316	5.03826	-1.36662	2.0715	-0.659724	0.509431	1
LOC108696317	3.29448	-0.0304081	2.70566	-0.0112387	0.991033	1
LOC108696319	5.73709	0.629374	1.33065	0.472981	0.636227	1
LOC108696320	35.2351	-0.557828	0.546116	-1.02144	0.307044	0.703352
LOC108696321	42.6424	-0.154444	0.552925	-0.279321	0.779998	0.959198
LOC108696325	73.0512	-0.227586	0.366326	-0.621265	0.534425	0.872759
LOC108696327	6.6808	0.0465082	1.2503	0.0371976	0.970327	1
LOC108696328	157.319	-0.262794	0.267401	-0.98277	0.32572	0.721761
LOC108696331	64.7273	-0.32712	0.374525	-0.873425	0.382431	0.772156
LOC108696333	7.98631	0.377431	1.31606	0.286788	0.774275	1
LOC108696334	125	-0.294201	0.252783	-1.16385	0.244486	0.634388
LOC108696336	10.127	-0.282285	2.45184	-0.115132	0.908341	1
LOC108696337	23.7163	-0.2339	1.06391	-0.219849	0.825988	0.968997
LOC108696340	39.9858	0.287116	1.28487	0.223458	0.823179	0.968564
LOC108696346	2.02555	0.314696	3.61548	0.0870414	0.930639	1
LOC108696349	45.3874	-0.0275154	0.418754	-0.0657078	0.94761	0.992425
LOC108696353	2.70496	0.018914	2.01892	0.00936839	0.992525	1
LOC108696354	3.45076	0.323404	2.5263	0.128015	0.898137	1
LOC108696356	2.69452	0.678387	3.17814	0.213454	0.830973	1
LOC108696357	133.478	-0.108809	0.272298	-0.399597	0.689453	0.932907
LOC108696358	195.235	0.10205	0.240022	0.425168	0.670714	0.92707
LOC108696359	277.981	-1.50849	0.337912	-4.46415	8.03876e-06	0.000190893
LOC108696360	3.44878	0.398908	2.47658	0.161072	0.872037	1
LOC108696362	2.55529	1.00034	4.08462	0.244904	0.80653	1
LOC108696365	2.80177	1.47152	3.49056	0.421572	0.673338	1
LOC108696366	235.416	0.403932	0.23087	1.74961	0.0801863	0.340691
LOC108696368	216.456	-0.0956453	0.250392	-0.381983	0.702474	0.937457
LOC108696370	4.34481	0.0892777	1.70226	0.0524465	0.958173	1
LOC108696372	4.48183	3.83587	1.96504	1.95206	0.0509309	1
LOC108696373	1.82757	0.865412	2.17772	0.397393	0.691078	1
LOC108696374	176.887	0.334526	0.325544	1.02759	0.304143	0.700825
LOC108696377	354.645	0.549086	0.205456	2.67252	0.00752844	0.0644072
LOC108696378	2.38003	0.598997	2.46696	0.242808	0.808154	1
LOC108696379	607.218	0.624832	0.249761	2.50172	0.0123592	0.0931853		X
LOC108696380	23.1586	-0.851297	0.6974	-1.22067	0.22221	0.605085
LOC108696382	29.0156	0.364681	1.00779	0.361861	0.717456	0.940948
LOC108696383	0.976288	0.284175	2.7889	0.101895	0.91884	1
LOC108696384	18.3008	-0.125428	0.736598	-0.17028	0.86479	1
LOC108696387	3.0813	0.207436	2.23813	0.0926824	0.926156	1
LOC108696388	4.27414	-0.0755483	1.19482	-0.0632299	0.949583	1
LOC108696390	10.7116	0.371399	2.12276	0.174961	0.861111	1
LOC108696393	3.52884	0.73386	3.38015	0.217109	0.828124	1
LOC108696394	69.2164	0.29318	0.34544	0.848716	0.396039	0.783612
LOC108696396	3.95088	1.45698	2.77265	0.525481	0.599249	1
LOC108696399	53.7516	-1.38257	0.42325	-3.26657	0.00108861	0.0133912
LOC108696402	684.767	-0.129556	0.22586	-0.573613	0.56623	0.88914
LOC108696403	149.293	0.052732	0.214352	0.246006	0.805677	0.965009
LOC108696405	84.965	0.00356957	0.280484	0.0127265	0.989846	0.998355
LOC108696408	10.4268	0.741334	0.889812	0.833135	0.404768	1
LOC108696409	10.3776	0.428404	1.73316	0.247181	0.804768	1
LOC108696410	10.9035	1.16453	3.4168	0.340824	0.733236	1
LOC108696411	3.6335	-0.617929	2.56541	-0.24087	0.809656	1
LOC108696412	10.2932	0.829043	1.83091	0.452804	0.65069	1
LOC108696414	1.12361	-0.171498	2.50199	-0.0685448	0.945352	1
LOC108696416	97.2484	-1.18125	0.319668	-3.69523	0.000219691	0.00347915		X
LOC108696417	42.4924	-0.117768	0.435672	-0.270313	0.78692	0.96057
LOC108696418	46.6257	-0.112062	0.350917	-0.319339	0.749469	0.950398
LOC108696419	52.2718	-0.532127	0.459688	-1.15758	0.247034	0.637937
LOC108696420	3.57662	-2.27443	2.09765	-1.08427	0.278243	1
LOC108696422	3.05693	0.850927	3.20079	0.265849	0.790355	1
LOC108696423	21.5714	0.541678	2.33287	0.232194	NA	1
LOC108696425	412.488	0.620517	0.18813	3.29834	0.000972595	0.0122339
LOC108696426	5.00565	-0.237084	1.58384	-0.14969	0.88101	1
LOC108696429	94.4587	-1.30228	0.389068	-3.34718	0.000816367	0.0106132
LOC108696431	37.4916	-1.40619	0.524753	-2.67972	0.00736835	0.0633695
LOC108696441	22.7144	-1.02473	0.583219	-1.75703	0.0789132	0.337714
LOC108696447	457.051	0.850185	0.223593	3.80239	0.00014331	0.00239562
LOC108696448	76.0945	1.81674	0.329357	5.51602	3.4677e-08	1.35323e-06
LOC108696452	21.3128	0.17722	0.892609	0.198542	0.842621	0.972444
LOC108696457	460.92	0.508631	0.216017	2.35459	0.018543	0.125197
LOC108696458	1.77277	-3.14849	3.77954	-0.833035	0.404825	1
LOC108696459	619.964	-0.184565	0.234909	-0.785686	0.432052	0.809252
LOC108696468	1.61633	0.574174	2.89904	0.198057	0.843001	1
LOC108696471	257.601	-0.200121	0.211869	-0.944549	0.344889	0.739376
LOC108696472	650.992	0.280244	0.274544	1.02076	0.307368	0.703946
LOC108696473	4.42194	-0.481177	3.3553	-0.143408	0.885968	1
LOC108696474	14.838	0.405511	1.39215	0.291284	0.770834	1
LOC108696475	13.3428	1.11517	1.16028	0.961123	0.33649	1
LOC108696476	1.21764	3.5189	3.25783	1.08014	0.280081	1
LOC108696479	20.8682	0.0724124	2.25845	0.0320629	0.974422	0.996144
LOC108696480	1.8737	-0.482	3.54067	-0.136132	0.891717	1
LOC108696481	22.3385	1.22226	1.13261	1.07915	0.280519	0.677251
LOC108696483	9.0891	1.54082	0.958458	1.6076	0.107922	1
LOC108696484	335.767	0.158006	0.267578	0.590506	0.554851	0.882424		X
LOC108696486	35.7754	-0.36321	0.479025	-0.758227	0.448315	0.820821
LOC108696489	29.9241	-0.315157	1.57151	-0.200545	0.841055	0.971993
LOC108696492	1.75602	1.05722	3.09229	0.341888	0.732435	1
LOC108696493	2.98553	-0.314875	2.57813	-0.122133	0.902794	1
LOC108696494	5.32998	0.0861957	1.53145	0.0562838	0.955116	1
LOC108696496	2.27888	-1.62811	4.09761	-0.397331	0.691124	1
LOC108696498	1.39983	-1.75744	2.51521	-0.698725	0.484724	1
LOC108696500	24.2735	0.830513	1.10021	0.754865	0.45033	0.822011
LOC108696501	5.23482	0.770036	2.11566	0.36397	0.715881	1
LOC108696502	3.53043	0.311058	3.40706	0.0912981	0.927256	1
LOC108696503	4.20361	0.51154	1.58517	0.322704	0.746919	1
LOC108696504	6.9717	-1.44975	1.50836	-0.961146	0.336479	1
LOC108696506	37.2398	-0.0430751	0.403573	-0.106734	0.915	0.986506
LOC108696507	6.22473	0.0631309	2.55799	0.0246799	0.98031	1
LOC108696509	3.55946	0.647196	3.12254	0.207266	0.835802	1
LOC108696514	7.31834	0.421969	1.77305	0.23799	0.811888	1
LOC108696515	160.315	-1.30727	0.247713	-5.27735	1.31067e-07	4.57592e-06
LOC108696518	2.3392	2.37347	3.55108	0.668378	0.503892	1
LOC108696519	41.8591	-0.00359578	0.561087	-0.0064086	0.994887	0.999363
LOC108696520	4.54824	-0.825735	1.29055	-0.639831	0.522282	1
LOC108696523	5.14974	-1.02276	1.35283	-0.756017	0.449639	1
LOC108696525	1204.51	-0.0871499	0.310599	-0.280587	0.779027	0.959195
LOC108696526	11.5447	0.665546	3.37519	0.197188	0.84368	1
LOC108696527	9.7615	-1.50193	2.31947	-0.64753	0.517289	1
LOC108696529	182.221	0.432212	0.203697	2.12184	0.0338509	0.194333
LOC108696531	433.907	-0.130212	0.188567	-0.690533	0.489859	0.847301
LOC108696532	6.17793	-0.12864	1.84264	-0.0698128	0.944343	1
LOC108696533	5.70902	-0.706303	1.98468	-0.355877	0.721933	1
LOC108696536	1.62434	-0.619825	4.22007	-0.146875	0.88323	1
LOC108696537	21.3434	-0.378405	0.849617	-0.445384	0.656043	0.92253
LOC108696538	374.8	-0.708126	0.249201	-2.84159	0.00448892	0.0428076
LOC108696539	14.2113	0.100143	0.805389	0.124341	0.901045	1
LOC108696540	195.618	0.542545	0.287431	1.88757	0.0590838	0.28154
LOC108696542	1.95456	-0.781658	3.21985	-0.242762	0.80819	1
LOC108696548	3.06694	-1.63006	1.56221	-1.04343	0.296749	1
LOC108696549	115.574	-0.0904879	0.250495	-0.361237	0.717923	0.940948
LOC108696551	3.9449	1.07139	2.29299	0.467247	0.640323	1
LOC108696552	95.4836	-0.808571	0.264793	-3.0536	0.00226112	0.0244711
LOC108696553	1.95206	0.297569	2.17496	0.136816	0.891176	1
LOC108696554	244.847	-1.50405	0.227991	-6.59697	4.19634e-11	2.6805e-09
LOC108696555	133.392	0.594459	0.202892	2.92993	0.00339042	0.0339755
LOC108696556	19.9257	0.372496	0.953397	0.390704	0.696016	0.935054
LOC108696557	268.583	-0.191397	0.19004	-1.00714	0.313867	0.710363
LOC108696560	178.503	0.388732	0.223124	1.74222	0.0814698	0.344181
LOC108696561	475.89	-0.0557847	0.2001	-0.278785	0.78041	0.95931
LOC108696562	3.56969	-2.1757	2.15372	-1.0102	0.312398	1
LOC108696563	91.6579	-0.784973	0.285048	-2.75382	0.00589035	0.0534626
LOC108696564	3.44925	0.180568	3.38101	0.0534065	0.957408	1
LOC108696565	6.23661	-0.650049	3.19323	-0.203571	0.838689	1
LOC108696566	10.2873	-0.031422	1.47033	-0.0213707	0.98295	1
LOC108696568	12.0189	0.675899	0.945515	0.714847	0.474703	1
LOC108696570	183.163	-0.0160467	0.265474	-0.0604455	0.951801	0.993068
LOC108696573	1.92731	0.316339	3.30643	0.0956741	0.923779	1
LOC108696575	6.0045	1.10707	2.02887	0.545658	0.585301	1
LOC108696576	4.10329	-0.711589	1.97417	-0.360449	0.718511	1
LOC108696580	1.12361	-1.03111	4.09668	-0.251694	0.801278	1
LOC108696581	70.5851	-0.0359225	0.372035	-0.0965569	0.923078	0.988955
LOC108696584	14.5082	-0.246895	1.15159	-0.214395	0.830239	1
LOC108696586	6.85448	-0.295621	1.90485	-0.155194	0.876668	1
LOC108696587	34.8075	-1.14642	0.549195	-2.08745	0.0368477	0.20547
LOC108696590	28.7884	0.144513	0.672165	0.214997	0.82977	0.969088
LOC108696592	20.4432	-0.963182	0.833231	-1.15596	0.247697	0.63874
LOC108696593	53.789	0.0481299	0.41195	0.116834	0.906991	0.985487
LOC108696594	108.721	-0.0388568	0.242587	-0.160177	0.872742	0.977703
LOC108696596	2.73247	-0.789338	2.39105	-0.330122	0.741308	1
LOC108696597	1.28538	0.639479	2.67392	0.239154	0.810986	1
LOC108696606	2.7592	0.0401272	1.69809	0.0236308	0.981147	1
LOC108696608	11.4624	-0.430419	1.75919	-0.244669	0.806713	1
LOC108696610	426.263	0.364887	0.243987	1.49552	0.13478	0.464612
LOC108696613	108.298	-0.418172	0.271122	-1.54238	0.122982	0.4419
LOC108696618	154.203	0.00481203	0.228942	0.0210185	0.983231	0.997278
LOC108696619	620.6	-2.39882	0.285001	-8.41689	3.86594e-17	5.11019e-15
LOC108696620	183.757	-1.14974	0.252754	-4.54883	5.39438e-06	0.000133505
LOC108696621	1.44421	-0.590085	3.61787	-0.163103	0.870438	1
LOC108696623	162.18	-0.0569428	0.2482	-0.229423	0.81854	0.968348
LOC108696628	37.0079	1.60041	0.373367	4.28642	1.81572e-05	0.000397939
LOC108696629	295.2	1.64893	0.223684	7.37169	1.68483e-13	1.49917e-11
LOC108696630	3.72967	0.313324	2.80047	0.111882	0.910917	1
LOC108696632	1.04446	0.780823	3.17057	0.246272	0.805472	1
LOC108696633	1.76139	3.33204	3.25292	1.02432	0.305682	1
LOC108696634	2.23459	-0.425808	2.34353	-0.181695	0.855822	1
LOC108696636	186.555	0.397747	0.184304	2.1581	0.0309199	0.182566
LOC108696637	2.9644	0.318134	3.28505	0.096843	0.922851	1
LOC108696639	16.23	-0.0128996	0.767153	-0.0168148	0.986584	1
LOC108696640	5.5359	1.25308	1.96246	0.638528	0.52313	1
LOC108696641	0.957067	-0.881462	3.0358	-0.290356	0.771544	1
LOC108696642	6.60806	0.244511	2.54119	0.0962191	0.923347	1
LOC108696643	3.67158	1.10116	2.96391	0.371522	0.710249	1
LOC108696645	10.4537	0.374276	0.943982	0.396487	0.691746	1
LOC108696650	13.0927	-0.200969	1.7629	-0.113999	0.909239	1
LOC108696652	6.7903	0.936036	1.86108	0.502954	0.614997	1
LOC108696656	577.971	0.207443	0.25989	0.798194	0.424758	0.803754
LOC108696658	8.73576	0.568568	2.50454	0.227014	0.820413	1
LOC108696659	19.6941	0.237474	0.653796	0.363224	0.716438	1
LOC108696660	13.1602	1.4495	0.830288	1.74578	0.0808498	1
LOC108696663	8.34359	-0.488234	1.43997	-0.339059	0.734565	1
LOC108696666	10.1134	0.0333171	1.44549	0.023049	0.981611	1
LOC108696667	78.8859	0.298788	0.58387	0.511738	0.608835	0.906751
LOC108696671	1.93134	0.748398	3.24717	0.230477	0.817721	1
LOC108696673	76.1074	-0.240245	0.267318	-0.898725	0.368799	0.760543
LOC108696675	2.59088	0.576751	4.01617	0.143607	0.885811	1
LOC108696676	11.5382	0.746928	1.81274	0.412043	0.680308	1
LOC108696677	21.5775	-0.464283	0.954554	-0.486388	0.626692	0.912862
LOC108696678	1.5019	1.34246	4.19781	0.319801	0.749119	1
LOC108696681	3.22505	0.26475	1.98659	0.133268	0.893981	1
LOC108696683	78.0099	0.149372	0.28965	0.5157	0.606064	0.905705
LOC108696684	16.0024	1.06148	2.56699	0.413511	0.679233	1		X
LOC108696685	5.63336	-0.506619	2.32929	-0.2175	0.827819	1
LOC108696689	184.374	0.938821	0.236347	3.97222	7.1207e-05	0.00130061
LOC108696690	7.80153	1.15272	1.87791	0.613831	0.539327	1
LOC108696692	5.1896	-0.0307508	2.18146	-0.0140964	0.988753	1
LOC108696693	2.86982	0.636168	2.01048	0.316426	0.751679	1
LOC108696695	90.3213	-0.638349	0.299673	-2.13015	0.033159	0.192212
LOC108696697	22.7354	-2.53066	0.830424	-3.04743	0.00230811	0.0248971
LOC108696698	5.43443	-0.804238	1.21158	-0.663795	0.506822	1
LOC108696702	7.36332	-0.161565	1.35211	-0.119491	0.904887	1
LOC108696704	13.489	0.481624	0.986609	0.488161	0.625436	1
LOC108696706	1.64752	-0.440369	4.17789	-0.105405	0.916055	1
LOC108696707	5.97376	-0.123788	2.789	-0.0443845	0.964598	1
LOC108696708	3.50031	0.886821	3.87899	0.228622	0.819163	1
LOC108696709	370.369	1.17703	0.196884	5.97829	2.2549e-09	1.06101e-07
LOC108696710	7.1162	-0.0489494	2.4311	-0.0201346	0.983936	1
LOC108696711	2.42214	-0.177328	3.08907	-0.0574051	0.954223	1
LOC108696712	10.8036	0.53151	2.36032	0.225186	0.821835	1
LOC108696713	247.624	-1.4422	0.184779	-7.80501	5.9498e-15	6.29908e-13
LOC108696714	6.38493	1.77532	1.04771	1.69448	0.0901747	1
LOC108696715	12.9355	0.195712	1.02755	0.190466	0.848944	1
LOC108696716	5.12498	0.677695	2.29886	0.294797	0.768149	1
LOC108696717	12.0079	-0.229661	1.81014	-0.126875	0.899039	1
LOC108696718	3.80855	1.30916	2.4813	0.527612	0.597768	1
LOC108696719	8.85764	-1.50977	1.45295	-1.03911	0.298755	1
LOC108696724	5.13612	-0.0150947	2.62417	-0.0057522	0.99541	1
LOC108696725	135.264	-0.280744	0.196535	-1.42846	0.153159	0.498692
LOC108696729	54.6219	0.670033	0.391255	1.71252	0.0868006	0.358619		X
LOC108696730	56.4238	-0.473496	0.30559	-1.54944	0.121275	0.43833
LOC108696731	1.65993	-0.768413	4.16956	-0.184291	0.853785	1
LOC108696734	4.16133	1.74587	2.70381	0.64571	0.518467	1
LOC108696736	8.69291	0.0947095	1.47378	0.0642629	0.948761	1
LOC108696737	3.79212	1.65067	1.86774	0.883781	0.376814	1
LOC108696741	80.3726	-0.0605289	0.259556	-0.233202	0.815605	0.968048
LOC108696742	38.6935	-0.955268	0.44738	-2.13525	0.0327404	0.190479
LOC108696743	90.559	0.438437	0.262818	1.66822	0.0952726	0.380226
LOC108696744	36.7945	-0.0962681	0.387961	-0.248139	0.804027	0.964146
LOC108696748	13.2067	0.477329	1.42372	0.335269	0.737422	1
LOC108696749	7.58283	-0.160972	3.04267	-0.052905	0.957808	1
LOC108696750	3.96177	-0.0185521	2.15047	-0.00862697	0.993117	1
LOC108696751	2.53844	-0.6144	3.51919	-0.174586	0.861405	1
LOC108696752	23.4165	0.321389	0.847765	0.379102	0.704612	0.937918
LOC108696753	5.32691	0.10222	2.66776	0.0383166	0.969435	1
LOC108696757	15.301	-0.346089	1.22369	-0.282825	0.777311	1
LOC108696758	215.049	-0.191783	0.189733	-1.0108	0.31211	0.708688
LOC108696759	4.99167	2.3206	1.8973	1.22311	0.22129	1
LOC108696761	9.21166	0.542447	2.03785	0.266186	0.790096	1
LOC108696763	73.3848	0.498379	0.438436	1.13672	0.255656	0.649521
LOC108696765	212.244	-0.00152725	0.224487	-0.00680328	0.994572	0.999363
LOC108696767	1.6877	1.54317	2.56971	0.600525	0.548156	1
LOC108696768	3.28236	0.211288	3.43566	0.0614985	0.950962	1
LOC108696771	143.525	-0.916702	0.231279	-3.96362	7.38207e-05	0.00134513
LOC108696772	7.0775	-1.00342	1.50544	-0.666531	0.505072	1
LOC108696775	48.4132	-0.572181	0.437258	-1.30857	0.190682	0.557752
LOC108696776	163.636	0.764301	0.262948	2.90666	0.00365311	0.0361329
LOC108696777	201.723	-0.337782	0.211837	-1.59454	0.110816	0.416136
LOC108696778	267.106	0.99029	0.222533	4.45009	8.58346e-06	0.000202566
LOC108696780	27.0546	0.148281	3.23286	0.0458669	0.963416	0.99475
LOC108696781	114.165	1.3525	0.337377	4.00886	6.10117e-05	0.00113156
LOC108696783	44.1181	0.254241	0.650917	0.390589	0.696101	0.93507	X
LOC108696784	152.442	-0.268995	0.282122	-0.953472	0.340351	0.734939
LOC108696785	11.6059	-0.848456	1.63663	-0.518417	0.604167	1
LOC108696786	1.39913	-0.0149676	3.68906	-0.0040573	0.996763	1
LOC108696787	765.639	0.120913	0.198028	0.610587	0.541473	0.876389
LOC108696788	23.8982	-0.271795	0.489993	-0.554692	0.579106	0.894872
LOC108696791	1.34273	-2.54753	3.64328	-0.699242	0.484401	1
LOC108696793	5.90972	-1.24354	1.96893	-0.631585	0.527658	1
LOC108696794	8.8364	-0.747497	1.53617	-0.486599	0.626542	1
LOC108696797	5.84637	-0.205184	1.54593	-0.132726	0.89441	1
LOC108696798	37.3585	-0.334371	0.548489	-0.609622	0.542113	0.876632	X
LOC108696800	301.987	-0.685851	0.233575	-2.93633	0.00332126	0.0333702	X
LOC108696801	4.17746	0.455027	2.3414	0.19434	0.84591	1
LOC108696802	18.958	-0.515139	1.03924	-0.495688	0.620114	1
LOC108696803	6.69239	-3.03691	1.72659	-1.75891	0.0785936	1
LOC108696804	47.3059	-1.49345	0.432586	-3.45238	0.000555671	0.00775296
LOC108696805	254.13	0.208369	0.233297	0.893146	0.371779	0.762395
LOC108696808	1.8442	-0.926356	2.60998	-0.354929	0.722643	1
LOC108696809	5.13032	0.461837	2.77	0.166728	0.867584	1
LOC108696811	18.6131	0.249057	1.18255	0.210611	0.833191	1
LOC108696814	6.48109	0.720322	3.10734	0.231813	0.816683	1
LOC108696815	4.64391	1.22052	2.14103	0.570064	0.568634	1
LOC108696816	3.57661	0.21346	2.81897	0.0757229	0.93964	1
LOC108696817	8.58654	-0.411112	2.10252	-0.195533	0.844976	1
LOC108696818	4.68752	0.272929	2.58972	0.105389	0.916067	1
LOC108696820	8.36178	0.415632	1.73293	0.239843	0.810452	1
LOC108696821	3.24539	0.58067	3.9794	0.145919	0.883985	1
LOC108696822	6.43267	0.292048	3.1687	0.0921667	0.926566	1
LOC108696823	3.12067	-1.80685	2.51407	-0.718695	0.472329	1
LOC108696824	889.755	-0.826969	0.213451	-3.87429	0.000106937	0.0018484
LOC108696825	4.26553	1.24422	1.66482	0.747361	0.454846	1
LOC108696829	6.45915	0.138696	2.76828	0.050102	0.960041	1
LOC108696830	8.47069	0.786432	1.1043	0.712154	0.476369	1
LOC108696831	4.64714	-0.606525	3.77491	-0.160673	0.872351	1
LOC108696832	15.8043	0.0962457	0.916194	0.10505	0.916337	1
LOC108696834	155.399	0.0406026	0.329947	0.123058	0.902061	0.983782
LOC108696836	353.957	-0.11357	0.360767	-0.3148	0.752913	0.951419
LOC108696837	27.158	-1.92461	1.76005	-1.09349	0.274177	0.670575
LOC108696839	203.268	-0.144777	0.229494	-0.630851	0.528138	0.868695
LOC108696841	87.8201	-0.700466	0.498636	-1.40476	0.160091	0.510738
LOC108696842	10.1337	0.0897007	2.14025	0.0419113	0.966569	1
LOC108696843	43.6104	-0.906745	0.814332	-1.11348	0.265501	0.661206	X
LOC108696844	364.555	-0.54187	0.170814	-3.17228	0.00151245	0.0175453
LOC108696845	15.436	-0.358846	1.22832	-0.292143	0.770177	1
LOC108696846	40.4869	-0.0364293	0.473525	-0.0769321	0.938678	0.991764
LOC108696848	423.259	0.0177062	0.185555	0.0954232	0.923979	0.988955
LOC108696849	4.19842	0.148465	1.76231	0.0842441	0.932862	1
LOC108696851	16.1895	0.398609	2.88355	0.138236	0.890054	1
LOC108696852	117.085	0.562001	0.251386	2.23561	0.0253775	0.158344
LOC108696855	9.6559	-0.379395	2.36777	-0.160233	0.872697	1
LOC108696856	81.2169	0.0381486	0.330516	0.115421	0.908111	0.985803
LOC108696860	1.77116	-1.54159	2.56358	-0.601342	0.547612	1
LOC108696862	78.3883	0.571855	0.424281	1.34782	0.177716	0.539709
LOC108696863	665.033	0.270961	0.204919	1.32228	0.186073	0.552614
LOC108696864	36.2289	-0.0563195	0.687383	-0.0819333	0.9347	0.990579
LOC108696865	11.7478	0.0646757	1.18566	0.0545485	0.956498	1
LOC108696870	3.3058	-0.21044	3.97098	-0.0529944	0.957736	1
LOC108696873	811.576	-0.314943	0.286459	-1.09943	0.271578	0.667916
LOC108696874	4.38794	1.19287	3.2858	0.363037	0.716577	1
LOC108696875	4.17376	1.19241	3.33378	0.357676	0.720586	1
LOC108696876	5.6567	-0.620499	2.81417	-0.220491	0.825489	1
LOC108696879	11.148	-0.478452	1.76569	-0.270972	0.786412	1
LOC108696880	339.921	0.273225	0.195096	1.40047	0.161374	0.512918		X
LOC108696881	12.3232	0.310111	1.21006	0.256279	0.797736	1
LOC108696882	23.9395	0.497522	0.865362	0.574929	0.565339	0.888427
LOC108696883	7.07267	0.116239	2.48937	0.046694	0.962757	1
LOC108696884	7.61472	0.0295523	1.25556	0.0235371	0.981222	1
LOC108696885	55.5785	0.187096	1.72695	0.108339	0.913727	0.986451
LOC108696886	15.2971	0.34217	2.86315	0.119508	0.904873	1
LOC108696887	2.24911	0.579797	4.14084	0.140019	0.888645	1
LOC108696888	59.0097	0.52691	1.85583	0.283922	0.77647	0.958609
LOC108696889	322.461	-0.076943	0.724451	-0.106209	0.915417	0.986689
LOC108696890	128.807	0.374055	0.77468	0.482851	0.629201	0.913763
LOC108696891	19.6152	0.133802	3.08417	0.0433834	0.965396	1
LOC108696892	127.361	0.0872271	0.198639	0.439124	0.660572	0.923648
LOC108696893	19.9907	0.0603946	2.44382	0.0247132	0.980284	0.996791
LOC108696894	2.41996	-0.12421	3.12615	-0.0397325	0.968306	1
LOC108696895	246.124	0.0994648	0.248975	0.399497	0.689527	0.932907
LOC108696896	13.0603	1.01672	1.92903	0.527065	0.598149	1
LOC108696897	9.74573	0.0740206	4.09509	0.0180755	0.985579	1
LOC108696898	3.78337	-0.213754	2.43355	-0.0878364	0.930007	1
LOC108696899	5.92365	-1.26078	1.83614	-0.686651	0.492303	1
LOC108696900	1.30405	-0.537462	3.64374	-0.147503	0.882735	1
LOC108696902	2.37457	-1.01039	3.505	-0.288271	0.773139	1
LOC108696903	6.41319	0.257714	2.25859	0.114104	0.909155	1
LOC108696904	2.0558	1.05015	2.84007	0.369762	0.71156	1
LOC108696905	1.81362	-0.0150659	3.29398	-0.00457376	0.996351	1
LOC108696906	12.2323	0.10812	0.749315	0.144292	0.88527	1
LOC108696907	1.90303	1.27062	2.20885	0.57524	0.565129	1
LOC108696908	4.77393	-0.424865	1.67394	-0.253811	0.799641	1
LOC108696910	8.47113	0.224619	0.984252	0.228213	0.81948	1
LOC108696911	14.3661	-2.40737	1.01126	-2.38057	0.0172857	1
LOC108696913	119.955	-1.02535	0.239228	-4.28609	1.81849e-05	0.000397945
LOC108696914	4.27669	-1.10228	1.76448	-0.624708	0.532162	1
LOC108696916	13.8617	-0.300893	1.14064	-0.263792	0.79194	1
LOC108696917	6.40433	-1.09478	1.83027	-0.598151	0.549739	1
LOC108696918	1.51596	-0.0153454	4.16386	-0.00368537	0.99706	1
LOC108696919	18.2894	1.60286	1.32267	1.21184	0.225574	1
LOC108696920	2.5265	-3.38701	2.74629	-1.23331	0.217462	1
LOC108696921	3.90575	0.643901	3.87504	0.166166	0.868026	1
LOC108696923	3.12954	-0.508287	4.00395	-0.126946	0.898983	1
LOC108696924	2.15402	-0.347507	3.18868	-0.108981	0.913217	1
LOC108696925	4.21826	-0.0153997	3.32831	-0.00462688	0.996308	1
LOC108696926	3.43309	-1.62811	3.54835	-0.458834	0.646353	1
LOC108696930	9.44885	-0.0487998	1.80653	-0.027013	0.978449	1
LOC108696931	4.63163	0.512646	2.26441	0.226393	0.820896	1
LOC108696932	1.51033	-2.62029	3.05642	-0.857307	0.391275	1
LOC108696933	1.70696	-0.01517	3.65592	-0.00414944	0.996689	1
LOC108696934	4.5197	0.607323	3.2597	0.186312	0.8522	1
LOC108696935	5.51539	0.145609	2.89493	0.0502979	0.959885	1
LOC108696936	31.7894	0.672808	0.515874	1.30421	0.192162	0.560843
LOC108696940	109.564	0.165346	0.254546	0.649573	0.515968	0.862385
LOC108696941	2.13728	0.144492	2.17298	0.066495	0.946984	1
LOC108696942	14.0831	0.622728	1.44461	0.431071	0.666417	1
LOC108696943	4.00952	0.42487	1.56607	0.271298	0.786162	1
LOC108696944	203.414	0.672992	0.245119	2.74557	0.00604065	0.0544278
LOC108696945	2069.14	-0.781439	0.206089	-3.79176	0.000149581	0.00249497
LOC108696946	3.66494	1.5731	3.41594	0.460516	0.645146	1
LOC108696947	62.8035	0.435817	0.296361	1.47056	0.14141	0.478184
LOC108696948	19.2679	0.0086966	0.850247	0.0102283	0.991839	1
LOC108696949	4.35678	1.23597	2.4654	0.501326	0.616142	1
LOC108696950	3.98425	-0.328894	2.84985	-0.115407	0.908122	1
LOC108696952	4.61576	1.42159	1.76354	0.806096	0.420188	1
LOC108696953	6.33478	-0.962693	3.06373	-0.314222	0.753352	1
LOC108696954	1.87432	-0.197917	3.60671	-0.0548745	0.956238	1
LOC108696957	2.01727	2.27873	2.72818	0.835257	0.403573	1
LOC108696958	5.97094	0.302974	1.39404	0.217336	0.827947	1
LOC108696959	4.56752	0.933801	1.34119	0.69625	0.486272	1
LOC108696961	162.448	0.143146	1.25671	0.113905	NA	1
LOC108696963	9.92196	0.646703	2.26843	0.285089	0.775576	1
LOC108696964	6.04282	0.0543621	2.84029	0.0191397	0.98473	1
LOC108696965	2.98499	0.827392	2.69324	0.30721	0.758683	1
LOC108696966	2.1225	-0.835883	4.13597	-0.202101	0.839838	1
LOC108696968	1.49608	-2.88493	4.26261	-0.6768	0.498533	1
LOC108696969	2.05091	-0.668939	3.169	-0.211089	0.832818	1
LOC108696972	2.43564	0.314499	3.65718	0.0859948	0.931471	1
LOC108696973	11.1761	-0.0851282	1.80297	-0.0472154	0.962342	1
LOC108696974	7.38282	0.618672	2.23807	0.276431	0.782217	1
LOC108696975	4.27269	0.140709	2.89738	0.0485642	0.961267	1
LOC108696979	2.43542	-0.107536	2.41717	-0.0444886	0.964515	1
LOC108696981	1.65828	-0.01534	4.16386	-0.00368409	0.997061	1
LOC108696982	4.13515	-0.906925	2.51679	-0.36035	0.718585	1
LOC108696983	4.11817	1.11593	3.44972	0.323483	0.74633	1
LOC108696984	3.10542	-0.383468	3.47711	-0.110284	0.912185	1
LOC108696985	3.77857	-0.878625	3.05582	-0.287525	0.77371	1
LOC108696986	6.83868	-0.0683465	1.37603	-0.0496695	0.960386	1
LOC108696988	2.24175	1.22605	2.9853	0.410695	0.681296	1
LOC108696990	2.08361	0.737757	4.1695	0.176941	0.859555	1
LOC108696991	4.19385	-0.244125	2.70801	-0.090149	0.928169	1
LOC108696992	50.7074	-2.40228	0.465152	-5.1645	2.4108e-07	8.00146e-06
LOC108696993	3.98456	-2.20011	2.05283	-1.07175	0.283835	1
LOC108696994	2.50866	1.26698	3.51404	0.360549	0.718436	1
LOC108696996	8.14024	0.0394215	0.932225	0.0422876	0.966269	1
LOC108697000	33.6791	3.37287	1.58514	2.12781	0.033353	0.192508
LOC108697001	6.70335	0.16679	3.15728	0.0528273	0.957869	1
LOC108697002	4.79916	0.280931	2.71672	0.103408	0.917639	1
LOC108697003	3.51987	-0.14778	2.46032	-0.0600654	0.952104	1
LOC108697004	5.07066	0.408204	2.62546	0.155479	0.876444	1
LOC108697005	3.29561	0.814376	3.18134	0.255985	0.797963	1
LOC108697006	3.17035	0.171666	2.51585	0.068234	0.945599	1
LOC108697007	2.11755	0.805126	4.13392	0.194761	0.84558	1
LOC108697008	29.5084	1.15872	3.08599	0.375478	NA	1
LOC108697009	61.627	-1.17332	0.328871	-3.56771	0.000360108	0.00533698
LOC108697011	1.708	2.3014	3.57816	0.643179	0.520108	1
LOC108697013	13.9728	-0.633047	1.76861	-0.357935	0.720392	1
LOC108697014	5.54807	-0.0752625	1.94899	-0.0386162	0.969196	1
LOC108697017	17.4987	0.546849	2.44658	0.223516	0.823134	1
LOC108697019	1.70531	1.02413	3.65935	0.279867	0.779579	1
LOC108697022	175.627	0.196126	0.281635	0.696384	0.486188	0.84478
LOC108697024	2.21491	1.35663	3.55833	0.381255	0.703014	1
LOC108697025	34.2736	-1.08018	0.727908	-1.48395	0.137823	0.47062
LOC108697026	3.37173	-0.905892	3.14548	-0.287998	0.773348	1
LOC108697028	2.36275	-0.534664	2.15713	-0.247859	0.804243	1
LOC108697030	4.72228	-0.956298	2.15065	-0.444655	0.656569	1
LOC108697031	14.4453	0.659772	2.07096	0.318583	0.750043	1
LOC108697032	2.86451	0.848167	3.46831	0.244548	0.806807	1
LOC108697034	3.57228	0.0647293	2.55819	0.0253027	0.979813	1
LOC108697035	3.91234	-0.674759	3.87364	-0.174192	0.861714	1
LOC108697036	5.32765	1.6549	3.34828	0.494253	0.621128	1
LOC108697037	4.01738	0.42036	3.0156	0.139395	0.889138	1
LOC108697040	20.925	0.302112	3.31429	0.0911546	NA	1
LOC108697041	6.0851	0.569811	2.7281	0.208868	0.834552	1
LOC108697042	5.99227	-0.0836978	2.81665	-0.0297154	0.976294	1
LOC108697043	1.49278	-0.0152667	4.19184	-0.00364199	0.997094	1
LOC108697044	1.99197	-1.26672	3.71236	-0.341217	0.73294	1
LOC108697045	3.00822	-1.21585	3.08613	-0.393971	0.693602	1
LOC108697046	5.72945	0.371195	2.35669	0.157507	0.874845	1
LOC108697047	50.8058	0.153649	0.358733	0.428311	0.668425	0.926567
LOC108697048	1.69912	-1.06542	3.22677	-0.330181	0.741263	1
LOC108697049	4.81403	-0.552623	3.27044	-0.168975	0.865816	1
LOC108697051	5.57746	0.69299	1.8821	0.3682	0.712724	1
LOC108697052	2.27229	0.477117	4.11036	0.116077	0.907592	1
LOC108697053	2.53541	-0.0153673	4.1036	-0.00374484	0.997012	1
LOC108697054	1.43308	0.412969	3.64926	0.113165	0.909899	1
LOC108697055	4.18819	-0.913027	2.63033	-0.347115	0.728505	1
LOC108697056	4.57075	-1.31427	1.41169	-0.930992	0.351858	1
LOC108697058	4.47164	1.10009	2.51173	0.437979	0.661401	1
LOC108697059	5.56249	-0.0463164	2.29897	-0.0201466	0.983926	1
LOC108697060	16.8866	0.281354	0.822884	0.341912	0.732417	1
LOC108697061	5.79114	-1.19995	3.15566	-0.380254	0.703757	1
LOC108697062	1.28012	2.80043	3.21287	0.871629	0.383411	1
LOC108697063	1.35219	-0.626476	3.63914	-0.172149	0.86332	1
LOC108697064	4.8215	0.111614	3.26883	0.034145	0.972762	1
LOC108697066	7.34147	0.349852	3.48654	0.100344	0.920072	1
LOC108697067	4.04061	-0.187298	3.86281	-0.0484874	0.961328	1
LOC108697068	4.26215	0.15452	1.79401	0.0861313	0.931362	1
LOC108697069	6.0365	0.253259	1.91589	0.132189	0.894835	1
LOC108697071	2.09273	1.83531	4.16688	0.440452	0.65961	1
LOC108697083	1.12647	-3.59417	2.53329	-1.41878	0.155964	1
LOC108697094	4.14242	-0.34492	2.46426	-0.139969	0.888685	1
LOC108697098	5.65087	0.605456	2.337	0.259074	0.795578	1
LOC108697100	9.40157	-0.332548	0.854555	-0.389148	0.697167	1
LOC108697101	1.93131	-0.862765	2.7712	-0.311332	0.755548	1
LOC108697102	1.50355	0.409782	4.17785	0.0980844	0.921865	1
LOC108697106	4.0849	-0.0405393	2.67859	-0.0151346	0.987925	1
LOC108697107	5.92447	-0.891541	1.61158	-0.553209	0.58012	1
LOC108697109	11.0398	1.63952	1.56447	1.04797	0.294653	1	X
LOC108697110	1.67981	0.579945	4.10708	0.141206	0.887707	1
LOC108697111	2.59161	-1.65232	2.68188	-0.616107	0.537824	1
LOC108697112	96.3553	-7.02376	0.608838	-11.5363	8.65282e-31	3.59768e-28
LOC108697113	3.56783	-0.253998	2.1711	-0.11699	0.906868	1
LOC108697114	1.56249	-2.90794	4.21984	-0.68911	0.490754	1
LOC108697119	2.72574	-0.435798	4.04523	-0.107731	0.914209	1
LOC108697120	3.14942	0.405101	3.99693	0.101353	0.91927	1
LOC108697122	1.99939	-0.467357	2.84935	-0.164022	0.869714	1
LOC108697123	4.46521	-0.593371	2.40301	-0.246929	0.804964	1
LOC108697125	1.42038	-3.30043	3.20295	-1.03043	0.302807	1
LOC108697127	518.683	-0.524467	0.212566	-2.46731	0.0136132	0.0995541
LOC108697129	13.4601	-0.17697	0.871813	-0.20299	0.839143	1
LOC108697132	288.292	-0.535397	0.164037	-3.26389	0.00109896	0.0134534
LOC108697133	28.0144	-0.315578	0.91614	-0.344465	0.730497	0.944328
LOC108697135	91.8218	0.497697	0.228949	2.17383	0.0297177	0.177809
LOC108697138	2.38232	-0.343432	4.1293	-0.0831694	0.933717	1
LOC108697140	2.30213	0.252759	3.72053	0.0679362	0.945836	1
LOC108697141	17.6676	-0.68195	1.40648	-0.484862	0.627774	1
LOC108697142	101.792	-0.539179	0.234006	-2.30413	0.0212155	0.138444
LOC108697143	153.987	-0.0847454	0.236299	-0.358636	0.719867	0.941327
LOC108697144	8.74763	-0.506612	1.53201	-0.330685	0.740883	1
LOC108697146	6.52263	-0.581784	2.83636	-0.205116	0.837481	1
LOC108697147	23.4141	-0.265899	2.33207	-0.114018	NA	1
LOC108697149	2.29001	-0.345679	3.52527	-0.0980574	0.921887	1
LOC108697150	1.59693	1.01166	3.60726	0.28045	0.779132	1
LOC108697151	4.41117	-0.677138	3.35597	-0.201771	0.840096	1
LOC108697152	6.88063	0.402852	2.61291	0.154177	0.87747	1
LOC108697154	6.53249	-1.70994	1.74699	-0.978793	0.327682	1
LOC108697157	1.42231	-0.015177	3.66695	-0.00413885	0.996698	1
LOC108697158	1.55526	-0.626959	3.60539	-0.173895	0.861948	1
LOC108697162	1.82214	0.579739	4.14991	0.139699	0.888898	1
LOC108697164	1.50849	-3.15198	4.23888	-0.743588	0.457126	1
LOC108697165	6.5825	-1.13712	1.86042	-0.61122	0.541054	1
LOC108697168	1.80808	1.83485	4.18837	0.438083	0.661326	1
LOC108697170	2.4102	-0.450279	3.03575	-0.148326	0.882086	1
LOC108697172	233.761	0.139627	0.162988	0.856674	0.391625	0.780053
LOC108697173	14.8983	0.585741	0.778474	0.752423	0.451797	1
LOC108697174	226.2	0.117596	0.22149	0.53093	0.595467	0.901817
LOC108697177	7.4628	-1.16938	1.69851	-0.688477	0.491152	1
LOC108697178	4.09278	0.799611	3.81916	0.209368	0.834161	1
LOC108697179	18.1859	0.389702	0.777247	0.501388	0.616098	1
LOC108697180	105.941	-0.348065	0.247222	-1.4079	0.15916	0.50913
LOC108697181	2.53376	0.579995	4.10254	0.141375	0.887574	1
LOC108697182	1.71375	1.27673	2.53802	0.503043	0.614934	1
LOC108697183	1.72043	-1.60081	2.57192	-0.622419	0.533666	1
LOC108697186	276.544	-0.253837	0.204778	-1.23957	0.215134	0.595749
LOC108697189	4.30901	0.244489	2.15333	0.11354	0.909603	1
LOC108697190	6.426	1.54288	1.38711	1.1123	0.266008	1
LOC108697191	15.0637	0.0972117	1.57367	0.061774	0.950743	1
LOC108697194	1.73891	-0.0149948	3.06756	-0.0048882	0.9961	1
LOC108697195	9.26282	-0.357755	2.35644	-0.15182	0.879329	1
LOC108697196	49.3482	0.198643	0.531731	0.373578	0.708718	0.938318
LOC108697197	8.1703	-0.0739056	1.27127	-0.0581352	0.953641	1
LOC108697198	4.55798	-0.207389	2.73732	-0.0757637	0.939607	1
LOC108697200	2.31602	3.70291	3.58767	1.03212	0.302015	1
LOC108697201	1.48037	0.589441	4.21999	0.139678	0.888914	1
LOC108697203	4.00655	-1.21768	2.62126	-0.464542	0.64226	1
LOC108697204	2.70182	0.0566419	2.83966	0.0199467	0.984086	1
LOC108697205	11.0386	0.199722	2.2825	0.0875016	0.930273	1
LOC108697206	2.82889	0.0252746	2.22391	0.0113649	0.990932	1
LOC108697207	7.75975	0.86003	1.56207	0.550569	0.581929	1
LOC108697208	13.2326	0.22243	1.04494	0.212864	0.831433	1
LOC108697209	2.04097	0.479565	3.55606	0.134858	0.892724	1
LOC108697211	210.093	0.013757	0.236315	0.0582148	0.953578	0.993068
LOC108697212	151.202	-0.033496	0.261198	-0.12824	0.897959	0.982733	X
LOC108697213	364.037	0.089482	0.158418	0.564847	0.572178	0.891684
LOC108697214	9.39576	0.159695	1.14925	0.138955	0.889485	1
LOC108697215	10.6768	-2.68466	1.23705	-2.17021	0.0299911	1
LOC108697216	26.682	-0.890394	0.65975	-1.34959	0.177147	0.538799
LOC108697217	264.501	0.559512	0.187171	2.98931	0.00279612	0.0290512
LOC108697219	18.1697	0.0173699	1.22442	0.0141863	0.988681	1
LOC108697220	7.95002	0.231248	2.73179	0.0846508	0.932539	1
LOC108697221	5.57356	-0.86854	2.28761	-0.379672	0.704189	1
LOC108697222	32.431	0.199062	0.494475	0.402573	0.687263	0.932548
LOC108697223	8.72352	-0.0526334	1.1716	-0.0449243	0.964168	1
LOC108697224	108.883	0.528669	0.286966	1.84227	0.0654356	0.299576
LOC108697226	46.407	0.0947543	0.346666	0.27333	0.784599	0.960054
LOC108697227	48.4386	-1.11189	0.387116	-2.87226	0.00407553	0.0395919		X
LOC108697228	27.1228	-0.265191	1.99831	-0.132708	0.894424	0.982427
LOC108697229	105.443	-0.411108	0.238052	-1.72697	0.0841733	0.351539
LOC108697231	7.36201	0.533464	2.40269	0.222028	0.824292	1
LOC108697232	14.0555	0.0609906	1.41198	0.0431951	0.965546	1
LOC108697233	30.5219	-1.40094	1.9563	-0.716118	0.473919	0.837492
LOC108697234	5.76714	-0.727339	2.95666	-0.246	0.805682	1
LOC108697235	17.1275	-0.723809	1.65157	-0.438254	0.661202	1
LOC108697237	1.92279	-1.05585	3.59098	-0.29403	0.768735	1
LOC108697238	18.1795	0.446106	1.68675	0.264477	0.791412	1
LOC108697239	7.81706	-0.22204	2.65147	-0.083742	0.933262	1
LOC108697240	12.0541	-0.192582	1.64636	-0.116975	0.90688	1
LOC108697241	4.56038	-0.257095	2.11893	-0.121332	0.903428	1
LOC108697242	2.80901	-0.514687	2.92684	-0.175851	0.860411	1
LOC108697244	263.353	-0.0530049	0.220702	-0.240165	0.810203	0.96587		X
LOC108697246	23.7941	0.0843744	2.82783	0.0298372	0.976197	0.996144
LOC108697247	9.08256	-0.141546	3.96342	-0.035713	0.971511	1
LOC108697248	5.64716	1.01914	2.06984	0.492375	0.622455	1
LOC108697250	190.493	-0.868353	0.268667	-3.23207	0.00122895	0.0147836
LOC108697251	4.0276	1.49074	3.34307	0.445919	0.655655	1
LOC108697252	1.92378	-0.222105	3.02202	-0.0734955	0.941412	1
LOC108697253	4.55503	0.486088	2.451	0.198322	0.842793	1
LOC108697255	1.957	-1.03552	4.16403	-0.248683	0.803606	1
LOC108697256	3.63846	-0.479578	3.89664	-0.123075	0.902048	1
LOC108697257	2.32109	0.383274	2.85073	0.134448	0.893049	1
LOC108697258	1.7085	-0.442898	3.72403	-0.11893	0.905331	1
LOC108697259	319.75	0.233088	0.277199	0.840869	0.400422	0.78586
LOC108697260	23.3117	-2.90222	0.675145	-4.29867	1.71829e-05	0.000379285
LOC108697261	47.6369	0.820006	0.663563	1.23576	0.216547	0.597406
LOC108697262	26.6352	1.40651	1.18396	1.18797	0.234844	0.622335
LOC108697263	211.448	-0.522963	1.66018	-0.315005	0.752758	0.951318
LOC108697264	4.20775	-0.145153	2.939	-0.0493887	0.96061	1
LOC108697265	30.9177	0.022913	0.415296	0.0551728	0.956001	0.993332
LOC108697266	68.1329	-0.604696	0.377971	-1.59985	0.109633	0.413436
LOC108697267	345.896	-0.014518	0.195845	-0.0741301	0.940907	0.992267
LOC108697268	13.4012	0.184998	1.67008	0.110772	0.911797	1
LOC108697271	3.70207	1.11634	3.40511	0.327843	0.743031	1
LOC108697272	358.438	-0.09281	0.236791	-0.391949	0.695096	0.934971
LOC108697275	14.1951	-0.463347	1.09717	-0.42231	0.672798	1
LOC108697277	101.658	-0.0553577	0.437034	-0.126667	0.899204	0.982826
LOC108697279	2.79377	-0.679257	2.77811	-0.244504	0.806841	1
LOC108697281	48.7414	-0.355315	0.511342	-0.694866	0.487139	0.845341
LOC108697282	13.0444	-0.116798	0.682694	-0.171084	0.864158	1		X
LOC108697285	2.75577	0.578527	3.61103	0.160211	0.872715	1
LOC108697286	1.59736	-3.27711	3.14253	-1.04283	0.297029	1
LOC108697287	237.336	0.139256	0.219198	0.635297	0.525235	0.866925
LOC108697288	5.26754	0.0599634	2.08247	0.0287943	0.977029	1
LOC108697289	6.90334	-0.258882	2.23852	-0.115649	0.907931	1
LOC108697290	3.80528	1.02772	2.29107	0.448577	0.653737	1
LOC108697291	5.29432	1.58449	3.65285	0.433767	0.664458	1
LOC108697293	139.763	0.0455018	0.274304	0.165881	0.868251	0.977367
LOC108697295	11.1389	-0.933865	3.86816	-0.241424	0.809227	1
LOC108697297	155.51	-0.259453	0.344527	-0.753069	0.451409	0.822491
LOC108697299	10.1693	-0.882117	1.07317	-0.82197	0.411094	1
LOC108697300	16.3695	-1.3238	0.813731	-1.62683	0.103774	1
LOC108697302	6.94767	0.545477	1.71053	0.318893	0.749807	1
LOC108697305	32.2778	-0.52023	1.45269	-0.358115	0.720257	0.941461
LOC108697306	290.879	-0.493946	0.417426	-1.18331	0.236685	0.625075
LOC108697307	48.2753	-0.198452	0.357581	-0.554984	0.578906	0.894872
LOC108697308	6.89664	0.405887	1.39439	0.291087	0.770985	1
LOC108697309	101.98	-0.695188	0.275485	-2.52351	0.011619	0.0890845
LOC108697311	315.879	0.517014	0.292396	1.7682	0.0770278	0.332604
LOC108697312	223.954	-2.56508	0.249635	-10.2753	9.10331e-25	2.47827e-22		X
LOC108697317	62.1207	2.55914	1.32178	1.93613	0.0528517	0.261774
LOC108697318	16.5732	-0.252006	1.03169	-0.244265	0.807026	1
LOC108697319	8.606	0.512245	1.45612	0.351788	0.724997	1
LOC108697320	14.2141	-0.0328289	1.30233	-0.0252078	0.979889	1
LOC108697321	18.7489	0.429086	0.715169	0.599979	0.54852	1
LOC108697324	112.223	-0.419614	0.242982	-1.72693	0.0841799	0.351539
LOC108697325	46.4165	0.368609	0.812967	0.453412	0.650252	0.920647
LOC108697326	118.226	0.0461111	0.22434	0.205542	0.837149	0.97059
LOC108697329	2.18952	0.5089	3.01274	0.168916	0.865863	1
LOC108697332	79.8343	0.530627	0.427729	1.24057	0.214765	0.595168
LOC108697336	134.726	-0.0148529	0.288409	-0.0514993	0.958928	0.994173
LOC108697341	6.51274	1.50953	1.42105	1.06226	0.288117	1
LOC108697342	2.28202	-0.730788	2.19211	-0.333372	0.738854	1
LOC108697344	49.0339	0.533777	0.564262	0.945973	0.344162	0.738579
LOC108697345	4.09459	-1.23477	1.39765	-0.883465	0.376985	1
LOC108697348	682.409	0.180148	0.24841	0.725202	0.468328	0.833571
LOC108697351	7.19926	0.963813	1.23921	0.777766	0.436707	1
LOC108697352	12.4414	-0.0214329	1.16499	-0.0183974	0.985322	1
LOC108697353	4.55304	-1.04193	2.80716	-0.371169	0.710512	1
LOC108697358	2.39975	-2.44235	2.15104	-1.13542	0.256198	1
LOC108697359	18.4205	0.100908	0.700617	0.144028	0.885479	1
LOC108697360	2.65083	-2.68618	1.80555	-1.48773	0.136821	1
LOC108697364	97.5712	0.41381	0.237027	1.74584	0.080839	0.342772
LOC108697367	21.2333	-0.10629	0.595983	-0.178344	0.858453	0.975402
LOC108697369	2.52803	-1.65666	3.52051	-0.470574	0.637945	1
LOC108697383	2.35794	-0.015069	2.87278	-0.00524543	0.995815	1
LOC108697386	501.396	-0.687388	0.212016	-3.24215	0.00118633	0.0143464
LOC108697387	96.9548	-0.309307	0.306017	-1.01075	0.312135	0.708688
LOC108697388	107.744	-0.0108813	0.351321	-0.0309726	0.975291	0.996144
LOC108697389	6.16292	1.93341	1.44572	1.33734	0.181113	1
LOC108697393	74.6123	0.656314	0.310177	2.11593	0.0343504	0.196283
LOC108697397	52.253	-0.241037	0.346686	-0.695262	0.486891	0.845231
LOC108697398	4.92325	0.0411809	2.25241	0.018283	0.985413	1
LOC108697399	596.897	0.0401157	0.287368	0.139597	0.888978	0.981207
LOC108697400	109.035	0.164436	0.230127	0.714545	0.47489	0.838408
LOC108697401	132.022	0.633494	0.229701	2.7579	0.00581733	0.0529581
LOC108697406	102.52	0.551618	0.25436	2.16865	0.0301096	0.17933
LOC108697408	624.068	0.39874	0.267782	1.48905	0.136475	0.467974
LOC108697410	384.883	0.827231	0.231961	3.56625	0.000362125	0.00535991
LOC108697411	9.36695	-0.668675	1.76894	-0.378009	0.705424	1
LOC108697415	2.43267	-0.704181	2.09605	-0.335956	0.736904	1
LOC108697416	131.308	0.777436	0.289707	2.68352	0.00728513	0.0628382
LOC108697417	113.015	-0.482455	0.256752	-1.87907	0.0602348	0.284832
LOC108697420	529.141	-0.303105	0.271045	-1.11828	0.263447	0.659277
LOC108697421	4.61183	-2.92786	1.84627	-1.58583	0.112778	1
LOC108697426	17.4467	0.19345	1.26437	0.153001	0.878398	1
LOC108697427	13.7303	-1.77934	1.53257	-1.16102	0.245634	1
LOC108697428	51.6301	-5.45035	0.669999	-8.13487	4.12383e-16	4.86102e-14
LOC108697429	5.23569	0.477123	1.66312	0.286885	0.7742	1
LOC108697430	57.0093	0.149268	0.390567	0.382183	0.702326	0.937457
LOC108697431	42.1603	-0.780946	0.394517	-1.9795	0.0477599	0.244498
LOC108697433	25.0983	0.625683	1.31416	0.47611	0.633996	0.914991
LOC108697434	129.847	-0.003561	0.215791	-0.0165021	0.986834	0.998163
LOC108697435	3.33269	-0.284391	3.4022	-0.0835903	0.933382	1
LOC108697436	13.3617	0.982608	1.05481	0.931548	0.35157	1
LOC108697440	4.45875	-1.2262	1.58863	-0.771859	0.440198	1
LOC108697441	15.3274	0.801348	1.0797	0.742194	0.45797	1
LOC108697442	3.78083	1.64879	2.37637	0.693828	0.48779	1
LOC108697444	1311.66	-0.919038	0.290935	-3.15891	0.00158361	0.0182438
LOC108697447	129.672	-0.259678	0.264448	-0.981962	0.326119	0.722294
LOC108697450	121.353	-0.105713	2.75458	-0.0383772	0.969387	0.994939
LOC108697453	55.6615	1.04188	0.343238	3.03545	0.0024018	0.0257273
LOC108697455	4.75847	1.1675	3.34869	0.348643	0.727357	1
LOC108697458	3.38121	-0.131684	2.9608	-0.0444757	0.964525	1
[truncated: 40,999 more rows]

## Sheet: 46_FBvSC
geneSymbol	baseMean	log2FoldChange	lfcSE	stat	pvalue	padj	NPC Enriched	IN Enriched
12S ribosomal RNA	62.5803	-1.50256	0.339381	-4.42736	9.53951e-06	9.85306e-05
16S ribosomal RNA	24244.3	-1.03743	0.326557	-3.17687	0.00148876	0.00858892
1a11.L	9.3369	-0.440253	1.15592	-0.380868	0.703301	1
42sp43.L	5.85442	1.03749	2.24654	0.461817	0.644212	1
42sp50.L	7.09614	0.352154	2.01724	0.174572	0.861416	1		X
ATP6	595.727	-0.898827	0.634771	-1.41599	0.15678	0.343005
ATP8	33.1282	-0.712678	0.730296	-0.975875	0.329126	0.560869
COX1	19387.3	-0.603092	0.306659	-1.96665	0.0492235	0.14652
COX2	3453.22	-0.709013	0.395735	-1.79164	0.0731915	0.197494
COX3	6220.2	-1.14207	0.461355	-2.47546	0.0133065	0.0528115
CYTB	50.0152	-0.675939	0.536607	-1.25965	0.207794	0.413892
LOC100036663.S	7.60294	-0.282364	1.54403	-0.182875	0.854896	1
LOC100036800	4.46724	0.251602	3.04498	0.0826283	0.934147	1
LOC100036800.S	3.55722	0.451239	3.44807	0.130867	0.89588	1
LOC100036803	535.519	-0.149339	0.252656	-0.591078	0.554468	0.762306
LOC100036818	24.0914	1.64483	0.535639	3.07078	0.00213499	0.0116639
LOC100036823	30.334	1.26415	0.603841	2.09351	0.0363033	0.116412
LOC100036824	8.78133	-2.76007	1.4929	-1.8488	0.0644872	1
LOC100036831	362.051	0.219227	0.158139	1.38629	0.165658	0.356238
LOC100036845	24.9355	0.213323	2.01612	0.105809	0.915734	0.967123
LOC100036845.L	7.35308	0.864196	2.54037	0.340185	0.733717	1
LOC100036869	71.0833	-0.26967	0.327032	-0.824599	0.409599	0.641753
LOC100036872	10.0674	-0.50756	1.7485	-0.290283	0.7716	1
LOC100036880	2.57404	0.412094	3.52459	0.11692	0.906924	1
LOC100036883	6.72819	-0.307034	1.65977	-0.184986	0.85324	1
LOC100036895	3.61363	0.298392	3.92657	0.0759932	0.939424	1
LOC100036897	6.83053	1.15401	2.24309	0.514471	0.606922	1
LOC100036907.L	29.0113	-0.0317758	0.666431	-0.0476805	0.961971	0.985257
LOC100036910	558.337	0.335622	0.231613	1.44906	0.14732	0.328403
LOC100036914	1.22285	1.96666	2.71033	0.725615	0.468075	1
LOC100036915	248.673	0.286886	0.211433	1.35687	0.174824	0.369009
LOC100036918	5.39275	1.48036	1.51893	0.974612	0.329753	1
LOC100036932	17.6348	-1.69171	1.32789	-1.27398	0.20267	0.40761
LOC100036952	18.3675	-0.624538	1.08431	-0.575977	0.564631	0.769269
LOC100036976	5.95949	-1.78768	1.49267	-1.19764	0.231059	1
LOC100036994	143.952	0.691818	0.305486	2.26465	0.0235341	0.0835882
LOC100036997	29.9487	-1.08436	0.678385	-1.59844	0.109946	0.267214
LOC100037001	288.67	-0.0833919	0.237015	-0.351842	0.724956	0.876182
LOC100037016	18.5007	-0.121267	0.690524	-0.175616	0.860595	0.944177
LOC100037047	4.81445	0.869376	3.26886	0.265957	0.790272	1
LOC100037090	210.029	-0.00434168	0.280572	-0.0154744	0.987654	0.995392
LOC100037108	225.346	2.5321	0.223527	11.328	9.53951e-30	9.5775e-28
LOC100037118	30.2493	-0.0900236	0.699505	-0.128696	0.897598	0.96019
LOC100037145	12.3115	-0.26863	1.31286	-0.204614	0.837874	1
LOC100037177	5.1325	-0.318344	1.60013	-0.198949	0.842303	1
LOC100037180	22.8855	0.374141	1.50033	0.249372	0.803073	0.916324
LOC100037191.L	6.15874	1.61971	2.70579	0.598607	0.549435	1
LOC100037197	3.57293	-0.855323	2.4773	-0.345265	0.729895	1
LOC100037204	5.73976	0.382935	2.26359	0.169172	0.865662	1
LOC100037213	469.958	0.169247	0.285227	0.593378	0.552928	0.761381
LOC100037217	55.1318	2.10271	0.45804	4.59067	4.41824e-06	4.94734e-05
LOC100037226	172.287	0.308925	0.225973	1.36709	0.171598	0.364683
LOC100037235	68.1852	-0.506123	0.281745	-1.79639	0.0724332	0.196029
LOC100037903.1	4.66556	-1.57784	1.31242	-1.20223	0.229273	1
LOC100049113	8.3164	0.328518	1.30772	0.251214	0.801648	1
LOC100049116	294.558	0.52388	0.180259	2.90626	0.00365779	0.0183307
LOC100049121	216.722	-0.0826262	0.226209	-0.365265	0.714914	0.870394
LOC100049127	42.7028	-0.515936	0.416742	-1.23802	0.215708	0.424571
LOC100049136	1630.88	1.26995	0.294518	4.31198	1.61802e-05	0.000158615
LOC100049756	4.22052	0.732038	1.66582	0.439445	0.660339	1
LOC100101274	4.50384	-0.0362307	3.08194	-0.0117558	0.99062	1
LOC100101277	188.635	0.738261	0.219855	3.35795	0.000785234	0.00496143
LOC100101278	1.5564	1.1359	2.63371	0.431294	0.666255	1
LOC100101281	45.1442	-0.488418	0.378479	-1.29047	0.196886	0.399722
LOC100101282	11.2863	0.0273697	1.62559	0.0168368	0.986567	1
LOC100101283	58.3135	0.463584	0.32623	1.42103	0.155307	0.340766		X
LOC100101333	60.7444	-0.552334	0.464159	-1.18997	0.234059	0.448653
LOC100125664	13.5415	0.689039	1.69553	0.406385	0.68446	1
LOC100125668	276.129	-0.75921	0.205256	-3.69884	0.000216589	0.0016022
LOC100126603	30.1513	0.842573	0.580431	1.45163	0.146603	0.327298
LOC100126627	1.82925	1.35369	3.01216	0.449409	0.653137	1
LOC100126638	34.9776	0.864847	0.461782	1.87284	0.0610898	0.172481
LOC100126648	99.2574	-0.225486	0.397434	-0.567354	0.570474	0.773363
LOC100126651	20.2893	1.05089	1.22595	0.857204	0.391332	0.62414
LOC100126657	5.77249	1.43889	2.48885	0.578137	0.563172	1
LOC100126660	109.34	-3.05677	0.339902	-8.9931	2.40364e-19	1.20661e-17
LOC100127249	9.05274	0.908591	2.02568	0.448537	0.653766	1
LOC100127254	5.00883	-1.06257	2.41099	-0.440721	0.659415	1
LOC100127277	128.52	-0.171151	0.889305	-0.192454	0.847386	0.937084
LOC100127280	94.7895	0.0751389	1.60828	0.0467201	NA	1
LOC100127286	24.526	0.0214933	0.591252	0.0363522	0.971002	0.988821
LOC100127287	16.1613	0.220408	1.56488	0.140847	0.887991	1
LOC100127296	95.1775	0.0517767	0.25274	0.204861	0.837681	0.932605
LOC100127300	75.6197	0.260905	0.296548	0.879807	0.378964	0.61216
LOC100127316	45.3784	0.371149	0.485136	0.765042	0.444247	0.6719
LOC100127323	89.626	0.397649	0.351672	1.13074	0.258165	0.478299
LOC100127329	1311.98	0.229348	0.24463	0.93753	0.348486	0.581768
LOC100127334	2.85012	0.993625	2.63466	0.377136	0.706072	1
LOC100127337	4.95671	-0.430147	2.30062	-0.18697	0.851684	1
LOC100127794.L	21.5508	0.160331	1.10184	0.145512	0.884306	0.954607
LOC100135120.L	86.2139	0.627831	0.351659	1.78534	0.0742061	0.199562
LOC100135146.L	15.8946	-2.35317	0.912052	-2.58008	0.00987782	1
LOC100135146.S	8.84679	-0.710192	1.56226	-0.454592	0.649403	1
LOC100135389.L	6.4318	-0.19838	2.77896	-0.0713865	0.94309	1
LOC100137612	70.1724	-0.128097	0.241713	-0.529954	0.596144	0.792003
LOC100137619	4.31931	-2.19798	2.50735	-0.876611	0.380698	1
LOC100137633	2.83587	-0.362269	2.81564	-0.128663	0.897624	1
LOC100137634	176.97	-0.573951	0.193392	-2.96781	0.00299925	0.0155468		X
LOC100137643	4.03486	0.495698	2.48722	0.199298	0.842029	1
LOC100137665	14.6927	0.869335	1.59382	0.545442	0.58545	1
LOC100137672	21.9814	-0.294432	0.663699	-0.443622	0.657316	0.833892
LOC100137672.S	32.9537	-1.30038	0.510373	-2.5479	0.0108374	0.0446967
LOC100137678	10.1954	-0.021513	2.37099	-0.00907342	0.992761	1
LOC100137691	272.505	-4.71431	0.335506	-14.0514	7.55565e-45	1.64242e-42
LOC100137715	2.69968	1.23162	3.19575	0.385394	0.699946	1
LOC100144987.S	2.33056	1.28486	2.31902	0.554052	0.579543	1
LOC100145345.L	11.9627	0.26229	1.38339	0.189599	0.849623	1
LOC100145450.S	105.956	-0.176548	0.25588	-0.689964	0.490217	0.711532
LOC100145473.S	4.63953	-0.742733	2.93469	-0.253087	0.800201	1
LOC100145531.L	21.9492	0.101028	0.731346	0.13814	0.89013	0.957194
LOC100145533.L	72.3787	0.522402	1.33969	0.389942	0.69658	0.858817
LOC100145817.L	2.5179	0.380547	3.09553	0.122934	0.902159	1
LOC100158280	8.87616	1.08242	1.56614	0.691137	0.489479	1
LOC100158299	225.732	-0.0140941	0.18438	-0.0764404	0.939069	0.97679
LOC100158305.L	12.4137	1.1306	1.50555	0.750954	0.45268	1
LOC100158309	6.22552	1.36001	3.00833	0.452082	0.65121	1
LOC100158314	5.77096	-0.212076	2.29447	-0.0924295	0.926357	1
LOC100158321	73.7551	0.00510749	0.285732	0.0178751	0.985738	0.994745
LOC100158331	35.3485	0.295099	0.495839	0.595152	0.551742	0.760499
LOC100158340	801.69	-1.37727	0.214396	-6.42393	1.32797e-10	2.9656e-09
LOC100158347	166.973	-0.996153	0.24423	-4.07875	4.52786e-05	0.000399564
LOC100158361	184.449	-0.670804	0.272438	-2.46222	0.0138078	0.0543099
LOC100158366	46.4092	-2.71308	0.798749	-3.39666	0.000682137	0.0043794
LOC100158370	111.934	0.53353	0.243237	2.19346	0.0282745	0.0961586
LOC100158382	120.602	0.53036	0.274405	1.93276	0.0532653	0.155312
LOC100158389	7.08359	-0.0124989	2.08018	-0.00600859	0.995206	1
LOC100158394	185.264	0.0810039	0.204529	0.396051	0.692068	0.855213
LOC100158410.L	111.037	0.0533474	0.334151	0.159651	0.873156	0.949322
LOC100158433.L	55.5545	1.0609	0.397935	2.66601	0.00767582	0.0337298
LOC100158544.S	7.83478	0.736086	4.10609	0.179267	0.857728	1
LOC100170619.S	5.90196	-0.479704	1.67733	-0.285993	0.774884	1
LOC100174801	8.8985	1.44397	1.67912	0.859955	0.389814	1
LOC100174804	292.099	0.0182859	0.21311	0.085805	0.931621	0.97281
LOC100174808	11.7109	0.482199	3.53865	0.136267	0.891611	1
LOC100189560	71.4898	0.391806	0.311094	1.25945	0.207869	0.413892
LOC100189574	77.872	-0.319232	0.38838	-0.821958	0.411101	0.642988
LOC100191024	34.6537	0.604697	1.05371	0.573876	0.566052	0.770209
LOC100191026	194.598	-0.119283	0.231439	-0.515395	0.606277	0.800025
LOC100192369	9.62461	1.95474	1.20281	1.62514	0.104133	1
LOC100217319	51.3287	0.144699	0.347408	0.416509	0.677037	0.846518
LOC100301958	52.0187	-0.377612	0.336245	-1.12303	0.261426	0.482718
LOC100335021	11.7079	-0.181899	1.67739	-0.108441	0.913646	1
LOC100335115	1915.15	0.467255	0.553465	0.844236	0.398538	0.631171
LOC100337617	12.401	-0.648726	1.25432	-0.517195	0.60502	1
LOC100379118	9.06882	-2.34757	1.21463	-1.93275	0.0532674	1
LOC100462904	951.88	-0.0320632	0.274216	-0.116927	0.906918	0.962658
LOC100462905	451.656	0.350574	0.244973	1.43107	0.15241	0.336164
LOC100485017.S	2.90261	0.745173	3.21082	0.232082	0.816474	1
LOC100485044.L	5.5335	0.589191	1.54731	0.380784	0.703364	1
LOC100485105.S	14.1614	0.276799	3.21239	0.0861661	0.931334	1
LOC100485132.L	7.15864	0.216449	2.84932	0.075965	0.939447	1
LOC100485199-like.S	11.9228	1.29794	0.873592	1.48575	0.137344	1
LOC100485290.L	30.7999	0.545806	0.442628	1.2331	0.217537	0.426718
LOC100485292.L	7.25016	-0.373695	2.17097	-0.172133	0.863333	1
LOC100485439.L	2.03311	0.897735	2.96844	0.302427	0.762327	1
LOC100485470.1.L	10.7362	-0.892781	1.19089	-0.749673	0.453452	1
LOC100485504.L	1.51917	-0.456574	3.09813	-0.14737	0.88284	1
LOC100485669.L	12.6163	-0.862701	1.24774	-0.69141	0.489308	1
LOC100485723.L	2.00147	2.67531	2.55433	1.04737	0.294931	1
LOC100485767-like.S	1.63549	0.235206	2.39583	0.098173	0.921795	1
LOC100485776.L	8.93233	0.102833	3.85833	0.0266521	0.978737	1
LOC100485784-like.S	2.86807	0.370022	4.04676	0.0914364	0.927146	1
LOC100485829.S	4.468	-1.49532	1.94701	-0.768004	0.442485	1
LOC100485975.L	2.74181	-0.0480724	2.98514	-0.0161039	0.987151	1
LOC100486031.S	3.03006	-0.187888	2.89257	-0.0649552	0.94821	1
LOC100486034.L	1.12773	4.22116	2.87523	1.46811	0.142074	1
LOC100486127.S	33.9537	-2.19947	0.623755	-3.52619	0.000421592	0.00286799
LOC100486133.S	37.0738	2.3199	0.610004	3.80308	0.000142906	0.00110981
LOC100486289.L	10.5271	0.129814	1.8259	0.0710957	0.943322	1
LOC100486352-like.L	3.9439	0.904188	3.16108	0.286037	0.774849	1
LOC100486352-like.S	7.27029	0.968539	2.58273	0.375005	0.707657	1
LOC100486380.L	6.48486	1.89611	2.00188	0.947168	0.343553	1
LOC100486434-like.L	3.94819	0.188081	2.27341	0.0827308	0.934066	1
LOC100486572.L	4.08181	-1.68464	3.37677	-0.49889	0.617857	1
LOC100486657.L	1.94519	-1.32176	2.89697	-0.456257	0.648205	1
LOC100486734-like.L	8.96526	1.76203	1.03673	1.6996	0.089207	1
LOC100486734-like.S	10.7152	0.598093	1.86175	0.321253	0.748018	1
LOC100486853.L	2.6885	-0.121962	4.06861	-0.0299763	0.976086	1
LOC100486894.S	3.13632	-1.15114	2.08364	-0.552469	0.580627	1
LOC100486959.1	1.58617	1.10843	3.65031	0.303653	0.761393	1
LOC100486966.L	18.7266	-0.00556995	1.20835	-0.00460955	0.996322	0.998687
LOC100487224.L	46.066	-1.72642	0.471044	-3.66509	0.000247254	0.00179762
LOC100487262.S	63.5538	1.18798	0.461798	2.5725	0.0100966	0.0422217
LOC100487264.1	3.29504	-0.316963	3.97664	-0.0797063	0.936471	1
LOC100487306.S	2.50312	-2.26815	4.08822	-0.554801	0.579031	1
LOC100487408.L	6.74805	1.34858	3.1492	0.428229	0.668485	1
LOC100487412.L	9.89607	-0.539672	2.16807	-0.248918	0.803424	1
LOC100487423.L	5.45231	0.369756	2.86957	0.128854	0.897473	1
LOC100487482.S	2.69852	-0.052502	2.63307	-0.0199394	0.984092	1
LOC100487499.S	209.472	-0.582179	0.217328	-2.6788	0.00738855	0.0327897
LOC100487648.1.L	4.27361	0.0723952	2.42076	0.0299059	0.976142	1
LOC100487668.L	9.75167	0.323202	0.842231	0.383745	0.701168	1
LOC100487732	1.31082	-2.20866	4.34559	-0.508252	0.611277	1
LOC100487740.S	3.39372	0.463848	2.38872	0.194182	0.846033	1
LOC100487885.L	1.3659	0.0313315	3.68454	0.0085035	0.993215	1
LOC100487918.L	4.06479	1.48981	2.5732	0.578974	0.562607	1
LOC100488087.L	18.9991	1.346	0.645805	2.08422	0.03714	0.118534
LOC100488137.L	3.52792	0.328893	3.52838	0.0932136	0.925734	1
LOC100488166.L	2.12832	2.14485	4.14846	0.517024	0.60514	1
LOC100488177.S	9.60662	0.714902	1.92838	0.370728	0.71084	1
LOC100488227.L	5.97738	-0.51543	2.15353	-0.239342	0.81084	1
LOC100488328.L	1.40825	-0.0808315	3.54809	-0.0227817	0.981824	1
LOC100488333.L	20.0876	-1.07077	0.838312	-1.27729	0.201499	0.405863
LOC100488348.S	6.58663	-1.96457	1.23411	-1.59188	0.111411	1
LOC100488377.S	3.83553	-0.185434	2.77353	-0.0668582	0.946695	1
LOC100488442.S	17.0079	2.24821	1.02048	2.2031	0.0275879	1
LOC100488486.L	4.93219	-1.29632	2.28827	-0.566508	0.571049	1
LOC100488567.L	104.745	-0.915877	0.292044	-3.13609	0.00171217	0.00966599
LOC100488577.L	10.4752	0.897173	2.45361	0.365654	0.714623	1
LOC100488626.L	27.8339	-1.71733	0.613648	-2.79856	0.00513305	0.0242208
LOC100488642.L	2.47911	0.101126	3.56872	0.0283369	0.977393	1
LOC100488689.S	87.8661	0.620924	0.325768	1.90603	0.056646	0.162806
LOC100488695.S	2.77374	4.3739	4.27	1.02433	0.305678	1
LOC100488697.L	6.08107	-0.0530102	1.4479	-0.0366118	0.970795	1
LOC100488701.S	6.05799	-1.4142	2.44417	-0.578601	0.562859	1
LOC100488805.L	7.54751	0.494073	3.46717	0.1425	0.886685	1
LOC100488828.L	6.78082	-0.805186	2.51936	-0.319599	0.749272	1
LOC100488885-like.L	226.893	2.32803	0.227074	10.2523	1.15572e-24	8.63837e-23
LOC100488906.L	3.29302	0.575754	3.13897	0.183421	0.854467	1
LOC100489069.S	7.24884	0.171556	2.42965	0.0706094	0.943709	1
LOC100489074.L	5.63929	0.486395	3.24322	0.149973	0.880786	1
LOC100489118.L	2.57265	0.430341	4.09483	0.105094	0.916301	1
LOC100489122.L	13.2253	-0.0708169	1.13759	-0.0622515	0.950363	1
LOC100489157-like.S	1.86277	0.11742	2.90206	0.040461	0.967726	1
LOC100489188.L	5.37063	1.50039	1.56474	0.958878	0.33762	1
LOC100489282.L	1.9537	0.430249	4.15755	0.103486	0.917577	1
LOC100489282.S	4.56043	-0.160102	2.74603	-0.0583032	0.953507	1
LOC100489286-like.L	2.93717	-0.612552	2.90859	-0.210601	0.833198	1
LOC100489326.S	9.13074	-0.00202933	1.15733	-0.00175347	0.998601	1
LOC100489554.L	5.11192	-0.35184	1.9427	-0.181109	0.856282	1
LOC100489764.L	10.6827	0.0844113	1.49365	0.0565136	0.954933	1
LOC100489771.S	54.196	0.917994	0.400909	2.28978	0.0220338	0.0792456
LOC100489773-like.S	12.1365	0.35779	0.813107	0.440028	0.659917	1
LOC100489832.L	1.43565	-2.76586	2.8613	-0.966646	0.333721	1
LOC100489882.L	5.24709	0.103954	3.70049	0.028092	0.977589	1
LOC100489972.L	2.5743	0.102151	4.0917	0.0249654	0.980083	1
LOC100490013.L	2.7117	2.49485	2.48838	1.0026	0.316054	1
LOC100490018.L	11.2558	0.161578	2.15187	0.0750872	0.940145	1
LOC100490286.S	1.45626	2.91935	4.24944	0.686996	0.492085	1
LOC100490389-like.L	5.11968	-1.23387	2.46906	-0.499733	0.617263	1
LOC100490462.L	5.21275	0.859025	2.4978	0.343913	0.730912	1
LOC100490530.L	48.9486	-0.340495	0.308868	-1.1024	0.27029	0.493546
LOC100490553.S	7.39841	0.0961844	2.51557	0.0382356	0.9695	1
LOC100490559.S	21.8932	0.163569	0.691188	0.236649	0.812929	0.92111
LOC100490682.1.L	8.93724	-0.140271	2.10362	-0.0666805	0.946836	1
LOC100490725.S	2.25606	0.344243	3.13559	0.109786	0.912579	1
LOC100490741.L	27.1857	-0.565652	0.700059	-0.808006	0.419087	0.651095
LOC100490786.L	3.57601	0.432933	2.59955	0.166541	0.867731	1
LOC100490894.S	3.16183	0.523588	3.99535	0.131049	0.895736	1
LOC100490918.L	7.30465	-0.873102	2.04262	-0.427442	0.669058	1
LOC100490937.L	1.45447	2.5307	2.66416	0.949905	0.34216	1
LOC100490989.L	5.43779	0.406091	3.31411	0.122534	0.902476	1
LOC100491090.L	2.26466	1.10966	3.162	0.350936	0.725636	1
LOC100491107.L	1.72245	4.61195	4.00775	1.15076	0.249832	1
LOC100491114.S	3.4949	-0.300047	3.36531	-0.0891588	0.928956	1
LOC100491211.L	15.1033	0.28937	1.84968	0.156443	0.875684	1
LOC100491220.L	1.51596	1.12886	4.21022	0.268124	0.788604	1
LOC100491357.S	6.6694	0.0550499	3.16457	0.0173957	0.986121	1
LOC100491389.L	5.91316	0.324618	2.78778	0.116444	0.907301	1
LOC100491404.S	2.21342	-0.00191673	3.56042	-0.000538344	0.99957	1
LOC100491437-like.L	16.3937	0.794117	1.51693	0.523504	0.600624	1
LOC100491437-like.S	4.08562	0.71541	3.02409	0.23657	0.81299	1
LOC100491450.S	13.5292	0.0435809	1.23336	0.0353353	0.971812	1
LOC100491454.L	3.9427	-1.78256	1.99892	-0.891763	0.37252	1
LOC100491454.S	2.9181	0.792316	3.59185	0.220587	0.825414	1
LOC100491587.L	6.18931	0.892449	2.92186	0.305439	0.760032	1
LOC100491587.S	4.97618	1.22658	2.85342	0.429862	0.667296	1
LOC100491616-like.L	14.496	-0.0427637	1.10358	-0.0387498	0.96909	1
LOC100491629.S	7.3302	0.0490396	2.17613	0.0225352	0.982021	1
LOC100491824.S	5.79235	0.349908	3.02834	0.115544	0.908014	1
LOC100491907.S	3.11118	1.10475	1.70051	0.649656	0.515914	1
LOC100491930.L	3.66307	-0.309562	2.02668	-0.152743	0.878601	1
LOC100491939.S	113.763	0.545846	0.333681	1.63583	0.101875	0.252676
LOC100491961.S	2.13102	1.74372	3.48058	0.500986	0.616381	1
LOC100491966.1.L	7.79389	0.358117	2.68738	0.133259	0.893989	1
LOC100492080.1	1.98524	-0.51178	3.1701	-0.16144	0.871747	1
LOC100492152.L	1.52262	-0.934279	3.82326	-0.244367	0.806946	1
LOC100492197-like.L	200.127	-0.186228	0.239151	-0.778705	0.436153	0.665564
LOC100492376.L	1.69552	3.55351	4.2874	0.828827	0.407202	1
LOC100492420.S	15.612	0.0088077	1.28612	0.00684827	0.994536	1
LOC100492487.S	60.7597	2.39572	0.372612	6.42954	1.27991e-10	2.86367e-09
LOC100492546-like.S	3.90746	2.1113	2.07117	1.01938	0.308025	1
LOC100492639-like.S	7.10719	0.00385951	1.50503	0.00256441	0.997954	1
LOC100492643.L	1.65413	1.63113	2.23365	0.730253	0.465236	1
LOC100492708	27.9103	0.551845	0.654658	0.842951	0.399256	0.631844
LOC100492859.S	4.47331	0.282825	1.80998	0.156259	0.875829	1
LOC100492885.L	81.2207	-1.48721	0.55078	-2.70018	0.0069301	0.0311874
LOC100492888-like.L	20.7953	0.256141	0.914343	0.280137	0.779372	0.903912
LOC100492899.L	3.29309	1.1441	2.30259	0.496877	0.619276	1
LOC100492951-like.S	135.137	-0.490123	0.288999	-1.69593	0.0898986	0.229854
LOC100492960.S	1.75002	2.35568	3.65536	0.644446	0.519286	1
LOC100493020.L	2.6004	-0.503261	2.75944	-0.182378	0.855286	1
LOC100493071.L	44.6537	0.550529	3.26464	0.168634	0.866085	0.94641
LOC100493076.L	4.07194	-0.181363	2.53172	-0.0716361	0.942891	1
LOC100493184.L	17.4577	0.350812	1.6479	0.212884	0.831418	0.92938
LOC100493194.L	10.8198	0.689892	2.22728	0.309746	0.756754	1
LOC100493237.L	1.98126	-0.252428	2.54333	-0.099251	0.920939	1
LOC100493256-like.L	4.91748	-0.60333	2.39134	-0.252298	0.800811	1
LOC100493256-like.S	2.479	-0.37373	3.57376	-0.104576	0.916712	1
LOC100493283-like.L	37.3803	0.829928	0.656869	1.26346	0.206424	0.412213
LOC100493356.L	11.2001	1.42711	2.24065	0.636915	0.52418	1
LOC100493356.S	6.35194	-0.434338	2.11236	-0.205617	0.83709	1
LOC100493381.L	7.14526	0.877547	3.11532	0.281688	0.778183	1
LOC100493382.L	60.5282	-1.0079	0.56116	-1.7961	0.0724782	0.196106
LOC100493422.S	2.98434	-2.23413	3.09596	-0.721628	0.470523	1
LOC100493447.L	2.04298	-0.431478	3.19333	-0.135119	0.892518	1
LOC100493447.S	1.83394	1.46358	3.78913	0.386259	0.699305	1
LOC100493463.L	3.66254	1.11381	3.2107	0.346905	0.728663	1
LOC100493498.L	1.96908	-0.283615	3.28513	-0.0863329	0.931202	1
LOC100493512.1	4.15979	1.21295	2.52401	0.480566	0.630825	1
LOC100493549.L	5.33207	1.5979	3.21903	0.496391	0.619618	1
LOC100493618.L	4.45362	0.338	3.12442	0.10818	0.913853	1
LOC100493672.L	3.9166	-0.968177	2.81443	-0.344005	0.730843	1
LOC100493742.1	12.4744	1.54589	2.25057	0.686889	0.492153	1
LOC100493745.L	206.755	0.268411	0.198966	1.34903	0.177327	0.372481
LOC100493773.L	1.96941	0.101277	4.19459	0.0241448	0.980737	1
LOC100493778.L	2.66203	-0.262926	4.01084	-0.0655538	0.947733	1
LOC100493912.S	22.4095	0.999912	0.980133	1.02018	0.307643	0.537479
LOC100493955.L	7.00276	-0.198888	2.55547	-0.0778282	0.937965	1
LOC100493956.S	5.46971	1.53401	3.65957	0.419178	0.675086	1
LOC100493968.1.L	9.39478	-0.755392	0.905787	-0.833962	0.404302	1
LOC100494033.L	25.1979	0.804227	2.20003	0.365553	0.714699	0.870394
LOC100494136.L	10.9009	0.210891	2.07955	0.101412	0.919224	1
LOC100494386.L	10.268	-0.000337164	0.804812	-0.000418934	0.999666	1
LOC100494454.S	4.21003	1.11581	2.91563	0.382702	0.701941	1
LOC100494476.L	31.5122	1.33026	0.663641	2.00448	0.0450181	0.13694
LOC100494536.S	4.96096	0.485116	2.34185	0.207151	0.835892	1
LOC100494571.S	3.39589	1.11249	3.4513	0.32234	0.747195	1
LOC100494592.L	1.05434	-3.53337	3.48365	-1.01427	0.310454	1
LOC100494604.L	9.23025	0.626599	4.09531	0.153004	0.878395	1
LOC100494615.S	1.50519	0.101277	4.19459	0.0241447	0.980737	1
LOC100494832.S	1.52377	0.528215	3.6221	0.145831	0.884054	1
LOC100494870.L	2.86725	2.34492	3.12647	0.750021	0.453242	1
LOC100494943.L	4.90274	0.72102	3.30731	0.218008	0.827423	1
LOC100494970.S	2.06115	2.1294	3.65546	0.582527	0.560212	1
LOC100495010.S	84.2058	0.0454688	0.3325	0.136748	0.89123	0.957635
LOC100495012.L	3.60493	0.220754	3.11809	0.0707979	0.943559	1
LOC100495012.S	7.74418	1.04783	2.49771	0.419516	0.674839	1
LOC100495079.L	4.12	0.465527	2.51968	0.184756	0.85342	1
LOC100495096.1	3.36839	0.232697	1.35244	0.172057	0.863393	1
LOC100495101.S	3.12757	0.424113	2.97962	0.142338	0.886813	1
LOC100495179.L	10.3056	0.265173	1.56603	0.169328	0.865539	1
LOC100495179.S	2.35048	0.262607	3.54137	0.074154	0.940888	1
LOC100495222.1.L	10.0548	0.624411	1.92424	0.324498	0.745561	1
LOC100495284.L	1.35267	-0.802781	3.56068	-0.225457	0.821624	1
LOC100495333.S	3.57185	0.0936258	3.11935	0.0300145	0.976055	1
LOC100495347.1	2.76673	1.48669	2.76038	0.538581	0.590176	1
LOC100495360.L	2.9631	1.11221	3.51815	0.316134	0.751901	1
LOC100495379.L	4.18712	1.19526	1.97194	0.606133	0.544427	1
LOC100495541.1.L	2.21588	2.12959	3.6398	0.585084	0.558491	1
LOC100495655-like.S	3.98023	1.41055	2.94557	0.478874	0.632028	1
LOC100495801-like.L	2.56993	-0.403215	2.73009	-0.147693	0.882585	1
LOC100495841.L	2.3785	0.386916	3.10344	0.124673	0.900782	1
LOC100495874.L	6.15202	1.28723	3.1947	0.402928	0.687001	1
LOC100495886.1.S	5.73021	0.0403443	3.14801	0.0128158	0.989775	1
LOC100495895.S	47.212	0.301906	0.345208	0.874561	0.381813	0.614997
LOC100495966	1.62233	0.00545935	2.72734	0.00200171	0.998403	1
LOC100496010.S	14.4818	0.0995487	0.907381	0.10971	0.912639	1
LOC100496035.L	1.35349	-0.543127	3.64796	-0.148885	0.881644	1
LOC100496074-like.L	4.09518	0.991335	1.30966	0.756941	0.449085	1
LOC100496137-like.L	25.3416	-0.546557	0.744651	-0.733976	0.462963	0.68747
LOC100496293.L	11.9659	0.217256	2.28263	0.0951777	0.924174	1
LOC100496329.L	1.26472	-2.19432	3.81972	-0.574471	0.565649	1
LOC100496329.S	7.20017	-0.929579	1.86216	-0.499195	0.617642	1
LOC100496462.L	10.9452	-1.43531	0.827086	-1.73538	0.0826732	1
LOC100496618.L	8.09017	-0.365993	2.40383	-0.152254	0.878987	1
LOC100496658.L	17.1055	-1.05616	1.03581	-1.01965	0.307895	0.537721
LOC100496716.L	27.4167	-0.450236	0.642637	-0.700606	0.483549	0.706276
LOC100496797-like.L	93.2026	-3.17518	0.312452	-10.1622	2.92538e-24	2.06291e-22
LOC100496797.L	321.136	-2.57883	0.196839	-13.1012	3.24113e-39	5.40812e-37
LOC100496837.S	9.16408	1.67849	1.4707	1.14128	0.253753	1
LOC100496844.L	8.95411	0.619251	1.755	0.35285	0.724201	1
LOC100496853.L	1.81137	0.8543	4.17226	0.204757	0.837762	1
LOC100496870.L	5.98763	1.21152	2.00684	0.603695	0.546047	1
LOC100496873.L	8.77536	-0.0712937	1.60202	-0.0445023	0.964504	1
LOC100496891.S	4.22778	-0.276346	2.18077	-0.12672	0.899162	1
LOC100496975.L	3.89892	1.0973	3.06473	0.35804	0.720314	1
LOC100496975.S	38.083	0.41522	0.536063	0.774573	0.438592	0.667273
LOC100497020.L	11.3718	-0.787821	0.987281	-0.79797	0.424888	1
LOC100497066.L	10.8626	1.36732	4.09989	0.333501	0.738756	1
LOC100497184.L	198.647	-0.0857873	0.217324	-0.394744	0.693032	0.856003
LOC100497185.L	1.41483	0.758306	2.4814	0.305596	0.759912	1
LOC100497185.S	1.8697	2.47315	2.8411	0.87049	0.384033	1
LOC100497299.1.L	1.58287	1.6039	3.53316	0.453957	0.64986	1
LOC100497309.L	17.0592	0.633532	1.35706	0.466843	0.640612	1
LOC100497429.S	2.72739	0.430385	4.06714	0.10582	0.915725	1
LOC100497432.L	1.78886	0.101107	3.56391	0.0283697	0.977367	1
LOC100497489.S	9.38668	0.299389	1.08667	0.275509	0.782925	1
LOC100497500.S	13.0708	-0.972223	1.34453	-0.723097	0.469621	1
LOC100497501.L	3.23865	2.5544	2.64179	0.96692	0.333584	1
LOC100497556.L	15.7763	-0.668839	0.952611	-0.702112	0.482609	1
LOC100497626.L	1.5754	0.287202	3.6466	0.0787589	0.937224	1
LOC100497703.S	10.5895	2.53154	1.77496	1.42626	0.153795	1
LOC100497709.L	8.66346	0.342126	1.78705	0.191447	0.848176	1
LOC100497740.L	1.51447	-0.956467	2.2409	-0.426823	0.669509	1
LOC100497794.S	1.97358	2.14464	4.15938	0.515616	0.606123	1
LOC100497848.L	3.13719	0.656413	1.88577	0.348087	0.727775	1
LOC100497909.S	101.801	-1.43885	0.880045	-1.63497	0.102055	0.252992
LOC100497953.L	14.5754	-0.526669	1.25453	-0.419812	0.674623	1
LOC100498166.L	1.67776	0.909155	2.85081	0.318911	0.749794	1
LOC100498173.S	4.63241	0.655318	3.02107	0.216916	0.828274	1
LOC100498184.L	3.00782	0.461327	2.94507	0.156644	0.875526	1
LOC100498204.L	2.54618	0.103178	4.09386	0.025203	0.979893	1
LOC100498247.S	1.396	0.529137	3.35379	0.157773	0.874636	1
LOC100498327.L	21.1876	0.311553	0.927601	0.33587	0.736969	0.882441
LOC100498441.1.L	3.18876	0.31703	2.96238	0.107019	0.914774	1
LOC100498450.S	1.84423	-0.485511	2.10424	-0.23073	0.817525	1
LOC100498474.S	6.6878	-0.224099	2.09044	-0.107202	0.914629	1
LOC100498477.L	3.86622	1.1829	2.14545	0.551355	0.58139	1
LOC100498517.L	20.0319	-0.95105	0.601741	-1.5805	0.113993	0.273931
LOC100498590.S	2.9169	0.329198	3.1488	0.104547	0.916735	1
LOC100498594.S	2.2365	1.31337	2.87227	0.457257	0.647486	1
LOC100505442	125.736	0.419124	0.248226	1.68847	0.0913202	0.23261
LOC100505446	258.977	0.137562	0.243611	0.564679	0.572292	0.774674
LOC100653495	116.14	0.610757	0.246876	2.47394	0.0133631	0.0529917
LOC100653497	62.1841	-1.20601	0.408401	-2.95299	0.00314709	0.0161786
LOC100653500	11.8604	1.25267	0.981866	1.2758	0.202025	1
LOC100653501	8.30774	0.682795	1.87056	0.365021	0.715096	1
LOC100653508	152.934	-0.994533	0.279793	-3.55452	0.000378665	0.00261222
LOC100653509	532.408	0.56111	0.247797	2.2644	0.0235495	0.0836055
LOC101027262	5.45188	0.784108	2.91478	0.269011	0.787921	1
LOC101027264	21.5028	1.63065	0.635247	2.56695	0.0102596	0.0427903
LOC101027269	27.9249	0.524526	0.49215	1.06579	0.286521	0.512596
LOC101027274	6.82156	1.18808	3.10529	0.382597	0.702019	1
LOC101027275	1.65993	0.101273	4.19459	0.0241437	0.980738	1
LOC101027277	604.326	-0.618733	0.225002	-2.74991	0.00596124	0.0273785
LOC101027278	706.319	-1.19058	0.190953	-6.23495	4.51909e-10	9.40082e-09
LOC101027283	2.28053	-0.504325	4.13356	-0.122008	0.902893	1
LOC101027285	596.982	-0.245367	0.23199	-1.05766	0.29021	0.517438
LOC101027288	335.63	1.12645	0.21119	5.33383	9.61635e-08	1.45127e-06
LOC101027289	22.2364	0.216886	4.08993	0.0530293	0.957709	0.982974
LOC101027292	42.1398	-0.615338	0.584496	-1.05277	0.292448	0.520136
LOC101027296	0.894407	-0.112283	2.83767	-0.0395686	0.968437	1
LOC101027307	9.12883	0.410162	1.88892	0.217141	0.828099	1
LOC101027309	218.079	-1.42668	0.232994	-6.12326	9.16776e-10	1.81775e-08
LOC101243550	95.9987	-0.9432	0.33505	-2.8151	0.00487622	0.0231909
LOC101243553	24.411	0.0919701	0.876916	0.104879	0.916472	0.967428
LOC101243554	27.6667	-0.335174	0.906646	-0.369685	0.711617	0.868778
LOC101730276.L	11.5147	0.637471	1.11058	0.574001	0.565967	1
LOC101730283.S	2.38979	0.328538	4.09361	0.0802564	0.936033	1
LOC101730314.L	123.134	-0.456337	0.265235	-1.7205	0.0853422	0.22143
LOC101730464.L	19.4541	0.915584	2.69323	0.339958	NA	1
LOC101730467.L	1.6384	-2.76667	4.25534	-0.650165	0.515586	1
LOC101730503.L	1.48877	0.712471	2.65134	0.268721	0.788144	1
LOC101730584	1.89409	-1.96023	3.50628	-0.559063	0.576119	1
LOC101730652.S	6.13658	-1.08393	1.49769	-0.723733	0.46923	1
LOC101730692.L	9.7257	1.46549	1.38812	1.05574	0.291088	1
LOC101730710.L	2.40124	-0.371562	2.48698	-0.149403	0.881236	1
LOC101730711.S	23.8604	0.0896403	0.488471	0.183512	0.854396	0.941181
LOC101730741.L	4.98688	-0.305608	2.06273	-0.148157	0.882219	1
LOC101730756.S	2.76602	1.24681	3.00056	0.415525	0.677757	1
LOC101730771-like.L	11.3012	1.25352	2.202	0.569264	0.569177	1
LOC101730771-like.S	3.42072	1.77381	3.45513	0.513384	0.607683	1
LOC101730807.L	9.13302	0.707568	2.04039	0.34678	0.728756	1
LOC101730829.L	2.38397	-1.14239	4.12336	-0.277052	0.78174	1
LOC101730888-like.L	4.33767	0.411766	2.83234	0.14538	0.884411	1
LOC101730911.S	5.8664	-0.316243	3.41633	-0.0925679	0.926247	1
LOC101730997.L	2.30332	-0.607887	2.24526	-0.270743	0.786589	1
LOC101730999.S	3.35695	0.977201	2.46369	0.396641	0.691632	1
LOC101731079.L	6.88665	1.30766	2.03278	0.643284	0.52004	1
LOC101731168.L	5.58304	0.242613	3.65987	0.0662901	0.947147	1
LOC101731180.S	1.69127	-2.62782	3.28409	-0.800167	0.423614	1
LOC101731218.L	3.24313	2.08017	2.66777	0.779741	0.435543	1
LOC101731218.S	29.0383	0.436464	0.520866	0.837959	0.402054	0.634415		X
LOC101731372.S	8.40743	0.689442	2.00916	0.34315	0.731485	1
LOC101731405.L	17.0575	-1.04768	0.679388	-1.54209	0.123052	1
LOC101731405.S	8.71573	-0.186333	1.30634	-0.142638	0.886576	1
LOC101731429.L	1.59693	2.12918	3.67451	0.579444	0.56229	1
LOC101731434.L	2.26153	0.697388	4.13802	0.168532	0.866165	1
LOC101731454.L	3.28299	0.391542	1.93987	0.20184	0.840042	1
LOC101731502.L	3.57424	0.234286	2.50809	0.0934118	0.925576	1
LOC101731502.S	3.59957	0.275361	3.92402	0.0701732	0.944056	1
LOC101731543-like.S	4.09067	-0.749161	3.31432	-0.226038	0.821172	1
LOC101731554.S	1.64587	0.102248	4.16593	0.024544	0.980419	1
LOC101731617.L	7.41161	1.06967	1.63097	0.65585	0.511921	1
LOC101731617.S	6.8917	0.0942549	1.67642	0.056224	0.955163	1
LOC101731668.S	7.81315	-0.182079	2.61257	-0.0696933	0.944438	1
LOC101731680.S	1.58452	1.37697	3.61715	0.380677	0.703443	1
LOC101731692.S	6.32689	0.395617	2.55168	0.155042	0.876788	1
LOC101731719.S	3.49693	-0.579952	2.79891	-0.207206	0.835849	1
LOC101731735.L	12.4238	-0.957858	0.783295	-1.22286	0.221383	1
LOC101731735.S	24.2249	-0.892065	0.58493	-1.52508	0.127239	0.29659
LOC101731753.L	4.0007	-0.942208	2.19918	-0.428436	0.668334	1
LOC101731778.L	1.39471	-0.645781	2.87217	-0.224841	0.822103	1
LOC101731794.L	4.29594	-1.24974	2.5029	-0.499317	0.617556	1
LOC101731854.L	5.92034	-0.13076	2.22049	-0.0588877	0.953042	1
LOC101731916.L	1.9288	1.7327	3.73457	0.463962	0.642675	1
LOC101731950.L	3.63534	-0.350851	3.39863	-0.103233	0.917778	1
LOC101731963.L	6.52818	-0.10051	2.0497	-0.0490367	0.96089	1
LOC101731968.1.L	8.63319	0.54189	2.61816	0.206973	0.836031	1
LOC101731968.S	1.98182	0.704035	4.19191	0.167951	0.866622	1
LOC101732121.S	2.91631	-0.22016	2.92706	-0.0752155	0.940043	1
LOC101732152.S	2.69927	0.328558	4.06601	0.080806	0.935596	1
LOC101732167.L	3.84769	0.868606	3.41061	0.254677	0.798972	1
LOC101732168.S	3.15595	1.3872	1.80152	0.770013	0.441292	1
LOC101732174.L	5.18358	-0.395827	2.05927	-0.192217	0.847572	1
LOC101732183.L	13.654	-0.21931	0.772992	-0.283716	0.776628	1
LOC101732265-like.L	2.41002	0.276298	2.56205	0.107843	0.914121	1
LOC101732299.L	11.7811	0.0286889	0.989028	0.0290071	0.976859	1
LOC101732303.L	1.52049	-0.50329	4.2228	-0.119184	0.90513	1
LOC101732334	6.52137	0.653739	2.04581	0.31955	0.74931	1
LOC101732336.L	6.95105	-0.731049	0.975238	-0.74961	0.45349	1
LOC101732363.S	11.0015	-0.136842	0.871156	-0.157081	0.875181	1
LOC101732392.L	3.12686	-0.907574	2.54939	-0.355996	0.721843	1
LOC101732415.L	2.09932	-0.65018	4.17121	-0.155873	0.876133	1
LOC101732478.S	4.8525	1.193	3.26365	0.365541	0.714708	1
LOC101732545.L	2.09602	0.102832	4.14877	0.0247862	0.980225	1
LOC101732646	18.2269	0.117705	0.572386	0.205639	0.837073	0.932205
LOC101732656.L	3.93099	-1.35745	3.39273	-0.400107	0.689078	1
LOC101732657.1.S	2.23128	-1.30326	2.47294	-0.52701	0.598186	1
LOC101732657.L	2.36481	0.0476663	3.10638	0.0153446	0.987757	1
LOC101732678.L	4.03896	-0.0497393	3.85959	-0.0128872	0.989718	1
LOC101732737.L	5.62436	-0.198566	3.19296	-0.0621888	0.950413	1
LOC101732752.S	5.00881	0.752598	2.60183	0.289257	0.772385	1
LOC101732807.L	120.767	-0.832103	0.252397	-3.29681	0.000977898	0.00598098
LOC101732820.L	3.2901	0.275351	3.96148	0.069507	0.944586	1
LOC101732837.L	10.7059	0.143015	1.2854	0.111261	0.91141	1
LOC101732880.S	6.04429	-0.977671	1.33326	-0.733295	0.463379	1
LOC101732886.L	11.3027	0.783297	2.24886	0.348309	0.727608	1
LOC101732896.L	2.4216	0.116641	3.14591	0.0370769	0.970424	1
LOC101732896.S	3.12624	-0.262971	3.99034	-0.0659021	0.947456	1
LOC101732913.L	3.64149	0.583818	3.3956	0.171934	0.86349	1
LOC101732945.L	37.207	0.926496	1.53922	0.601924	0.547225	0.756662
LOC101732960.S	1.38236	-1.91229	3.06037	-0.624858	0.532064	1
LOC101732961.L	1.74949	-0.289591	2.68018	-0.108049	0.913957	1
LOC101732999.S	5.44644	0.74536	3.13169	0.238006	0.811877	1
LOC101733006.L	3.95211	1.82661	3.85604	0.473702	0.635713	1
LOC101733023.S	6.35259	0.830658	2.14939	0.386461	0.699155	1
LOC101733058.L	2.784	0.101236	3.61073	0.0280374	0.977632	1
LOC101733073.L	3.82287	0.477271	3.40392	0.140212	0.888492	1
LOC101733100.L	5.5273	-0.817157	3.20702	-0.254803	0.798876	1
LOC101733142.L	5.66826	0.546029	2.04735	0.2667	0.7897	1
LOC101733157.L	6.05606	0.817906	1.59976	0.511266	0.609165	1
LOC101733178.L	28.012	0.164177	0.588033	0.279197	0.780094	0.904106
LOC101733219.L	4.07998	-0.617049	2.67716	-0.230487	0.817714	1
LOC101733219.S	2.18226	0.367527	3.0677	0.119805	0.904637	1
LOC101733221.L	8.97006	1.0451	1.74229	0.599841	0.548612	1
LOC101733232.S	8.73965	-1.46061	0.959877	-1.52166	0.128095	1
LOC101733276.L	2.97922	-1.10121	3.42455	-0.321564	0.747783	1
LOC101733340.1.L	4.35753	0.876741	2.89287	0.303069	0.761837	1
LOC101733340.S	5.82993	-0.109415	3.14589	-0.0347804	0.972255	1
LOC101733353.L	2.288	1.45771	4.14172	0.351958	0.72487	1
LOC101733361.L	2.20947	-0.499188	2.2394	-0.222911	0.823605	1
LOC101733386.L	1.34408	1.53186	3.3039	0.463651	0.642898	1
LOC101733399.1.L	4.64055	-2.48646	1.84753	-1.34583	0.178356	1
LOC101733436.L	1.20391	0.00904035	2.93009	0.00308535	0.997538	1
LOC101733491.L	4.3939	-0.773033	2.85849	-0.270434	0.786826	1
LOC101733491.S	4.11835	0.541248	2.75415	0.196521	0.844203	1
LOC101733496-like.L	64.226	-0.577762	0.345799	-1.67081	0.09476	0.239212
LOC101733559.L	92.8664	-0.889704	0.286568	-3.10469	0.0019048	0.0106094
LOC101733560.1.S	595.272	0.36403	1.55033	0.234809	NA	1
LOC101733570.S	1.29132	1.12181	2.1865	0.513061	0.607909	1
LOC101733572.S	11.0312	1.44358	1.09381	1.31977	0.186911	1
LOC101733597.1.S	8.17074	0.886424	1.57631	0.56234	0.573885	1
LOC101733619.S	2.84757	-0.215978	3.4125	-0.0632904	0.949535	1
LOC101733718-like.L	4.85888	1.39448	1.45291	0.959786	0.337163	1
LOC101733732.L	1.957	-0.322775	4.17995	-0.0772198	0.938449	1
LOC101733745.L	2.76365	-0.826609	3.53649	-0.233737	0.815189	1
LOC101733806.L	2.67969	-0.727758	2.997	-0.242829	0.808138	1
LOC101733839.L	1.86469	1.12579	3.69053	0.305049	0.760329	1
LOC101733845.L	3.66975	1.4527	3.20906	0.452686	0.650775	1
LOC101733845.S	10.5392	1.2714	2.08668	0.609293	0.54233	1
LOC101733888.L	7.68986	0.127508	2.02209	0.0630577	0.949721	1
LOC101733890.L	3.4746	0.103034	3.94521	0.0261161	0.979165	1
LOC101733911.L	19.952	-0.197412	1.47117	-0.134187	0.893254	0.958376
LOC101733911.S	30.6019	-0.356501	1.57268	-0.226684	0.820669	0.923948
LOC101734037.S	2.82773	-0.0208122	3.18246	-0.00653967	0.994782	1
LOC101734090.L	7.22855	1.03564	2.87433	0.360306	0.718619	1
LOC101734106.S	1.53332	0.0493481	4.259	0.0115868	0.990755	1
LOC101734116.1.L	5.92641	-1.43658	1.75983	-0.816317	0.414319	1
LOC101734172.L	8.10433	0.455532	1.91083	0.238394	0.811575	1
LOC101734194.L	3.55468	0.242197	2.5331	0.0956127	0.923828	1
LOC101734280.L	14.3215	-0.97675	0.854925	-1.1425	0.253247	1
LOC101734280.S	9.85944	-0.871102	1.19131	-0.731214	0.464649	1
LOC101734284-like.L	5.07625	0.923126	1.48335	0.622325	0.533728	1
LOC101734409.S	6.9377	0.361869	2.5144	0.143919	0.885565	1
LOC101734474.S	1.68502	-0.801944	1.7672	-0.453794	0.649977	1
LOC101734516.L	16.2684	0.335513	0.655545	0.511807	0.608786	1
LOC101734522.1	6.62224	-0.0176679	1.75272	-0.0100803	0.991957	1
LOC101734545	8.82464	0.353587	3.99448	0.0885189	0.929464	1
LOC101734588.L	6.52017	0.0276984	2.41035	0.0114915	0.990831	1
LOC101734593.L	3.01621	1.11574	4.0022	0.278782	0.780412	1
LOC101734593.S	1.47872	-0.225205	4.14981	-0.0542687	0.956721	1
LOC101734605.L	39.3707	-0.0417322	0.375656	-0.111091	0.911544	0.965263
LOC101734608.L	2.45615	0.322678	2.59855	0.124176	0.901176	1
LOC101734609.L	3.10048	1.26662	3.48867	0.363066	0.716555	1
LOC101734609.S	2.98339	0.263523	3.38249	0.0779077	0.937901	1
LOC101734643.L	6.03447	-0.311693	1.70168	-0.183167	0.854667	1	X
LOC101734660.L	2.3804	0.929383	3.20514	0.289966	0.771842	1
LOC101734679.L	3.52064	-0.15072	3.44892	-0.0437007	0.965143	1
LOC101734771.L	1.56682	1.92305	3.33647	0.576373	0.564363	1
LOC101734788.S	3.05726	0.0930829	3.03952	0.0306242	0.975569	1
LOC101734852.S	1.24641	3.2342	3.46682	0.932901	0.350871	1
LOC101734868.L	2.78069	2.88654	2.93627	0.983065	0.325575	1
LOC101734868.S	5.29773	0.453902	2.57565	0.176228	0.860115	1
LOC101734895.1	1.64321	-0.643634	3.19555	-0.201416	0.840373	1
LOC101734975.L	1.82708	0.703868	4.21834	0.166859	0.867481	1
LOC101734975.S	2.53144	1.72275	3.49019	0.493597	0.621591	1
LOC101734998.L	2.65621	-1.66264	4.06206	-0.409311	0.682311	1
LOC101734999.S	86.4712	-0.721588	0.365841	-1.97241	0.0485628	0.145009
LOC101735002.S	2.51535	0.278708	2.85108	0.0977551	0.922127	1
LOC101735009.S	45.5705	1.06906	0.491434	2.1754	0.0296004	0.0996804
LOC101735010.S	3.46245	-0.866754	2.09823	-0.413088	0.679542	1
LOC101735011.L	2.15711	-0.617286	3.59248	-0.171827	0.863573	1
LOC101735056.L	36.6619	0.422801	0.637971	0.662728	0.507505	0.725698
LOC101735082.S	4.39705	-0.569525	2.9833	-0.190904	0.848601	1
LOC101735116.L	2.00369	-1.14124	3.08815	-0.369555	0.711714	1
LOC101735121-like.L	41.4887	-0.449404	0.473749	-0.948612	0.342818	0.575508
LOC101735124-like.S	12.2564	-0.0468472	0.957703	-0.0489162	0.960986	1
LOC101735245.L	4.07522	-0.661663	3.37168	-0.196241	0.844421	1
LOC101735282.L	3.88514	-0.319667	1.74516	-0.183173	0.854662	1
LOC101735289.L	5.4796	0.850111	3.65373	0.232669	0.816018	1
LOC101735296.L	1.24146	3.55352	4.2874	0.82883	0.407201	1
LOC105945196.S	6.72032	-0.695175	2.26597	-0.306789	0.759004	1
LOC105945384.S	2.93719	-0.74191	2.31226	-0.320859	0.748317	1
LOC105945417.L	30.2889	-0.746949	0.717916	-1.04044	0.298135	0.526497
LOC105945479	2.68665	0.220306	3.28954	0.0669717	0.946604	1
LOC105945545.L	5.94751	0.446838	1.5717	0.284303	0.776179	1
LOC105945779	4.1263	-0.451546	2.78561	-0.162099	0.871228	1
LOC105945780.L	32.8065	0.191995	0.953546	0.201349	0.840426	0.93357
LOC105945786.L	5.92327	0.896742	2.90213	0.308994	0.757326	1
LOC105945872.L	6.07786	-0.368452	2.3349	-0.157802	0.874613	1
LOC105945929.L	3.80299	-0.295996	3.41391	-0.086703	0.930908	1
LOC105946022.S	25.677	0.143383	1.08221	0.132491	0.894596	0.959251
LOC105946344.L	10.3085	1.26926	2.40282	0.528237	0.597335	1
LOC105946425.L	4.65031	0.888393	2.76416	0.321397	0.74791	1
LOC105946653.L	1.52343	3.41153	4.20778	0.810768	0.417499	1
LOC105946688.L	42.1392	-4.09778	0.55249	-7.41694	1.19855e-13	3.70737e-12
LOC105946688.S	5.33022	-2.15154	1.62861	-1.32109	0.186472	1
LOC105946711.L	3.83506	-0.892369	3.41688	-0.261165	0.793966	1
LOC105946830.L	8.68573	0.431555	2.33807	0.184578	0.85356	1
LOC105946874.L	2.68298	-0.0844224	1.90423	-0.0443343	0.964638	1
LOC105946897.L	13.5207	0.79263	3.04179	0.26058	0.794416	1
LOC105946907.L	4.73173	1.92578	2.86005	0.673338	0.500733	1
LOC105946937.L	5.61136	2.2237	2.90491	0.765498	0.443975	1
LOC105947003.L	12.9785	0.141682	1.34112	0.105645	0.915864	1
LOC105947173.L	7.44063	0.0876453	2.71527	0.0322786	0.97425	1
LOC105947229.L	10.0249	0.60815	1.60316	0.379345	0.704432	1
LOC105947339.L	1.70235	-2.54785	2.46275	-1.03455	0.300877	1
LOC105947410.L	38.4949	-1.30296	0.506697	-2.57148	0.0101263	0.0423387
LOC105947422.S	1.69841	-3.25927	3.05762	-1.06595	0.286447	1
LOC105947450.S	50.6365	-0.675208	0.338838	-1.99272	0.0462924	0.139673
LOC105947595.L	7.25835	-0.354387	2.64135	-0.134169	0.893269	1
LOC105947790.L	13.0058	2.35065	1.29813	1.8108	0.070172	1
LOC105947790.S	2.87554	1.84538	2.08316	0.885857	0.375695	1
LOC105947835.S	4.1594	0.0586142	2.28679	0.0256316	0.979551	1
LOC105947871.L	21.3428	1.08132	0.578728	1.86844	0.0617013	0.173782
LOC105948127	5.91965	-0.764848	1.89496	-0.403623	0.68649	1
LOC105948388.L	2.60299	-0.515643	3.24163	-0.159069	0.873614	1
LOC105948534	2.60481	-0.645123	2.67574	-0.241101	0.809477	1
LOC105948557.L	2.79556	0.403621	2.21376	0.182324	0.855329	1
LOC108695208	2.64815	0.713964	3.0825	0.231619	0.816834	1
LOC108695213	5.12756	-3.48931	2.0543	-1.69854	0.0894058	1
LOC108695214	4.02253	1.53218	1.79204	0.854992	0.392556	1
LOC108695215	4.59917	1.96051	2.80444	0.699075	0.484505	1
LOC108695216	2.0951	0.0138804	2.58396	0.00537174	0.995714	1
LOC108695217	37.0879	0.849735	0.425486	1.99709	0.0458151	0.138529
LOC108695218	3.12795	-1.10487	2.37818	-0.464587	0.642227	1
LOC108695220	5.20739	0.33016	2.13795	0.154428	0.877272	1
LOC108695221	35.6177	-1.15353	0.590711	-1.95277	0.0508463	0.150275
LOC108695222	1.70271	-4.26594	4.1296	-1.03302	0.301596	1
LOC108695223	7.57103	0.570261	1.52812	0.373179	0.709015	1
LOC108695227	216.825	-1.97554	0.257042	-7.68564	1.5223e-14	5.19733e-13
LOC108695228	1.94903	0.877339	2.07327	0.423167	0.672173	1
LOC108695232	93.505	0.011604	0.363195	0.0319498	0.974512	0.990396
LOC108695237	34.8896	-0.707533	0.404415	-1.74952	0.0802011	0.211542
LOC108695239	9.59285	-0.202589	0.848833	-0.238668	0.811363	1
LOC108695240	104.032	-0.387044	0.310369	-1.24704	0.212382	0.419971
LOC108695241	2.90636	1.57464	3.47021	0.45376	0.650001	1
LOC108695243	3.24628	0.306381	2.15491	0.142178	0.886939	1
LOC108695244	5.61177	0.885573	1.58613	0.558323	0.576624	1
LOC108695246	2.59673	0.685845	2.40864	0.284743	0.775841	1
LOC108695247	247.022	0.177068	0.194017	0.912641	0.361432	0.594317
LOC108695251	85.0951	-1.96003	0.362596	-5.40555	6.46106e-08	9.97968e-07
LOC108695252	271.225	-0.200563	0.215885	-0.929024	0.352877	0.586042
LOC108695254	10.1289	-0.470842	1.24716	-0.377532	0.705778	1
LOC108695255	2.14238	3.41115	4.16606	0.818794	0.412904	1
LOC108695257	1.38171	-0.206776	2.40641	-0.085927	0.931524	1
LOC108695258	18.5252	0.260929	1.27205	0.205124	0.837475	0.932605
LOC108695259	189.799	0.763793	0.173405	4.40469	1.05935e-05	0.000108237
LOC108695260	264.323	0.890478	0.267369	3.33052	0.000866846	0.00539124
LOC108695261	172.337	0.163631	0.181223	0.90293	0.366563	0.599822
LOC108695263	58.51	-1.05483	0.638183	-1.65287	0.0983574	0.245935
LOC108695265	4.77446	-0.305263	1.69126	-0.180495	0.856764	1
LOC108695267	3.11784	1.1123	3.49912	0.31788	0.750576	1
LOC108695270	331.899	0.363235	0.24768	1.46655	0.142498	0.321466
LOC108695271	20.0968	0.786272	0.663455	1.18512	0.235971	0.451312
LOC108695273	11.6261	1.26671	1.94548	0.651102	0.514981	1
LOC108695274	10.9883	0.313623	2.12189	0.147804	0.882498	1
LOC108695278	37.936	1.44805	0.501277	2.88873	0.00386798	0.0191732
LOC108695279	4.93073	2.49181	2.21893	1.12298	0.261447	1
LOC108695284	7.59592	0.379791	2.41476	0.157279	0.875025	1
LOC108695285	176.815	1.17324	0.175353	6.69073	2.22061e-11	5.41865e-10
LOC108695286	1.66147	-0.331987	3.21163	-0.10337	0.917669	1
LOC108695287	2.09921	2.05656	3.08443	0.666755	0.504929	1
LOC108695290	4.05107	-0.90753	1.70146	-0.533384	0.593768	1
LOC108695294	15.243	-0.332686	0.739829	-0.44968	0.652941	1
LOC108695296	3.71251	2.51951	2.94315	0.85606	0.391965	1
LOC108695304	5.66509	1.42931	2.75171	0.519426	0.603464	1
LOC108695305	8.28933	0.150937	2.26855	0.0665344	0.946952	1
LOC108695306	1.10402	3.11412	3.74784	0.83091	0.406024	1
LOC108695307	188.577	-0.286388	0.210632	-1.35966	0.173937	0.36784
LOC108695308	18.134	0.780973	0.798366	0.978215	0.327968	0.559862
LOC108695309	52.663	0.409056	0.660307	0.619493	0.535592	0.748249
LOC108695312	574.502	0.0645934	0.284323	0.227183	0.820281	0.923928
LOC108695316	68.0275	0.0189341	0.38051	0.0497599	0.960314	0.984326
LOC108695319	2.86677	-0.22719	3.72899	-0.0609253	0.951419	1
LOC108695321	3.33039	-0.690099	2.98013	-0.231567	0.816874	1
LOC108695328	2.54689	4.19385	2.27636	1.84235	0.0654237	1
LOC108695329	447.15	-0.259966	0.207323	-1.25392	0.209871	0.416613
LOC108695330	3.30767	-0.526371	1.69672	-0.310228	0.756387	1
LOC108695331	85.914	-2.20757	0.469543	-4.70152	2.58232e-06	3.0215e-05
LOC108695332	489.6	-4.32173	0.295209	-14.6395	1.57164e-48	4.04765e-46
LOC108695335	2.60994	0.0694054	1.85564	0.0374024	0.970164	1
LOC108695339	2.58012	1.54233	4.08394	0.377658	0.705685	1
LOC108695341	2.37184	3.89154	2.85922	1.36105	0.173498	1
LOC108695342	9.81582	0.871191	2.31261	0.376713	0.706387	1
LOC108695343	39.0159	0.747741	0.341302	2.19085	0.0284627	0.0966599
LOC108695344	10.1866	1.25521	1.28197	0.979122	0.32752	1
LOC108695345	3088.32	0.650177	0.22172	2.93242	0.00336337	0.0171159
LOC108695346	2.76547	1.15777	2.76698	0.418422	0.675639	1
LOC108695348	18.0732	0.712531	2.49275	0.285842	0.774999	0.901812
LOC108695349	299.302	-0.0941115	0.174075	-0.540639	0.588757	0.786405
LOC108695356	21.0249	1.01237	1.17272	0.863267	0.387991	0.621152
LOC108695358	5.35431	-1.49191	1.81462	-0.822162	0.410985	1
LOC108695359	62.2753	0.200106	0.332232	0.602309	0.546969	0.756475
LOC108695360	181.024	0.120699	0.212725	0.567396	0.570445	0.773363	X
LOC108695362	7.33242	0.817339	2.64296	0.309252	0.75713	1
LOC108695365	1.87993	1.11192	3.57742	0.310816	0.75594	1
LOC108695366	7.65957	0.933648	3.20248	0.291539	0.770639	1
LOC108695367	2.63956	0.940169	3.54241	0.265404	0.790699	1
LOC108695370	50.4787	-0.0101386	0.36932	-0.027452	0.978099	0.991693
LOC108695373	62.5452	0.323633	0.409881	0.789578	0.429774	0.660252
LOC108695374	190.122	-0.775048	0.217659	-3.56083	0.00036968	0.00255967
LOC108695380	17.7488	-1.83193	0.755768	-2.42394	0.0153533	0.0591708
LOC108695382	226.351	-0.207512	0.221634	-0.936283	0.349127	0.582282
LOC108695383	2.55529	0.790273	4.07778	0.1938	0.846333	1
LOC108695386	9.80197	0.519143	1.5389	0.337348	0.735855	1
LOC108695387	9.44207	0.888783	1.11478	0.797271	0.425294	1
LOC108695393	1151.47	-0.898211	0.301581	-2.97834	0.00289812	0.0151318
LOC108695395	2.26798	0.045841	2.84053	0.0161382	0.987124	1
LOC108695396	30.7119	0.093481	0.539658	0.173223	0.862476	0.944951	X
LOC108695398	27.4216	1.12468	1.23272	0.912361	0.361579	0.594329
LOC108695400	6.24279	0.229447	2.91295	0.0787681	0.937217	1
LOC108695401	2.63883	1.29907	2.93609	0.44245	0.658164	1
LOC108695404	31.8285	0.901414	0.550454	1.63758	0.101508	0.251979
LOC108695405	12.0951	-0.0562059	1.70165	-0.0330303	0.97365	1
LOC108695411	4.44388	1.12861	2.99532	0.376792	0.706328	1
LOC108695413	33.3568	-3.42342	0.529505	-6.46532	1.01085e-10	2.2876e-09
LOC108695414	4.59726	-0.0282152	1.71931	-0.0164107	0.986907	1
LOC108695416	3.32173	2.13377	1.71964	1.24083	0.21467	1
LOC108695417	35.7085	0.264074	0.427775	0.617319	0.537024	0.749077		X
LOC108695419	207.074	-0.322686	0.20844	-1.5481	0.121599	0.287227
LOC108695420	21.6312	-0.665077	1.31864	-0.504365	0.614005	0.805701
LOC108695421	2.26804	-0.839988	3.17047	-0.264941	0.791055	1
LOC108695426	14.4671	-0.645168	1.41574	-0.455711	0.648598	1
LOC108695427	81.9516	-0.534755	0.29206	-1.83097	0.0671043	0.185031
LOC108695428	2.36675	-3.36479	3.17958	-1.05825	0.289942	1
LOC108695434	91.2954	0.314848	0.244797	1.28616	0.198387	0.401625
LOC108695435	77.9573	0.34739	0.253358	1.37115	0.17033	0.362768
LOC108695436	4.91515	0.903642	3.3055	0.273375	0.784565	1
LOC108695437	5.70286	-4.74246	1.76297	-2.69005	0.00714423	1
LOC108695438	88.4622	0.437843	0.29539	1.48225	0.138273	0.314841
LOC108695440	718.068	-0.512362	0.220063	-2.32826	0.0198985	0.0730629
LOC108695447	6.55887	1.23021	3.11454	0.39499	0.69285	1
LOC108695448	1.22114	-0.764706	3.27412	-0.233561	0.815326	1
LOC108695449	6.90827	-1.49456	1.0353	-1.44361	0.14885	1
LOC108695450	19.5023	0.656315	1.45436	0.451274	0.651792	0.830032
LOC108695452	1.5019	0.854291	4.17226	0.204755	0.837764	1
LOC108695453	114.346	0.438584	0.245887	1.78369	0.0744748	0.200023
LOC108695457	38.3038	-0.145797	0.414227	-0.351973	0.724859	0.876131
LOC108695458	84.4938	1.56264	0.29604	5.27846	1.30274e-07	1.9316e-06
LOC108695459	211.213	0.936007	0.232785	4.02091	5.79745e-05	0.000498913
LOC108695462	10.6003	0.553383	1.34943	0.410087	0.681742	1
LOC108695463	221.976	-0.287268	0.229834	-1.2499	0.211337	0.418437
LOC108695464	20.0431	-0.443725	2.14476	-0.206888	0.836097	0.931629
LOC108695465	57.6935	-4.45074	0.655056	-6.79443	1.08738e-11	2.75555e-10		X
LOC108695467	8.98125	-0.572699	2.43859	-0.234849	0.814326	1
LOC108695468	2.61093	1.59278	3.47272	0.458655	0.646482	1
LOC108695469	3.2526	0.93377	1.84817	0.505242	0.613389	1
LOC108695470	2.51794	-0.780222	3.2887	-0.237244	0.812468	1
LOC108695472	7.16558	0.479236	2.08859	0.229454	0.818516	1
LOC108695473	12.2518	0.645109	1.66892	0.386543	0.699094	1
LOC108695474	90.6856	0.195097	0.307008	0.635478	0.525116	0.740029
LOC108695475	5.26331	-0.741043	2.87783	-0.257501	0.796792	1
LOC108695477	1.85296	2.95052	3.61165	0.816946	0.413959	1
LOC108695484	19.4046	-0.954201	1.35718	-0.703077	0.482008	0.70476
LOC108695486	3.42359	0.313227	2.4951	0.125537	0.900098	1
LOC108695487	30.3838	0.499237	0.721104	0.692323	0.488735	0.710435
LOC108695489	7.75059	1.08959	2.50848	0.434361	0.664026	1
LOC108695490	5.27629	1.11375	2.99568	0.371785	0.710053	1
LOC108695491	4.94227	-1.20906	1.49958	-0.806263	0.420092	1
LOC108695492	204.961	-0.981835	0.216213	-4.54105	5.59752e-06	6.10906e-05
LOC108695493	33.0513	-0.247049	1.60668	-0.153763	0.877796	0.951619
LOC108695494	31.0161	0.63624	0.632341	1.00617	0.314336	0.544634
LOC108695496	7.18748	0.255895	1.81907	0.140674	0.888128	1
LOC108695497	3.75925	-0.317228	3.90277	-0.0812827	0.935217	1
LOC108695498	14.7208	-0.452006	0.949852	-0.475869	0.634167	1
LOC108695500	14.2321	0.450172	1.42293	0.316369	0.751722	1
LOC108695501	28.1864	0.397859	0.505897	0.786442	0.431609	0.661625
LOC108695502	175.839	0.553938	0.26685	2.07584	0.0379086	0.120129
LOC108695503	86.735	-0.385608	0.254251	-1.51664	0.129357	0.299959
LOC108695504	37.4472	-0.325395	0.641976	-0.506865	0.612249	0.804717
LOC108695505	88.5553	0.0895436	0.358282	0.249925	0.802645	0.916171		X
LOC108695506	48.9862	-0.230662	0.510183	-0.452116	0.651185	0.829615
LOC108695507	7.98729	0.419886	2.65616	0.15808	0.874394	1
LOC108695509	45.0653	-0.396245	0.32205	-1.23038	0.218553	0.42796
LOC108695511	46.0025	0.519573	0.392345	1.32428	0.185411	0.383177
LOC108695512	84.0595	0.274874	0.278226	0.987949	0.323178	0.554239
LOC108695513	17.0214	0.91997	1.36718	0.672895	0.501014	1
LOC108695514	9.14163	2.09779	2.10693	0.995659	0.319416	1
LOC108695515	87.4238	0.775988	0.351565	2.20724	0.0272975	0.0934529
LOC108695517	61.7253	0.17739	0.278184	0.637671	0.523688	0.738939
LOC108695518	110.105	-0.147328	0.220179	-0.66913	0.503413	0.7222
LOC108695519	62.472	0.326933	0.268318	1.21845	0.223053	0.43448
LOC108695520	68.8136	0.35033	0.328969	1.06493	0.286907	0.513015
LOC108695521	57.093	0.575923	0.405839	1.41909	0.155873	0.341735
LOC108695522	29.8681	0.0363242	0.716923	0.0506668	0.959591	0.983854
LOC108695524	4.0305	2.22097	2.8341	0.783661	0.433239	1
LOC108695525	76.9832	-0.0230274	0.255508	-0.0901239	0.928189	0.971486
LOC108695526	55.3099	0.117186	0.468837	0.249951	0.802625	0.916171
LOC108695527	385.184	0.136517	0.232974	0.585977	0.557891	0.764706
LOC108695528	34.3273	1.10187	0.511084	2.15594	0.0310884	0.103369
LOC108695529	26.3071	0.524259	0.778383	0.673523	0.500614	0.720192
LOC108695530	21.3779	-0.0559055	1.30872	-0.0427176	0.965927	0.986792
LOC108695531	4.89197	0.442191	3.31034	0.133579	0.893736	1
LOC108695532	56.2425	0.455009	0.385098	1.18154	0.237387	0.452944
LOC108695533	10.3883	0.794969	1.34655	0.590374	0.55494	1
LOC108695534	8.42111	0.126471	1.41167	0.0895899	0.928613	1
LOC108695535	75.4761	0.124051	0.339489	0.365404	0.71481	0.870394
LOC108695536	60.3896	-0.214779	0.417712	-0.514179	0.607127	0.800521
LOC108695537	71.3489	0.275802	0.366197	0.753153	0.451358	0.677938
LOC108695538	51.9325	0.255378	0.336379	0.759199	0.447734	0.674976
LOC108695539	82.3918	0.207171	0.283038	0.731954	0.464197	0.688516
LOC108695540	17.6822	0.155865	1.22357	0.127385	0.898636	0.960194
LOC108695541	14.042	0.728941	0.954629	0.763585	0.445114	1
LOC108695543	16.0308	0.42454	1.03108	0.411743	0.680528	1
LOC108695544	47.0287	0.258246	0.501064	0.515395	0.606277	0.800025
LOC108695545	2.71168	0.595404	4.06876	0.146336	0.883657	1
LOC108695546	5.62669	0.349321	1.22454	0.285268	0.775439	1
LOC108695547	7.46027	-0.21746	1.31093	-0.165882	0.86825	1
LOC108695548	77.1731	0.445215	0.308055	1.44524	0.148389	0.329993
LOC108695549	31.1982	-1.07302	0.554567	-1.93487	0.0530058	0.154765
LOC108695550	4.10701	-1.13927	1.81155	-0.62889	0.529421	1
LOC108695551	22.2813	-0.447633	1.01851	-0.439499	0.6603	0.835834
LOC108695552	32.9389	0.163926	1.57694	0.103952	0.917207	0.967665
LOC108695554	23.1098	1.05059	0.531547	1.97647	0.0481013	0.143921
LOC108695555	8.69864	0.402176	1.36713	0.294175	0.768624	1
LOC108695556	23.0855	-0.234321	0.582851	-0.402026	0.687665	0.852555
LOC108695557	47.5065	0.164357	0.337057	0.487624	0.625816	0.813344
LOC108695558	2.08361	-0.163886	4.14293	-0.0395581	0.968445	1
LOC108695559	7.99329	-1.27743	1.41786	-0.900956	0.367611	1
LOC108695560	2.21853	0.975523	1.90244	0.512774	0.608109	1
LOC108695561	56.3974	0.595429	0.475208	1.25299	0.210211	0.417042
LOC108695562	26.0682	-0.324979	0.537772	-0.604306	0.54564	0.755472
LOC108695563	81.9332	1.0282	0.359895	2.85696	0.00427718	0.020814
LOC108695564	31.8473	-0.0332752	0.574946	-0.0578753	0.953848	0.981989
LOC108695565	32.1292	0.696264	0.44081	1.57951	0.114219	0.274333
LOC108695566	0.960117	2.35572	2.8526	0.825816	0.408908	1
LOC108695567	24.917	0.988169	0.637664	1.54967	0.121221	0.286704
LOC108695568	112.78	-0.0464955	0.252034	-0.184481	0.853636	0.940916
LOC108695569	12.4905	0.280757	1.26174	0.222516	0.823912	1
LOC108695570	224.626	0.732132	0.178942	4.09144	4.28694e-05	0.000381287
LOC108695571	5.91344	-0.422537	1.94744	-0.216971	0.828231	1
LOC108695572	34.4544	-3.96698	2.17492	-1.82397	0.0681565	0.186975
LOC108695573	8.31228	-0.690639	1.19271	-0.57905	0.562555	1
LOC108695574	149.308	-0.21505	0.201804	-1.06564	0.286588	0.512678
LOC108695575	101.621	1.25998	0.481197	2.61844	0.00883339	0.0377863
LOC108695576	303.988	1.57182	0.328738	4.78137	1.74107e-06	2.11662e-05
LOC108695577	123.41	0.458245	0.360306	1.27182	0.203436	0.408493
LOC108695578	2.16591	0.681518	3.5758	0.190591	0.848846	1
LOC108695579	381.285	0.277034	0.57942	0.478123	0.632563	0.817835
LOC108695580	268.723	-0.198805	0.208416	-0.953884	0.340142	0.572558
LOC108695581	14.7618	-0.298336	2.85717	-0.104417	0.916839	1
LOC108695582	529.901	0.562977	0.226277	2.488	0.0128465	0.0513297
LOC108695583	48.945	-0.0381081	0.375468	-0.101495	0.919157	0.968494
LOC108695584	2.25554	1.59595	3.23927	0.492688	0.622233	1
LOC108695585	56.2672	-0.470447	0.384115	-1.22476	0.220667	0.430895
LOC108695586	54.6837	0.0285825	0.365428	0.0782165	0.937656	0.976091		X
LOC108695587	27.775	0.360394	4.08724	0.0881753	0.929737	0.972087
LOC108695588	8.32688	1.4429	1.2822	1.12533	0.260449	1
LOC108695589	6.90517	0.188156	2.49629	0.0753744	0.939917	1
LOC108695591	8.67197	0.269702	1.26132	0.213825	0.830684	1	X
LOC108695592	304.817	-4.16469	0.825388	-5.04574	4.51776e-07	6.15549e-06
LOC108695593	2.05223	2.55096	2.95113	0.864401	0.387367	1
LOC108695598	1.46598	1.92569	2.24477	0.857856	0.390972	1
LOC108695610	2.71924	1.08375	3.45297	0.313859	0.753628	1
LOC108695611	3.96869	-0.101193	3.05451	-0.0331291	0.973572	1
LOC108695612	5.92265	-0.0233324	3.29537	-0.00708035	0.994351	1
LOC108695613	1.82023	2.09142	3.57228	0.585457	0.55824	1
LOC108695614	3.99331	0.366602	3.40199	0.107761	0.914185	1
LOC108695615	1.20679	-1.2944	3.53803	-0.365855	0.714473	1
LOC108695616	3.55202	1.10142	3.3785	0.326009	0.744418	1
LOC108695628	3.09373	-1.53169	3.07018	-0.498893	0.617855	1
LOC108695629	1.735	-0.326882	3.65048	-0.0895448	0.928649	1
LOC108695630	1.58916	4.56799	4.17598	1.09387	0.274011	1
LOC108695632	3.5676	1.09994	2.19135	0.501944	0.615707	1
LOC108695633	1.54842	0.0164786	3.1032	0.00531018	0.995763	1
LOC108695634	1.80391	-0.927338	4.20826	-0.220361	0.82559	1
LOC108695635	1.66384	2.26484	3.9744	0.569855	0.568776	1
LOC108695636	6.72522	-0.0638773	2.31346	-0.0276112	0.977972	1
LOC108695637	2.89906	0.926904	3.47575	0.266677	0.789717	1
LOC108695638	25.7758	0.514973	0.97657	0.527328	0.597966	0.79347
LOC108695639	8.34431	-0.808272	1.63374	-0.494737	0.620786	1
LOC108695641	1.82214	1.72394	4.19643	0.410812	0.681211	1
LOC108695643	4.52305	0.694473	3.79032	0.183223	0.854623	1
LOC108695645	4.21687	0.428966	3.83611	0.111823	0.910964	1
LOC108695646	3.6843	0.102455	3.50726	0.0292121	0.976695	1
LOC108695647	1.54243	3.12848	4.30103	0.727379	0.466994	1
LOC108695648	3.48014	-2.05709	3.43872	-0.598214	0.549697	1
LOC108695649	2.5743	0.102151	4.0917	0.0249654	0.980083	1
LOC108695651	1.82839	1.10959	3.18628	0.348241	0.727659	1
LOC108695653	0.843544	3.73325	3.37667	1.1056	0.268899	1
LOC108695655	1.1546	-1.00078	3.7073	-0.269949	0.787199	1
LOC108695659	10.7958	-0.881904	0.971287	-0.907975	0.363891	1
LOC108695660	12.2889	-0.25571	1.97858	-0.129239	0.897169	1
LOC108695661	4.76831	0.562565	2.91937	0.192701	0.847193	1
LOC108695662	2.69927	0.328558	4.06601	0.080806	0.935596	1
LOC108695663	2.31319	1.12121	3.63069	0.308815	0.757463	1
LOC108695665	15.5187	0.32869	1.48752	0.220965	0.825119	1
LOC108695666	6.84674	-0.0477397	2.21707	-0.0215327	0.982821	1
LOC108695667	71.6827	-0.125488	0.358689	-0.349853	0.726449	0.877114
LOC108695668	68.0244	-0.23305	1.10505	-0.210895	0.832969	0.930039		X
LOC108695669	28.8121	0.363052	0.613147	0.592113	0.553775	0.761971
LOC108695671	1310.02	-2.16744	0.237251	-9.13564	6.50195e-20	3.4159e-18
LOC108695672	50.4399	-0.012189	0.311566	-0.0391219	0.968793	0.987974
LOC108695673	126.461	0.138474	0.267358	0.517936	0.604503	0.79905
LOC108695674	3.76851	1.14561	2.66592	0.429723	0.667397	1
LOC108695675	2.00179	-0.250389	2.43239	-0.10294	0.918011	1
LOC108695678	15.8688	1.98635	1.24655	1.59348	0.111053	1
LOC108695679	896.102	-0.595033	0.236169	-2.51952	0.0117516	0.0477359
LOC108695680	10.6332	0.467903	2.15082	0.217546	0.827783	1
LOC108695683	13.0037	0.0838816	4.07463	0.0205863	0.983576	1
LOC108695685	1.564	1.52056	3.41695	0.445005	0.656316	1
LOC108695686	1.53167	1.56017	4.2651	0.365799	0.714515	1
LOC108695689	22.9954	0.001275	0.779621	0.00163541	0.998695	0.999537
LOC108695690	162.053	-0.492771	0.268427	-1.83577	0.0663916	0.183694
LOC108695691	58.4308	-0.793726	0.509205	-1.55876	0.119054	0.282822
LOC108695693	4.91845	0.659945	3.30659	0.199585	0.841805	1
LOC108695694	30.4509	1.01708	0.831244	1.22356	0.221118	0.431598
LOC108695696	45.3284	-0.508875	1.11722	-0.455481	0.648763	0.8284
LOC108695697	3.76658	1.52602	2.41905	0.630833	0.52815	1
LOC108695700	130.696	0.567275	0.248195	2.28561	0.0222773	0.0799338	X
LOC108695702	5.82383	0.321402	2.66409	0.120642	0.903974	1
LOC108695703	47.5764	-0.33854	0.399699	-0.846987	0.397003	0.629708
LOC108695704	9.28671	0.87792	2.10236	0.417588	0.676249	1
LOC108695705	4.23271	0.593543	2.93462	0.202255	0.839717	1
LOC108695708	7.11495	-0.108897	2.78107	-0.0391563	0.968766	1
LOC108695710	2.01241	0.101414	3.301	0.0307223	0.975491	1
LOC108695711	31.8537	0.764553	0.971567	0.786927	0.431324	0.661491
LOC108695714	3.52711	-2.30006	2.87843	-0.799069	0.42425	1
LOC108695721	2.53541	-0.389098	4.09516	-0.095014	0.924304	1
LOC108695725	4.47088	-1.02441	3.79556	-0.269897	0.78724	1
LOC108695726	2.35162	2.12569	3.54483	0.599659	0.548733	1
LOC108695727	3.45467	-0.172017	3.06029	-0.0562092	0.955175	1
LOC108695728	2.40524	0.357726	3.53172	0.10129	0.919321	1
LOC108695729	1.54415	1.13381	3.82098	0.296732	0.766671	1
LOC108695731	2.39891	0.962033	4.05534	0.237226	0.812481	1
LOC108695733	1.37963	0.786683	3.64863	0.21561	0.829292	1
LOC108695734	2.10514	0.922672	4.14079	0.222825	0.823672	1
LOC108695735	267.562	-1.06884	0.190742	-5.60362	2.09919e-08	3.47819e-07
LOC108695737	2.91277	3.77681	4.03307	0.936461	0.349036	1
LOC108695738	1.39913	-1.41322	3.62852	-0.389475	0.696925	1
LOC108695739	10.0012	0.36587	2.38752	0.153243	0.878207	1
LOC108695740	262.949	-1.10697	0.180761	-6.12398	9.12668e-10	1.81112e-08
LOC108695741	3.47539	0.460874	2.06066	0.223654	0.823027	1
LOC108695742	3.37336	-0.436432	1.75503	-0.248674	0.803613	1
LOC108695744	2.05654	0.886794	3.11568	0.284623	0.775933	1
LOC108695745	2.54415	1.48611	2.65503	0.559733	0.575662	1
LOC108695747	1.73467	0.0962798	3.56292	0.0270227	0.978442	1
LOC108695749	1.50093	0.0961603	3.54338	0.027138	0.97835	1
LOC108695751	3.2461	0.647001	3.48363	0.185726	0.85266	1
LOC108695752	3.35468	1.24399	2.83672	0.43853	0.661002	1
LOC108695753	43.0698	-0.548665	0.352368	-1.55708	0.119452	0.283458
LOC108695754	10.1723	0.517596	1.34033	0.386172	0.699369	1
LOC108695756	83.7381	0.356823	0.241704	1.47629	0.139867	0.317222
LOC108695757	1118.87	-2.33052	0.255463	-9.12273	7.32576e-20	3.81487e-18
LOC108695758	9.75092	1.61054	1.01554	1.58589	0.112764	1
LOC108695759	67.796	0.131186	0.475402	0.275947	0.782589	0.905443
LOC108695760	1.93842	-1.67575	3.17077	-0.528499	0.597153	1
LOC108695761	75.7821	0.69469	0.353938	1.96275	0.0496758	0.14757
LOC108695762	61.4175	0.73336	1.041	0.704476	0.481136	0.703837
LOC108695763	14.3682	0.378647	2.7588	0.137251	0.890833	1
LOC108695764	14.6503	-0.0922803	1.25376	-0.0736028	0.941326	1
LOC108695767	1.72319	0.980725	3.2751	0.299449	0.764598	1
LOC108695771	2.70977	0.95214	3.47654	0.273875	0.78418	1
LOC108695772	9.53798	-0.911951	1.92345	-0.474122	0.635413	1
LOC108695773	2.44721	-0.155613	2.81936	-0.0551946	0.955983	1
LOC108695774	1302.54	-1.05153	0.295817	-3.55466	0.000378473	0.00261222
LOC108695775	8.40483	0.518517	2.16033	0.240017	0.810317	1
LOC108695776	1.49243	2.57128	3.40639	0.754838	0.450346	1
LOC108695777	252.439	0.535249	0.191848	2.78997	0.00527136	0.0247326
LOC108695778	2.287	0.100474	3.32879	0.0301834	0.975921	1
LOC108695780	3.45784	0.615078	2.76101	0.222772	0.823713	1
LOC108695781	60.4222	-0.490713	0.332756	-1.47469	0.140295	0.317906
LOC108695782	12.092	0.788367	1.8192	0.433358	0.664755	1
LOC108695783	55.3491	-1.39192	0.409668	-3.39769	0.000679572	0.00437073
LOC108695784	2.65301	0.517954	3.2694	0.158425	0.874122	1
LOC108695785	36.5216	-3.38251	0.6324	-5.34869	8.85951e-08	1.3439e-06
LOC108695787	298.578	-1.35022	0.274305	-4.92235	8.55129e-07	1.09878e-05		X
LOC108695788	4.1939	-0.569997	2.65266	-0.214878	0.829863	1
LOC108695789	154.154	0.303094	0.329514	0.919819	0.357667	0.590315
LOC108695791	6.59608	1.4815	2.5928	0.57139	0.567736	1
LOC108695792	9.76395	-0.649013	2.07737	-0.312421	0.754721	1
LOC108695794	2.54473	0.248019	3.21215	0.0772127	0.938454	1
LOC108695795	102.583	0.753493	0.224644	3.35417	0.000796022	0.00501888
LOC108695796	3.35701	0.604206	3.3777	0.178881	0.858031	1
LOC108695797	96.8097	0.136392	0.296483	0.460033	0.645492	0.826823
LOC108695798	9.19557	0.525438	1.7905	0.293458	0.769172	1
LOC108695799	17.4562	-0.914933	0.698321	-1.31019	0.190131	0.390075
LOC108695800	2.50635	2.12569	3.54462	0.599697	0.548709	1
LOC108695801	3.13168	-0.430595	3.08437	-0.139606	0.888972	1
LOC108695803	5.82827	-0.278458	2.07784	-0.134013	0.893392	1
LOC108695804	116.962	-1.56851	0.274609	-5.71181	1.11782e-08	1.93044e-07
LOC108695805	4.07847	1.35038	2.11533	0.638376	0.523229	1
LOC108695807	7.22748	3.23859	1.26186	2.56653	0.0102721	1
LOC108695808	5.72211	-2.22744	1.61865	-1.37611	0.168789	1
LOC108695810	4.6716	0.520927	3.04265	0.171208	0.86406	1
LOC108695812	7.46811	0.823577	1.31229	0.627586	0.530275	1
LOC108695813	354.957	-1.10488	0.178282	-6.19736	5.7417e-10	1.17279e-08
LOC108695814	1127.71	-0.224671	0.261045	-0.860659	0.389426	0.622441
LOC108695815	12.1056	-0.587471	0.80688	-0.728077	0.466566	1
LOC108695816	7.87914	-0.522328	1.61064	-0.324298	0.745712	1
LOC108695817	21.2726	0.0924961	1.1934	0.0775061	0.938221	0.976508
LOC108695820	5.46786	-0.662482	3.25621	-0.203452	0.838782	1
LOC108695821	8.7122	1.18683	1.62729	0.729328	0.465801	1
LOC108695822	16.0362	2.44396	1.16513	2.09759	0.0359416	1
LOC108695823	1.38661	-0.65609	3.63482	-0.180501	0.856759	1
LOC108695825	1.99676	4.74036	4.26488	1.11149	0.266359	1
LOC108695826	8.25101	0.79081	2.22224	0.355862	0.721944	1
LOC108695828	3.53286	-0.496636	3.51781	-0.141178	0.88773	1
LOC108695829	8.91454	0.178105	1.17784	0.151214	0.879807	1
LOC108695830	4.8883	-1.07471	2.41819	-0.444425	0.656735	1
LOC108695831	4.82565	1.11719	3.17896	0.351432	0.725264	1
LOC108695832	3.90088	-1.47397	2.77209	-0.531717	0.594922	1
LOC108695833	14.6597	-2.78822	1.42295	-1.95947	0.050058	1
LOC108695834	3.9073	0.0200261	2.00549	0.00998561	0.992033	1
LOC108695836	3.15013	-0.396163	2.88288	-0.137419	0.890699	1
LOC108695837	11.2749	-1.13411	1.33939	-0.846741	0.39714	1
LOC108695839	3.76778	0.201463	2.87697	0.0700263	0.944173	1
LOC108695840	1.96483	-3.35473	2.98984	-1.12204	0.261845	1
LOC108695842	5.45042	0.413317	2.7699	0.149217	0.881382	1
LOC108695843	5.57611	-0.79385	2.11905	-0.374624	0.70794	1
LOC108695845	51.7223	0.503233	1.01834	0.494172	0.621185	0.810497
LOC108695846	8.43054	-0.368649	2.65701	-0.138746	0.889651	1
LOC108695847	2.55673	1.75053	3.12014	0.561041	0.57477	1
LOC108695848	0.794305	-1.86097	3.64137	-0.511063	0.609307	1
LOC108695849	2.54068	0.485747	2.89287	0.167912	0.866653	1
LOC108695850	4.50919	0.236611	2.63672	0.0897369	0.928496	1
LOC108695851	1.68016	0.0997678	3.61347	0.02761	0.977973	1
LOC108695855	2.69597	0.695221	4.0335	0.172362	0.863153	1
LOC108695859	1.80382	-1.00935	3.01587	-0.334681	0.737865	1
LOC108695860	13.8425	0.851371	1.75812	0.484251	0.628207	1
LOC108695861	17.9806	0.767899	1.33294	0.576092	0.564553	0.76926
LOC108695864	4.40405	0.273803	3.23277	0.084696	0.932503	1
LOC108695867	9.61519	-0.337984	2.3121	-0.146181	0.883779	1
LOC108695870	4.35168	0.249103	2.9924	0.0832454	0.933656	1
LOC108695871	3.81714	1.10311	3.13818	0.351512	0.725205	1
LOC108695872	2.22758	-0.716981	4.13594	-0.173354	0.862373	1
LOC108695874	4.33987	0.652886	2.62513	0.248706	0.803588	1
LOC108695875	4.37684	1.21369	3.25324	0.373072	0.709095	1
LOC108695876	2.38671	0.517896	3.2151	0.161082	0.872029	1
LOC108695877	5.47003	0.823853	2.56414	0.321298	0.747984	1
LOC108695878	5.75101	1.49587	2.90341	0.51521	0.606406	1
LOC108695879	7.17802	1.47061	3.18536	0.461676	0.644314	1
LOC108695880	3.20378	0.598745	3.11414	0.192267	0.847533	1
LOC108695881	2.6156	3.92011	3.15815	1.24127	0.214506	1
LOC108695882	4.73986	2.13781	3.73859	0.571824	0.567441	1
LOC108695883	4.40576	1.63916	3.05548	0.536465	0.591637	1
LOC108695884	4.52774	0.42342	3.30417	0.128147	0.898033	1
LOC108695885	3.78614	-1.57645	3.34053	-0.471916	0.636987	1
LOC108695886	15.8298	0.412537	2.68531	0.153627	0.877904	1
LOC108695887	1.70684	-2.94024	2.64414	-1.11198	0.266145	1
LOC108695890	23.0591	0.689931	1.16323	0.593116	0.553104	0.761442
LOC108695891	9.07884	1.21642	1.5756	0.77204	0.440091	1
LOC108695892	1.8687	-0.210287	2.72518	-0.0771644	0.938493	1
LOC108695894	37.9824	1.78247	0.568709	3.13424	0.001723	0.0097179
LOC108695895	7.55413	0.663157	1.45654	0.455297	0.648896	1
LOC108695896	2.4589	1.5979	3.4744	0.459908	0.645583	1
LOC108695897	2.92586	0.20738	3.51646	0.058974	0.952973	1
LOC108695899	6.81701	0.0402533	1.43067	0.0281359	0.977554	1
LOC108695900	3.0615	-1.14901	3.67006	-0.313076	0.754223	1
LOC108695901	289.279	-0.144138	0.254215	-0.566993	0.570719	0.773435
LOC108695902	10.688	0.22812	2.03224	0.11225	0.910625	1
LOC108695903	6.08957	1.19603	3.04213	0.393154	0.694206	1
LOC108695904	6.63955	-0.0158624	2.64877	-0.0059886	0.995222	1
LOC108695906	204.648	0.0979277	2.34354	0.0417863	0.966669	0.987252
LOC108695907	10.6898	0.956733	3.99325	0.239587	0.81065	1
LOC108695909	2.57847	1.7141	4.07512	0.420626	0.674028	1
LOC108695911	5.89069	0.328336	2.80704	0.116969	0.906885	1
LOC108695912	612.4	-0.433544	0.245367	-1.76692	0.0772416	0.205405
LOC108695914	1.80496	-0.173773	3.58062	-0.0485316	0.961293	1
LOC108695917	1.79009	-0.624563	2.63844	-0.236717	0.812877	1
LOC108695918	7.11283	0.755728	2.04664	0.369252	0.71194	1
LOC108695919	4.72001	-0.279275	1.9691	-0.141829	0.887215	1
LOC108695920	4.24721	0.0106138	3.10836	0.00341461	0.997276	1
LOC108695921	5.42881	0.80002	2.43128	0.329053	0.742116	1
LOC108695922	4.2983	0.743501	1.67317	0.444366	0.656778	1
LOC108695923	5.03557	0.948981	2.04295	0.464515	0.642279	1
LOC108695924	1.49113	0.102243	4.16593	0.0245427	0.98042	1
LOC108695925	1.70578	-2.43304	3.75259	-0.648362	0.516751	1
LOC108695926	6.14392	-0.68116	2.55674	-0.266417	0.789918	1
LOC108695927	3.4065	0.375625	2.63635	0.14248	0.886701	1
LOC108695929	6.67558	1.19246	3.2916	0.362272	0.717148	1
LOC108695931	18.736	-0.175648	1.25958	-0.13945	0.889095	0.956813
LOC108695932	2.68103	-1.33771	4.07208	-0.328508	0.742528	1
LOC108695933	3.16348	0.328599	3.99803	0.0821902	0.934495	1
LOC108695935	1.65828	0.526303	4.18061	0.125891	0.899818	1
LOC108695936	1.80391	-0.927338	4.20826	-0.220361	0.82559	1
LOC108695937	2.39494	-1.1346	3.23098	-0.351164	0.725465	1
LOC108695940	3.87287	1.83103	2.96103	0.618376	0.536327	1
LOC108695941	4.21358	0.694381	3.82967	0.181316	0.85612	1
LOC108695942	1.48949	0.43023	4.14794	0.103721	0.917391	1
LOC108695943	3.31102	0.753993	2.24744	0.33549	0.737256	1
LOC108695944	5.22501	-0.476493	2.37423	-0.200693	0.840938	1
LOC108695945	4.3226	-1.20608	2.89082	-0.41721	0.676525	1
LOC108695946	3.69357	-0.43876	2.99785	-0.146358	0.883638	1
LOC108695947	3.50501	-1.81212	2.61417	-0.693189	0.488191	1
LOC108695948	2.63148	-0.621694	3.26901	-0.190178	0.84917	1
LOC108695949	1.88718	-0.0645391	3.64026	-0.0177292	0.985855	1
LOC108695950	3.70398	1.15507	2.30636	0.500817	0.6165	1
LOC108695952	4.51228	-0.857808	2.75564	-0.311292	0.755579	1
LOC108695953	5.88408	0.524426	2.93208	0.178858	0.858049	1
LOC108695954	1.65993	0.101273	4.19459	0.0241437	0.980738	1
LOC108695955	23.5378	0.422718	4.08767	0.103413	NA	1
LOC108695959	16.2838	0.89509	1.57568	0.568065	0.569991	1
LOC108695960	873.494	-0.528314	0.198705	-2.65878	0.00784235	0.0343088
LOC108695961	99.4637	0.684182	0.301788	2.26709	0.0233845	0.0831316
LOC108695962	211.454	0.742644	0.230347	3.22402	0.00126406	0.00750426
LOC108695963	3.67885	-1.05202	3.53872	-0.297289	0.766246	1
LOC108695964	1.3904	2.63376	3.64458	0.722652	0.469894	1
LOC108695965	409.232	-0.792995	0.219728	-3.60899	0.00030739	0.00217347
LOC108695966	3.61111	-1.88079	2.88209	-0.652579	0.514028	1
LOC108695967	44.9771	-0.311777	0.633237	-0.492355	0.622468	0.811352
LOC108695968	14.5311	-0.693229	1.08612	-0.638259	0.523305	1
LOC108695969	3.4233	-0.41645	3.94677	-0.105517	0.915966	1
LOC108695970	5.59035	1.11435	2.90254	0.383923	0.701035	1
LOC108695971	2.29053	-0.953026	3.5884	-0.265586	0.790558	1
LOC108695973	2.23505	0.328534	4.09206	0.0802857	0.93601	1
LOC108695974	16.8279	0.130157	0.991231	0.131308	0.895531	1
LOC108695975	6.4664	0.409866	2.77643	0.147623	0.88264	1
LOC108695976	7.56432	1.33442	2.15665	0.618747	0.536083	1
LOC108695977	4.21363	1.96534	2.57457	0.763365	0.445246	1
LOC108695978	3.36916	0.0051804	3.46071	0.00149692	0.998806	1
LOC108695979	6.38454	0.270919	1.712	0.158248	0.874262	1
LOC108695980	7.48286	0.97887	3.10446	0.31531	0.752526	1
LOC108695981	2.68468	-0.6058	3.10451	-0.195135	0.845287	1
LOC108695982	6.91861	0.484383	1.54602	0.31331	0.754045	1
LOC108695983	140.314	-1.7807	0.220097	-8.09053	5.94048e-16	2.30744e-14
LOC108695984	8.45925	-0.41933	2.03024	-0.206542	0.836367	1
LOC108695985	6.47783	-0.401354	2.8971	-0.138536	0.889817	1
LOC108695986	3.09143	0.639306	3.07593	0.207841	0.835353	1
LOC108695987	4.77483	0.35156	2.2125	0.158897	0.87375	1
LOC108695988	3.47237	-2.50856	2.44307	-1.02681	0.304511	1
LOC108695989	27.3695	-0.395418	2.09128	-0.18908	0.85003	0.938606
LOC108695990	27.9215	-0.421375	0.835343	-0.504433	0.613957	0.805701
LOC108695991	50.4317	-0.254418	0.346893	-0.733419	0.463303	0.687684
LOC108695992	33.5737	-2.27025	0.795303	-2.85457	0.00430954	0.0209457
LOC108695993	6.889	0.372406	2.33439	0.15953	0.873251	1
LOC108696000	24.085	-0.625144	4.08072	-0.153195	0.878245	0.951896
LOC108696003	32.5534	0.0650472	0.710129	0.0915992	0.927017	0.97133
LOC108696004	10.544	-0.162877	1.56597	-0.10401	0.917161	1
LOC108696005	20.3586	0.038368	1.0102	0.0379804	0.969703	0.988212
LOC108696007	21.958	-0.488676	0.601933	-0.811844	0.416881	0.648731
LOC108696008	7.68365	2.8674	1.72425	1.66298	0.0963158	1
LOC108696012	248.646	-0.457439	0.219037	-2.08841	0.0367609	0.117546
LOC108696013	55.3176	-0.50836	0.345035	-1.47336	0.140654	0.318337
LOC108696014	175.943	-0.458287	0.324679	-1.41151	0.158095	0.345036
LOC108696015	3.68167	-0.199793	2.99786	-0.0666452	0.946864	1
LOC108696016	248.987	-0.658768	0.288895	-2.2803	0.0225897	0.080831
LOC108696017	4.05276	0.0982307	3.35061	0.0293172	0.976612	1
LOC108696018	3.91234	-0.0916081	3.88079	-0.0236055	0.981167	1
LOC108696019	62.6432	-5.27792	1.55382	-3.39675	0.000681916	0.0043794
LOC108696020	40.1343	-0.894333	0.524974	-1.70358	0.0884599	0.227181
LOC108696022	187.357	0.23356	0.228038	1.02422	0.305734	0.535128		X
LOC108696023	7.87869	-0.110516	1.04865	-0.105389	0.916067	1
LOC108696024	7.77826	0.239551	1.12219	0.213467	0.830962	1
LOC108696025	10.7965	1.70959	0.835561	2.04604	0.0407526	1
LOC108696026	2.47603	0.532415	2.87155	0.18541	0.852907	1
LOC108696027	14.9201	0.477127	1.91062	0.249723	0.802801	1
LOC108696028	3.23659	0.346801	2.73005	0.127031	0.898916	1
LOC108696029	18.4808	0.2886	1.54706	0.186547	0.852015	0.940125
LOC108696031	3.46677	-1.35698	3.42567	-0.39612	0.692017	1
LOC108696032	4.605	4.5185	3.76478	1.2002	0.230061	1
LOC108696034	3.74426	2.12725	3.42499	0.621096	0.534536	1
LOC108696035	11.5292	0.757163	1.53819	0.492244	0.622547	1
LOC108696036	2.11894	1.32167	3.56411	0.370828	0.710765	1
LOC108696037	14.3692	0.269076	1.74935	0.153816	0.877755	1
LOC108696038	9.52939	-1.2706	1.71036	-0.742887	0.45755	1
LOC108696040	4.0068	-0.05954	2.57702	-0.0231042	0.981567	1
LOC108696044	4.01023	-0.0733314	2.14589	-0.034173	0.972739	1
LOC108696045	117.512	0.12197	0.270736	0.450512	0.652341	0.830532
LOC108696047	5.02307	0.451601	1.31363	0.34378	0.731012	1
LOC108696052	3.12592	2.48688	3.46965	0.716752	0.473527	1
LOC108696053	37.2535	0.526938	2.08586	0.252624	0.800559	0.915156
LOC108696054	5.72893	1.23931	2.01136	0.616154	0.537793	1
LOC108696056	12.6189	0.963366	1.48693	0.647888	0.517057	1
LOC108696057	38.4309	-0.29693	0.445737	-0.666155	0.505312	0.723917
LOC108696061	62.0044	0.759808	0.28177	2.69655	0.00700612	0.03144
LOC108696065	21.613	-0.0590503	1.53746	-0.0384078	0.969363	0.988126
LOC108696066	46.6867	-0.680744	0.512002	-1.32957	0.183658	0.380951
LOC108696067	73.1246	0.428181	0.293362	1.45957	0.14441	0.32408		X
LOC108696068	1.64851	-3.09015	3.35079	-0.922213	0.356417	1
LOC108696071	124.811	-0.805221	0.31751	-2.53605	0.0112112	0.0459501
LOC108696073	5.09966	0.646609	1.87428	0.34499	0.730102	1
LOC108696074	630.553	-1.44976	0.218384	-6.63859	3.16708e-11	7.55699e-10
LOC108696075	63.743	-0.29644	0.268229	-1.10517	0.269085	0.492355
LOC108696078	1631.25	-0.388676	0.267761	-1.45158	0.146619	0.327303
LOC108696085	31.4248	1.32214	0.473765	2.79071	0.00525934	0.0247006
LOC108696087	228.268	-0.0644636	0.206651	-0.311944	0.755083	0.891889
LOC108696088	4.15963	0.124652	1.5823	0.0787793	0.937208	1
LOC108696090	7.31443	0.178686	2.02151	0.0883923	0.929565	1
LOC108696093	6.16115	1.54556	1.52338	1.01456	0.310317	1
LOC108696096	380.076	-0.0809623	0.199849	-0.405118	0.685391	0.851224
LOC108696099	24.537	1.89106	0.622668	3.03702	0.0023893	0.012843
LOC108696100	20.2999	-0.145334	1.13544	-0.127998	0.898151	0.960194
LOC108696102	9.37208	0.0109581	1.02819	0.0106577	0.991497	1
LOC108696103	150.632	1.21946	0.245831	4.96055	7.02931e-07	9.19134e-06
LOC108696105	1.97977	1.44816	2.79489	0.518144	0.604358	1
LOC108696107	138.256	-0.351499	0.279262	-1.25867	0.208148	0.414303
LOC108696109	195.563	-1.78655	0.211973	-8.4282	3.51012e-17	1.47463e-15
LOC108696110	198.751	-0.802336	0.230306	-3.48378	0.00049438	0.00329282		X
LOC108696111	195.008	0.106504	0.214211	0.497194	0.619052	0.809075
LOC108696112	16.3825	-1.68147	1.12716	-1.49178	0.135757	1
LOC108696113	1.5863	2.39369	3.05718	0.782972	0.433644	1
LOC108696114	1.26731	0.26188	3.50163	0.074788	0.940383	1
LOC108696115	3.66243	0.572586	2.58297	0.221677	0.824565	1
LOC108696118	113.767	0.146266	0.251976	0.580476	0.561594	0.767346
LOC108696120	70.436	-3.73174	1.04713	-3.56379	0.00036554	0.00253458
LOC108696123	2.14287	-0.0611144	2.07836	-0.0294051	0.976542	1
LOC108696132	2.16425	3.17688	3.57471	0.888708	0.37416	1
LOC108696133	1.11514	-1.97896	2.98544	-0.662872	0.507413	1
LOC108696134	149.31	0.945137	0.191864	4.92608	8.38935e-07	1.08208e-05
LOC108696138	207.347	-1.5817	0.202201	-7.82241	5.18227e-15	1.84367e-13
LOC108696140	12.5898	0.00501724	0.830988	0.00603768	0.995183	1
LOC108696141	2.62248	0.660196	1.85965	0.35501	0.722582	1
LOC108696143	350.473	0.164233	0.278049	0.59066	0.554748	0.762506
LOC108696144	1.11651	2.29268	2.58748	0.886069	0.37558	1
LOC108696145	279.092	-0.881166	0.193442	-4.55521	5.23344e-06	5.76214e-05
LOC108696147	8.10448	0.941918	2.01664	0.467073	0.640447	1
LOC108696153	1.20391	0.16216	2.7108	0.0598199	0.952299	1
LOC108696154	15.8561	0.490966	1.6862	0.291167	0.770923	1
LOC108696160	793.394	0.139377	0.263531	0.528883	0.596887	0.79266
LOC108696161	11.2163	-0.697989	1.32888	-0.525247	0.599411	1
LOC108696163	109.474	-0.708377	0.257939	-2.7463	0.00602717	0.0276652
LOC108696164	26.4382	1.69427	0.836826	2.02464	0.0429041	0.132027
LOC108696165	5.11999	0.112654	1.2985	0.0867574	0.930864	1
LOC108696166	276.909	-0.0813389	0.206702	-0.393508	0.693944	0.856638
LOC108696170	11.6569	-0.727435	1.4671	-0.495832	0.620013	1
LOC108696172	12.454	1.07604	1.64257	0.655096	0.512406	1		X
LOC108696173	92.3454	-1.18496	0.264062	-4.48745	7.20808e-06	7.6518e-05
LOC108696174	106.942	0.640796	1.77953	0.360092	0.718778	0.8724
LOC108696176	32.3812	-0.224595	0.402273	-0.558315	0.576629	0.777215
LOC108696179	12.1829	0.818356	2.26643	0.361077	0.718042	1
LOC108696180	121.153	-0.315108	0.298116	-1.057	0.290513	0.517861		X
LOC108696181	8.4352	0.371696	1.08414	0.342849	0.731712	1
LOC108696184	930.054	-1.03514	0.199286	-5.19423	2.05565e-07	2.95549e-06
LOC108696188	7.26474	-0.293347	2.23186	-0.131436	0.895431	1
LOC108696191	58.7566	0.78519	0.626941	1.25241	0.210419	0.417282
LOC108696193	1.64714	1.10945	3.25342	0.34101	0.733096	1
LOC108696194	151.975	-1.23199	0.299706	-4.11066	3.94536e-05	0.000353962
LOC108696196	223.109	0.506178	0.242536	2.08702	0.0368859	0.117882
LOC108696198	4.57712	0.140506	2.84627	0.0493649	0.960628	1
LOC108696199	29.5825	0.231593	1.07793	0.214851	0.829884	0.928692
LOC108696200	6.21642	0.103755	3.27156	0.0317143	0.9747	1
LOC108696204	100.847	-0.392721	0.250349	-1.56869	0.11672	0.278647
LOC108696207	10.4285	1.00767	0.970967	1.0378	0.299361	1	X
LOC108696208	19.1934	-0.252869	0.580668	-0.43548	0.663214	0.837436
LOC108696209	7.23025	-0.23609	1.66671	-0.141651	0.887356	1
LOC108696210	18.72	-0.69022	0.792522	-0.870915	0.3838	0.616526
LOC108696211	30.5048	0.314421	0.609604	0.51578	0.606008	0.79996
LOC108696212	38.289	-0.963807	0.487223	-1.97816	0.0479102	0.143422
LOC108696217	16.2782	0.196063	1.18347	0.165667	0.868419	1
LOC108696218	23.8238	0.475015	1.3201	0.359833	0.718972	0.872488
LOC108696219	4.14764	-0.757568	1.86802	-0.405546	0.685076	1
LOC108696220	33.9097	-1.14897	0.575852	-1.99526	0.0460145	0.139019
LOC108696223	2.51295	1.3772	3.57723	0.384991	0.700244	1
LOC108696228	4.52581	-1.7448	2.15746	-0.808728	0.418672	1
LOC108696235	1294.88	-0.0465617	0.204032	-0.228208	0.819485	0.923558
LOC108696237	303.395	0.431657	0.247715	1.74256	0.081411	0.213934
LOC108696238	24.815	-0.793119	1.81252	-0.437577	0.661693	0.836793
LOC108696239	33.8786	2.27404	0.714313	3.18354	0.00145486	0.00842413
LOC108696241	110.545	0.327009	0.213554	1.53127	0.125703	0.29396
LOC108696242	120.13	0.728845	0.250931	2.90456	0.00367764	0.0183991
LOC108696243	27.4819	1.08595	0.672531	1.61472	0.106372	0.2608
LOC108696244	50.2724	-2.05759	0.414432	-4.96484	6.87561e-07	9.02052e-06
LOC108696248	14.9966	0.70708	1.36111	0.519488	0.60342	1
LOC108696251	126.56	3.18744	1.58985	2.00486	0.0449778	0.136857
LOC108696252	2.63446	4.35531	2.63724	1.65146	0.0986438	1
LOC108696253	411.247	0.257617	0.215695	1.19436	0.232339	0.446475
LOC108696254	103.716	-1.41391	0.281488	-5.02298	5.0877e-07	6.86492e-06
LOC108696255	5.41237	-1.23409	1.54004	-0.801336	0.422937	1
LOC108696259	1.68606	1.86455	3.22889	0.577459	0.56363	1
LOC108696261	4.44272	0.117472	1.43704	0.0817463	0.934848	1
LOC108696263	126.945	0.73517	0.31252	2.35239	0.018653	0.0693151	X
LOC108696264	78.0525	-0.934441	0.468677	-1.99378	0.0461756	0.139427
LOC108696265	2.14821	-0.726991	3.607	-0.20155	0.840269	1
LOC108696266	2.6979	-0.645345	2.72952	-0.236431	0.813098	1
LOC108696267	11.2685	-0.78903	0.89404	-0.882544	0.377483	1
LOC108696270	19.8076	0.440807	0.760942	0.579291	0.562393	0.767912
LOC108696272	21.2673	-0.0459491	1.32545	-0.0346668	0.972345	0.989255
LOC108696273	4.39656	-0.163283	1.80009	-0.0907083	0.927724	1
LOC108696274	11.4521	0.66229	3.27919	0.201967	0.839942	1
LOC108696275	4.54933	0.27305	2.82397	0.0966902	0.922972	1
LOC108696277	10.2668	0.594549	0.996234	0.596796	0.550644	1
LOC108696279	93.9029	1.28734	0.318948	4.03621	5.43219e-05	0.000470432
LOC108696281	4.17013	0.142378	1.61041	0.088411	0.92955	1
LOC108696284	10.4397	0.866701	1.38389	0.626278	0.531133	1
LOC108696285	2.09625	0.825667	2.60276	0.317228	0.751071	1
LOC108696290	3.26857	-0.416389	3.96469	-0.105025	0.916356	1
LOC108696293	6.30078	-0.0649442	1.24389	-0.0522105	0.958361	1
LOC108696296	706.975	-8.09677	0.391274	-20.6934	3.97606e-95	4.95835e-92
LOC108696297	6.48436	-0.128016	2.5144	-0.0509131	0.959395	1
LOC108696298	4.5508	0.926531	2.50292	0.370179	0.711249	1
LOC108696299	5.43528	-0.272427	1.19817	-0.227369	0.820137	1
LOC108696300	76.9937	0.0751374	0.336783	0.223103	0.823455	0.925274
LOC108696301	3.76598	0.0769027	2.60709	0.0294975	0.976468	1
LOC108696302	2.99771	0.0954761	3.46278	0.0275721	0.978003	1
LOC108696303	4.11665	-0.996782	2.00516	-0.497109	0.619112	1
LOC108696305	8.1998	-0.0257526	1.32913	-0.0193755	0.984542	1
LOC108696306	46.6071	2.01543	0.70386	2.86339	0.00419131	0.0204689
LOC108696307	2.27332	1.14669	3.14525	0.36458	0.715425	1
LOC108696308	2033.73	0.0443149	0.242359	0.182848	0.854917	0.941458
LOC108696309	134.21	-0.226846	0.210711	-1.07657	0.281671	0.506597
LOC108696310	8.29519	1.25284	1.75977	0.711935	0.476505	1
LOC108696311	39.7484	-0.00454319	1.27867	-0.00355308	0.997165	0.998851
LOC108696313	9.46563	1.86349	0.956934	1.94735	0.0514927	1
LOC108696314	4.64812	0.471313	3.26134	0.144515	0.885094	1
LOC108696315	128.925	-0.216978	0.274018	-0.791839	0.428455	0.659239
LOC108696316	5.03826	0.448609	2.11642	0.211965	0.832134	1
LOC108696317	3.29448	0.648313	2.72281	0.238104	0.8118	1
LOC108696319	5.73709	1.21494	1.35219	0.898498	0.36892	1
LOC108696320	35.2351	0.171619	0.558374	0.307355	0.758573	0.893383
LOC108696321	42.6424	-1.11167	0.541922	-2.05135	0.0402329	0.125829
LOC108696325	73.0512	-0.88954	0.36048	-2.46766	0.0136001	0.0536924
LOC108696327	6.6808	-0.0746175	1.24575	-0.0598976	0.952237	1
LOC108696328	157.319	-0.0678457	0.268465	-0.252717	0.800487	0.91515
LOC108696331	64.7273	-0.12007	0.376435	-0.318965	0.749753	0.889053
LOC108696333	7.98631	0.217797	1.31117	0.166108	0.868072	1
LOC108696334	125	-0.949522	0.247626	-3.83451	0.000125816	0.000988421
LOC108696336	10.127	-1.11686	2.44476	-0.456839	0.647787	1
LOC108696337	23.7163	-0.707614	1.05958	-0.667827	0.504244	0.72278
LOC108696340	39.9858	0.545302	1.2859	0.424063	0.67152	0.842922
LOC108696346	2.02555	0.249733	3.61197	0.0691404	0.944878	1
LOC108696349	45.3874	0.0828735	0.419772	0.197425	0.843495	0.934865
LOC108696353	2.70496	-1.13639	1.95862	-0.580198	0.561781	1
LOC108696354	3.45076	-1.23804	2.47917	-0.499376	0.617514	1
LOC108696356	2.69452	0.941595	3.18516	0.295619	0.767521	1
LOC108696357	133.478	-0.296761	0.270667	-1.0964	0.272902	0.496712
LOC108696358	195.235	-0.154657	0.23833	-0.64892	0.51639	0.733577
LOC108696359	277.981	-2.87074	0.334953	-8.57059	1.02958e-17	4.53434e-16
LOC108696360	3.44878	1.16864	2.49976	0.467499	0.640143	1
LOC108696362	2.55529	0.790273	4.07778	0.1938	0.846333	1
LOC108696365	2.80177	1.77334	3.50011	0.506653	0.612398	1
LOC108696366	235.416	1.00622	0.234375	4.29318	1.76129e-05	0.000170892
LOC108696368	216.456	0.110027	0.251253	0.437914	0.661449	0.836574
LOC108696370	4.34481	0.650281	1.72385	0.377226	0.706005	1
LOC108696372	4.48183	-0.670892	1.61894	-0.414402	0.67858	1
LOC108696373	1.82757	2.93084	2.37538	1.23384	0.217262	1
LOC108696374	176.887	0.695344	0.327451	2.12351	0.0337115	0.110113
LOC108696377	354.645	-0.582351	0.20067	-2.90204	0.00370747	0.0185209
LOC108696378	2.38003	0.812418	2.4753	0.32821	0.742753	1
LOC108696379	607.218	0.405394	0.249206	1.62675	0.103791	0.256196		X
LOC108696380	23.1586	-0.455358	0.702179	-0.648492	0.516667	0.733795
LOC108696382	29.0156	0.700022	1.01093	0.692452	0.488653	0.710435
LOC108696383	0.976288	0.214419	2.7795	0.0771428	0.93851	1
LOC108696384	18.3008	0.330383	0.745837	0.44297	0.657788	0.834056
LOC108696387	3.0813	1.61239	2.30566	0.699317	0.484354	1
LOC108696388	4.27414	-0.638685	1.16736	-0.54712	0.584296	1
LOC108696390	10.7116	0.63185	2.12505	0.297335	0.766211	1
LOC108696393	3.52884	0.513963	3.37445	0.15231	0.878942	1
LOC108696394	69.2164	0.97941	0.354929	2.75945	0.00578979	0.026757
LOC108696396	3.95088	0.527346	2.73088	0.193104	0.846877	1
LOC108696399	53.7516	-2.02795	0.417756	-4.85439	1.20755e-06	1.51465e-05
LOC108696402	684.767	-0.584114	0.225045	-2.59554	0.0094442	0.0399234
LOC108696403	149.293	0.853546	0.221575	3.85218	0.000117072	0.000928003
LOC108696405	84.965	0.383544	0.284785	1.34679	0.178049	0.373601
LOC108696408	10.4268	0.548104	0.883145	0.620627	0.534845	1
LOC108696409	10.3776	0.597784	1.73485	0.344574	0.730414	1
LOC108696410	10.9035	1.58552	3.42018	0.463579	0.64295	1
LOC108696411	3.6335	-0.0395132	2.5786	-0.0153235	0.987774	1
LOC108696412	10.2932	0.640027	1.82738	0.350242	0.726157	1
LOC108696414	1.12361	0.926944	2.59648	0.357	0.721092	1
LOC108696416	97.2484	-2.66316	0.308811	-8.62391	6.47076e-18	2.8928e-16		X
LOC108696417	42.4924	0.0194282	0.436962	0.044462	0.964536	0.98629
LOC108696418	46.6257	1.05909	0.374064	2.83132	0.00463568	0.022275
LOC108696419	52.2718	-2.43782	0.43999	-5.54062	3.01403e-08	4.87804e-07
LOC108696420	3.57662	-1.21265	2.12274	-0.571265	0.56782	1
LOC108696422	3.05693	0.820205	3.19858	0.256428	0.79762	1
LOC108696423	21.5714	0.456269	2.33221	0.195638	NA	1
LOC108696425	412.488	0.231683	0.186404	1.2429	0.213903	0.421929
LOC108696426	5.00565	1.12811	1.6279	0.692985	0.488319	1
LOC108696429	94.4587	-1.96335	0.38498	-5.09987	3.39885e-07	4.72331e-06
LOC108696431	37.4916	-1.48935	0.523567	-2.84463	0.00444637	0.0214917
LOC108696441	22.7144	-0.532083	0.592363	-0.898237	0.369059	0.602253
LOC108696447	457.051	0.174237	0.221446	0.786815	0.43139	0.661491
LOC108696448	76.0945	2.42673	0.342772	7.0797	1.44463e-12	4.07004e-11
LOC108696452	21.3128	-1.03279	0.877581	-1.17686	0.239253	0.455403
LOC108696457	460.92	0.0499227	0.214519	0.232719	0.81598	0.922195
LOC108696458	1.77277	-2.43369	3.79719	-0.640918	0.521576	1
LOC108696459	619.964	-0.369616	0.234466	-1.57642	0.11493	0.275529
LOC108696468	1.61633	0.929049	2.91844	0.318338	0.750229	1
LOC108696471	257.601	-0.474114	0.210436	-2.25301	0.0242585	0.0855354
LOC108696472	650.992	-0.360187	0.273426	-1.31731	0.187735	0.386296
LOC108696473	4.42194	-0.296276	3.35714	-0.0882525	0.929676	1
LOC108696474	14.838	0.642354	1.3946	0.460601	0.645085	1
LOC108696475	13.3428	2.14857	1.18806	1.80847	0.0705333	1
LOC108696476	1.21764	0.489483	3.11502	0.157136	0.875137	1
LOC108696479	20.8682	0.368752	2.25966	0.163189	0.87037	0.948032
LOC108696480	1.8737	0.528424	3.57389	0.147857	0.882456	1
LOC108696481	22.3385	0.405519	1.12267	0.36121	0.717942	0.872124
LOC108696483	9.0891	0.105735	0.891381	0.118619	0.905577	1
LOC108696484	335.767	-0.423644	0.265618	-1.59494	0.110727	0.268532		X
LOC108696486	35.7754	0.176698	0.486218	0.363412	0.716297	0.871416
LOC108696489	29.9241	0.167503	1.57351	0.106452	0.915224	0.966757
LOC108696492	1.75602	1.41599	3.11059	0.455216	0.648954	1
LOC108696493	2.98553	-0.530637	2.57146	-0.206356	0.836513	1
LOC108696494	5.32998	1.18179	1.56968	0.752889	0.451517	1
LOC108696496	2.27888	0.101164	4.13794	0.024448	0.980495	1
LOC108696498	1.39983	-0.496903	2.58669	-0.1921	0.847664	1
LOC108696500	24.2735	0.225528	1.09357	0.206231	0.83661	0.931851
LOC108696501	5.23482	0.899118	2.11785	0.424544	0.671169	1
LOC108696502	3.53043	0.983869	3.4206	0.287631	0.773629	1
LOC108696503	4.20361	1.40696	1.64132	0.857211	0.391328	1
LOC108696504	6.9717	-1.40222	1.50847	-0.929564	0.352597	1
LOC108696506	37.2398	-0.192453	0.400418	-0.480629	0.63078	0.81696
LOC108696507	6.22473	-0.531476	2.54953	-0.20846	0.83487	1
LOC108696509	3.55946	0.341102	3.11459	0.109517	0.912792	1
LOC108696514	7.31834	0.270995	1.76901	0.15319	0.878248	1
LOC108696515	160.315	-0.459341	0.25343	-1.8125	0.0699097	0.190834
LOC108696518	2.3392	1.63418	3.50959	0.465633	0.641478	1
LOC108696519	41.8591	0.100542	0.561753	0.17898	0.857954	0.943377
LOC108696520	4.54824	0.208897	1.34099	0.155778	0.876208	1
LOC108696523	5.14974	-0.644937	1.36211	-0.473483	0.635869	1
LOC108696525	1204.51	-0.762509	0.310112	-2.45882	0.0139396	0.054701
LOC108696526	11.5447	0.623362	3.37459	0.184722	0.853447	1
LOC108696527	9.7615	-1.02832	2.32312	-0.442646	0.658022	1
LOC108696529	182.221	-0.355595	0.197402	-1.80138	0.0716432	0.194293
LOC108696531	433.907	-0.442022	0.187383	-2.35893	0.0183278	0.0682906
LOC108696532	6.17793	-1.87878	1.80568	-1.04049	0.298113	1
LOC108696533	5.70902	-1.31006	1.97379	-0.663727	0.506865	1
LOC108696536	1.62434	-1.52147	4.19382	-0.362788	0.716763	1
LOC108696537	21.3434	-0.292977	0.850182	-0.344605	0.730392	0.878451
LOC108696538	374.8	-0.250654	0.250352	-1.00121	0.316727	0.547216
LOC108696539	14.2113	0.592624	0.816981	0.725382	0.468217	1
LOC108696540	195.618	0.455299	0.286699	1.58808	0.112269	0.270997
LOC108696542	1.95456	0.365502	3.26001	0.112117	0.910731	1
LOC108696548	3.06694	0.0571693	1.6542	0.0345601	0.972431	1
LOC108696549	115.574	-0.719737	0.244692	-2.9414	0.00326733	0.0166947
LOC108696551	3.9449	2.79725	2.39589	1.16752	0.243002	1
LOC108696552	95.4836	-0.569268	0.266787	-2.13379	0.0328601	0.108122
LOC108696553	1.95206	2.13483	2.32431	0.918475	0.35837	1
LOC108696554	244.847	-0.923819	0.230184	-4.0134	5.9851e-05	0.000512888
LOC108696555	133.392	0.533538	0.201892	2.64269	0.00822495	0.0356796
LOC108696556	19.9257	-0.0899099	0.94663	-0.0949789	0.924332	0.970278
LOC108696557	268.583	0.420792	0.193314	2.17673	0.0295005	0.099429
LOC108696560	178.503	0.484211	0.223632	2.16521	0.0303717	0.101556
LOC108696561	475.89	-0.291201	0.19931	-1.46104	0.144004	0.323476
LOC108696562	3.56969	-1.10649	2.18	-0.507565	0.611758	1
LOC108696563	91.6579	-0.717857	0.285396	-2.5153	0.0118931	0.0481948
LOC108696564	3.44925	0.0910234	3.3784	0.0269428	0.978505	1
LOC108696565	6.23661	-0.196515	3.19728	-0.061463	0.95099	1
LOC108696566	10.2873	0.114331	1.47196	0.0776726	0.938089	1
LOC108696568	12.0189	0.162498	0.931797	0.174392	0.861558	1
LOC108696570	183.163	-0.524333	0.262458	-1.99778	0.045741	0.138379
LOC108696573	1.92731	0.861074	3.32787	0.258746	0.795831	1
LOC108696575	6.0045	0.0194788	2.00416	0.00971919	0.992245	1
LOC108696576	4.10329	-0.58523	1.97626	-0.29613	0.767131	1
LOC108696580	1.12361	-4.23931	3.95885	-1.07084	0.28424	1
LOC108696581	70.5851	-0.0729412	0.371266	-0.196466	0.844246	0.935314
LOC108696584	14.5082	-0.350653	1.14962	-0.305017	0.760353	1
LOC108696586	6.85448	0.10511	1.91088	0.0550061	0.956134	1
LOC108696587	34.8075	-1.50842	0.544801	-2.76875	0.00562718	0.0261023
LOC108696590	28.7884	-0.0819803	0.668492	-0.122635	0.902396	0.961225
LOC108696592	20.4432	-0.507402	0.838798	-0.604915	0.545235	0.755088
LOC108696593	53.789	-0.355097	0.406779	-0.872948	0.382691	0.615555
LOC108696594	108.721	0.190259	0.244609	0.777811	0.436681	0.666026
LOC108696596	2.73247	-1.12288	2.3799	-0.471818	0.637057	1
LOC108696597	1.28538	2.75962	2.83953	0.971857	0.331122	1
LOC108696606	2.7592	-0.139479	1.68687	-0.0826847	0.934102	1
LOC108696608	11.4624	-0.050803	1.76276	-0.0288202	0.977008	1
LOC108696610	426.263	-0.314726	0.242061	-1.30019	0.193535	0.39476
LOC108696613	108.298	-1.11771	0.265008	-4.21765	2.46857e-05	0.00023137
LOC108696618	154.203	0.251009	0.230654	1.08825	0.276487	0.500617
LOC108696619	620.6	-2.78896	0.284535	-9.80184	1.10558e-22	7.13777e-21
LOC108696620	183.757	-1.47395	0.250991	-5.87253	4.29183e-09	7.84045e-08
LOC108696621	1.44421	-0.0465725	3.63734	-0.012804	0.989784	1
LOC108696623	162.18	0.103598	0.249055	0.415964	0.677437	0.846739
LOC108696628	37.0079	1.64993	0.374105	4.41034	1.03208e-05	0.000105725
LOC108696629	295.2	2.36681	0.228222	10.3707	3.37144e-25	2.62773e-23
LOC108696630	3.72967	0.941019	2.81557	0.334219	0.738214	1
LOC108696632	1.04446	0.626927	3.15492	0.198714	0.842486	1
LOC108696633	1.76139	1.32076	3.12062	0.423236	0.672123	1
LOC108696634	2.23459	-0.0163767	2.36071	-0.00693722	0.994465	1
LOC108696636	186.555	0.0613805	0.181335	0.338493	0.734992	0.881064
LOC108696637	2.9644	0.597922	3.29161	0.181651	0.855857	1
LOC108696639	16.23	-0.819185	0.751273	-1.0904	0.275539	1
LOC108696640	5.5359	1.77276	1.98145	0.894675	0.370961	1
LOC108696641	0.957067	0.359801	3.12131	0.115273	0.908229	1
LOC108696642	6.60806	1.15107	2.5561	0.450324	0.652477	1
LOC108696643	3.67158	1.3393	2.96941	0.451032	0.651966	1
LOC108696645	10.4537	0.323765	0.941493	0.343884	0.730933	1
LOC108696650	13.0927	-1.05032	1.75478	-0.598549	0.549473	1
LOC108696652	6.7903	-0.776218	1.82263	-0.425877	0.670197	1
LOC108696656	577.971	0.830763	0.261288	3.1795	0.00147531	0.00852677
LOC108696658	8.73576	1.06782	2.51041	0.425357	0.670576	1
LOC108696659	19.6941	1.21202	0.676446	1.79174	0.0731741	0.197493
LOC108696660	13.1602	0.380993	0.794604	0.479476	0.6316	1
LOC108696663	8.34359	0.0659466	1.44976	0.0454881	0.963718	1
LOC108696666	10.1134	0.777938	1.45753	0.533738	0.593523	1
LOC108696667	78.8859	-0.79882	0.578095	-1.38181	0.167029	0.357889
LOC108696671	1.93134	0.23549	3.22425	0.0730373	0.941776	1
LOC108696673	76.1074	0.38648	0.275283	1.40394	0.160337	0.348598
LOC108696675	2.59088	2.3179	4.07854	0.568316	0.56982	1
LOC108696676	11.5382	0.158767	1.80507	0.0879558	0.929912	1
LOC108696677	21.5775	0.63606	0.970156	0.655626	0.512065	0.730147
LOC108696678	1.5019	0.854291	4.17226	0.204755	0.837764	1
LOC108696681	3.22505	0.817014	2.00964	0.406548	0.68434	1
LOC108696683	78.0099	0.129944	0.289061	0.449537	0.653044	0.830854
LOC108696684	16.0024	0.874233	2.56536	0.340784	0.733266	1		X
LOC108696685	5.63336	1.4817	2.3792	0.622772	0.533434	1
LOC108696689	184.374	1.22641	0.238872	5.13418	2.83384e-07	3.99197e-06
LOC108696690	7.80153	1.33231	1.88119	0.708229	0.478803	1
LOC108696692	5.1896	-0.907648	2.16264	-0.419695	0.674709	1
LOC108696693	2.86982	0.165537	1.98764	0.0832833	0.933626	1
LOC108696695	90.3213	-0.71922	0.298722	-2.40766	0.0160553	0.0614266
LOC108696697	22.7354	-0.551869	0.859623	-0.641989	0.52088	0.737266
LOC108696698	5.43443	-0.233829	1.22985	-0.190128	0.849209	1
LOC108696702	7.36332	-1.46545	1.32327	-1.10745	0.268101	1
LOC108696704	13.489	1.02686	0.998634	1.02827	0.303824	1
LOC108696706	1.64752	-0.322781	4.17995	-0.0772212	0.938448	1
LOC108696707	5.97376	0.121084	2.79155	0.0433751	0.965403	1
LOC108696708	3.50031	2.25128	3.91609	0.574879	0.565373	1
LOC108696709	370.369	2.00845	0.202378	9.92424	3.26594e-23	2.16154e-21
LOC108696710	7.1162	0.608702	2.43956	0.249513	0.802964	1
LOC108696711	2.42214	-0.215229	3.08676	-0.0697265	0.944411	1
LOC108696712	10.8036	0.794213	2.36252	0.336172	0.736741	1
LOC108696713	247.624	-2.282	0.181191	-12.5944	2.26536e-36	3.2729e-34
LOC108696714	6.38493	1.067	1.00263	1.06419	0.287241	1
LOC108696715	12.9355	-1.11245	1.00099	-1.11135	0.266418	1
LOC108696716	5.12498	-1.71311	2.24161	-0.764233	0.444728	1
LOC108696717	12.0079	0.306123	1.81517	0.168647	0.866074	1
LOC108696718	3.80855	0.37256	2.44621	0.152301	0.87895	1
LOC108696719	8.85764	-1.41479	1.45363	-0.97328	0.330414	1
LOC108696724	5.13612	-2.29298	2.58133	-0.888295	0.374382	1
LOC108696725	135.264	-0.422139	0.195045	-2.16432	0.03044	0.101727
LOC108696729	54.6219	0.202604	0.383956	0.527676	0.597725	0.793359		X
LOC108696730	56.4238	-0.349153	0.307049	-1.13713	0.255485	0.474782
LOC108696731	1.65993	0.101273	4.19459	0.0241437	0.980738	1
LOC108696734	4.16133	-0.386547	2.635	-0.146697	0.883371	1
LOC108696736	8.69291	1.12742	1.49545	0.753901	0.450908	1
LOC108696737	3.79212	0.363295	1.79875	0.201971	0.83994	1
LOC108696741	80.3726	-0.511451	0.253427	-2.01814	0.0435769	0.133576
LOC108696742	38.6935	-1.94956	0.435159	-4.48012	7.46028e-06	7.89477e-05
LOC108696743	90.559	-0.242069	0.25456	-0.950931	0.341639	0.574099
LOC108696744	36.7945	-0.0499891	0.388256	-0.128753	0.897553	0.96019
LOC108696748	13.2067	-3.46064	1.33119	-2.59966	0.00933171	1
LOC108696749	7.58283	1.03496	3.05554	0.338718	0.734822	1
LOC108696750	3.96177	0.43466	2.16225	0.201022	0.840681	1
LOC108696751	2.53844	-0.729906	3.51574	-0.207611	0.835533	1
LOC108696752	23.4165	-0.180839	0.841308	-0.21495	0.829806	0.928692
LOC108696753	5.32691	1.13097	2.68681	0.420936	0.673802	1
LOC108696757	15.301	-1.05493	1.21536	-0.868003	0.385393	1
LOC108696758	215.049	-0.766438	0.185756	-4.12606	3.69038e-05	0.000333613
LOC108696759	4.99167	1.17623	1.84333	0.638099	0.523409	1
LOC108696761	9.21166	0.513984	2.03684	0.252344	0.800775	1
LOC108696763	73.3848	2.41434	0.468893	5.14902	2.61847e-07	3.71732e-06
LOC108696765	212.244	-0.635727	0.220822	-2.87891	0.00399053	0.0196655
LOC108696767	1.6877	0.506002	2.49439	0.202856	0.839247	1
LOC108696768	3.28236	-0.26979	3.42547	-0.07876	0.937224	1
LOC108696771	143.525	-1.50235	0.227289	-6.60985	3.84697e-11	9.05166e-10
LOC108696772	7.0775	-1.57959	1.49405	-1.05726	0.290394	1
LOC108696775	48.4132	-0.640412	0.436092	-1.46852	0.141962	0.3205
LOC108696776	163.636	3.54672	0.312724	11.3414	8.18319e-30	8.25074e-28
LOC108696777	201.723	-0.250981	0.212106	-1.18328	0.236697	0.452028
LOC108696778	267.106	1.54102	0.226184	6.81315	9.5484e-12	2.44848e-10
LOC108696780	27.0546	0.384507	3.23336	0.118919	0.90534	0.962149
LOC108696781	114.165	0.11807	0.325652	0.362565	0.71693	0.871661
LOC108696783	44.1181	-0.646341	0.642262	-1.00635	0.314247	0.54455	X
LOC108696784	152.442	0.370609	0.286163	1.2951	0.195286	0.397177
LOC108696785	11.6059	0.210658	1.64824	0.127808	0.898301	1
LOC108696786	1.39913	-1.41322	3.62852	-0.389475	0.696925	1
LOC108696787	765.639	-0.0361525	0.197636	-0.182924	0.854857	0.941436
LOC108696788	23.8982	0.155886	0.498531	0.312691	0.754516	0.89169
LOC108696791	1.34273	-2.45091	3.64498	-0.672407	0.501325	1
LOC108696793	5.90972	-0.147975	1.98767	-0.0744464	0.940655	1
LOC108696794	8.8364	-1.93179	1.51836	-1.27229	0.203269	1
LOC108696797	5.84637	1.01893	1.58231	0.64395	0.519608	1
LOC108696798	37.3585	1.10673	0.573419	1.93005	0.0536004	0.156078	X
LOC108696800	301.987	-1.36097	0.231145	-5.88796	3.9099e-09	7.19823e-08	X
LOC108696801	4.17746	1.86741	2.38805	0.781984	0.434224	1
LOC108696802	18.958	-1.20704	1.03132	-1.17038	0.241848	0.458685
LOC108696803	6.69239	1.26398	2.0648	0.612158	0.540433	1
LOC108696804	47.3059	-1.27274	0.434218	-2.93112	0.00337745	0.0171691
LOC108696805	254.13	-0.157325	0.231391	-0.679912	0.49656	0.716447
LOC108696808	1.8442	3.50518	2.8304	1.2384	0.215566	1
LOC108696809	5.13032	-0.394076	2.75556	-0.143011	0.886281	1
LOC108696811	18.6131	0.264251	1.18222	0.22352	0.823131	0.925114
LOC108696814	6.48109	0.487274	3.10381	0.156992	0.875251	1
LOC108696815	4.64391	0.93821	2.13107	0.440252	0.659754	1
LOC108696816	3.57661	-0.281653	2.80621	-0.100368	0.920052	1
LOC108696817	8.58654	1.01559	2.12257	0.47847	0.632315	1
LOC108696818	4.68752	-0.286792	2.57864	-0.111218	0.911443	1
LOC108696820	8.36178	0.346703	1.73094	0.200297	0.841248	1
LOC108696821	3.24539	-0.907083	3.95106	-0.22958	0.818418	1
LOC108696822	6.43267	0.960428	3.17659	0.302346	0.762389	1
LOC108696823	3.12067	-0.618938	2.54257	-0.24343	0.807672	1
LOC108696824	889.755	-1.73843	0.212312	-8.18811	2.65364e-16	1.05319e-14
LOC108696825	4.26553	0.103921	1.6015	0.0648901	0.948262	1
LOC108696829	6.45915	0.805262	2.77686	0.28999	0.771824	1
LOC108696830	8.47069	1.07272	1.11234	0.964385	0.334853	1
LOC108696831	4.64714	-0.360529	3.77711	-0.095451	0.923957	1
LOC108696832	15.8043	0.522984	0.923423	0.566354	0.571153	1
LOC108696834	155.399	-0.61053	0.326391	-1.87055	0.0614075	0.173189
LOC108696836	353.957	-0.299517	0.360316	-0.831261	0.405826	0.638361
LOC108696837	27.158	0.110442	1.77198	0.0623267	0.950303	0.981048
LOC108696839	203.268	0.136113	0.23098	0.589286	0.555669	0.763134
LOC108696841	87.8201	-0.872374	0.497528	-1.75341	0.0795308	0.210149
LOC108696842	10.1337	-0.331406	2.13559	-0.155182	0.876678	1
LOC108696843	43.6104	-0.496996	0.816592	-0.608622	0.542775	0.753178	X
LOC108696844	364.555	-0.392936	0.171234	-2.29473	0.0217486	0.0784222
LOC108696845	15.436	0.48917	1.2397	0.394589	0.693147	1
LOC108696846	40.4869	0.316527	0.478058	0.66211	0.507901	0.725968
LOC108696848	423.259	-0.344516	0.184183	-1.87051	0.0614134	0.173189
LOC108696849	4.19842	-0.37925	1.74191	-0.217721	0.827647	1
LOC108696851	16.1895	0.850814	2.88578	0.29483	0.768124	1
LOC108696852	117.085	3.6653	0.337946	10.8458	2.08715e-27	1.83159e-25
LOC108696855	9.6559	0.367928	2.37454	0.154947	0.876863	1
LOC108696856	81.2169	-0.254495	0.327426	-0.777261	0.437005	0.666306
LOC108696860	1.77116	-1.27131	2.57485	-0.493742	0.621488	1
LOC108696862	78.3883	2.09791	0.445279	4.71146	2.45949e-06	2.89638e-05
LOC108696863	665.033	0.377475	0.205073	1.84069	0.0656674	0.182274
LOC108696864	36.2289	-1.20162	0.675706	-1.77832	0.0753512	0.20184
LOC108696865	11.7478	1.07487	1.20522	0.89185	0.372473	1
LOC108696870	3.3058	0.103366	3.97531	0.0260021	0.979256	1
LOC108696873	811.576	0.0157751	0.286812	0.0550015	0.956137	0.982529
LOC108696874	4.38794	1.52698	3.29233	0.4638	0.642791	1
LOC108696875	4.17376	1.95261	3.3524	0.582449	0.560264	1
LOC108696876	5.6567	1.17188	2.84411	0.412037	0.680312	1
LOC108696879	11.148	0.95655	1.78577	0.535651	0.5922	1
LOC108696880	339.921	0.271411	0.194913	1.39248	0.163779	0.353647		X
LOC108696881	12.3232	0.824921	1.21975	0.676304	0.498848	1
LOC108696882	23.9395	-0.335813	0.852996	-0.393686	0.693813	0.856602
LOC108696883	7.07267	0.278658	2.49089	0.111871	0.910925	1
LOC108696884	7.61472	-0.205443	1.24854	-0.164547	0.869301	1
LOC108696885	55.5785	-0.111769	1.72615	-0.0647502	0.948373	0.980321
LOC108696886	15.2971	0.297077	2.86265	0.103777	0.917346	1
LOC108696887	2.24911	0.36994	4.1341	0.0894849	0.928697	1
LOC108696888	59.0097	0.361821	1.85535	0.195015	0.845382	0.935872
LOC108696889	322.461	-0.714892	0.723824	-0.98766	0.323319	0.554357
LOC108696890	128.807	-0.627246	0.772219	-0.812265	0.41664	0.648526
LOC108696891	19.6152	0.408132	3.08504	0.132294	0.894752	0.95933
LOC108696892	127.361	0.658966	0.204558	3.22141	0.00127561	0.00756363
LOC108696893	19.9907	0.0587802	2.44359	0.0240548	0.980809	0.993005
LOC108696894	2.41996	0.408894	3.14077	0.130189	0.896417	1
LOC108696895	246.124	0.0420802	0.248514	0.169327	0.86554	0.946251
LOC108696896	13.0603	0.701424	1.92504	0.364368	0.715583	1
LOC108696897	9.74573	0.406434	4.09672	0.0992096	0.920972	1
LOC108696898	3.78337	0.614947	2.4541	0.25058	0.802139	1
LOC108696899	5.92365	-1.23402	1.83583	-0.672191	0.501462	1
LOC108696900	1.30405	-0.93876	3.62584	-0.258908	0.795706	1
LOC108696902	2.37457	1.33593	3.58791	0.372342	0.709639	1
LOC108696903	6.41319	-0.404248	2.24764	-0.179854	0.857267	1
LOC108696904	2.0558	-0.86711	2.74432	-0.315965	0.752029	1
LOC108696905	1.81362	-0.809027	3.26283	-0.247953	0.804171	1
LOC108696906	12.2323	-0.0798674	0.743299	-0.10745	0.914432	1
LOC108696907	1.90303	0.575658	2.15528	0.267092	0.789398	1
LOC108696908	4.77393	0.387868	1.69606	0.228687	0.819112	1
LOC108696910	8.47113	1.41102	1.02672	1.3743	0.169348	1
LOC108696911	14.3661	0.285133	1.07967	0.264092	0.791709	1
LOC108696913	119.955	-0.798529	0.240738	-3.31701	0.000909874	0.00562153
LOC108696914	4.27669	-1.79792	1.7459	-1.0298	0.303105	1
LOC108696916	13.8617	0.0656515	1.14506	0.0573344	0.954279	1
LOC108696917	6.40433	-0.229716	1.84399	-0.124575	0.90086	1
LOC108696918	1.51596	1.12886	4.21022	0.268124	0.788604	1
LOC108696919	18.2894	-0.124328	1.29917	-0.0956983	0.92376	0.969949
LOC108696920	2.5265	-1.12584	2.81622	-0.399768	0.689328	1
LOC108696921	3.90575	0.567691	3.87297	0.146578	0.883465	1
LOC108696923	3.12954	-0.755849	3.99945	-0.188988	0.850102	1
LOC108696924	2.15402	-0.246501	3.19037	-0.077264	0.938414	1
LOC108696925	4.21826	0.423462	3.33467	0.126987	0.89895	1
LOC108696926	3.43309	-0.496172	3.56615	-0.139134	0.889344	1
LOC108696930	9.44885	-0.331626	1.80247	-0.183984	0.854026	1
LOC108696931	4.63163	0.269523	2.25784	0.119372	0.904981	1
LOC108696932	1.51033	-2.78661	3.04917	-0.91389	0.360775	1
LOC108696933	1.70696	-0.801567	3.62819	-0.220928	0.825149	1
LOC108696934	4.5197	1.71233	3.28265	0.521632	0.601926	1
LOC108696935	5.51539	1.50804	2.91973	0.516501	0.605505	1
LOC108696936	31.7894	-0.413914	0.495906	-0.834663	0.403907	0.636527
LOC108696940	109.564	0.891777	0.26294	3.39157	0.000694942	0.00445267
LOC108696941	2.13728	1.39595	2.24863	0.620797	0.534733	1
LOC108696942	14.0831	0.350655	1.44065	0.2434	0.807695	1
LOC108696943	4.00952	0.348076	1.56118	0.222957	0.823569	1
LOC108696944	203.414	-2.16089	0.227772	-9.48705	2.37664e-21	1.4078e-19
LOC108696945	2069.14	-2.52661	0.205083	-12.32	7.07337e-35	9.20859e-33
LOC108696946	3.66494	1.00773	3.40012	0.296382	0.766939	1
LOC108696947	62.8035	-0.655896	0.280956	-2.33451	0.0195689	0.0720873
LOC108696948	19.2679	0.234588	0.853373	0.274895	0.783397	0.905825
LOC108696949	4.35678	1.70127	2.47884	0.686315	0.492515	1
LOC108696950	3.98425	0.0172862	2.85536	0.00605395	0.99517	1
LOC108696952	4.61576	-0.291797	1.68892	-0.172771	0.862832	1
LOC108696953	6.33478	-0.280082	3.07012	-0.0912285	0.927311	1
LOC108696954	1.87432	0.675526	3.63589	0.185794	0.852606	1
LOC108696957	2.01727	2.71099	2.76722	0.979681	0.327244	1
LOC108696958	5.97094	0.94129	1.41916	0.663275	0.507155	1
LOC108696959	4.56752	0.589767	1.32153	0.446274	0.655399	1
LOC108696961	162.448	0.250971	1.25678	0.199694	NA	1
LOC108696963	9.92196	0.733652	2.26889	0.323353	0.746428	1
LOC108696964	6.04282	-0.108229	2.83766	-0.0381401	0.969576	1
LOC108696965	2.98499	0.618141	2.68466	0.230249	0.817898	1
LOC108696966	2.1225	0.526338	4.17067	0.1262	0.899574	1
LOC108696968	1.49608	-2.4393	4.27277	-0.570894	0.568072	1
LOC108696969	2.05091	1.14421	3.2508	0.351978	0.724855	1
LOC108696972	2.43564	-0.391469	3.63804	-0.107604	0.91431	1
LOC108696973	11.1761	0.195478	1.80552	0.108267	0.913784	1
LOC108696974	7.38282	1.46813	2.25313	0.651596	0.514662	1
LOC108696975	4.27269	0.660826	2.9066	0.227354	0.820149	1
LOC108696979	2.43542	1.52454	2.49672	0.610617	0.541453	1
LOC108696981	1.65828	0.526303	4.18061	0.125891	0.899818	1
LOC108696982	4.13515	-0.0503836	2.53266	-0.0198936	0.984128	1
LOC108696983	4.11817	0.81201	3.44258	0.235872	0.813532	1
LOC108696984	3.10542	0.744596	3.50122	0.212667	0.831586	1
LOC108696985	3.77857	-0.321861	3.06455	-0.105027	0.916354	1
LOC108696986	6.83868	-1.16165	1.34093	-0.866307	0.386322	1
LOC108696988	2.24175	2.77317	3.08542	0.8988	0.368759	1
LOC108696990	2.08361	-0.163886	4.14293	-0.0395581	0.968445	1
LOC108696991	4.19385	0.528583	2.72293	0.194123	0.846079	1
LOC108696992	50.7074	-1.17528	0.478909	-2.45408	0.0141248	0.0553177
LOC108696993	3.98456	-0.386417	2.09982	-0.184024	0.853995	1
LOC108696994	2.50866	1.8107	3.5341	0.512352	0.608405	1
LOC108696996	8.14024	1.21165	0.986537	1.22819	0.219377	1
LOC108697000	33.6791	3.57775	1.59294	2.24601	0.0247033	0.0866629
LOC108697001	6.70335	0.550083	3.16103	0.17402	0.861849	1
LOC108697002	4.79916	0.718658	2.72454	0.263773	0.791955	1
LOC108697003	3.51987	-1.14031	2.4361	-0.468089	0.639721	1
LOC108697004	5.07066	0.0712288	2.61869	0.0272002	0.9783	1
LOC108697005	3.29561	-0.493879	3.14806	-0.156884	0.875336	1
LOC108697006	3.17035	0.750186	2.53372	0.296081	0.767168	1
LOC108697007	2.11755	1.3468	4.15079	0.324468	0.745584	1
LOC108697008	29.5084	1.17381	3.08588	0.38038	NA	1
LOC108697009	61.627	-1.23354	0.327822	-3.76282	0.000168007	0.00127958
LOC108697011	1.708	-0.215596	3.4485	-0.0625188	0.95015	1
LOC108697013	13.9728	0.065649	1.77413	0.0370035	0.970482	1
LOC108697014	5.54807	0.337236	1.95686	0.172335	0.863174	1
LOC108697017	17.4987	0.0553339	2.44363	0.0226442	0.981934	0.993295
LOC108697019	1.70531	-0.37349	3.59835	-0.103795	0.917332	1
LOC108697022	175.627	-0.0413993	0.279984	-0.147863	0.882451	0.954042
LOC108697024	2.21491	-0.593722	3.48355	-0.170436	0.864667	1
LOC108697025	34.2736	-0.0650468	0.738359	-0.0880964	0.9298	0.972087
LOC108697026	3.37173	0.517863	3.17662	0.163024	0.8705	1
LOC108697028	2.36275	-0.321991	2.16439	-0.148767	0.881737	1
LOC108697030	4.72228	-0.604154	2.15736	-0.280043	0.779445	1
LOC108697031	14.4453	0.658318	2.0705	0.317952	0.750522	1
LOC108697032	2.86451	0.952147	3.46992	0.2744	0.783777	1
LOC108697034	3.57228	-0.506905	2.54401	-0.199254	0.842064	1
LOC108697035	3.91234	-0.0916081	3.88079	-0.0236055	0.981167	1
LOC108697036	5.32765	2.26778	3.36223	0.674487	0.500002	1
LOC108697037	4.01738	-0.0594548	3.00566	-0.0197809	0.984218	1
LOC108697040	20.925	0.526444	3.3149	0.158811	NA	1
LOC108697041	6.0851	1.2696	2.73929	0.46348	0.64302	1
LOC108697042	5.99227	1.06343	2.83365	0.375286	0.707448	1
LOC108697043	1.49278	-0.322785	4.17995	-0.0772221	0.938447	1
LOC108697044	1.99197	0.707013	3.78461	0.186813	0.851808	1
LOC108697045	3.00822	-0.745597	3.09449	-0.240944	0.809599	1
LOC108697046	5.72945	0.669335	2.36129	0.283462	0.776823	1
LOC108697047	50.8058	1.10938	0.375883	2.9514	0.00316333	0.0162304
LOC108697048	1.69912	-1.2973	3.21743	-0.403209	0.686794	1
LOC108697049	4.81403	-0.0551446	3.27628	-0.0168315	0.986571	1
LOC108697051	5.57746	0.543404	1.87688	0.289526	0.772179	1
LOC108697052	2.27229	1.34694	4.13575	0.325683	0.744664	1
LOC108697053	2.53541	-0.389098	4.09516	-0.095014	0.924304	1
LOC108697054	1.43308	0.778491	3.66491	0.212418	0.831781	1
LOC108697055	4.18819	1.12987	2.68105	0.421428	0.673443	1
LOC108697056	4.57075	-1.05866	1.42015	-0.745461	0.455993	1
LOC108697058	4.47164	-0.0344411	2.48058	-0.0138843	0.988922	1
LOC108697059	5.56249	0.0428689	2.29969	0.0186411	0.985127	1
LOC108697060	16.8866	1.20266	0.84248	1.42753	0.153428	1
LOC108697061	5.79114	-0.554365	3.16179	-0.175333	0.860818	1
LOC108697062	1.28012	1.44753	3.12274	0.463545	0.642974	1
LOC108697063	1.35219	-0.985528	3.62366	-0.27197	0.785645	1
LOC108697064	4.8215	0.51846	3.27417	0.158348	0.874182	1
LOC108697066	7.34147	0.187224	3.48464	0.0537283	0.957152	1
LOC108697067	4.04061	-0.221608	3.86172	-0.0573858	0.954238	1
LOC108697068	4.26215	1.28491	1.83934	0.698572	0.484819	1
LOC108697069	6.0365	0.124792	1.91251	0.0652503	0.947975	1
LOC108697071	2.09273	0.595277	4.11745	0.144574	0.885047	1
LOC108697083	1.12647	-1.95269	2.65474	-0.735549	0.462005	1
LOC108697094	4.14242	-0.866414	2.45347	-0.353138	0.723985	1
LOC108697098	5.65087	0.724292	2.33844	0.309734	0.756764	1
LOC108697100	9.40157	-1.24064	0.828931	-1.49667	0.134478	1
LOC108697101	1.93131	0.279864	2.81816	0.0993075	0.920894	1
LOC108697102	1.50355	0.526326	4.18061	0.125897	0.899814	1
LOC108697106	4.0849	0.694079	2.69411	0.257629	0.796694	1
LOC108697107	5.92447	0.625277	1.64901	0.379183	0.704552	1
LOC108697109	11.0398	2.23204	1.58745	1.40605	0.159708	1	X
LOC108697110	1.67981	3.18637	4.23227	0.752875	0.451525	1
LOC108697111	2.59161	-1.35212	2.68809	-0.503004	0.614962	1
LOC108697112	96.3553	-2.9629	0.638679	-4.6391	3.49929e-06	3.99384e-05
LOC108697113	3.56783	0.0654058	2.17902	0.0300162	0.976054	1
LOC108697114	1.56249	1.84792	4.36385	0.423461	0.671959	1
LOC108697119	2.72574	0.69764	4.0687	0.171465	0.863858	1
LOC108697120	3.14942	0.29837	3.99404	0.0747037	0.94045	1
LOC108697122	1.99939	0.281042	2.87721	0.0976787	0.922187	1
LOC108697123	4.46521	2.25949	2.50554	0.901798	0.367164	1
LOC108697125	1.42038	-3.83151	3.18202	-1.20411	0.228547	1
LOC108697127	518.683	-0.999945	0.211327	-4.73174	2.22604e-06	2.6438e-05
LOC108697129	13.4601	1.15175	0.911981	1.26291	0.206623	1
LOC108697132	288.292	-0.605179	0.163487	-3.7017	0.000214156	0.00158718
LOC108697133	28.0144	-0.324546	0.915694	-0.354426	0.72302	0.875024
LOC108697135	91.8218	-0.0176699	0.221429	-0.0797993	0.936397	0.975439
LOC108697138	2.38232	-0.717087	4.12092	-0.174011	0.861857	1
LOC108697140	2.30213	1.12518	3.74875	0.300149	0.764064	1
LOC108697141	17.6676	-0.39952	1.40839	-0.283671	0.776663	0.90228
LOC108697142	101.792	-0.271911	0.23643	-1.15007	0.250115	0.468296
LOC108697143	153.987	-0.167505	0.235365	-0.711682	0.476662	0.699407
LOC108697144	8.74763	-0.241131	1.53541	-0.157047	0.875208	1
LOC108697146	6.52263	0.621673	2.851	0.218055	0.827387	1
LOC108697147	23.4141	-0.318223	2.33167	-0.136478	NA	1
LOC108697149	2.29001	-0.604654	3.51785	-0.171882	0.86353	1
LOC108697150	1.59693	2.12918	3.67451	0.579444	0.56229	1
LOC108697151	4.41117	-0.624622	3.35603	-0.186119	0.852351	1
LOC108697152	6.88063	0.383768	2.612	0.146925	0.883191	1
LOC108697154	6.53249	-0.113188	1.77919	-0.0636177	0.949275	1
LOC108697157	1.42231	-0.140951	3.65996	-0.0385117	0.96928	1
LOC108697158	1.55526	-1.42575	3.57693	-0.398596	0.690191	1
LOC108697162	1.82214	1.72394	4.19643	0.410812	0.681211	1
LOC108697164	1.50849	-2.01495	4.26891	-0.472005	0.636923	1
LOC108697165	6.5825	0.0208899	1.88077	0.0111071	0.991138	1
LOC108697168	1.80808	1.34668	4.16277	0.323506	0.746312	1
LOC108697170	2.4102	3.16894	3.23001	0.981094	0.326546	1
LOC108697172	233.761	0.229835	0.163444	1.4062	0.159665	0.347425
LOC108697173	14.8983	0.615701	0.778344	0.791039	0.428921	1
LOC108697174	226.2	-0.598927	0.217338	-2.75574	0.00585595	0.0269996
LOC108697177	7.4628	0.9178	1.74173	0.526947	0.598231	1
LOC108697178	4.09278	1.60619	3.83453	0.418876	0.675307	1
LOC108697179	18.1859	-0.0601418	0.768353	-0.0782737	0.93761	0.976087
LOC108697180	105.941	0.292613	0.2549	1.14795	0.250989	0.469149
LOC108697181	2.53376	-0.121925	4.0856	-0.0298427	0.976193	1
LOC108697182	1.71375	0.0596313	2.45318	0.0243078	0.980607	1
LOC108697183	1.72043	-0.708686	2.60996	-0.271531	0.785982	1
LOC108697186	276.544	-0.500158	0.203454	-2.45834	0.0139582	0.0547469
LOC108697189	4.30901	1.47877	2.19534	0.673595	0.500569	1
LOC108697190	6.426	1.23552	1.3732	0.899736	0.368261	1
LOC108697191	15.0637	0.431861	1.57672	0.273899	0.784162	1
LOC108697194	1.73891	-0.904918	3.03117	-0.298538	0.765293	1
LOC108697195	9.26282	-0.12575	2.35816	-0.0533253	0.957473	1
LOC108697196	49.3482	0.759964	0.537748	1.41323	0.157587	0.34423
LOC108697197	8.1703	-0.679149	1.25492	-0.541189	0.588377	1
LOC108697198	4.55798	0.337691	2.74631	0.122962	0.902137	1
LOC108697200	2.31602	0.819437	3.43703	0.238414	0.81156	1
LOC108697201	1.48037	-0.650207	4.17121	-0.15588	0.876128	1
LOC108697203	4.00655	-0.535592	2.63266	-0.203441	0.83879	1
LOC108697204	2.70182	1.30715	2.88823	0.452578	0.650853	1
LOC108697205	11.0386	0.578262	2.28569	0.252992	0.800274	1
LOC108697206	2.82889	-1.00749	2.18642	-0.460796	0.644945	1
LOC108697207	7.75975	0.705737	1.55734	0.453169	0.650427	1
LOC108697208	13.2326	0.213857	1.04406	0.204832	0.837704	1
LOC108697209	2.04097	3.40572	3.70917	0.918189	0.35852	1
LOC108697211	210.093	0.750661	0.240902	3.11605	0.00183293	0.0102597
LOC108697212	151.202	-0.271932	0.259367	-1.04845	0.294433	0.522099	X
LOC108697213	364.037	0.309821	0.159336	1.94445	0.0518414	0.152436
LOC108697214	9.39576	0.63485	1.16037	0.547109	0.584304	1
LOC108697215	10.6768	-3.53494	1.22464	-2.88653	0.00389519	1
LOC108697216	26.682	0.159605	0.678164	0.235349	0.813938	0.921382
LOC108697217	264.501	0.430025	0.18609	2.31085	0.0208413	0.0757733
LOC108697219	18.1697	0.270096	1.22659	0.220201	0.825714	0.926875
LOC108697220	7.95002	0.983983	2.74021	0.35909	0.719528	1
LOC108697221	5.57356	-0.300622	2.29624	-0.130919	0.895839	1
LOC108697222	32.431	-0.554584	0.482037	-1.1505	0.249937	0.468143
LOC108697223	8.72352	0.239315	1.17846	0.203075	0.839076	1
LOC108697224	108.883	0.520265	0.286534	1.81572	0.0694135	0.189729
LOC108697226	46.407	-0.0965536	0.343113	-0.281405	0.7784	0.903384
LOC108697227	48.4386	-1.46449	0.382667	-3.82706	0.000129684	0.00101679		X
LOC108697228	27.1228	0.113426	1.99961	0.0567243	0.954765	0.982378
LOC108697229	105.443	1.22528	0.260161	4.70971	2.48067e-06	2.91698e-05
LOC108697231	7.36201	-0.0989022	2.39375	-0.0413168	0.967043	1
LOC108697232	14.0555	0.349146	1.41474	0.246791	0.80507	1
LOC108697233	30.5219	-5.25851	1.92967	-2.72509	0.00642846	0.0292465
LOC108697234	5.76714	-1.00158	2.95311	-0.339161	0.734488	1
LOC108697235	17.1275	0.326095	1.65945	0.196507	0.844213	0.935314
LOC108697237	1.92279	-1.77045	3.57129	-0.495745	0.620074	1
LOC108697238	18.1795	-2.38838	1.65819	-1.44035	0.149767	0.331903
LOC108697239	7.81706	0.648486	2.66083	0.243716	0.807451	1
LOC108697240	12.0541	-0.441801	1.643	-0.268899	0.788008	1
LOC108697241	4.56038	1.29835	2.16198	0.600537	0.548148	1
LOC108697242	2.80901	-0.0485689	2.93811	-0.0165307	0.986811	1
LOC108697244	263.353	0.395372	0.222925	1.77356	0.0761353	0.203354		X
LOC108697246	23.7941	0.740795	2.83007	0.261759	0.793507	0.912024
LOC108697247	9.08256	0.751762	3.96908	0.189404	0.849776	1
LOC108697248	5.64716	-0.109571	2.04289	-0.0536353	0.957226	1
LOC108697250	190.493	-1.15343	0.267242	-4.31604	1.58852e-05	0.000156111
LOC108697251	4.0276	-0.00662435	3.30897	-0.00200194	0.998403	1
LOC108697252	1.92378	1.48072	3.10523	0.476847	0.633471	1
LOC108697253	4.55503	0.590321	2.4523	0.240721	0.809771	1
LOC108697255	1.957	-0.322775	4.17995	-0.0772198	0.938449	1
LOC108697256	3.63846	0.790871	3.91767	0.201873	0.840016	1
LOC108697257	2.32109	0.517427	2.85413	0.181291	0.856139	1
LOC108697258	1.7085	-0.326176	3.72635	-0.0875322	0.930248	1
LOC108697259	319.75	-0.120557	0.275923	-0.436921	0.662168	0.836947
LOC108697260	23.3117	-2.58084	0.678542	-3.80351	0.000142658	0.00110824
LOC108697261	47.6369	0.00825054	0.655618	0.0125844	0.989959	0.996309
LOC108697262	26.6352	1.79006	1.18804	1.50674	0.131877	0.304284
LOC108697263	211.448	0.728151	1.69335	0.430006	0.667191	0.840294
LOC108697264	4.20775	-0.431662	2.9335	-0.147149	0.883014	1
LOC108697265	30.9177	0.271869	0.420103	0.647149	0.517535	0.734397
LOC108697266	68.1329	-0.518971	0.378524	-1.37104	0.170363	0.362786
LOC108697267	345.896	0.134912	0.196315	0.687223	0.491942	0.712474
LOC108697268	13.4012	0.463107	1.67266	0.276868	0.781881	1
LOC108697271	3.70207	1.35623	3.4099	0.397734	0.690826	1
LOC108697272	358.438	-0.288164	0.235893	-1.22158	0.221865	0.432812
LOC108697275	14.1951	0.331791	1.10866	0.29927	0.764734	1
LOC108697277	101.658	-0.648805	0.433451	-1.49683	0.134436	0.308514
LOC108697279	2.79377	1.36008	2.85432	0.4765	0.633718	1
LOC108697281	48.7414	0.141714	0.51592	0.274682	0.783561	0.905953
LOC108697282	13.0444	0.128622	0.688629	0.18678	0.851833	1		X
LOC108697285	2.75577	2.32756	3.6809	0.632334	0.527169	1
LOC108697286	1.59736	-2.03207	3.18495	-0.638022	0.523459	1
LOC108697287	237.336	0.0623048	0.218578	0.285045	0.775609	0.901934
LOC108697288	5.26754	0.800131	2.09911	0.381177	0.703072	1
LOC108697289	6.90334	0.0644743	2.24281	0.0287471	0.977066	1
LOC108697290	3.80528	0.152849	2.26332	0.0675331	0.946157	1
LOC108697291	5.29432	1.70292	3.6542	0.466019	0.641202	1
LOC108697293	139.763	-2.85043	0.252247	-11.3002	1.30992e-29	1.29321e-27
LOC108697295	11.1389	-0.188484	3.87136	-0.0486869	0.961169	1
LOC108697297	155.51	-0.953638	0.340931	-2.79716	0.00515544	0.0243065
LOC108697299	10.1693	-1.27602	1.06523	-1.19788	0.230963	1
LOC108697300	16.3695	-0.512235	0.828731	-0.618095	0.536512	1
LOC108697302	6.94767	-1.00952	1.67753	-0.601794	0.547311	1
LOC108697305	32.2778	-0.355002	1.45318	-0.244293	0.807004	0.917887
LOC108697306	290.879	-0.0197417	0.42702	-0.0462313	0.963126	0.985631
LOC108697307	48.2753	0.251493	0.364766	0.689465	0.490531	0.711532
LOC108697308	6.89664	0.561715	1.39764	0.401902	0.687756	1
LOC108697309	101.98	-0.0616979	0.28063	-0.219855	0.825984	0.926958
LOC108697311	315.879	0.0924182	0.290733	0.31788	0.750576	0.889608
LOC108697312	223.954	-2.49471	0.249728	-9.98971	1.69071e-23	1.14456e-21		X
LOC108697317	62.1207	3.01902	1.32807	2.27323	0.0230121	0.0820464
LOC108697318	16.5732	-1.15762	1.0196	-1.13537	0.25622	1
LOC108697319	8.606	-1.13188	1.41763	-0.79843	0.424621	1
LOC108697320	14.2141	0.598498	1.31091	0.456552	0.647993	1
LOC108697321	18.7489	0.245245	0.710336	0.345252	0.729905	0.878402
LOC108697324	112.223	-0.0687904	0.246731	-0.278807	0.780393	0.904276
LOC108697325	46.4165	-0.627222	0.8049	-0.779254	0.43583	0.665331
LOC108697326	118.226	-0.104636	0.222374	-0.47054	0.63797	0.821034
LOC108697329	2.18952	0.274256	3.00263	0.0913386	0.927224	1
LOC108697332	79.8343	0.298455	0.425395	0.701596	0.482931	0.705702
LOC108697336	134.726	-0.122322	0.287413	-0.425597	0.670401	0.842008
LOC108697341	6.51274	-0.333344	1.35631	-0.245772	0.805858	1
LOC108697342	2.28202	0.296756	2.24092	0.132426	0.894648	1
LOC108697344	49.0339	0.690952	0.565606	1.22161	0.221854	0.432812
LOC108697345	4.09459	0.746378	1.50137	0.497131	0.619097	1
LOC108697348	682.409	-0.115823	0.247794	-0.467417	0.640201	0.822544
LOC108697351	7.19926	-0.644323	1.18507	-0.5437	0.586648	1
LOC108697352	12.4414	-0.906361	1.15179	-0.786918	0.43133	1
LOC108697353	4.55304	-1.31166	2.80236	-0.468055	0.639745	1
LOC108697358	2.39975	-3.14678	2.11685	-1.48653	0.137138	1
LOC108697359	18.4205	0.0379114	0.698522	0.0542737	0.956717	0.982722
LOC108697360	2.65083	-0.339506	1.95384	-0.173763	0.862052	1
LOC108697364	97.5712	0.42452	0.236833	1.79249	0.073055	0.197238
LOC108697367	21.2333	-0.447223	0.587994	-0.760591	0.446901	0.674236
LOC108697369	2.52803	-2.15015	3.51037	-0.612515	0.540197	1
LOC108697383	2.35794	-0.531998	2.85325	-0.186453	0.852089	1
LOC108697386	501.396	-0.958354	0.211288	-4.53577	5.73943e-06	6.24379e-05
LOC108697387	96.9548	-0.824312	0.301728	-2.73197	0.00629576	0.0287145
LOC108697388	107.744	-0.291412	0.349136	-0.834665	0.403906	0.636527
LOC108697389	6.16292	0.919189	1.39673	0.658102	0.510472	1
LOC108697393	74.6123	-0.580113	0.293576	-1.97602	0.0481523	0.144038
LOC108697397	52.253	0.162718	0.351615	0.462774	0.643527	0.825189
LOC108697398	4.92325	0.0179632	2.25094	0.00798032	0.993633	1
LOC108697399	596.897	0.0593287	0.28732	0.20649	0.836408	0.931684
LOC108697400	109.035	0.380004	0.231917	1.63854	0.10131	0.251619
LOC108697401	132.022	0.520032	0.228112	2.27972	0.0226243	0.0809391
LOC108697406	102.52	2.24798	0.281133	7.99613	1.28392e-15	4.83643e-14
LOC108697408	624.068	0.134235	0.267211	0.502356	0.615417	0.806509
LOC108697410	384.883	0.893951	0.232068	3.8521	0.000117107	0.000928003
LOC108697411	9.36695	-0.276924	1.77336	-0.156158	0.875909	1
LOC108697415	2.43267	-1.27338	2.07071	-0.61495	0.538588	1
LOC108697416	131.308	-0.047125	0.282233	-0.166972	0.867392	0.947136
LOC108697417	113.015	-0.33944	0.257671	-1.31734	0.187724	0.386296
LOC108697420	529.141	-0.516555	0.270551	-1.90927	0.0562277	0.16178
LOC108697421	4.61183	-2.6472	1.85155	-1.42972	0.152797	1
LOC108697426	17.4467	-0.103653	1.26031	-0.0822437	0.934453	0.974341
LOC108697427	13.7303	-0.418436	1.54494	-0.270842	0.786513	1
LOC108697428	51.6301	-5.27054	0.670559	-7.85991	3.8441e-15	1.39057e-13
LOC108697429	5.23569	0.529064	1.66342	0.318058	0.750441	1
LOC108697430	57.0093	0.410575	0.393571	1.0432	0.296854	0.524978
LOC108697431	42.1603	-0.274314	0.401418	-0.683362	0.494378	0.714523
LOC108697433	25.0983	1.0823	1.31766	0.821382	0.411429	0.643307
LOC108697434	129.847	0.0156622	0.215691	0.0726141	0.942113	0.977942
LOC108697435	3.33269	-1.12356	3.38676	-0.331749	0.740079	1
LOC108697436	13.3617	0.658828	1.04563	0.630078	0.528643	1
LOC108697440	4.45875	1.09464	1.69345	0.646394	0.518024	1
LOC108697441	15.3274	0.0936724	1.06711	0.0877814	0.93005	1
LOC108697442	3.78083	0.769429	2.34116	0.328653	0.742418	1
LOC108697444	1311.66	-1.1163	0.290783	-3.83894	0.000123569	0.000972057
LOC108697447	129.672	0.525226	0.270777	1.9397	0.0524164	0.153498
LOC108697450	121.353	-5.17008	2.74382	-1.88426	0.0595297	0.169287
LOC108697453	55.6615	0.513696	0.333069	1.54231	0.122999	0.289723
LOC108697455	4.75847	1.97634	3.36632	0.587092	0.557142	1
LOC108697458	3.38121	-1.25645	2.93676	-0.427837	0.66877	1
[truncated: 40,999 more rows]

## Sheet: 46_MBvHB
geneSymbol	baseMean	log2FoldChange	lfcSE	stat	pvalue	padj	NPC Enriched	IN Enriched
12S ribosomal RNA	62.5803	-0.189651	0.322813	-0.587494	0.556872	0.778822
16S ribosomal RNA	24244.3	-0.176495	0.326546	-0.54049	0.588859	0.79925
1a11.L	9.3369	-0.0913665	1.15089	-0.0793878	0.936724	0.974847
42sp43.L	5.85442	-5.60463	2.48443	-2.2559	0.0240768	0.170312
42sp50.L	7.09614	-2.72568	2.04573	-1.33237	0.182737	0.457099		X
ATP6	595.727	-1.42941	0.634424	-2.25308	0.0242543	0.171027
ATP8	33.1282	-1.73952	0.726078	-2.39578	0.0165853	0.14063
COX1	19387.3	-0.456783	0.306634	-1.48967	0.136312	0.3965
COX2	3453.22	-0.550162	0.395652	-1.39052	0.164371	0.434098
COX3	6220.2	-0.632885	0.461342	-1.37184	0.170114	0.441525
CYTB	50.0152	-1.26239	0.532317	-2.3715	0.0177161	0.145928
LOC100036663.S	7.60294	-4.93945	1.93256	-2.55591	0.010591	0.109218
LOC100036800	4.46724	-3.82027	3.19392	-1.19611	0.231655	1
LOC100036800.S	3.55722	-5.75844	3.59768	-1.6006	0.109466	1
LOC100036803	535.519	0.232791	0.251243	0.926555	0.354157	0.627475
LOC100036818	24.0914	-1.1891	0.587687	-2.02336	0.0430361	0.225965
LOC100036823	30.334	-2.03154	0.630806	-3.22054	0.00127949	0.0272964
LOC100036824	8.78133	-4.35036	1.6322	-2.66533	0.00769121	0.0913661
LOC100036831	362.051	0.166588	0.157041	1.06079	0.288784	0.570851
LOC100036845	24.9355	-2.08363	2.0257	-1.0286	0.303668	0.583207
LOC100036845.L	7.35308	-5.07294	2.78768	-1.81977	0.0687939	0.2836
LOC100036869	71.0833	0.0875389	0.326192	0.268366	0.788417	0.908055
LOC100036872	10.0674	-2.01223	1.75271	-1.14807	0.250939	0.532806
LOC100036880	2.57404	-5.29356	3.65343	-1.44893	0.147357	1
LOC100036883	6.72819	-5.83377	2.02189	-2.8853	0.00391039	0.0602988
LOC100036895	3.61363	-5.47009	4.07204	-1.34333	0.179166	1
LOC100036897	6.83053	-5.10551	2.4167	-2.1126	0.034635	0.203857
LOC100036907.L	29.0113	-0.518879	0.645504	-0.803836	0.421492	0.684211
LOC100036910	558.337	-0.269646	0.22709	-1.1874	0.235071	0.516228
LOC100036914	1.22285	-0.773804	2.97231	-0.260337	0.794604	1
LOC100036915	248.673	-0.106132	0.204654	-0.518595	0.604043	0.809878
LOC100036918	5.39275	-0.738481	1.62699	-0.453894	0.649905	1
LOC100036932	17.6348	-4.65179	1.55056	-3.00007	0.00269913	0.0468035
LOC100036952	18.3675	-1.89361	1.09531	-1.72883	0.0838389	0.31354
LOC100036976	5.95949	0.394362	1.46485	0.269216	0.787763	0.90764
LOC100036994	143.952	0.687114	0.30231	2.27288	0.0230336	0.16685
LOC100036997	29.9487	0.0620306	0.697573	0.0889234	0.929143	0.97158
LOC100037001	288.67	0.339873	0.235499	1.4432	0.148964	0.413023
LOC100037016	18.5007	-0.432044	0.663369	-0.651288	0.514861	0.75245
LOC100037047	4.81445	-6.00054	3.44333	-1.74265	0.081394	1
LOC100037090	210.029	-0.254052	0.276043	-0.920336	0.357397	0.630101
LOC100037108	225.346	0.97503	0.189303	5.15063	2.59616e-07	2.35428e-05
LOC100037118	30.2493	-0.817543	0.715482	-1.14265	0.253185	0.535036
LOC100037145	12.3115	-1.69047	1.32818	-1.27278	0.203097	0.480153
LOC100037177	5.1325	-1.31432	1.55079	-0.847517	0.396707	1
LOC100037180	22.8855	-1.86949	1.51224	-1.23624	0.21637	0.495389
LOC100037191.L	6.15874	-2.40475	2.71483	-0.885783	0.375734	0.647247
LOC100037197	3.57293	-2.9543	2.65147	-1.11421	0.265189	1
LOC100037204	5.73976	0.066308	2.25322	0.0294281	0.976523	1
LOC100037213	469.958	-0.0575361	0.283469	-0.202972	0.839157	0.934344
LOC100037217	55.1318	0.362827	0.423119	0.857506	0.391165	0.65932
LOC100037226	172.287	0.0991358	0.215851	0.459278	0.646034	0.835034
LOC100037235	68.1852	-0.498717	0.275458	-1.8105	0.0702183	0.286147
LOC100037903.1	4.66556	-1.65043	1.2924	-1.27703	0.201593	1
LOC100049113	8.3164	-0.804205	1.30445	-0.61651	0.537558	0.766691
LOC100049116	294.558	-0.0449007	0.175676	-0.255588	0.798269	0.913289
LOC100049121	216.722	-0.243982	0.21844	-1.11693	0.264026	0.546346
LOC100049127	42.7028	0.27773	0.408608	0.679699	0.496695	0.739908
LOC100049136	1630.88	-0.0275978	0.293073	-0.0941672	0.924976	0.969902
LOC100049756	4.22052	-0.549192	1.66241	-0.33036	0.741128	1
LOC100101274	4.50384	-3.52971	3.23369	-1.09154	0.275034	1
LOC100101277	188.635	0.528947	0.212072	2.49419	0.0126245	0.120974
LOC100101278	1.5564	-3.73026	2.82323	-1.32127	0.186411	1
LOC100101281	45.1442	0.277661	0.364465	0.761832	0.446161	0.702112
LOC100101282	11.2863	-2.0632	1.65132	-1.24943	0.211509	0.489434
LOC100101283	58.3135	-0.403846	0.324018	-1.24637	0.212628	0.491146		X
LOC100101333	60.7444	-0.233511	0.459176	-0.508545	0.611071	0.813727
LOC100125664	13.5415	-3.01911	1.74999	-1.72522	0.0844886	0.314852
LOC100125668	276.129	-0.435038	0.2061	-2.11081	0.034789	0.204352
LOC100126603	30.1513	-0.231888	0.562678	-0.412116	0.680255	0.853156
LOC100126627	1.82925	-0.191051	2.9651	-0.0644334	0.948625	1
LOC100126638	34.9776	-0.44787	0.436636	-1.02573	0.30502	0.584208
LOC100126648	99.2574	-0.618235	0.399234	-1.54855	0.12149	0.374567
LOC100126651	20.2893	-0.796699	1.21878	-0.653687	0.513313	0.751166
LOC100126657	5.77249	-2.22892	2.4937	-0.89382	0.371418	1
LOC100126660	109.34	-1.20878	0.30656	-3.94304	8.0454e-05	0.00331103
LOC100127249	9.05274	-1.82358	2.07072	-0.880651	0.378507	0.649606
LOC100127254	5.00883	-5.85747	2.649	-2.2112	0.027022	1
LOC100127277	128.52	-1.37675	0.894761	-1.53868	0.123881	0.37824
LOC100127280	94.7895	-4.10513	1.62672	-2.52356	NA	1
LOC100127286	24.526	-0.352899	0.589945	-0.59819	0.549713	0.77461
LOC100127287	16.1613	-4.87061	1.7695	-2.75253	0.0059137	0.0778387
LOC100127296	95.1775	0.134267	0.248233	0.540893	0.588581	0.79899
LOC100127300	75.6197	0.622181	0.285997	2.17548	0.0295942	0.188917
LOC100127316	45.3784	-0.475996	0.481682	-0.988197	0.323056	0.601973
LOC100127323	89.626	-0.0299045	0.348988	-0.0856892	0.931714	0.972718
LOC100127329	1311.98	0.322507	0.24403	1.32159	0.186305	0.461379
LOC100127334	2.85012	-4.84802	2.84221	-1.70572	0.0880596	1
LOC100127337	4.95671	-3.537	2.51018	-1.40906	0.158817	1
LOC100127794.L	21.5508	-1.41132	1.11596	-1.26467	0.205991	0.483295
LOC100135120.L	86.2139	-0.0222146	0.345969	-0.0642097	0.948803	0.97956
LOC100135146.L	15.8946	-2.80349	0.918415	-3.05253	0.00226922	0.0416156
LOC100135146.S	8.84679	-1.27569	1.57651	-0.809183	0.41841	0.681832
LOC100135389.L	6.4318	-6.49343	2.99229	-2.17006	0.0300026	0.190191
LOC100137612	70.1724	0.527139	0.241131	2.18611	0.0288077	0.186715
LOC100137619	4.31931	-2.22894	2.39281	-0.931518	0.351586	1
LOC100137633	2.83587	-1.89602	2.85279	-0.66462	0.506294	1
LOC100137634	176.97	-0.0378421	0.192684	-0.196395	0.844301	0.937061		X
LOC100137643	4.03486	-1.14844	2.47546	-0.46393	0.642698	1
LOC100137665	14.6927	-2.44085	1.63427	-1.49354	0.135295	0.395421
LOC100137672	21.9814	-0.412128	0.670787	-0.614394	0.538955	0.76762
LOC100137672.S	32.9537	-0.132323	0.484765	-0.272964	0.784881	0.906512
LOC100137678	10.1954	-6.54365	2.63958	-2.47905	0.0131732	0.123704
LOC100137691	272.505	-0.776101	0.319854	-2.42642	0.0152486	0.134297
LOC100137715	2.69968	-4.32659	3.32671	-1.30056	0.193408	1
LOC100144987.S	2.33056	-4.1639	2.56128	-1.62571	0.104011	1
LOC100145345.L	11.9627	-0.36861	1.40257	-0.26281	0.792697	0.909927
LOC100145450.S	105.956	0.273637	0.244071	1.12114	0.26223	0.544535
LOC100145473.S	4.63953	-3.8979	3.16042	-1.23335	0.217445	1
LOC100145531.L	21.9492	0.0837726	0.696077	0.12035	0.904206	0.961505
LOC100145533.L	72.3787	-2.81029	1.34413	-2.09079	0.0365473	0.209345
LOC100145817.L	2.5179	-5.2074	3.24368	-1.6054	0.108406	1
LOC100158280	8.87616	-2.89329	1.64312	-1.76085	0.0782641	0.302453
LOC100158299	225.732	0.514964	0.180493	2.85309	0.00432959	0.0643991
LOC100158305.L	12.4137	-5.26142	1.80254	-2.91889	0.00351283	0.0559796
LOC100158309	6.22552	-2.51107	3.04603	-0.824373	0.409728	0.674021
LOC100158314	5.77096	-4.54302	2.56981	-1.76784	0.0770878	1
LOC100158321	73.7551	0.131855	0.270749	0.487001	0.626258	0.822816
LOC100158331	35.3485	-0.0155202	0.497513	-0.0311955	0.975114	0.990626
LOC100158340	801.69	-0.187133	0.213904	-0.874844	0.381659	0.652453
LOC100158347	166.973	-0.184199	0.24152	-0.762664	0.445664	0.701841
LOC100158361	184.449	0.0199775	0.267585	0.0746584	0.940487	0.976322
LOC100158366	46.4092	-3.00288	0.836949	-3.58789	0.000333363	0.0101259
LOC100158370	111.934	0.0980474	0.235228	0.416818	0.676811	0.851404
LOC100158382	120.602	-0.103841	0.26605	-0.390307	0.69631	0.861409
LOC100158389	7.08359	-2.04495	2.09668	-0.975329	0.329397	0.607246
LOC100158394	185.264	-0.215335	0.200215	-1.07552	0.282143	0.564088
LOC100158410.L	111.037	-0.426554	0.327562	-1.30221	0.192845	0.469806
LOC100158433.L	55.5545	0.109634	0.389619	0.281389	0.778412	0.90308
LOC100158544.S	7.83478	-6.87727	4.25387	-1.61671	0.105941	0.348663
LOC100170619.S	5.90196	-0.651972	1.68255	-0.38749	0.698394	0.862452
LOC100174801	8.8985	-2.88562	1.73388	-1.66426	0.0960602	0.333402
LOC100174804	292.099	0.152113	0.211053	0.720734	0.471073	0.72094
LOC100174808	11.7109	-4.05932	3.58761	-1.13148	0.257852	0.539591
LOC100189560	71.4898	0.20137	0.304149	0.662079	0.507921	0.74788
LOC100189574	77.872	1.08096	0.39148	2.7612	0.00575886	0.0767726
LOC100191024	34.6537	-1.22939	1.04228	-1.17952	0.238191	0.519643
LOC100191026	194.598	0.380337	0.226083	1.68229	0.092513	0.328284
LOC100192369	9.62461	-0.448113	1.09997	-0.407388	0.683723	0.854791
LOC100217319	51.3287	0.340044	0.327911	1.037	0.299735	0.579989
LOC100301958	52.0187	-0.779546	0.31934	-2.44112	0.0146418	0.131743
LOC100335021	11.7079	1.35683	1.65964	0.817546	0.413616	0.677417
LOC100335115	1915.15	-1.06333	0.55319	-1.92218	0.054583	0.254099
LOC100337617	12.401	-2.34075	1.35914	-1.72223	0.0850278	0.315974
LOC100379118	9.06882	0.43053	1.08637	0.396302	0.691882	0.859253
LOC100462904	951.88	0.567414	0.274312	2.0685	0.0385931	0.215639
LOC100462905	451.656	1.36677	0.194215	7.03739	1.95876e-12	4.66438e-10
LOC100485017.S	2.90261	-3.2997	3.32831	-0.991407	0.321487	1
LOC100485044.L	5.5335	-1.41418	1.51866	-0.931201	0.35175	1
LOC100485105.S	14.1614	-2.90763	3.23256	-0.899479	0.368397	0.641075
LOC100485132.L	7.15864	-5.80119	3.0567	-1.89786	0.0577148	0.260613
LOC100485199-like.S	11.9228	0.418079	0.853008	0.490123	0.624047	0.821399
LOC100485290.L	30.7999	-0.196105	0.406394	-0.482548	0.629417	0.82457
LOC100485292.L	7.25016	-1.60282	2.17697	-0.736262	0.461571	0.713779
LOC100485439.L	2.03311	-1.74153	3.32205	-0.524234	0.600116	1
LOC100485470.1.L	10.7362	-0.464672	1.20091	-0.386935	0.698805	0.862642
LOC100485504.L	1.51917	-3.82456	3.26332	-1.17198	0.241203	1
LOC100485669.L	12.6163	-3.38075	1.3956	-2.42243	0.0154171	0.135127
LOC100485723.L	2.00147	1.67849	2.66084	0.630815	0.528162	1
LOC100485767-like.S	1.63549	-0.52241	2.32624	-0.224573	0.822311	1
LOC100485776.L	8.93233	-6.9694	4.02051	-1.73346	0.0830139	0.312153
LOC100485784-like.S	2.86807	-5.29915	4.17356	-1.2697	0.204193	1
LOC100485829.S	4.468	-2.89323	2.07921	-1.39151	0.164072	1
LOC100485975.L	2.74181	-0.841134	2.98814	-0.28149	0.778334	1
LOC100486031.S	3.03006	-2.71282	3.04698	-0.890332	0.373288	1
LOC100486034.L	1.12773	1.66548	2.96166	0.562349	0.573879	1
LOC100486127.S	33.9537	-2.12321	0.656585	-3.23371	0.00122194	0.0263978
LOC100486133.S	37.0738	1.14309	0.576653	1.98229	0.0474468	0.237437
LOC100486289.L	10.5271	-4.04401	1.95224	-2.07148	0.0383144	0.214543
LOC100486352-like.L	3.9439	-1.15583	3.23747	-0.357017	0.721079	1
LOC100486352-like.S	7.27029	-5.51778	2.81501	-1.96013	0.0499812	0.243467
LOC100486380.L	6.48486	0.534697	1.96038	0.272751	0.785045	0.906512
LOC100486434-like.L	3.94819	-4.16389	2.42596	-1.71639	0.0860914	1
LOC100486572.L	4.08181	-5.61851	3.53186	-1.59081	0.111653	1
LOC100486657.L	1.94519	-4.1201	2.95366	-1.39491	0.163042	1
LOC100486734-like.L	8.96526	-0.637799	0.984851	-0.647609	0.517238	0.753697
LOC100486734-like.S	10.7152	-1.81655	1.85926	-0.977027	0.328556	0.606699
LOC100486853.L	2.6885	-4.6118	4.21693	-1.09364	0.274113	1
LOC100486894.S	3.13632	-1.63401	2.07367	-0.787981	0.430708	1
LOC100486959.1	1.58617	-3.84618	3.78451	-1.01629	0.309489	1
LOC100486966.L	18.7266	-3.79967	1.28174	-2.96446	0.00303216	0.050447
LOC100487224.L	46.066	-0.565062	0.454566	-1.24308	0.213839	0.492266
LOC100487262.S	63.5538	-0.195142	0.453871	-0.42995	0.667232	0.846764
LOC100487264.1	3.29504	-5.29867	4.11881	-1.28646	0.198284	1
LOC100487306.S	2.50312	-4.6114	4.18723	-1.1013	0.270766	1
LOC100487408.L	6.74805	-6.30209	3.33965	-1.88705	0.0591536	0.263576
LOC100487412.L	9.89607	-5.83044	2.45224	-2.37759	0.017426	0.144576
LOC100487423.L	5.45231	-5.75147	3.08589	-1.8638	0.0623501	1
LOC100487482.S	2.69852	-2.5556	2.70662	-0.944204	0.345065	1
LOC100487499.S	209.472	0.0731667	0.214849	0.34055	0.733442	0.880305
LOC100487648.1.L	4.27361	-3.54039	2.43009	-1.45689	0.145145	1
LOC100487668.L	9.75167	0.616501	0.846033	0.728697	0.466187	0.717498
LOC100487732	1.31082	-1.32376	4.16066	-0.318161	0.750363	1
LOC100487740.S	3.39372	0.473672	2.53695	0.186709	0.851889	1
LOC100487885.L	1.3659	-4.60364	3.71834	-1.23809	0.215682	1
LOC100487918.L	4.06479	-5.71717	2.77369	-2.06121	0.0392827	1
LOC100488087.L	18.9991	-0.0299552	0.629225	-0.0476064	0.96203	0.98547
LOC100488137.L	3.52792	-4.65838	3.67934	-1.26609	0.20548	1
LOC100488166.L	2.12832	-4.28393	4.24718	-1.00865	0.313141	1
LOC100488177.S	9.60662	-3.8258	2.08999	-1.83053	0.0671701	0.280122
LOC100488227.L	5.97738	-4.52388	2.35138	-1.92393	0.0543639	0.253571
LOC100488328.L	1.40825	-1.74761	3.82492	-0.456902	0.647742	1
LOC100488333.L	20.0876	-0.298291	0.824315	-0.361866	0.717452	0.872087
LOC100488348.S	6.58663	-0.819376	1.22334	-0.669789	0.502993	0.744807
LOC100488377.S	3.83553	-3.47161	2.81553	-1.23302	0.217567	1
LOC100488442.S	17.0079	1.4167	1.05857	1.33831	0.180796	0.455163
LOC100488486.L	4.93219	-0.337933	2.28974	-0.147585	0.88267	1
LOC100488567.L	104.745	-0.735869	0.290692	-2.53143	0.0113597	0.113667
LOC100488577.L	10.4752	-2.4669	2.46764	-0.999698	0.317457	0.596304
LOC100488626.L	27.8339	0.480867	0.511359	0.940372	0.347027	0.62137
LOC100488642.L	2.47911	-5.36445	3.68477	-1.45584	0.145436	1
LOC100488689.S	87.8661	0.249139	0.316439	0.787321	0.431094	0.691349
LOC100488695.S	2.77374	-5.76358	4.26168	-1.35242	0.176241	1
LOC100488697.L	6.08107	-1.00884	1.4511	-0.695226	0.486914	0.732505
LOC100488701.S	6.05799	-3.07845	2.47948	-1.24157	0.214395	0.492747
LOC100488805.L	7.54751	-6.62864	3.64511	-1.8185	0.0689876	0.283764
LOC100488828.L	6.78082	-5.23816	2.76093	-1.89724	0.0577957	0.260728
LOC100488885-like.L	226.893	0.0261561	0.197457	0.132465	0.894616	0.957615
LOC100488906.L	3.29302	-3.90257	3.33113	-1.17155	0.24138	1
LOC100489069.S	7.24884	-6.29296	2.68378	-2.34481	0.0190366	0.150914
LOC100489074.L	5.63929	-6.1486	3.42816	-1.79356	0.0728838	1
LOC100489118.L	2.57265	-5.29942	4.20604	-1.25996	0.207685	1
LOC100489122.L	13.2253	-1.94285	1.14348	-1.69907	0.0893056	0.323189
LOC100489157-like.S	1.86277	-3.89308	3.01335	-1.29195	0.196376	1
LOC100489188.L	5.37063	1.76532	1.48939	1.18526	0.235913	1
LOC100489282.L	1.9537	-4.28457	4.28738	-0.999345	0.317628	1
LOC100489282.S	4.56043	-4.96238	2.95217	-1.68093	0.0927774	1
LOC100489286-like.L	2.93717	-4.58692	3.11852	-1.47086	0.141328	1
LOC100489326.S	9.13074	-2.27782	1.15585	-1.97069	0.0487599	0.240845
LOC100489554.L	5.11192	-4.19109	2.26564	-1.84985	0.0643354	1
LOC100489764.L	10.6827	-2.86229	1.60332	-1.78522	0.0742255	0.293654
LOC100489771.S	54.196	-0.208591	0.377107	-0.553134	0.580172	0.793897
LOC100489773-like.S	12.1365	0.168285	0.799242	0.210556	0.833234	0.931739
LOC100489832.L	1.43565	1.99521	2.85734	0.698277	0.485004	1
LOC100489882.L	5.24709	-5.76091	3.86943	-1.48882	0.136534	1
LOC100489972.L	2.5743	-5.47103	4.1924	-1.30499	0.191897	1
LOC100490013.L	2.7117	-4.94447	2.62307	-1.885	0.0594305	1
LOC100490018.L	11.2558	-2.54627	2.17884	-1.16863	0.242552	0.524289
LOC100490286.S	1.45626	-4.2841	4.25761	-1.00622	0.314309	1
LOC100490389-like.L	5.11968	-2.94369	2.48695	-1.18365	0.23655	1
LOC100490462.L	5.21275	-0.491662	2.46695	-0.199299	0.842029	1
LOC100490530.L	48.9486	0.0162317	0.271238	0.0598432	0.952281	0.981316
LOC100490553.S	7.39841	-6.557	2.75686	-2.37843	0.0173864	0.144479
LOC100490559.S	21.8932	-0.762167	0.674675	-1.12968	0.258611	0.540418
LOC100490682.1.L	8.93724	-3.44461	2.26451	-1.52113	0.128228	0.385474
LOC100490725.S	2.25606	-4.26101	3.32444	-1.28172	0.19994	1
LOC100490741.L	27.1857	-0.195066	0.68619	-0.284274	0.776201	0.902173
LOC100490786.L	3.57601	-5.27548	2.82054	-1.87038	0.0614315	1
LOC100490894.S	3.16183	-5.10382	4.13953	-1.23295	0.217596	1
LOC100490918.L	7.30465	-2.46468	2.13996	-1.15174	0.249428	0.531681
LOC100490937.L	1.45447	-1.2748	2.50241	-0.509429	0.610452	1
LOC100490989.L	5.43779	-4.13374	3.51734	-1.17525	0.239896	1
LOC100491090.L	2.26466	-5.17244	3.2731	-1.58029	0.11404	1
LOC100491107.L	1.72245	-3.85358	4.04455	-0.952784	0.340699	1
LOC100491114.S	3.4949	-4.60018	3.56107	-1.2918	0.196427	1
LOC100491211.L	15.1033	-3.08598	1.9099	-1.61578	0.106142	0.348962
LOC100491220.L	1.51596	-4.28457	4.28738	-0.999345	0.317628	1
LOC100491357.S	6.6694	-6.10778	3.36398	-1.81564	0.0694253	0.284623
LOC100491389.L	5.91316	-5.28166	3.02535	-1.7458	0.0808459	0.307597
LOC100491404.S	2.21342	-5.09814	3.67772	-1.38622	0.165679	1
LOC100491437-like.L	16.3937	1.39892	1.48227	0.94377	0.345287	0.61982
LOC100491437-like.S	4.08562	-2.76207	3.19545	-0.864375	0.387382	1
LOC100491450.S	13.5292	-1.48409	1.24434	-1.19267	0.232997	0.51385
LOC100491454.L	3.9427	-0.495928	2.02868	-0.244458	0.806876	1
LOC100491454.S	2.9181	-3.91103	3.74937	-1.04312	0.296894	1
LOC100491587.L	6.18931	-3.20007	3.03017	-1.05607	0.290937	0.572936
LOC100491587.S	4.97618	-6.08157	3.0469	-1.99598	0.0459358	1
LOC100491616-like.L	14.496	-1.18668	1.10293	-1.07594	0.281954	0.56389
LOC100491629.S	7.3302	-3.81847	2.31631	-1.64852	0.099247	0.338248
LOC100491824.S	5.79235	-2.74444	3.1304	-0.876706	0.380646	1
LOC100491907.S	3.11118	-0.934431	1.65405	-0.564935	0.572118	1
LOC100491930.L	3.66307	-4.05145	2.3178	-1.74797	0.0804684	1
LOC100491939.S	113.763	0.207233	0.330322	0.627368	0.530418	0.762296
LOC100491961.S	2.13102	-3.22889	3.68387	-0.876494	0.380762	1
LOC100491966.1.L	7.79389	-6.76152	2.91216	-2.32182	0.0202426	0.155918
LOC100492080.1	1.98524	-2.86788	3.36406	-0.852508	0.393932	1
LOC100492152.L	1.52262	-1.30346	3.82896	-0.340422	0.733539	1
LOC100492197-like.L	200.127	0.155917	0.233602	0.66745	0.504485	0.745707
LOC100492376.L	1.69552	-5.10506	4.27003	-1.19555	0.23187	1
LOC100492420.S	15.612	-2.78555	1.33894	-2.08042	0.0374873	0.211621
LOC100492487.S	60.7597	0.68375	0.311339	2.19616	0.0280808	0.184024
LOC100492546-like.S	3.90746	-3.96896	2.17716	-1.82299	0.0683043	1
LOC100492639-like.S	7.10719	-0.551928	1.55034	-0.356004	0.721838	0.874169
LOC100492643.L	1.65413	0.528477	2.33529	0.2263	0.820968	1
LOC100492708	27.9103	-0.748606	0.646214	-1.15845	0.246681	0.528837
LOC100492859.S	4.47331	-3.52349	1.93472	-1.82118	0.0685789	1
LOC100492885.L	81.2207	-0.820725	0.558332	-1.46996	0.141573	0.403622
LOC100492888-like.L	20.7953	-1.71646	0.927047	-1.85154	0.0640923	0.27447
LOC100492899.L	3.29309	0.000901926	2.2785	0.000395841	0.999684	1
LOC100492951-like.S	135.137	0.180071	0.262446	0.686126	0.492634	0.736951
LOC100492960.S	1.75002	-3.84507	3.75017	-1.0253	0.305219	1
LOC100493020.L	2.6004	-4.58066	2.96811	-1.54329	0.122759	1
LOC100493071.L	44.6537	-5.3626	3.31683	-1.61679	0.105925	0.348663
LOC100493076.L	4.07194	-1.35074	2.51246	-0.537617	0.590842	1
LOC100493184.L	17.4577	-6.21796	2.02091	-3.07682	0.00209225	0.0394605
LOC100493194.L	10.8198	-4.58219	2.367	-1.93587	0.0528839	0.25007
LOC100493237.L	1.98126	-2.35019	2.56022	-0.917966	0.358637	1
LOC100493256-like.L	4.91748	-5.11222	2.62408	-1.9482	0.0513916	1
LOC100493256-like.S	2.479	-5.09858	3.70779	-1.3751	0.169101	1
LOC100493283-like.L	37.3803	-0.402752	0.644062	-0.625331	0.531754	0.76313
LOC100493356.L	11.2001	-7.13689	2.51054	-2.84277	0.00447233	0.0656848
LOC100493356.S	6.35194	-4.53718	2.41285	-1.88043	0.0600498	0.26571
LOC100493381.L	7.14526	-5.7552	3.32444	-1.73118	0.0834203	0.312964
LOC100493382.L	60.5282	-0.79541	0.548142	-1.4511	0.146752	0.409657
LOC100493422.S	2.98434	-5.3887	3.20382	-1.68196	0.0925757	1
LOC100493447.L	2.04298	-3.90224	3.31748	-1.17626	0.239489	1
LOC100493447.S	1.83394	-1.8663	3.79483	-0.4918	0.622861	1
LOC100493463.L	3.66254	-1.75884	3.25424	-0.540477	0.588868	1
LOC100493498.L	1.96908	-3.13993	3.29647	-0.952512	0.340837	1
LOC100493512.1	4.15979	-0.878715	2.55656	-0.343711	0.731064	1
LOC100493549.L	5.33207	-6.30249	3.38385	-1.86252	0.06253	1
LOC100493618.L	4.45362	-3.20352	3.20975	-0.998059	0.318251	1
LOC100493672.L	3.9166	-1.86078	2.94879	-0.631032	0.52802	1
LOC100493742.1	12.4744	-6.16447	2.52319	-2.44312	0.0145607	0.131164
LOC100493745.L	206.755	0.258427	0.193444	1.33593	0.181572	0.455959
LOC100493773.L	1.96941	-5.10506	4.27003	-1.19555	0.23187	1
LOC100493778.L	2.66203	-3.25135	4.22121	-0.770242	0.441156	1
LOC100493912.S	22.4095	-0.50899	0.95899	-0.530756	0.595588	0.803571
LOC100493955.L	7.00276	-3.53039	2.58213	-1.36724	0.171549	0.442982
LOC100493956.S	5.46971	-6.11149	3.81478	-1.60206	0.109143	1
LOC100493968.1.L	9.39478	-0.838988	0.909782	-0.922186	0.356432	0.62941
LOC100494033.L	25.1979	-4.33021	2.23523	-1.93725	0.0527143	0.249761
LOC100494136.L	10.9009	-3.95175	2.19213	-1.80269	0.0714364	0.287837
LOC100494386.L	10.268	0.6072	0.820372	0.740152	0.459208	0.711846
LOC100494454.S	4.21003	-5.79192	3.10194	-1.86719	0.061875	1
LOC100494476.L	31.5122	0.281774	0.613544	0.459256	0.64605	0.835034
LOC100494536.S	4.96096	-4.74339	2.5957	-1.8274	0.0676394	1
LOC100494571.S	3.39589	-4.87066	3.62524	-1.34354	0.179096	1
LOC100494592.L	1.05434	-3.83586	3.5018	-1.0954	0.273342	1
LOC100494604.L	9.23025	-6.11392	4.25855	-1.43568	0.151093	0.415561
LOC100494615.S	1.50519	-4.2846	4.28738	-0.999352	0.317624	1
LOC100494832.S	1.52377	-3.93331	3.75648	-1.04707	0.295066	1
LOC100494870.L	2.86725	-3.29797	3.2918	-1.00188	0.316404	1
LOC100494943.L	4.90274	-5.75726	3.48946	-1.6499	0.0989636	1
LOC100494970.S	2.06115	-4.87224	3.71437	-1.31173	0.189612	1
LOC100495010.S	84.2058	-0.347827	0.324543	-1.07174	0.283835	0.565802
LOC100495012.L	3.60493	-5.03677	3.2664	-1.54199	0.123075	1
LOC100495012.S	7.74418	-6.54539	2.73918	-2.38954	0.0168694	0.141837
LOC100495079.L	4.12	-5.27328	2.75946	-1.91098	0.0560068	1
LOC100495096.1	3.36839	-1.46818	1.46547	-1.00185	0.316418	1
LOC100495101.S	3.12757	-4.25624	3.20582	-1.32766	0.184291	1
LOC100495179.L	10.3056	0.16322	1.57834	0.103412	0.917636	0.967107
LOC100495179.S	2.35048	-5.29357	3.65351	-1.4489	0.147366	1
LOC100495222.1.L	10.0548	-2.89798	1.97471	-1.46755	0.142226	0.404703
LOC100495284.L	1.35267	1.10348	3.79522	0.290754	0.771239	1
LOC100495333.S	3.57185	-3.63175	3.24709	-1.11846	0.263369	1
LOC100495347.1	2.76673	-4.1191	2.92398	-1.40873	0.158915	1
LOC100495360.L	2.9631	-5.46587	3.64809	-1.49828	0.13406	1
LOC100495379.L	4.18712	-2.89251	2.03285	-1.42289	0.154768	1
LOC100495541.1.L	2.21588	-5.09839	3.69448	-1.38	0.167586	1
LOC100495655-like.S	3.98023	-5.71573	3.1217	-1.83097	0.0671052	1
LOC100495801-like.L	2.56993	-3.28206	2.95716	-1.10987	0.267056	1
LOC100495841.L	2.3785	-1.37985	3.31312	-0.416481	0.677058	1
LOC100495874.L	6.15202	-6.30244	3.3776	-1.86595	0.062048	0.270328
LOC100495886.1.S	5.73021	-6.89135	3.30801	-2.08323	0.0372301	1
LOC100495895.S	47.212	-0.126214	0.324663	-0.388753	0.697459	0.861912
LOC100495966	1.62233	-3.8026	2.92896	-1.29828	0.194193	1
LOC100496010.S	14.4818	-1.78746	0.938352	-1.90489	0.0567944	0.25862
LOC100496035.L	1.35349	-4.27331	3.72268	-1.14791	0.251004	1
LOC100496074-like.L	4.09518	1.07287	1.43156	0.749435	0.453595	1
LOC100496137-like.L	25.3416	-0.484158	0.729452	-0.663728	0.506865	0.747064
LOC100496293.L	11.9659	-3.79588	2.34005	-1.62214	0.104774	0.346746
LOC100496329.L	1.26472	-1.30124	3.73292	-0.348585	0.727401	1
LOC100496329.S	7.20017	1.77425	1.83234	0.968297	0.332896	0.60962
LOC100496462.L	10.9452	-1.08733	0.811149	-1.34048	0.180089	0.454301
LOC100496618.L	8.09017	-2.94465	2.42911	-1.21223	0.225423	0.506123
LOC100496658.L	17.1055	-1.35586	1.05053	-1.29064	0.196828	0.474065
LOC100496716.L	27.4167	-0.660858	0.645131	-1.02438	0.305657	0.584872
LOC100496797-like.L	93.2026	-1.3433	0.311217	-4.3163	1.5867e-05	0.000854871
LOC100496797.L	321.136	-1.35636	0.200713	-6.75769	1.40211e-11	2.84019e-09
LOC100496837.S	9.16408	-1.83147	1.51688	-1.20739	0.22728	0.508126
LOC100496844.L	8.95411	-3.16146	1.80905	-1.74758	0.0805369	0.307025
LOC100496853.L	1.81137	-4.28457	4.28738	-0.999345	0.317628	1
LOC100496870.L	5.98763	-0.339006	2.00188	-0.169344	0.865526	0.94569
LOC100496873.L	8.77536	-1.39851	1.60257	-0.872672	0.382842	0.653081
LOC100496891.S	4.22778	0.120166	2.17856	0.0551582	0.956012	1
LOC100496975.L	3.89892	-3.13894	3.19592	-0.982173	0.326015	1
LOC100496975.S	38.083	-0.444688	0.5457	-0.814894	0.415133	0.678725
LOC100497020.L	11.3718	-1.66217	0.981816	-1.69295	0.0904644	0.32487
LOC100497066.L	10.8626	-7.16917	4.25264	-1.68582	0.0918313	0.326881
[truncated: 42,618 more rows]

## Sheet: 46_MBvSC
geneSymbol	baseMean	log2FoldChange	lfcSE	stat	pvalue	padj	NPC Enriched	IN Enriched
[truncated: 42,998 more rows]

[truncated: 1 more sheets: 46_HBvSC]
